# Supplementary material for: A single-cell atlas of the miracidium larva of Schistosoma mansoni reveals cell types, developmental pathways, and tissue architecture
Source: eLife journal article supplement (doi:10.7554/elife.95628), 2024-05-13
Supplement: figures [file elife-95628-figures-v1.pdf]

---

## Figures and figure supplements

A single-cell atlas of the miracidium larva of *Schistosoma mansoni* reveals cell types, developmental pathways, and tissue architecture

**Teresa Attenborough and Kate A Rawlinson et al.**

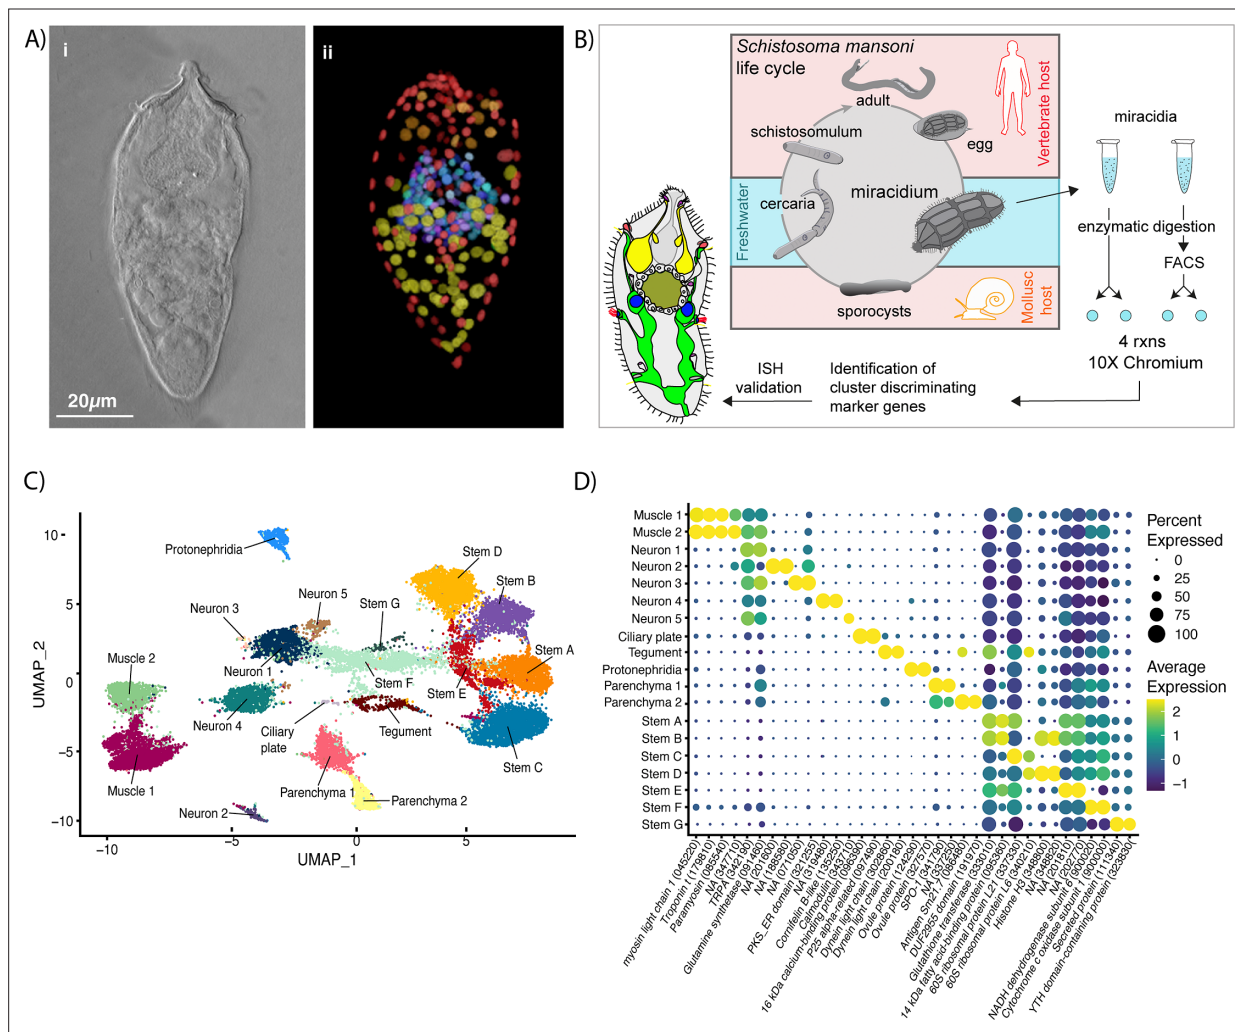

**Figure 1.** Identification of 19 transcriptionally distinct cell types in the miracidium. **(A)** The miracidium is composed of ~365 cells; **(i)** differential interference contrast (DIC) microscopy image of miracidium, **(ii)** a maximum intensity projection (MIP) of a confocal z-stack of miracidium, stained with 4',6-diamidino-2-phenylindole (DAPI), and with nuclei segmented to enable counting (larval anterior pole at the top in all images). **(B)** Experimental scheme describing the parasite's life cycle (images of developmental stages not to scale), parasite dissociation, single-cell analysis of miracidium, and validation pipeline. An average of 9975 miracidia per sample were dissociated; two samples were enriched for live cells (propidium iodide negative) using fluorescence-activated cell sorting (FACS), another two samples were unsorted. Cells were loaded according to the 10X Chromium single-cell 3' protocol. Clustering was carried out to identify distinct populations and population-specific markers. Validation of population-specific markers was performed by in situ hybridisation (ISH). **(C)** Uniform Manifold Approximation and Projection (UMAP) representation of 20,478 miracidium single cells. Cell clusters are coloured and distinctively labelled by cluster identity. **(D)** Gene expression profiles of the top population markers identified for each cell cluster (gene identifiers shown in parenthesis but with 'Smp\_' prefix removed for brevity). The colours represent the expression level from yellow (high expression) to dark blue (low expression). Gene expression has been log-normalised and scaled using Seurat (v. 4.3.0). The sizes of the circles represent the percentages of cells in those clusters that expressed a specific gene.



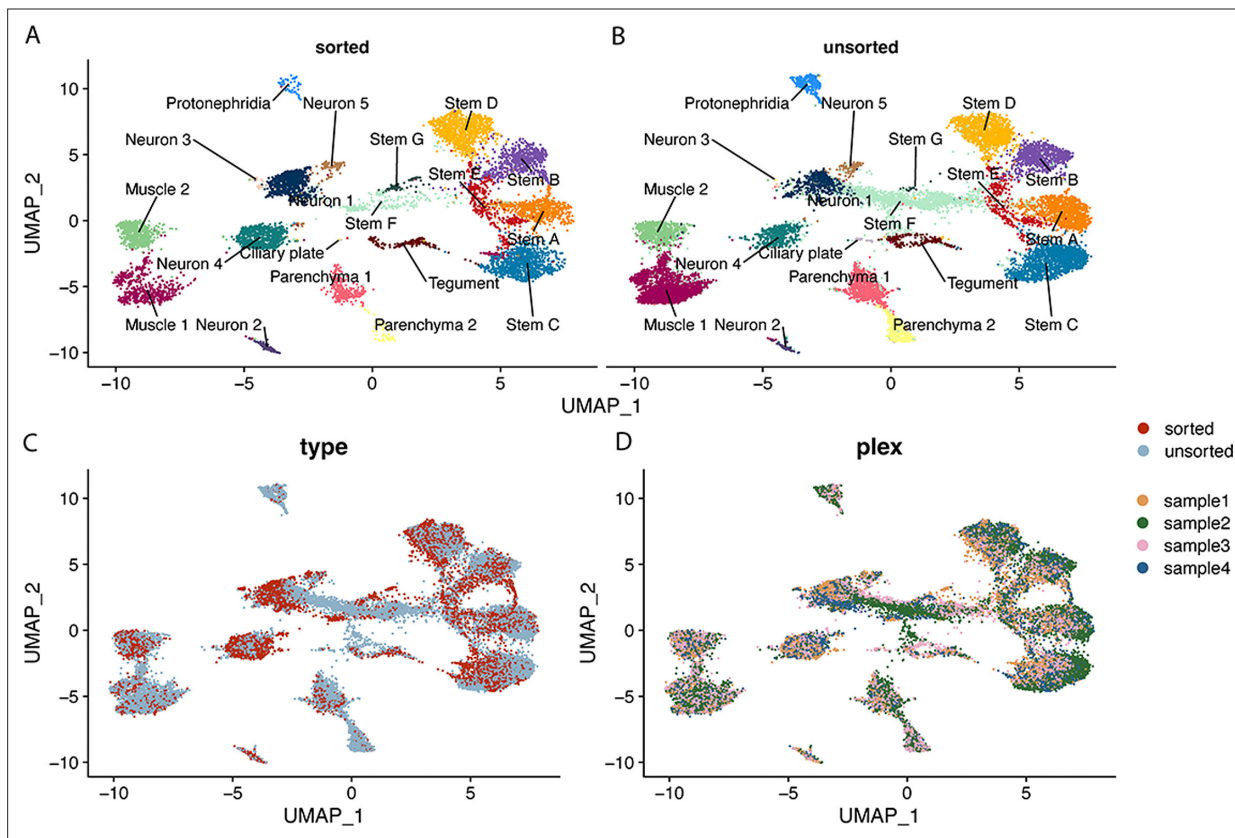

**Figure 1—figure supplement 1.** Contributions of sorted and unsorted cells to Seurat clusters. This figure uses the same UMAP topology as presented in **Figure 1C**. **(A)** Shows contribution of sorted cells to labelled clusters, **(B)** shows contribution of unsorted cells to labelled clusters. **(C)** UMAP where cells are coloured by sorted and unsorted treatment. **(D)** UMAP where cells are coloured by sample of origin (samples 1 and 4 are sorted, samples 2 and 3 are unsorted).

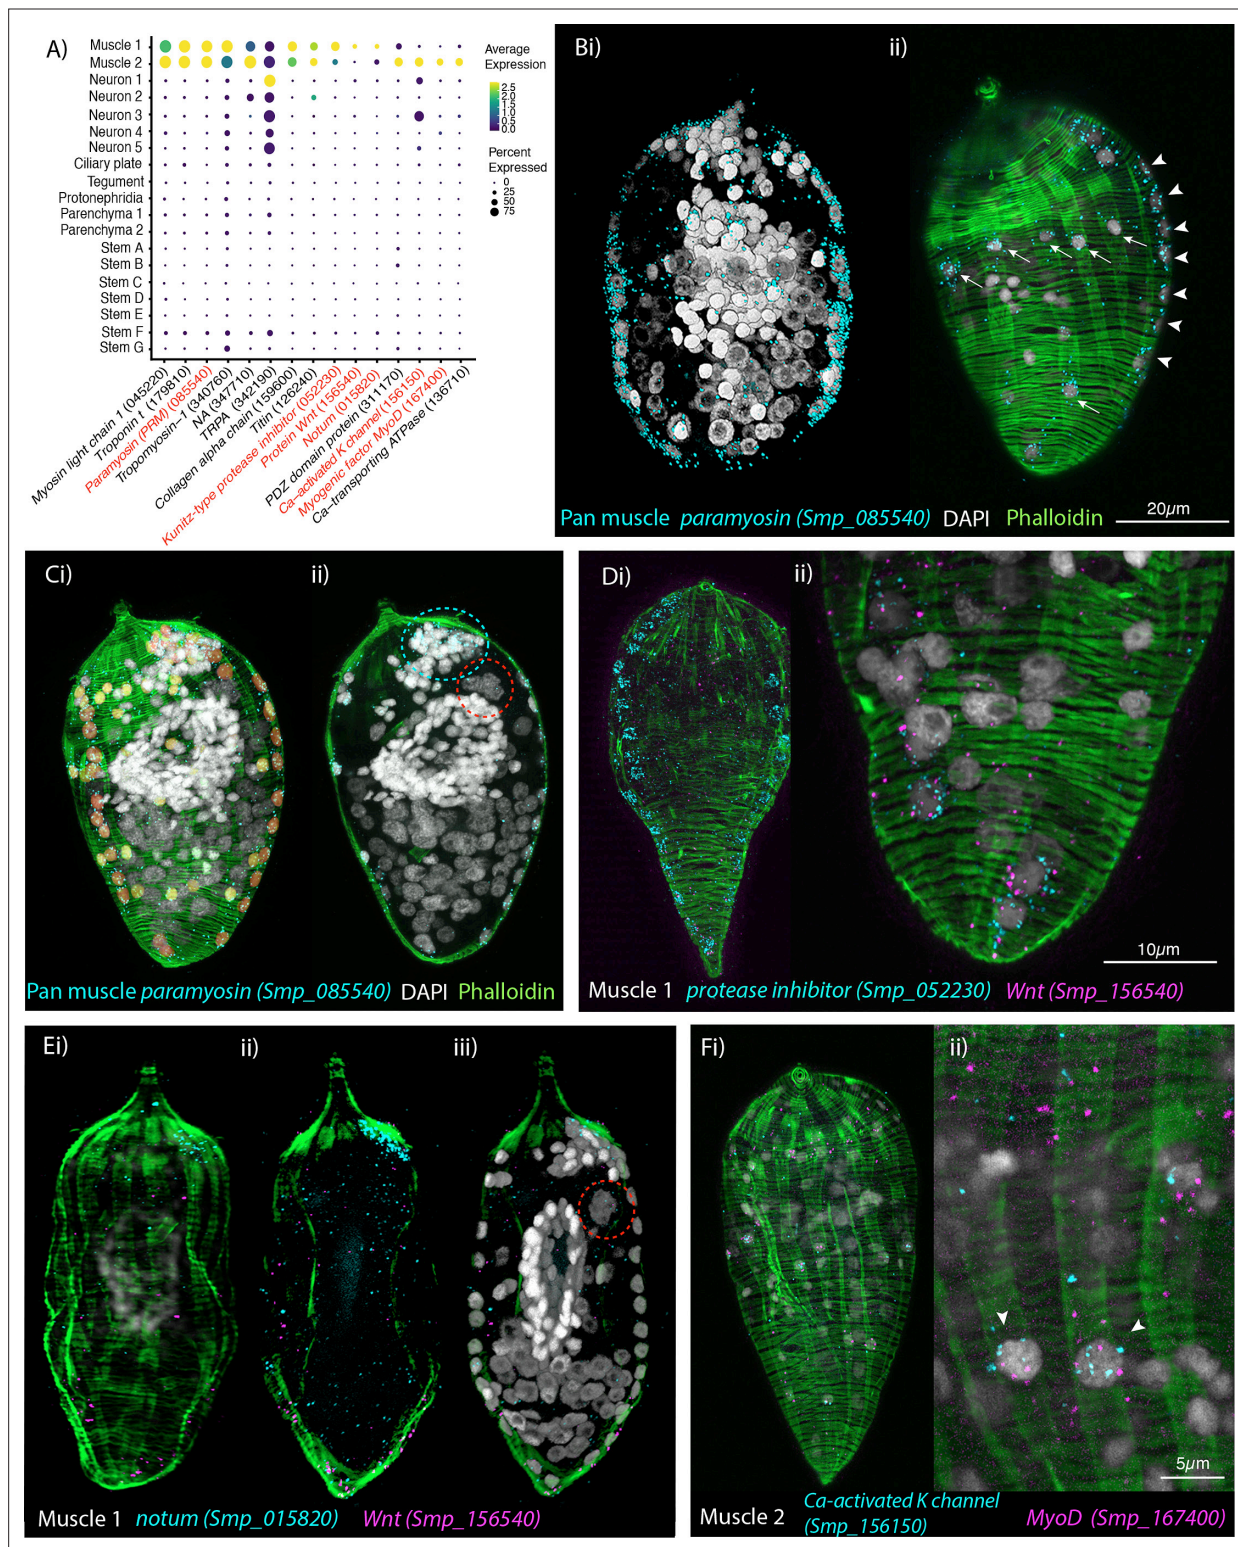

**Figure 2.** Orthogonal body wall muscles (BWMs) are transcriptionally distinct. **(A)** Dot plot depicting the expression profiles of specific or enriched marker genes in the two muscle clusters. Genes validated by in situ hybridisation (ISH) are marked in red. Gene identifiers shown in parenthesis but with 'Smp\_' prefix removed for brevity. Gene expression has been log-normalised and scaled using Seurat(v. 4.3.0). **(B, i, ii)** Wholemount ISH (WISH) of paramyosin *PRM*<sup>1</sup> and counterstaining with phalloidin reveals the nuclei of the circular BWMs, which form two distinct bilaterally symmetrical lines that run peripherally from the pole of the larva to the other (arrowheads in ii). The longitudinal BWM nuclei (ii – arrows) are spaced regularly between the lines of the circular BWM nuclei and their actin fibres run orthogally to the circular muscles. These patterns were seen in 100% of individuals

Figure 2 continued on next page

## Figure 2 continued

examined,  $n = 50$ . **(C, i)** Segmentation of the  $PRM^+$  cells in one miracidium shows 74 muscle cells in total: ~28 circular (segmented in orange), 33 longitudinal (yellow), and (ii) 13 in an anterior unilateral cluster (inside dashed cyan line) adjacent to the apical gland cell (identifiable by its four nuclei, inside dashed red circle). **(D)** Expression of markers for muscle 1 cluster; **(i)** *Kunitz-type protease inhibitor* is expressed in circular BWM and *wnt-11-1* is expressed in seven *Kunitz-type protease inhibitor*<sup>+</sup> cells at the posterior pole; **(ii)** close-up of posterior end of another miracidium showing the co-expression of *Kunitz-type protease inhibitor* and *wnt-11-1*. In 100% of individuals examined,  $n = 30$ . **(E, i–iii)** *Notum*, an inhibitor of *wnt* signalling, is expressed highly at the opposite pole to *wnt-11-1* in the cluster of 13 muscle nuclei adjacent to the apical gland cell (nuclei in dashed red circle). In 100% of individuals examined,  $n = 30$ . **(F)** Expression of markers for muscle 2 cluster; a *calcium-activated potassium channel* (*Smp\_156150*) and the transcription factor *myoD* (*Smp\_167400*) show co-expression in longitudinal BWMs (arrowheads). In 100% of individuals examined,  $n = 30$ . Scale shown in B also applies to C, Di, E, and Fi.



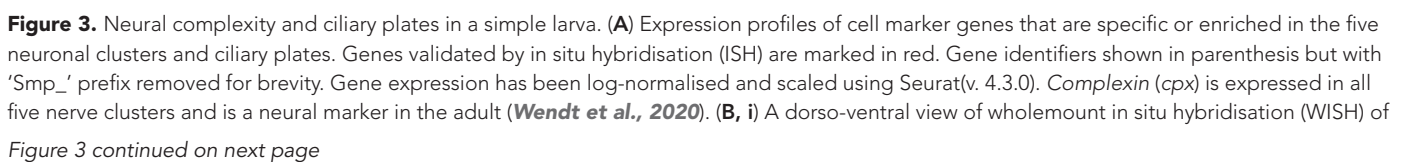

## Figure 3 continued

*cpx* shows expression in the brain, to the anterior – with projections around the three gland cells, and in two posterior clusters (100% of individuals examined,  $n = 50$ ). **(ii)** Segmentation of *cpx*<sup>+</sup> cells (in magenta) in one miracidium (lateral view) reveals that at least 209 of the 365 cells that make up the larva are neural and that the clusters of *cpx* cells that are located posterior to the brain, and send projections to the posterior pole, sit perpendicular to the circular muscle cell nuclei (blue dashed lines). **(C)** Multiplexed ISH for top markers for neuron 2 (NPP 43, Smp\_201600) and neuron 3 (NPP 26, Smp\_071050) shows expression in multiple cells of the brain, including cells adjacent to each other. NPP 26 (Smp\_071050) is also expressed in the apical gland cell (red dashed circle). 100% of individuals examined,  $n = 30$ . **(D)** The top marker for neuron 4, Smp\_319480, is expressed in four cells anteriorly (arrows) and ~22 that sit lateral and just posterior to the brain; these later cells send projections into the brain and out to the body wall at the latitude between the second and third tiers of ciliary plates **(iii)** seen here expressing the ciliary plate marker gene Smp\_096390. 100% of individuals examined,  $n > 30$ . **(E)** Neuron 5 marker Smp\_343710, an EF-hand domain-containing protein, is expressed in **(i)** 10–20 cells whose nuclei sit outside of, and anterior to, the brain, in and around the paired lateral glands and their secretory ducts, and **(Eii, iii, F)** in a pair of bilaterally symmetrical bulbous protrusions. 100% of individuals examined,  $n = 30$ . **(F)** Summary schematic of the in situ expression of marker genes for the neural cell clusters. **(G, i)** A top marker for ciliary plates, a calcium-binding protein (Smp\_096390), shows transcripts expressed in all the ciliary plates of all four tiers (brackets) and in six cells towards the anterior pole. **(ii, iii)** Counterstaining with phalloidin shows that the nuclei of these anterior cells sit beneath the body wall muscle and send a projection externally between the first and second tiers of ciliary plates (arrowheads). 100% of individuals examined,  $n > 30$ . Scale shown in B also applies to C, D, Ei, and Gi.

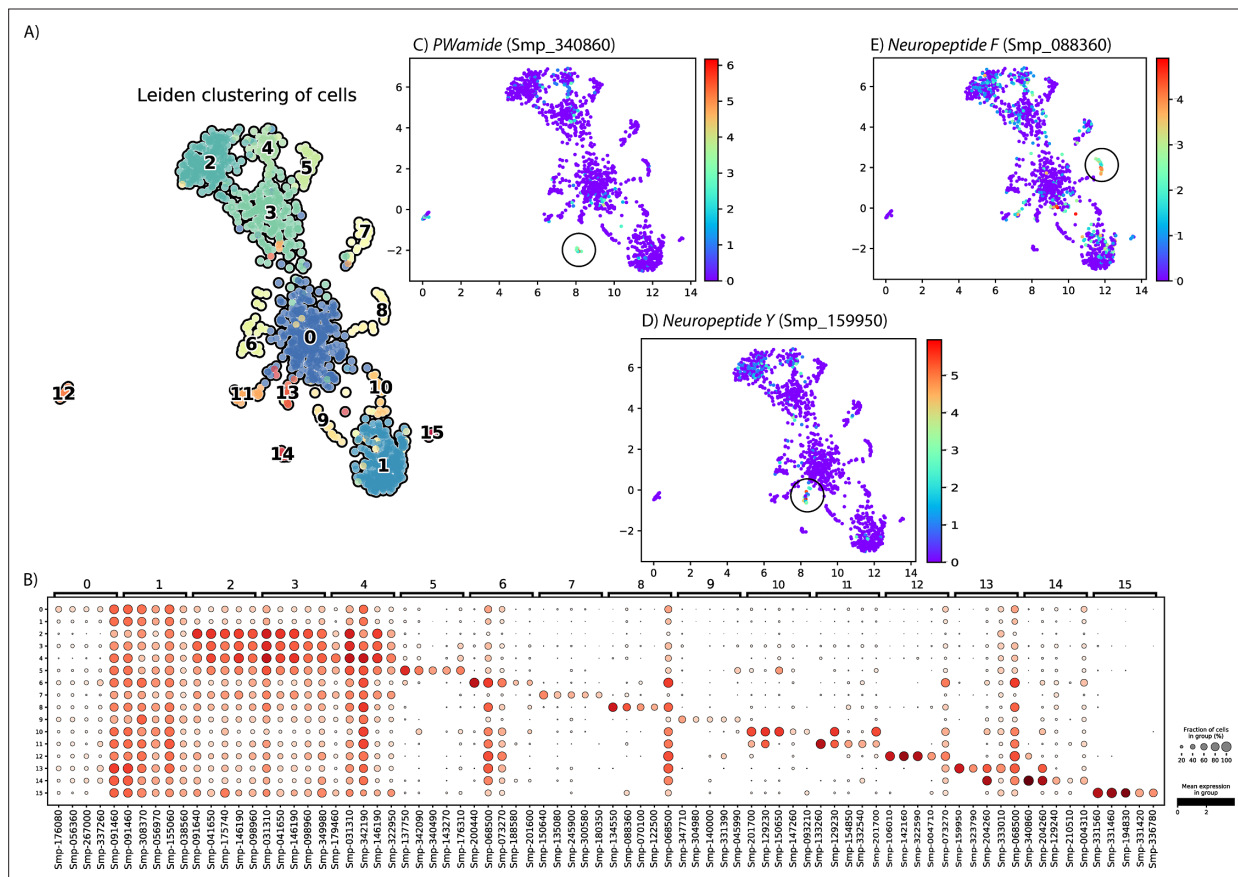

**Figure 3—figure supplement 1.** Subclustering the Neuron 1 cluster using self-assembling manifold (SAM) revealed multiple distinct subpopulations. **(A)** The Neuron 1 cluster was analysed using SAM algorithm, and Leiden clustering indicated 16 subpopulations. Library size was normalised and gene expression values were log-normalised using SAM (v1.0.1) and Scanpy (v1.8.2). **(B)** The top 5 marker genes for each of the subpopulations. **(C)** Expression of NPP PWamide, the top marker for subcluster 14. **(D)** Expression of neuropeptide Y, the top marker for subcluster 13. **(E)** Expression of neuropeptide F, the second top marker for subcluster 8. Although this cluster was difficult to define, this analysis suggests that there may be several small neural subpopulations within this cluster.

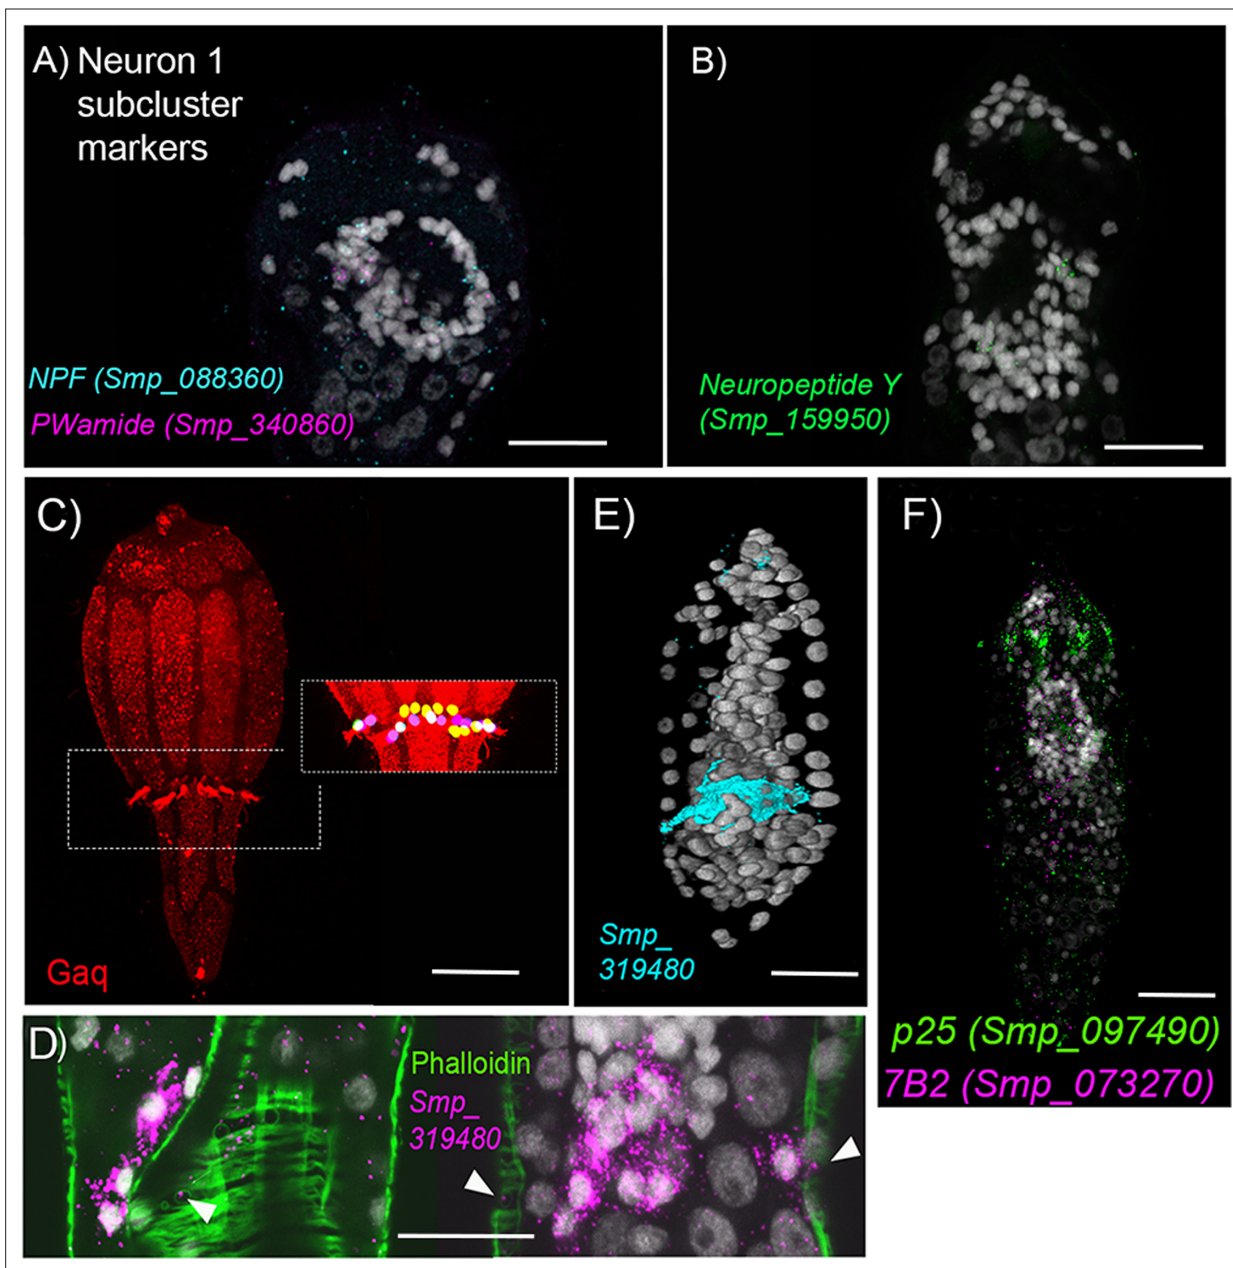

**Figure 3—figure supplement 2.** Neurons. (A, B) Top markers for cell cluster Neuron 1 include the neuropeptides precursor genes for Neuropeptide F, PWamide, and Neuropeptide Y. ISH of these genes shows expression in cells that make up the brain. (C) G-alpha-q antibody staining reveals a girdle of 23 multi-ciliated nerve endings that sit between the second and third tiers of ciliary plates. (D) Neuron 4 marker Smp\_319480 (putative mTORC1) transcripts are expressed at the base of these cilia; and (E) some transcripts also reach the nuclei of circular body wall muscles. (F) The expression of *p25 alpha* which is a marker for ciliated cells in adult worms, *Wendt et al., 2020* in the submuscular cells suggest that they may be ciliated. Scale bars = 20 μm.



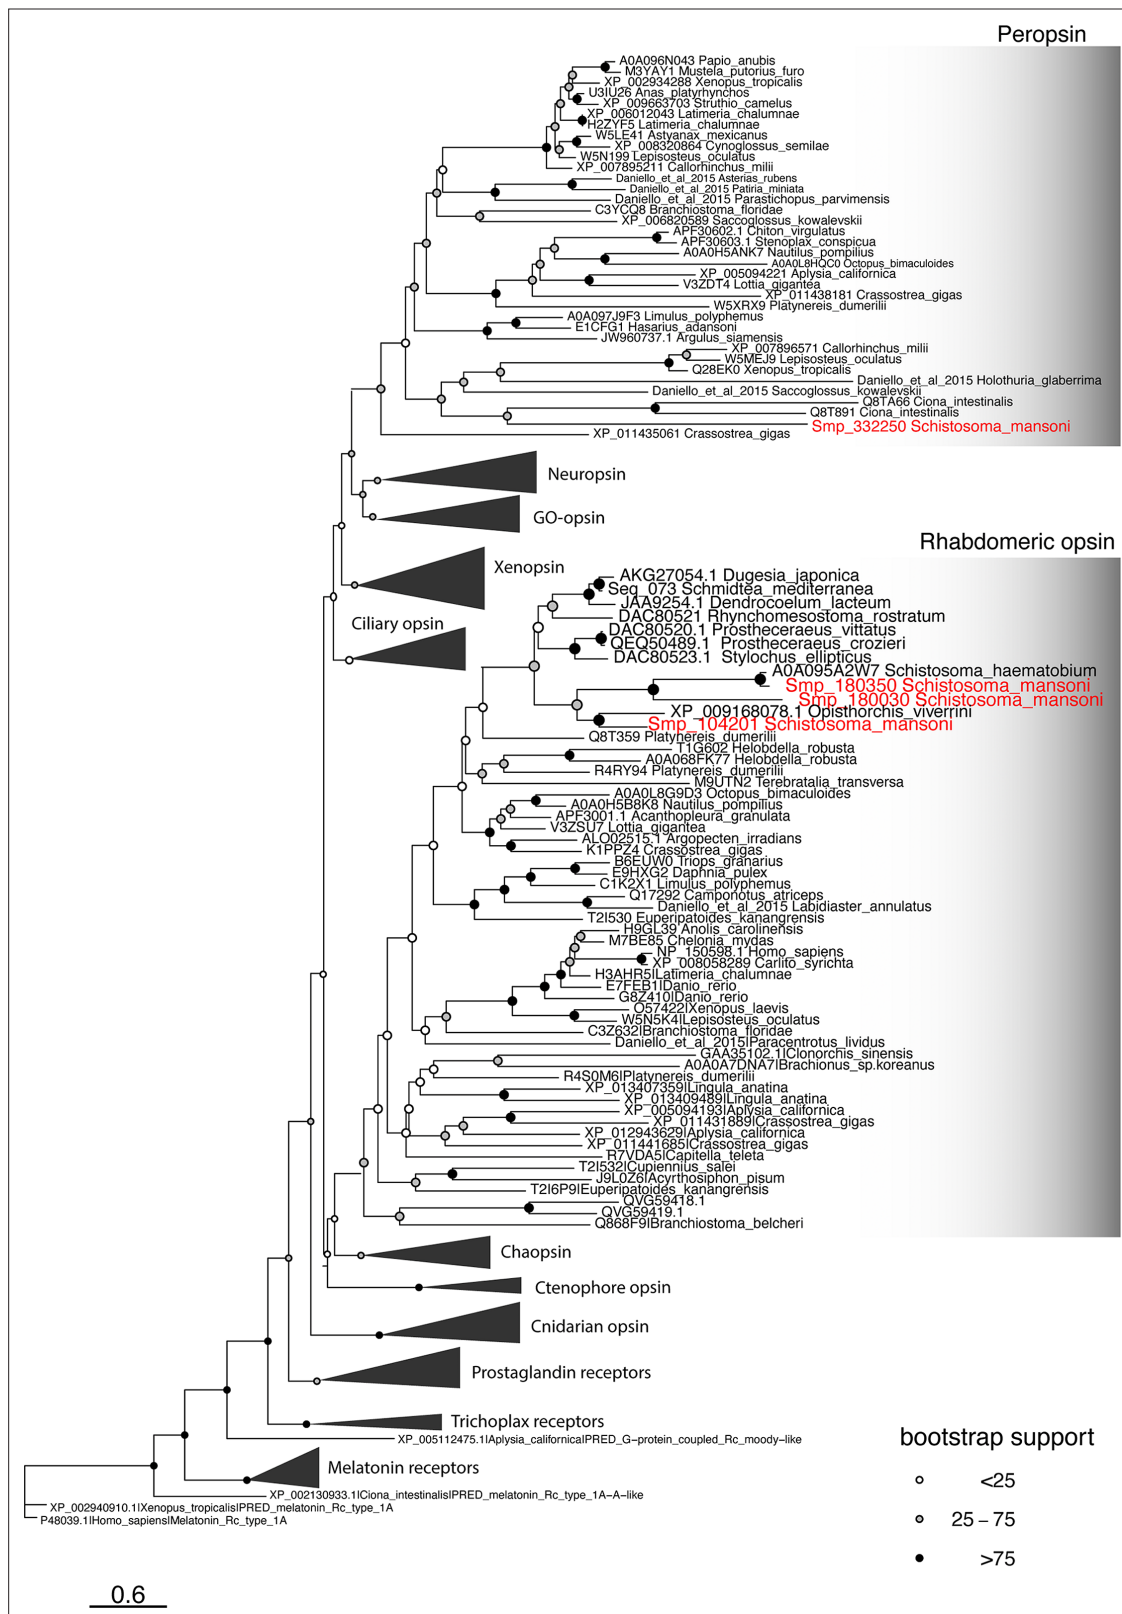

**Figure 3—figure supplement 3.** Phylogeny of metazoan opsins. There are four *Schistosoma mansoni* opsins that are expressed in two subclusters of Neuron 1; our analysis shows that three belong to the rhabdomeric opsin clade and the fourth is a peropsin. Scale bar shows branch lengths in expected amino acid substitutions per site. Shading of circles at internal nodes shows percentage support for the partition implied by that node from 1000 non-parametric bootstrap samples.

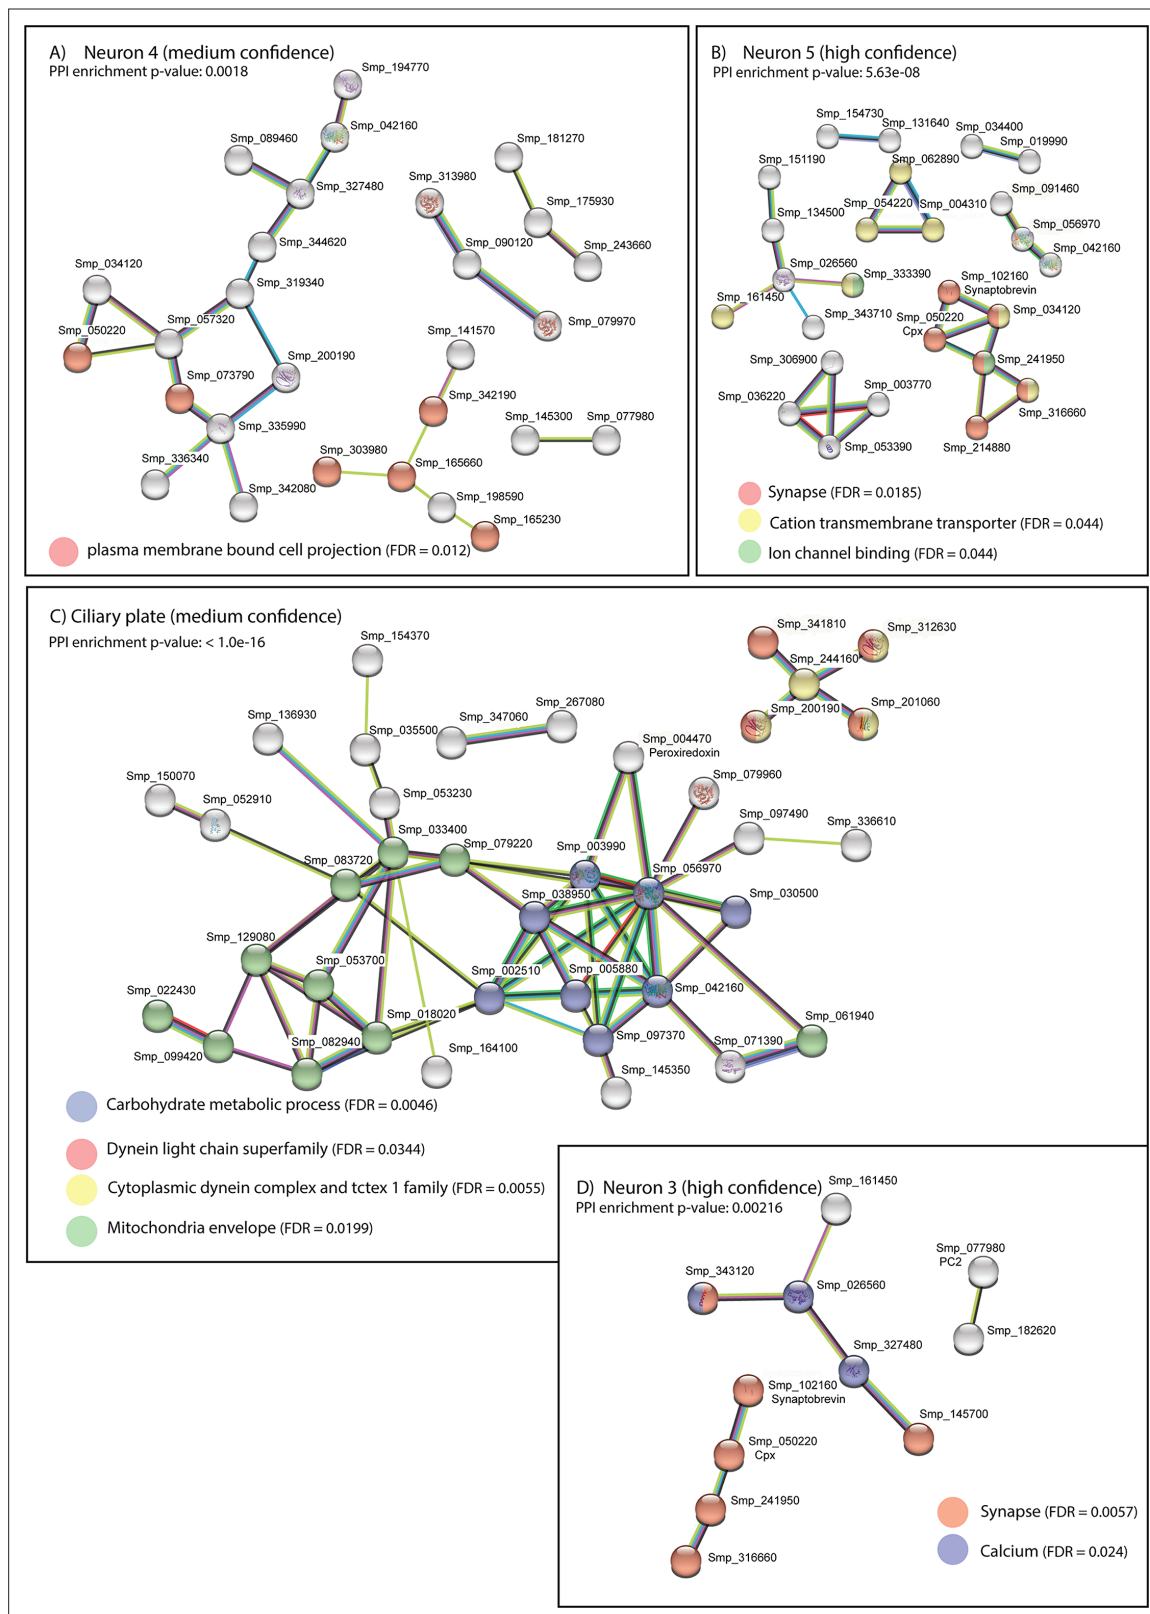

**Figure 3—figure supplement 4.** STRING analysis of neural clusters and ciliary plates. STRING analysis of the top 100 marker genes for each of the neural populations whose predicted networks have functional enrichment. (A) Neuron 4, (B) Neuron 5, (C) Ciliary plates, and (D) Neuron 3. Neuron 1 is not a defined cluster and Neuron 2 showed no functional enrichment. Lines (edges) connecting nodes are based on evidence of the function of homologues. Functional enrichment (FDR = false discovery rate) as provided by STRING (PPI = predicted protein interaction). Minimum interaction (confidence) score of 0.7, corresponding to a high level of confidence, 0.4 medium level of confidence.

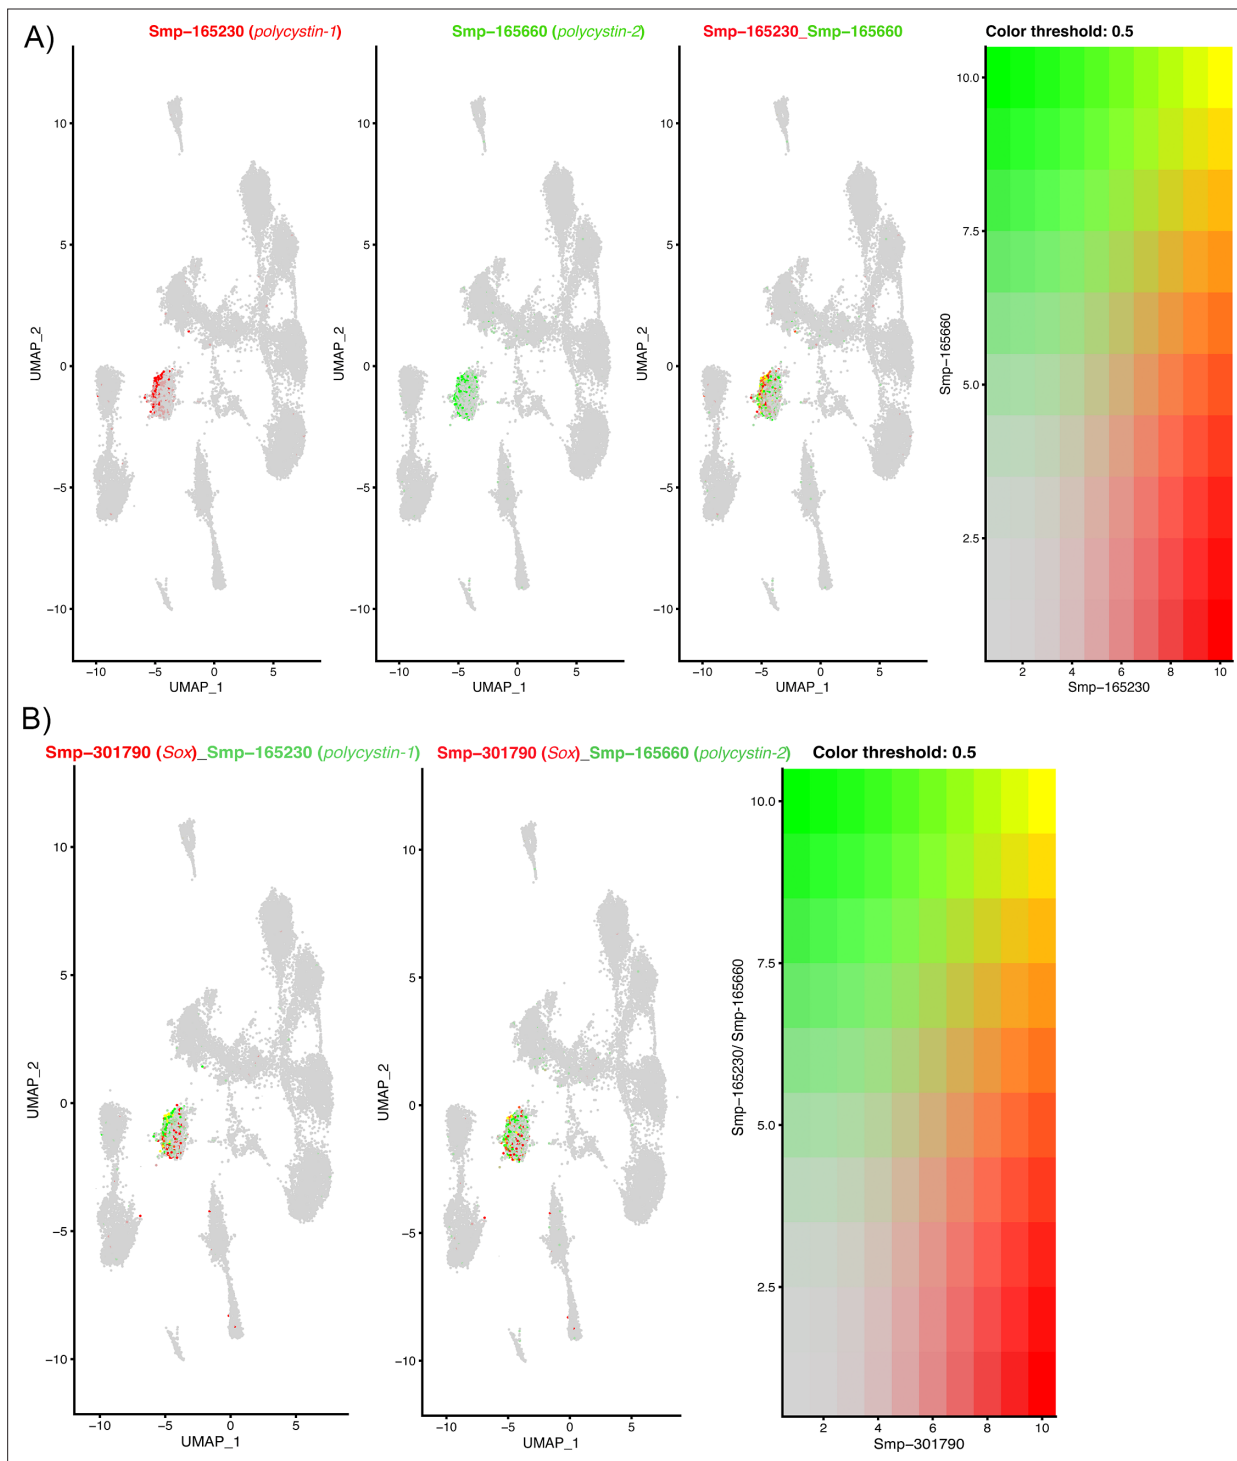

**Figure 3—figure supplement 5.** The expression of two polycystin genes and a Sox transcription factor in Neuron 4 cells. **(A)** Polycystins 1 and 2 are co-expressed in Neuron 4 cells, orthologues in other animals form heterodimers in ciliated cells that function to detect flow shear and vibrations (Kim *et al.*, 2016; Bezares-Calderón *et al.*, 2018). Gene expression has been log-normalised and scaled using Seurat(v. 4.3.0). **(B)** In planaria, a transcription factor Sox B1-2 regulates polycystin genes and together function in sensory neurons that detect flow. The co-expression of polycystin genes with a Sox transcription factor in Neuron 4 cells indicates that this transcription factor may regulate these polycystin genes in the miracidium.

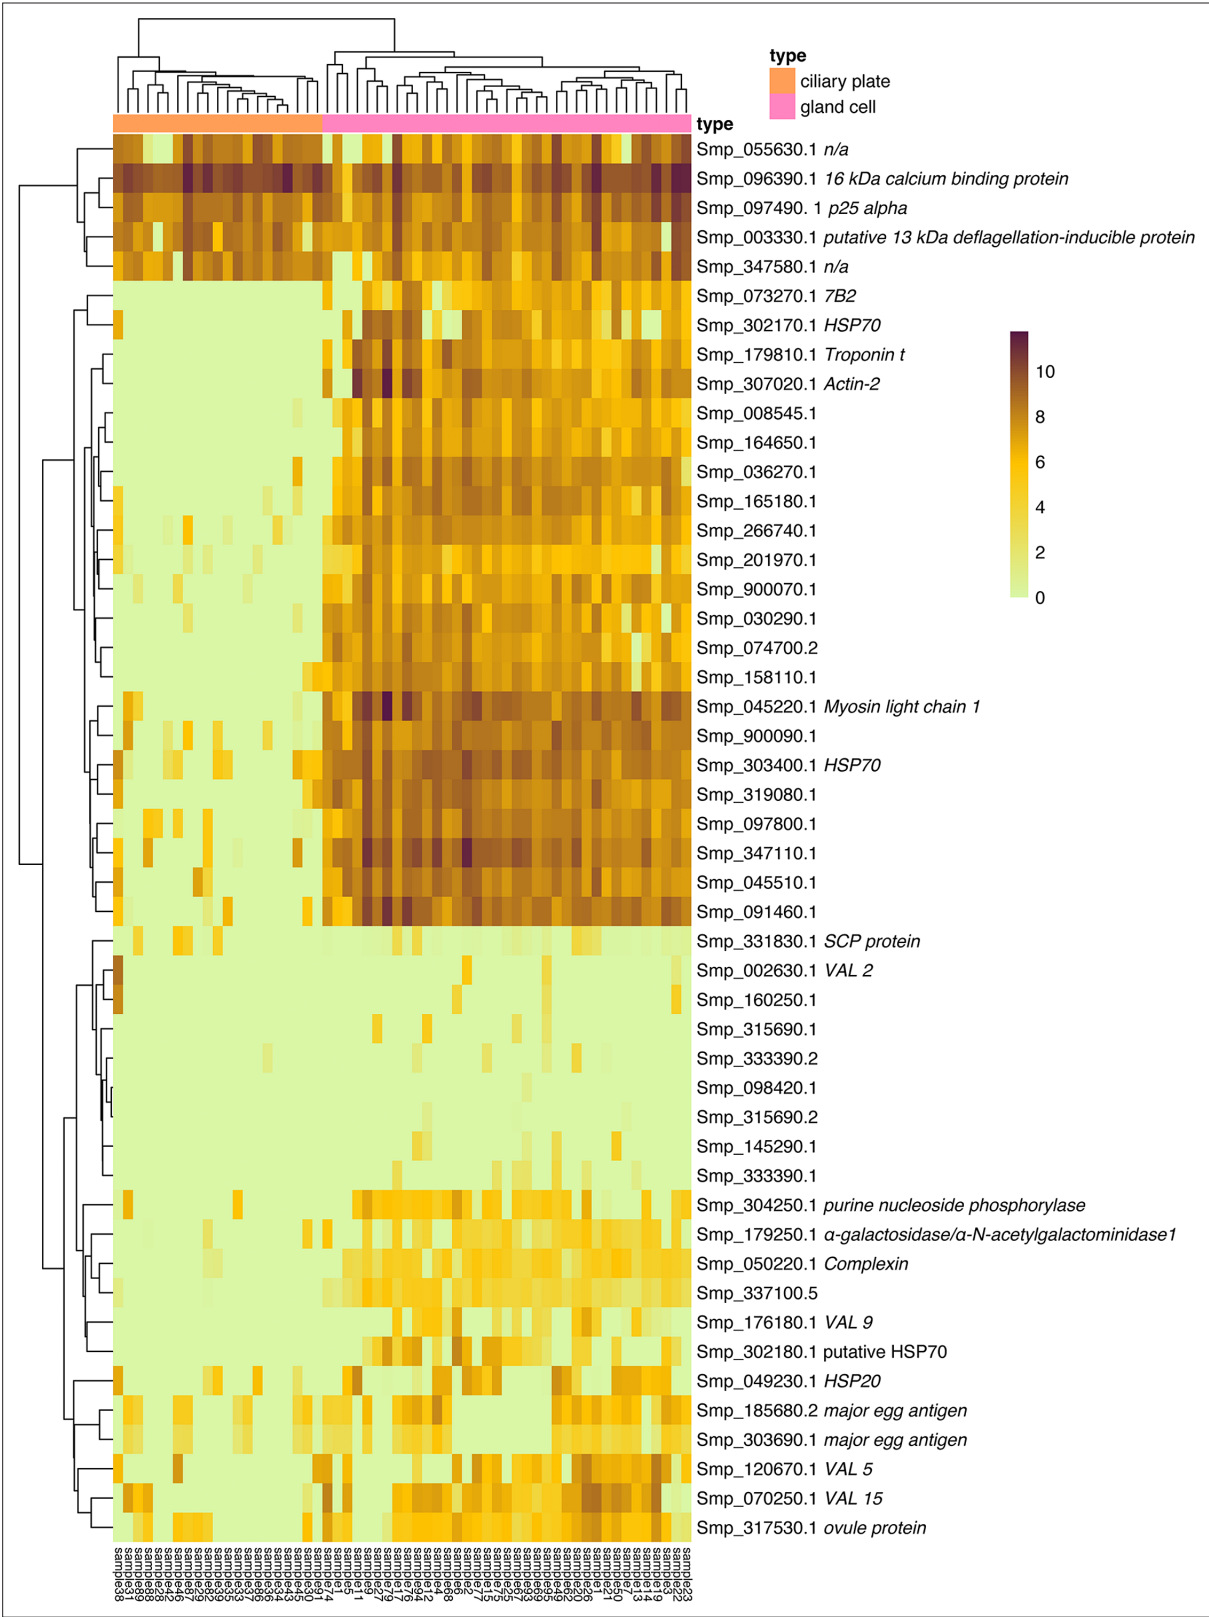

**Figure 3—figure supplement 6.** Gene expression by transcripts per million in the ciliary plates and gland cells. Heatmap showing the gene expression, by transcripts per million, detected in the ciliary plates and gland cells hand-picked for plate-based single-cell RNA sequencing (scRNA-seq). Genes included: the top 20 significant genes between gland cell and ciliary plates, two neural markers, five VAL genes, five significant genes between gland cells and other cells, eight genes previously reported to produce secreted proteins in the miracidia (Wang et al., 2016; Wu et al., 2009), and five top marker genes from the ciliary plate cluster.



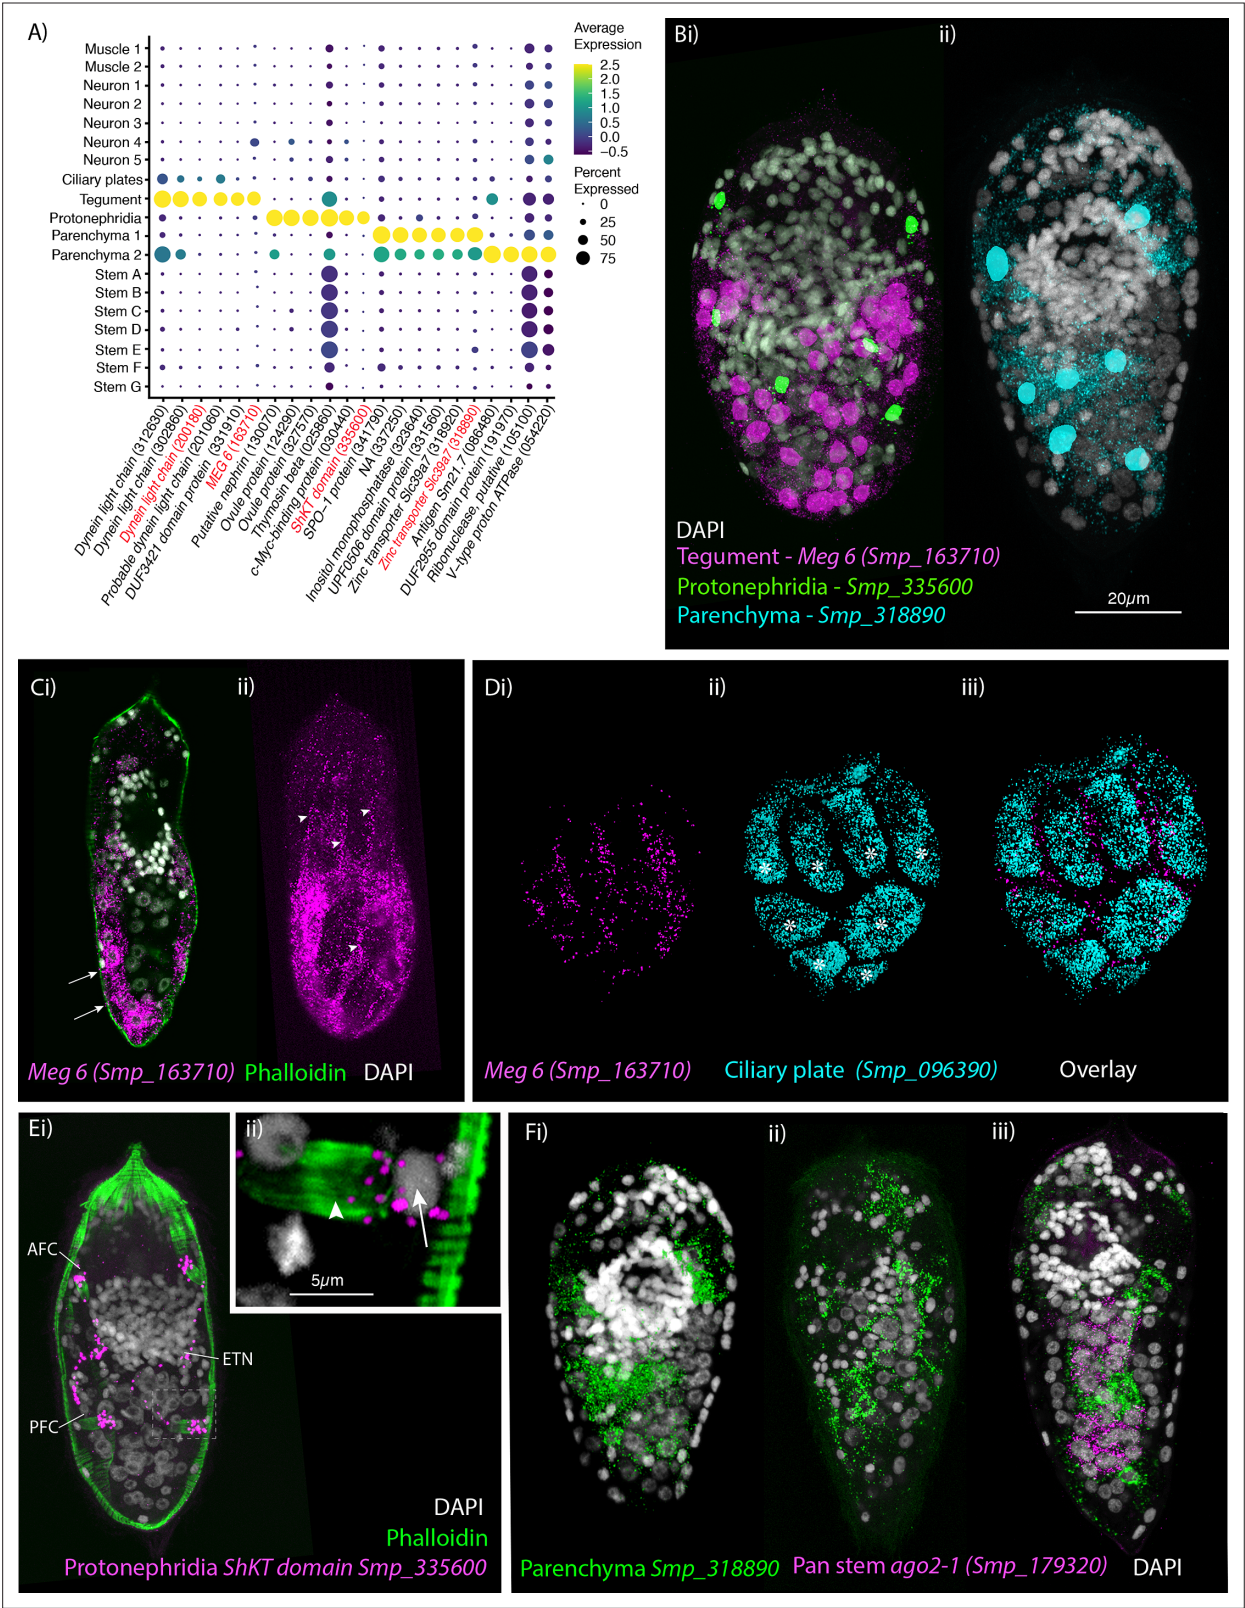

**Figure 4.** Identification of the tegument, protonephridia, parenchymal cells in the miracidium. **(A)** Expression profiles of cell marker genes specific or enriched in these cell-type clusters. Genes validated by in situ hybridisation are in red. Gene identifiers shown in parenthesis but with ‘Smp\_’ prefix removed for brevity. Gene expression has been log-normalised and scaled using Seurat(v. 4.3.0). **(B)** Segmentation of nuclei of the cells expressing the marker genes for: (i) protonephridia and tegument (multiplexed) show that six cells express Smp\_335600 (ShKT-domain protein, a marker for

Figure 4 continued on next page

## Figure 4 continued

protonephridia), 46 cells express *Meg-6* (a marker for tegument) (segmentation of 1 larva), and **(ii)** seven cells that express an uncharacterised gene, *Smp\_318890* (a marker for parenchymal cells)(segmentation of 1 larva). **(C, D)** The tegument marker *Meg-6* shows expression around nuclei in the posterior two-thirds of the larvae. The nuclei are below the body wall muscle, and cytoplasmic protrusions reach between muscle filaments (arrows) and form the epidermal ridges (arrowheads) between the ciliary plates (which are visible in **Dii, iii** expressing the ciliary plate marker *Smp\_096390*) (asterisks). 100% of individuals examined,  $n > 30$ . **(E)** The protonephridial marker *Smp\_335600* shows 'S'-shaped expression with transcripts extending from the nucleus of the anterior flame cell (AFC) along the excretory tubule and its nucleus (ETN) to the posterior flame cell (PFC), **(Eii)** it is expressed around the nuclei (arrow) rather than the barrels (arrowhead) of the flame cells. 100% of individuals examined,  $n > 30$ . **(Fi)** The pan-parenchymal marker, *Smp\_318890*, was expressed in two anterior cells (one on either side of the brain) and five to seven cells posterior to the brain. **(Fii)** These cells have long cytoplasmic protrusions that reach between all the other cells, **(Fiii)** including the *ago2-1<sup>+</sup>* stem cells. 100% of individuals examined,  $n > 30$ . Scale shown in B also applies to C, D, Ei, and F.

**A) Tegument**

(high confidence)

PPI enrichment p-value:  $< 1.0 \times 10^{-16}$ 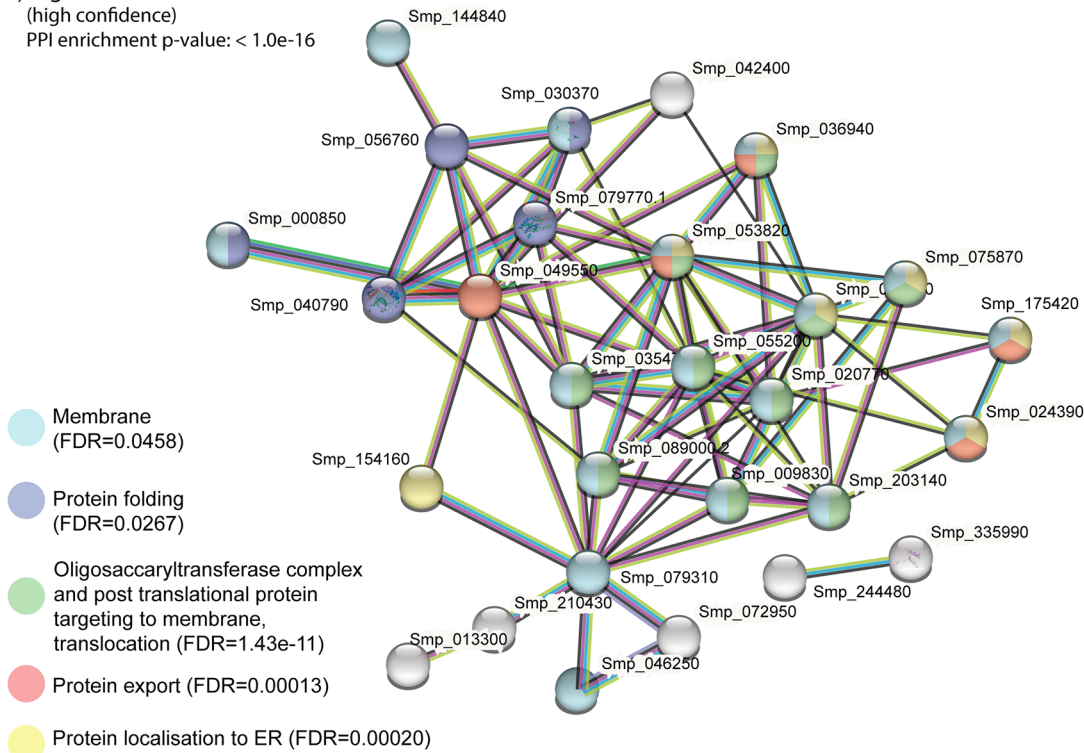**B) Protonephridia (high confidence)**PPI enrichment p-value:  $4.43 \times 10^{-5}$ 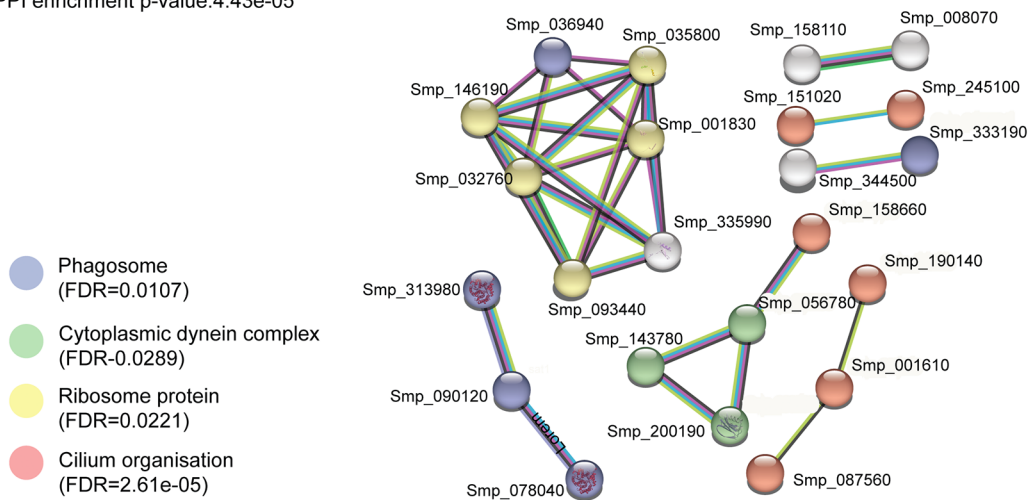

**Figure 4—figure supplement 1.** STRING analysis of tegument and protonephridia clusters. STRING analysis of the top 100 marker genes for (A) tegument and (B) protonephridia. Lines (edges) connecting nodes are based on evidence of the function of homologues. Functional enrichment (FDR) as provided by STRING (PPI = predicted protein interaction). Minimum interaction (confidence) score of 0.7, corresponding to a high level of confidence, 0.4 medium level of confidence.



**A) Parenchyma 1 (high confidence)**

PPI enrichment  
p-value:  $6.32 \times 10^{-13}$

- Metabolic pathways (FDR= $4.85 \times 10^{-7}$ )
- Hydrolase (FDR=0.0413)
- Carbohydrate metabolic process (FDR= $3.39 \times 10^{-7}$ )

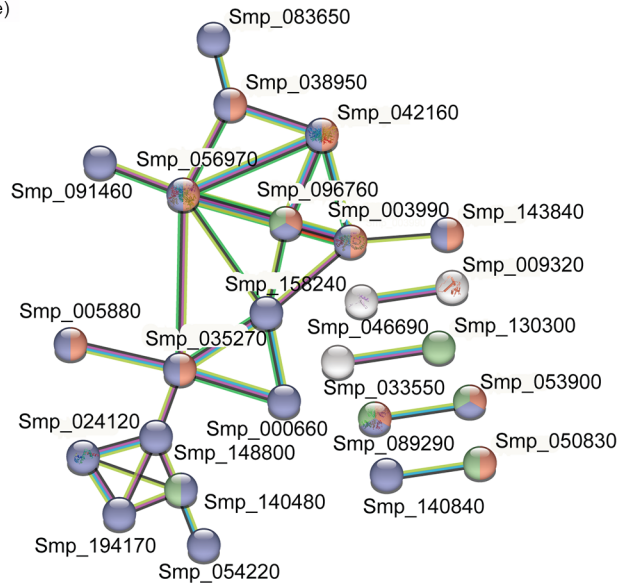**B) Parenchyma 2 (high confidence)**

PPI enrichment  
p-value:  $< 1.0 \times 10^{-16}$

- Phagosome (FDR=0.00032)
- mTOR signalling pathway (FDR=0.0384)
- Generation of precursor metabolites and energy (FDR=0.0010)
- Mitochondrial inner membrane, proton-transporting two sector atpase complex (FDR= $6.37 \times 10^{-8}$ )

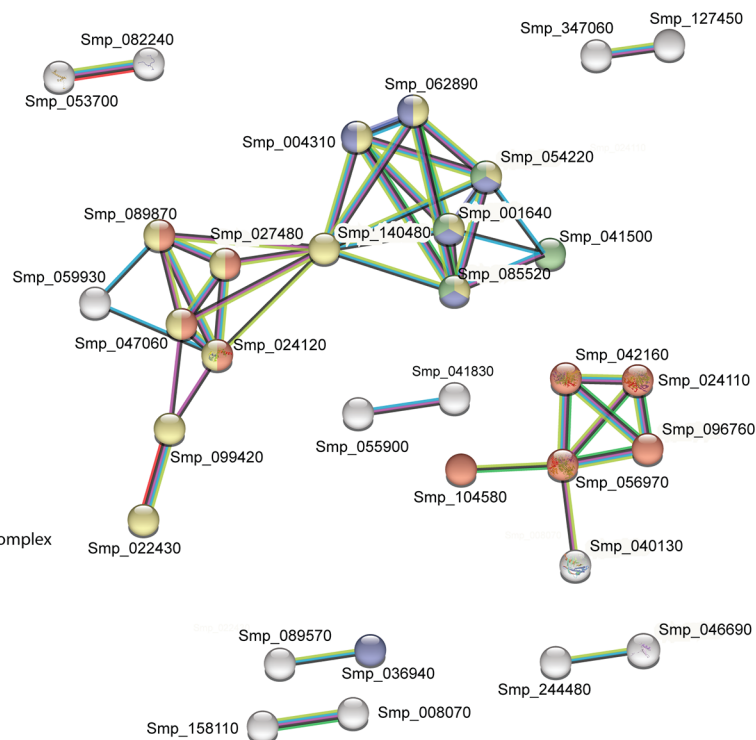

**Figure 4—figure supplement 2.** STRING analysis of parenchyma clusters. STRING analysis of the top 100 marker genes for **(A)** Parenchyma 1 and **(B)** Parenchyma 2. Lines (edges) connecting nodes are based on evidence of the function of homologues. Functional enrichment (FDR) as provided by STRING (PPI = predicted protein interaction). Minimum interaction (confidence) score of 0.7, corresponding to a high level of confidence, 0.4 medium level of confidence.

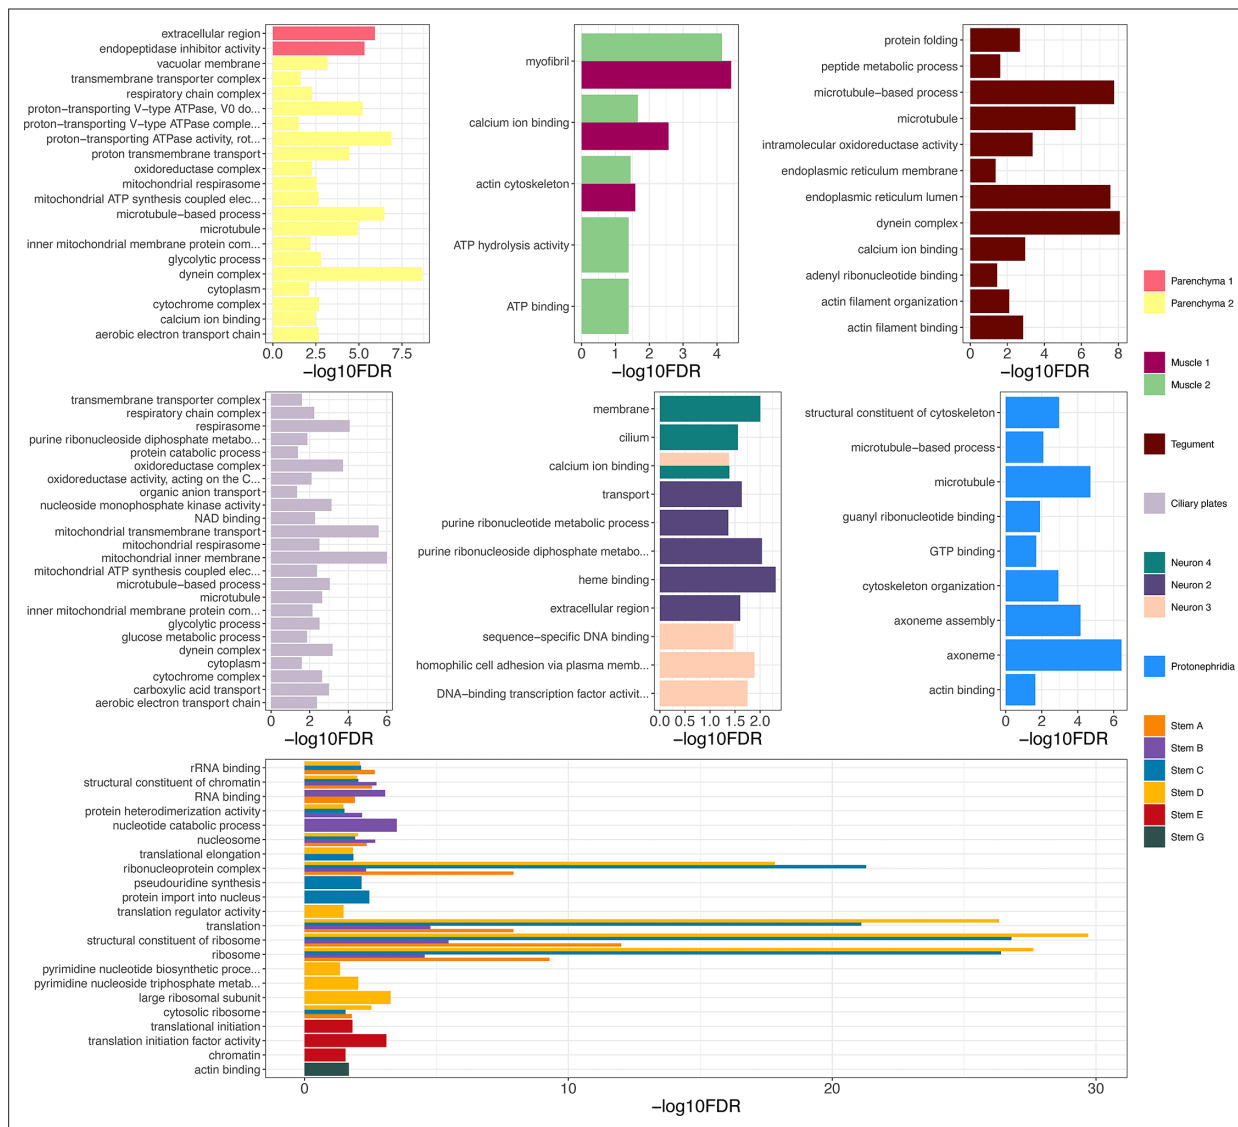

**Figure 4—figure supplement 3.** Gene ontology (GO) analysis of marker genes identified in the miracidia cell clusters. GO analysis was performed on each cluster using genes with a minimum area under curve (AUC) score of 0.7. Enriched biological process (BP) GO terms are shown for each cluster, and have been filtered to only show terms supported by a minimum of two genes. Top panels (left to right) show parenchyma, muscle, and tegument clusters, middle panels (left to right) show ciliary plate, neuron, and protonephridia clusters, and the bottom panel shows stem clusters. Full list of GO terms available in [Supplementary file 1g](#).

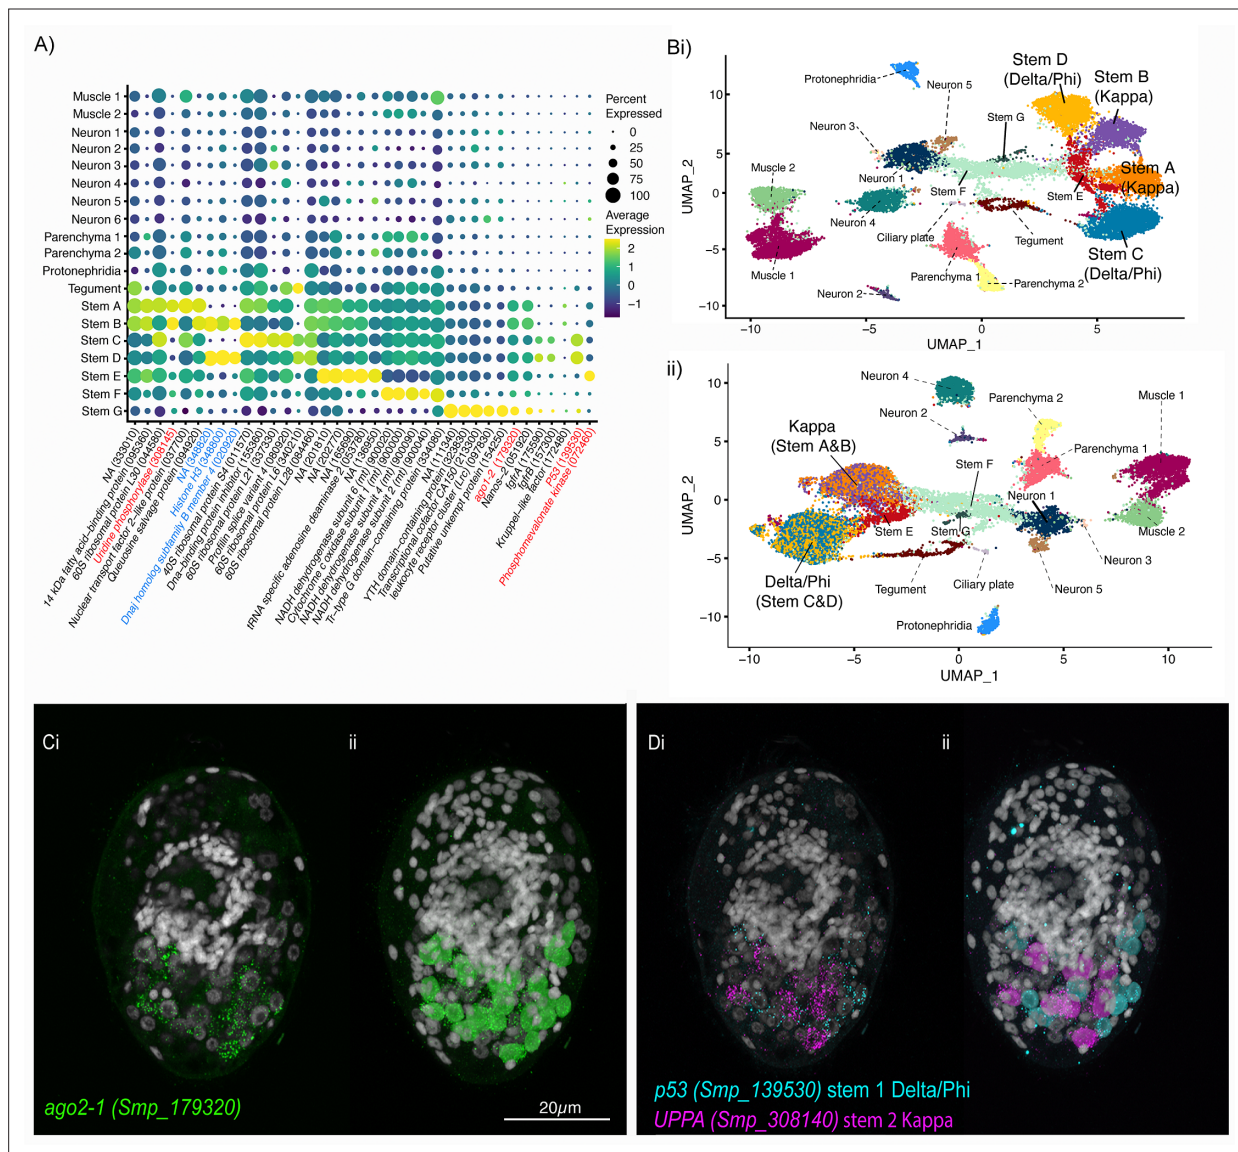

**Figure 5.** Two defined populations of stem cells cluster by sex. **(A)** Expression profiles of cell marker genes that are specific or enriched in the stem cell clusters. Genes specific to the W (female-specific) sex chromosome are highlighted in blue. Genes validated by ISH are marked in red. Gene identifiers shown in parenthesis but with 'Smp\_' prefix removed for brevity. Gene expression has been log-normalised and scaled using Seurat(v. 4.3.0). **(Bi)** UMAP including all genes shows that there are two Delta/Phi and two Kappa stem clusters, **(ii)** UMAP showing that removal of all genes specific to the W and Z sex chromosomes results in one Delta/Phi and one Kappa cluster, indicating that the stem cells are transcriptionally different in male and female miracidia due to the expression of sex-linked genes. **(C, D)** Multiplexed ISH showing three stem cell markers simultaneously in the same individual: *ago2-1* (Smp\_179320) (pan-stem), *p53* (Smp\_139530) (Delta/Phi), and *Uridine phosphorylase A* (*UPPA*, Smp\_308140) (Kappa). **(Ci)** *Ago2-1* expression reveals stem cells lateral and posterior to the brain (Optical section). 100% of individuals examined,  $n > 30$ . **(ii)** MIP with segmentation of the 23 *ago2-1*<sup>+</sup> cells. **(Di)** *P53* and *UPPA* expression shows the two stem cell populations intermingled in 100% of individuals examined,  $n > 30$ . **(ii)** MIP and segmentation reveal there are more *p53*<sup>+</sup> cells than *UPPA*<sup>+</sup> cells (in this larva, 15 are *p53*<sup>+</sup> and 9 are *UPPA*<sup>+</sup>). Scale shown in C also applies to D.

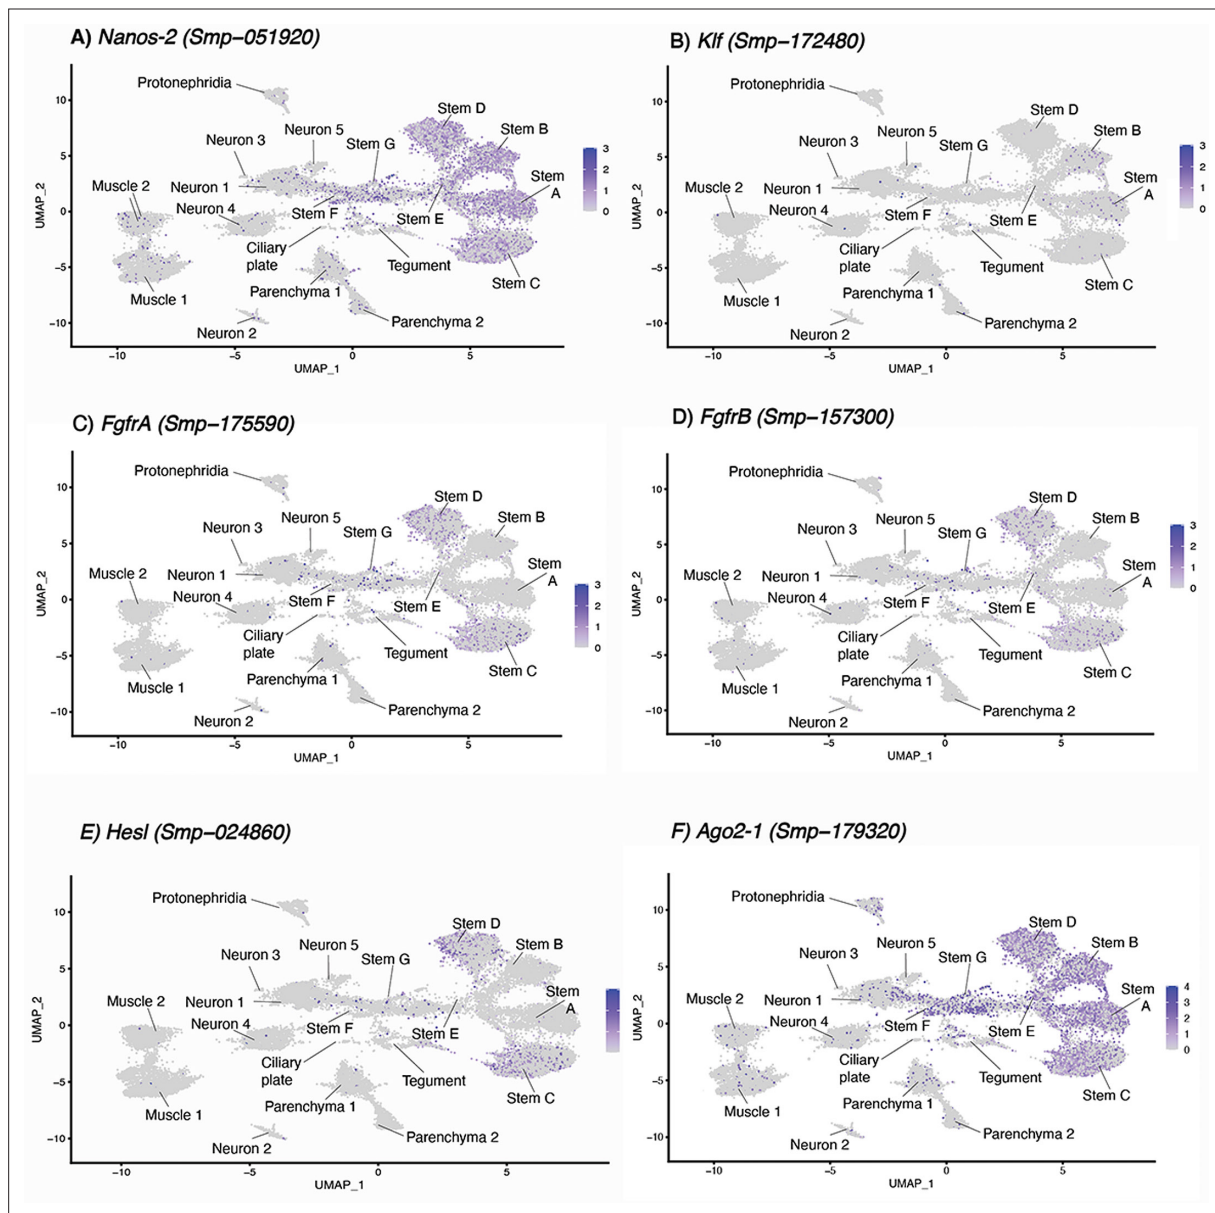

**Figure 5—figure supplement 1.** Expression of known stem cell markers in miracidia cells. (A–F) Three stem cell classes were identified in the mother sporocyst stage and were named based upon their respective markers: Kappa (*klf*<sup>+</sup>, *nanos-2*<sup>+</sup>), Delta (*nanos-2*<sup>+</sup> and *fgfrA*<sup>+</sup>, *fgfrB*<sup>+</sup> and *nanos-2*<sup>+</sup>) and Phi (*fgfrA*<sup>+</sup> and *fgfrB*<sup>+</sup> and *hesl*<sup>+</sup>), as well as pan-stem marker *ago2-1* (Wang et al., 2018; Nanes Sarfati et al., 2021). In the miracidium, we identified seven stem cell clusters by expression of *ago2-1*: Stems A and B are *klf*<sup>+</sup> and *nanos-2*<sup>+</sup> (i.e. Kappa-like), Stems C and D are *nanos-2*<sup>+</sup>, *fgfrA*<sup>+</sup>, *fgfrB*<sup>+</sup>, and *hesl*<sup>+</sup> (i.e. they resembled both Delta and Phi). Gene expression has been log-normalised and scaled using Seurat(v. 4.3.0).



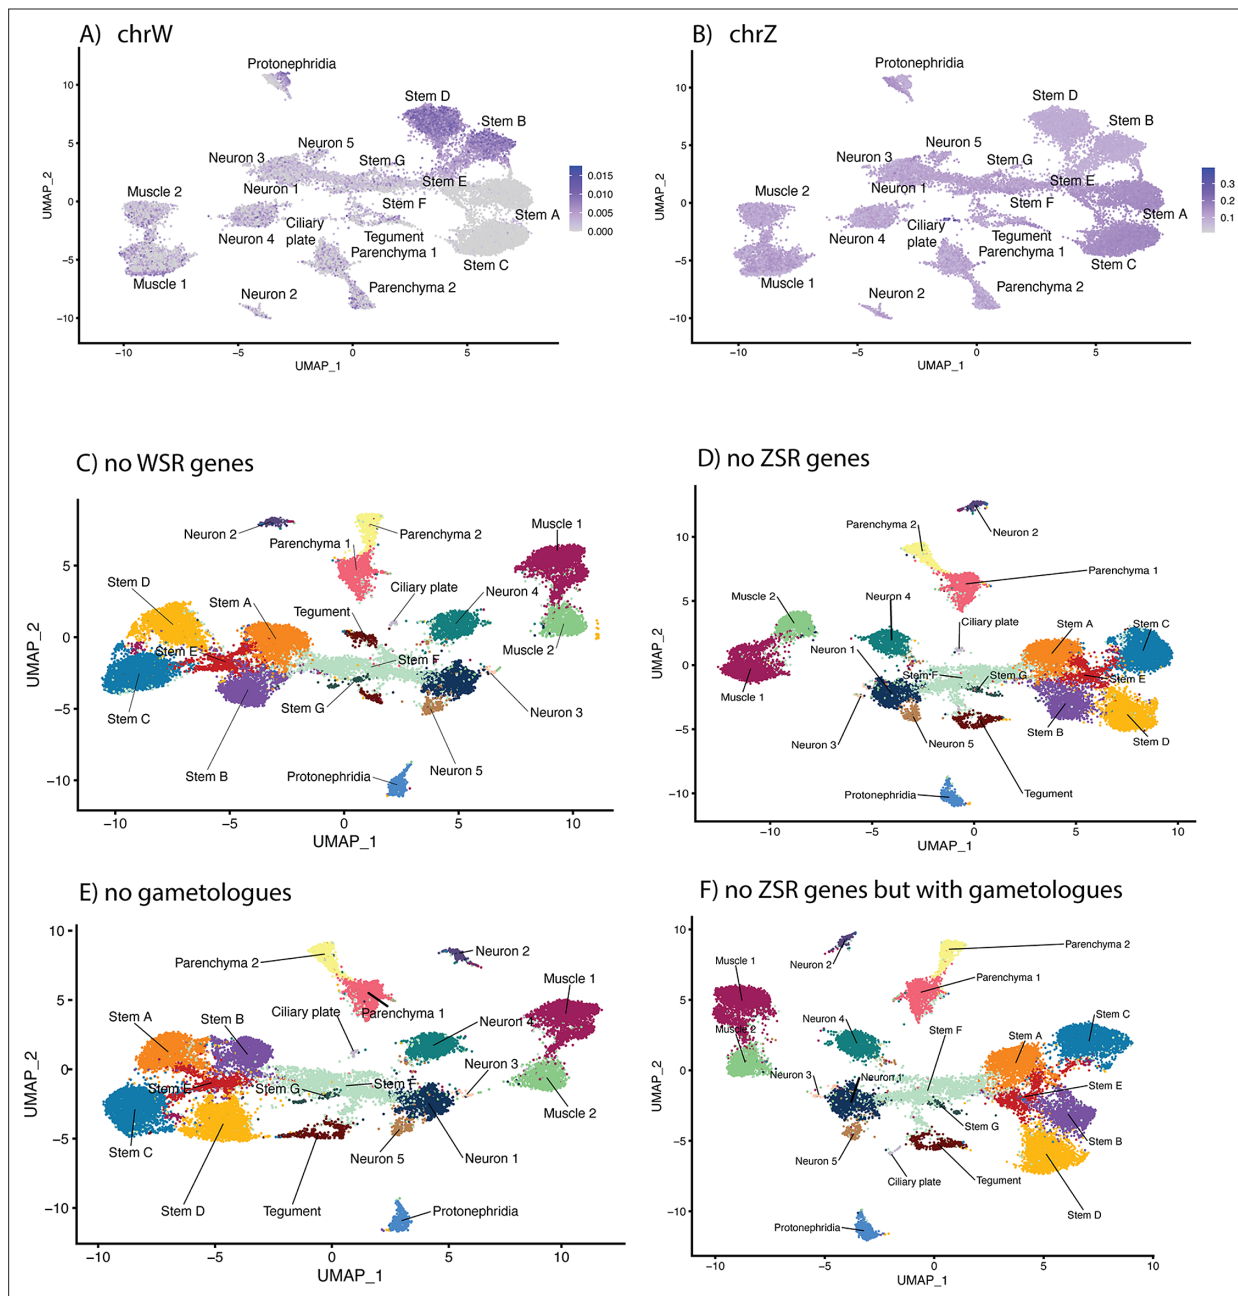

**Figure 5—figure supplement 2.** The effect of sex-linked genes on cell clustering. *Schistosoma mansoni* has seven pairs of autosomes and one pair of sex chromosomes; males have ZZ and females have ZW (Buddenborg et al., 2021). The sex chromosomes are composed of sex-specific regions that are unique to each chromosome flanked by pseudoautosomal regions that are common to both Z and W. The W-specific region (WSR) is a large, highly repetitive region that contains 38 genes, most of which are gametologs (genes with homologous copies on the WSR and Z-specific region [ZSR]). The ZSR contains 941 genes, of which only 35 are gametologs. The proportion of reads mapping to the WSR and ZSR across all cell-type clusters shows (A) putative male cells (Stems A and C i.e. those that lack WSR gene expression) and (B) evidence of incomplete ZSR gene dosage compensation in the male stem cells. (C) To determine whether any of the WSR genes were responsible for the clustering pattern, we excluded them from the mapping reference. The impact on the overall UMAP clustering was minimal. We repeated this excluding the (D) ZSR genes, (E) gametologues, and (F) ZSR genes, except the gametologues, in turn. In all four scenarios, the stem cell clusters remained separated by sex. ZSR or WSR expression is therefore sufficient on their own to split these stem clusters in two.

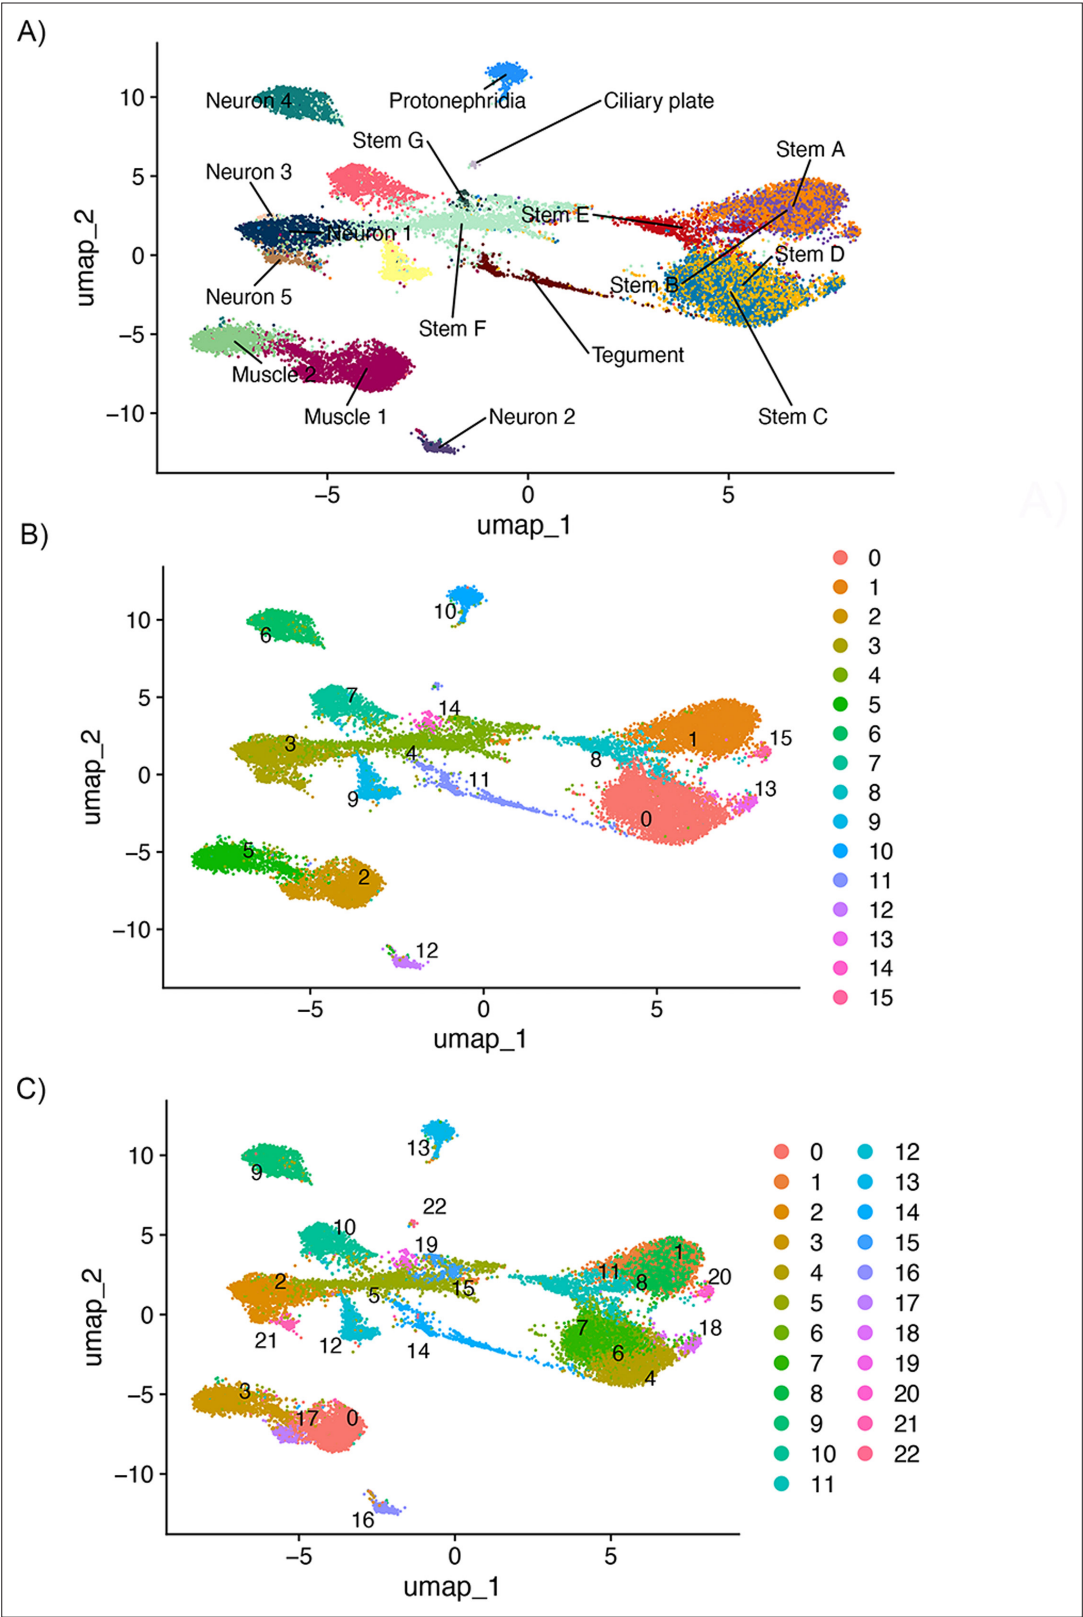

**Figure 5—figure supplement 3.** Identification of new clusters after removing Z-specific region (ZSR) and W-specific region (WSR) genes. To identify whether stem cell clusters A and B, and C and D, still split down A/B and C/D lines despite the apparent collapsing of clusters after removing ZSR and WSR genes, we ran de novo clustering at several resolutions. Even once clusters were oversplitting, there was not a separation between stem

Figure 5—figure supplement 3 continued on next page

*Figure 5—figure supplement 3 continued*

cluster A/B and C/D. This was run using Seurat(v5.0.2), so the overall topology is not identical to that shown in **Figure 5**, though the same number of principal components (PCs) is used. **(A)** Shows the UMAP topology labelled by original cluster ID, **(B)** shows the de novo clusters at resolution = 0.6, and **(C)** shows the de novo clusters at resolution = 1.



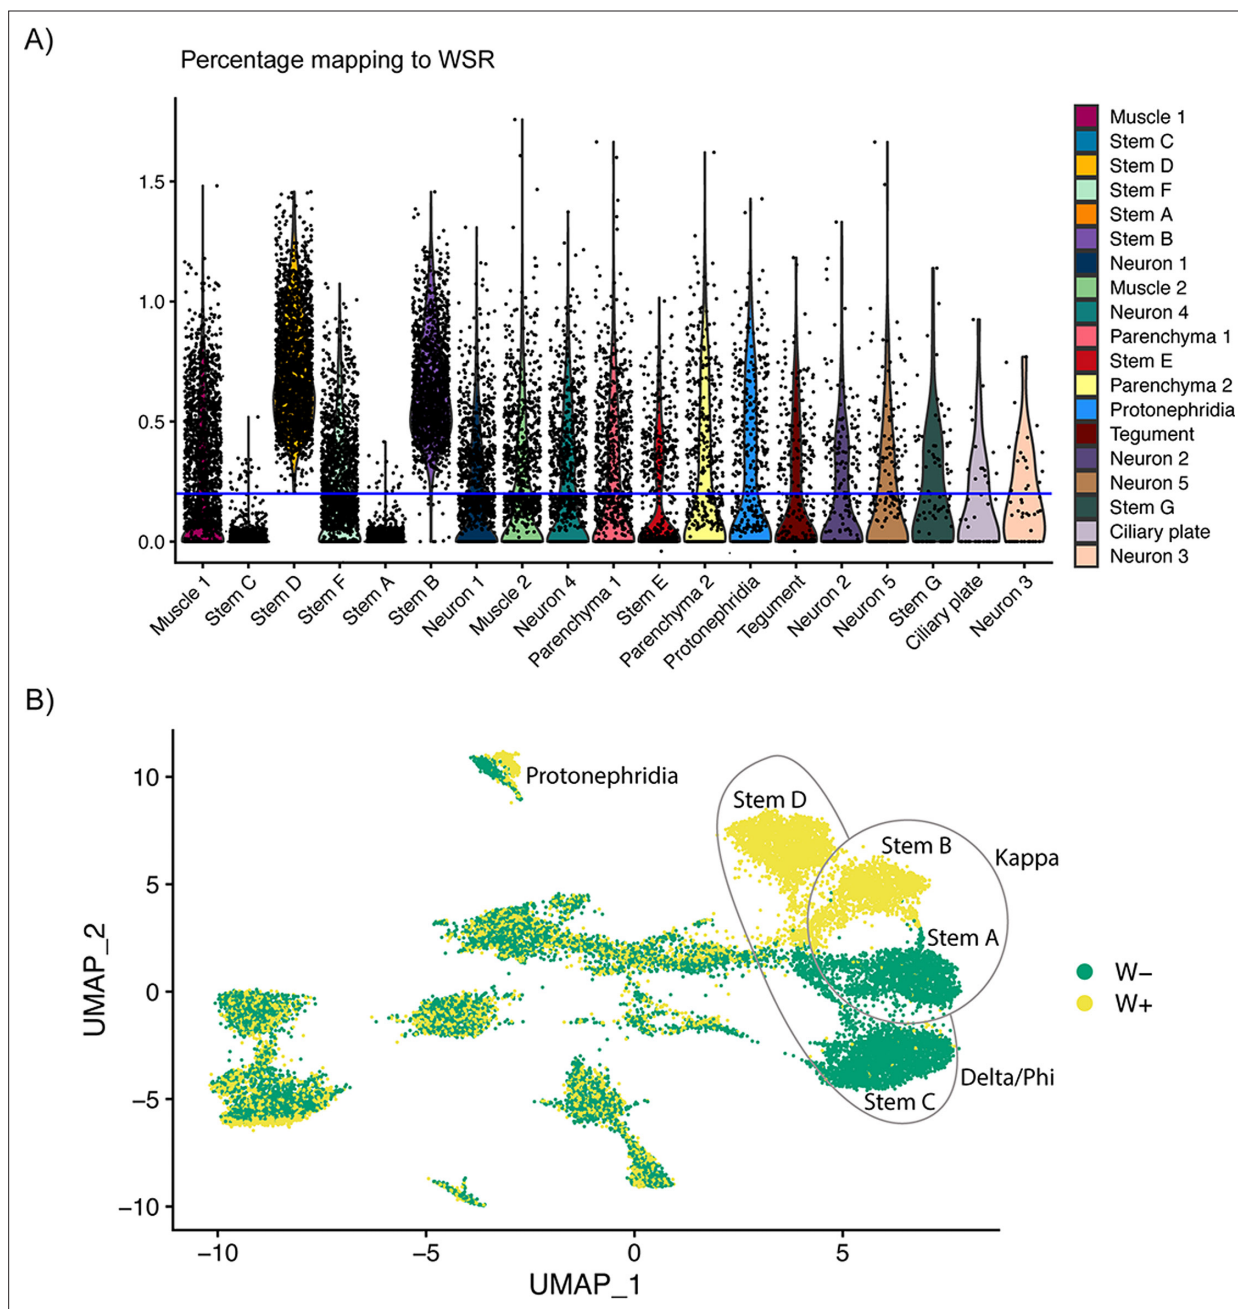

**Figure 5—figure supplement 4.** Classification of cells based on percentage of reads mapping to W-specific region indicates incomplete dosage compensation of Z-specific region genes. **(A)** The percentage of reads mapping to W-specific genes by cluster. The blue line at 0.2% indicates where the data were split into W+ and W- categories, that is Stems B and D contain cells with reads mapping to W-specific genes (and are likely cells from female miracidia), whereas most cells in Stems A and C do not have reads mapping to W-specific genes (cells from male miracidia). **(B)** UMAP showing the clusters by W+ and W- categories. Almost complete separation can be seen in the main stem cell clusters, and the categories are mixed in most other clusters.

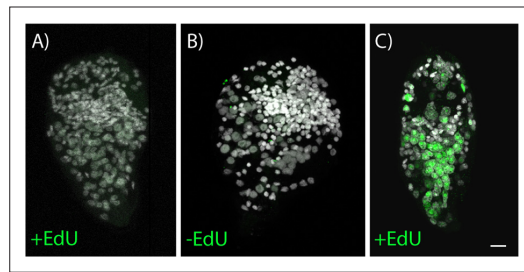

**Figure 5—figure supplement 5.** 5-ethynyl-2'-deoxyuridine (EdU) labelling shows that there are no dividing cells during the free-swimming miracidia stage. **(A)** Four-hour EdU pulse on miracidia 0–6 hr post-hatching shows no EdU incorporation in any cells. **(B)** Negative control. **(C)** Positive control, 3-day EdU pulse on freshly transformed mother sporocysts shows many dividing cells incorporating EdU, all treatments  $n = 30$ . Scale bar = 10  $\mu\text{m}$ .

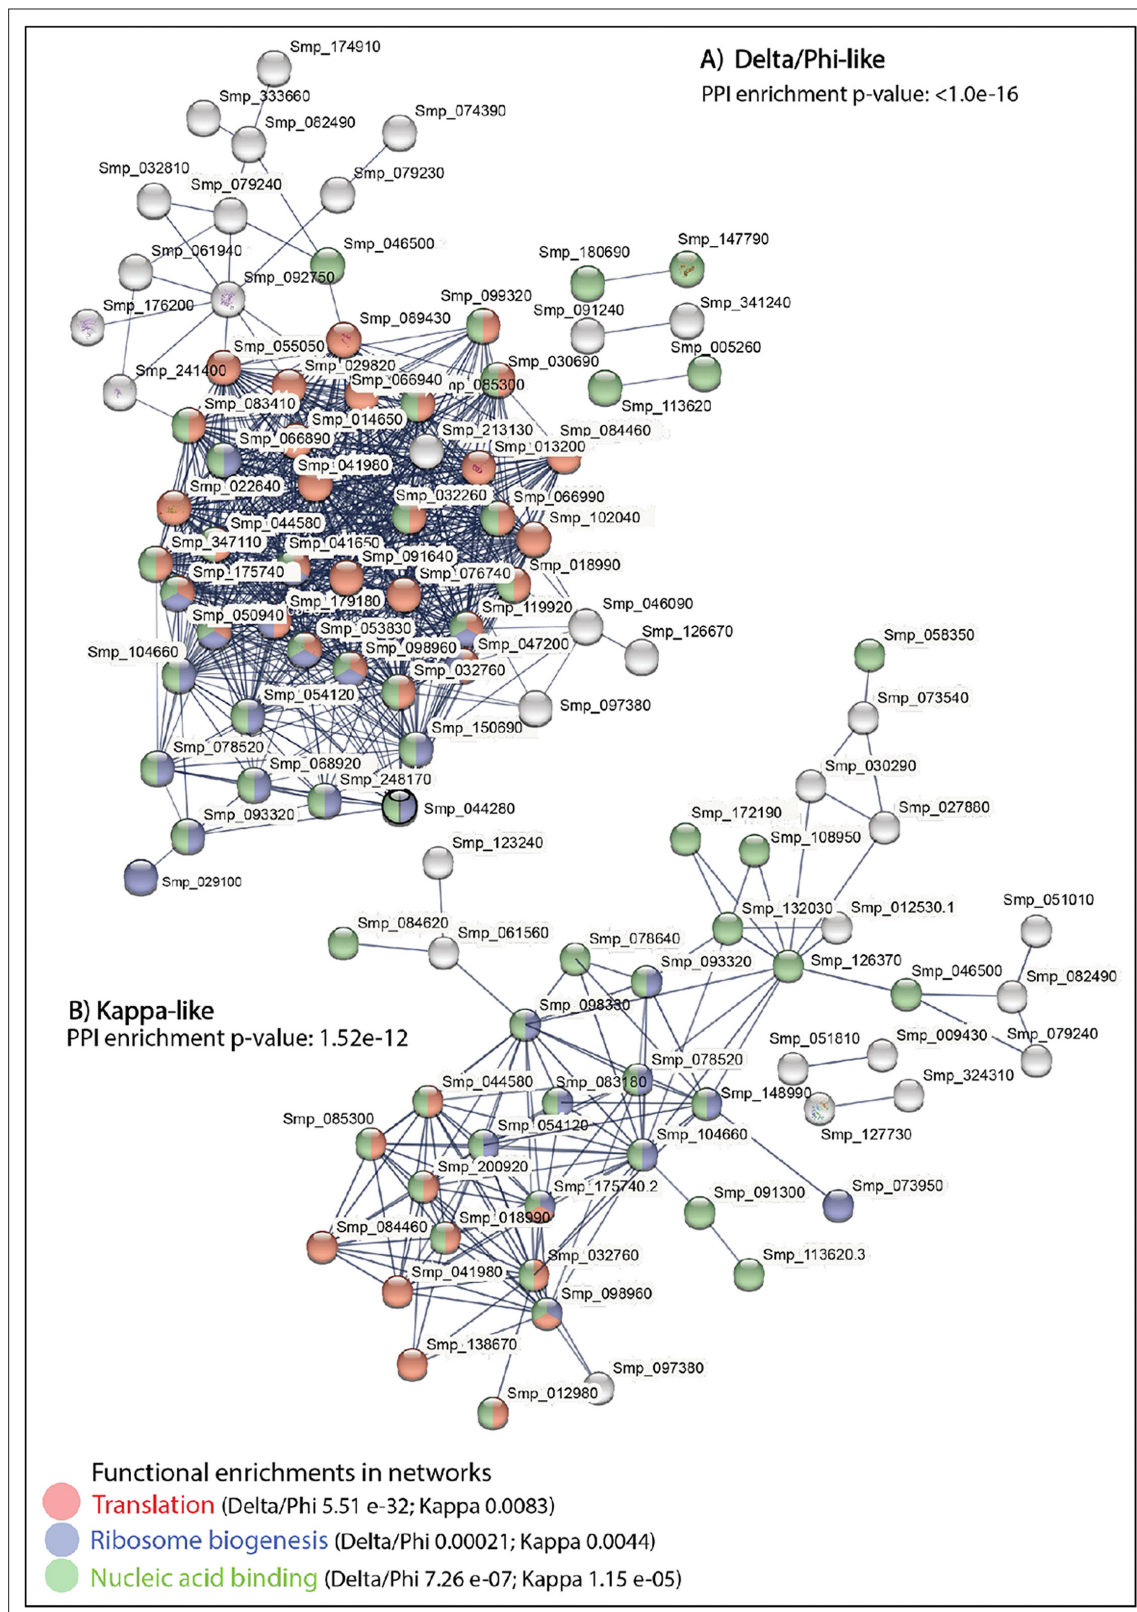

**Figure 5—figure supplement 6.** STRING analysis of the top 100 marker genes for the two stem cell populations in the miracidium (combining the female and male cells). **(A)** Sixty-one of the top markers of Stems C and D combined (i.e. Delta/Phi-like) and **(B)** 37 for Stems A and B combined (i.e. Kappa-like) form large predicted interactions enriched for translation, ribosome biogenesis, and nucleic acid binding. Lines (edges) connecting nodes are based on evidence of the function of homologues. Functional enrichment (FDR) as provided by STRING. PPI = predicted protein interaction. Minimum interaction (confidence) score of 0.7, corresponding to a high level of confidence.

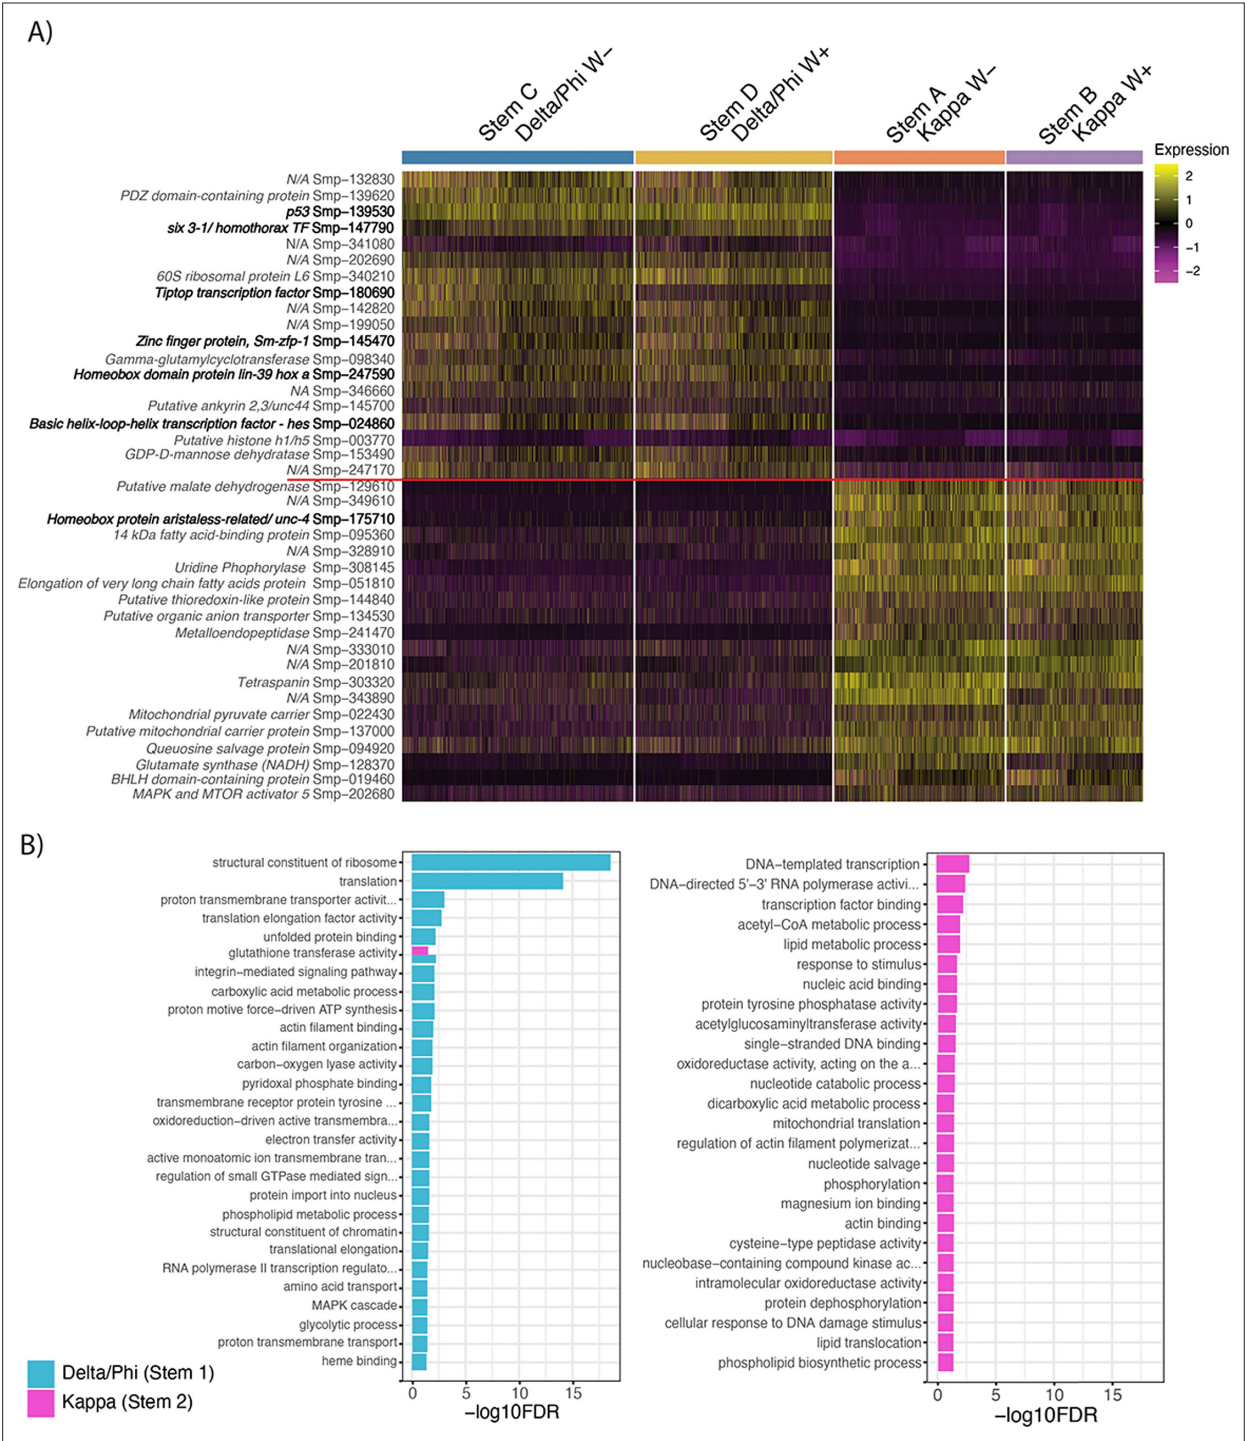

**Figure 5—figure supplement 7.** Differential gene expression between the two stem cell populations, Delta/Phi and Kappa. **(A)** Heatmap of top differentially expressed genes (by adjusted p-value) from each of Delta/Phi and Kappa populations show a high number of transcription factors (bold) in Delta/Phi and enrichment of lipid and glycolytic metabolism genes in Kappa. Gene expression has been log-normalised and scaled using Seurat(v. 4.3.0). **(B)** Gene ontology analysis of DEG (adj p < 0.001) revealed that upregulated genes in Delta/Phi were related to the structural constituent of the ribosome and translation, while upregulated genes in Kappa were related to transcription and metabolism.



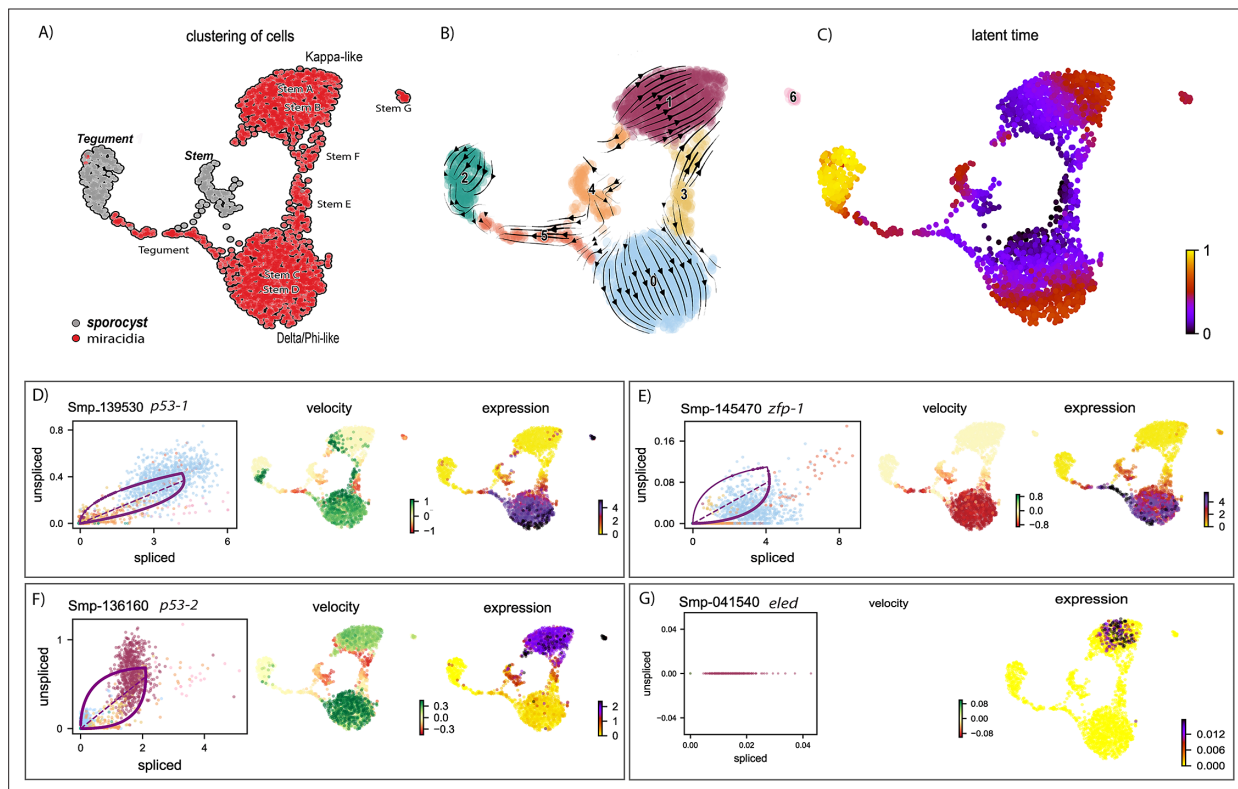

**Figure 6.** RNA velocity analysis of stem and tegument cells from the miracidium and sporocyst shows lineage-specific gene dynamics. **(A)** UMAP shows the life cycle stage origin of cells and cell cluster identity from Seurat analysis. **(B)** RNA velocity analysis flow field shows the generalised direction of RNA velocity. **(C)** Latent time analysis shows an estimated temporal relationship between cells. **(B** and **C)** are based on the expression of both spliced and unspliced transcripts, and their expression dynamics across cells and genes. The phase plot, velocity, and expression were calculated for **(D)** *p53-1*, **(E)** *Zfp-1*, **(F)** *p53-2*, and **(G)** *eled* (no batch correction). Gene expression has been normalised using counts per million (CPM Expanded and re-phrased) and log-transformed using scvelo(v. 0.2.4). For all of **(D–G)**, the phase plot (left plot) shows the proportion of spliced and unspliced transcripts in each cell, where each point is a cell and is coloured by the clusters in **(B)**. The purple almond-shape overlaid represents the processes of transcription, splicing, and degradation, where this can be modelled. The dashed line shows the estimated steady state where RNA transcription is constant. The middle panel shows the RNA velocity, which for each gene is based on how the observations deviated from the estimated steady state towards induction or repression. The right panel shows gene expression. *p53-1* and *zfp-1* are predominantly expressed in the Delta/Phi-like miracidia stem cells and some miracidia tegument, and velocity indicates active expression of *p53-1* but downregulation of *zfp-1* in the stem cells. *p53-2* is most highly expressed in the Kappa-like miracidia stem cells, and velocity indicates this gene is being actively transcribed. *eled* expression is very low and only spliced transcripts have been detected, but is generally restricted to the Kappa-like miracidia stem cells.

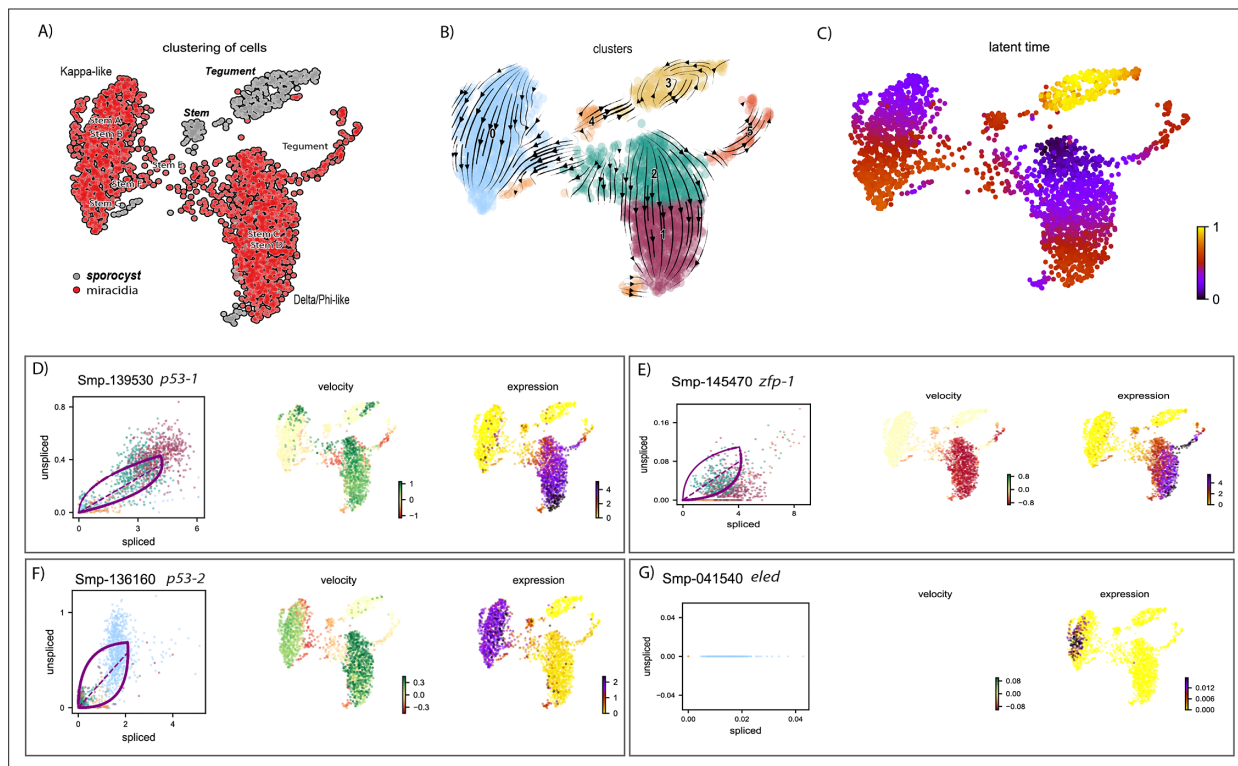

**Figure 6—figure supplement 1.** RNA velocity analysis of stem and tegument cells from the miracidium and sporocyst (with batch correction) shows lineage-specific gene dynamics. **(A)** UMAP shows the life cycle stage origin of cells and cell cluster identity from Seurat analysis. **(B)** RNA velocity analysis flow field shows generalised direction of RNA velocity. **(C)** Latent time analysis shows an estimated temporal relationship between cells. The phase plot, velocity, and expression were calculated for **(D)** *p53-1*, **(E)** *Zfp-1*, **(F)** *p53-2*, and **(G)** *eled*. Gene expression has been normalised (CPM) and log-transformed using scvelo(v. 0.2.4). *p53-1* and *zfp-1* are predominantly expressed in the Delta/Phi-like miracidia stem cells and miracidia tegument, and velocity indicates active expression of *p53-1* but downregulation of *zfp-1* in the stem cells. *p53-2* is most highly expressed in the Kappa-like miracidia stem cells, and velocity indicates this gene is being actively transcribed. *eled* expression is very low and only spliced transcripts have been detected, but is generally restricted to the Kappa-like miracidia stem cells.

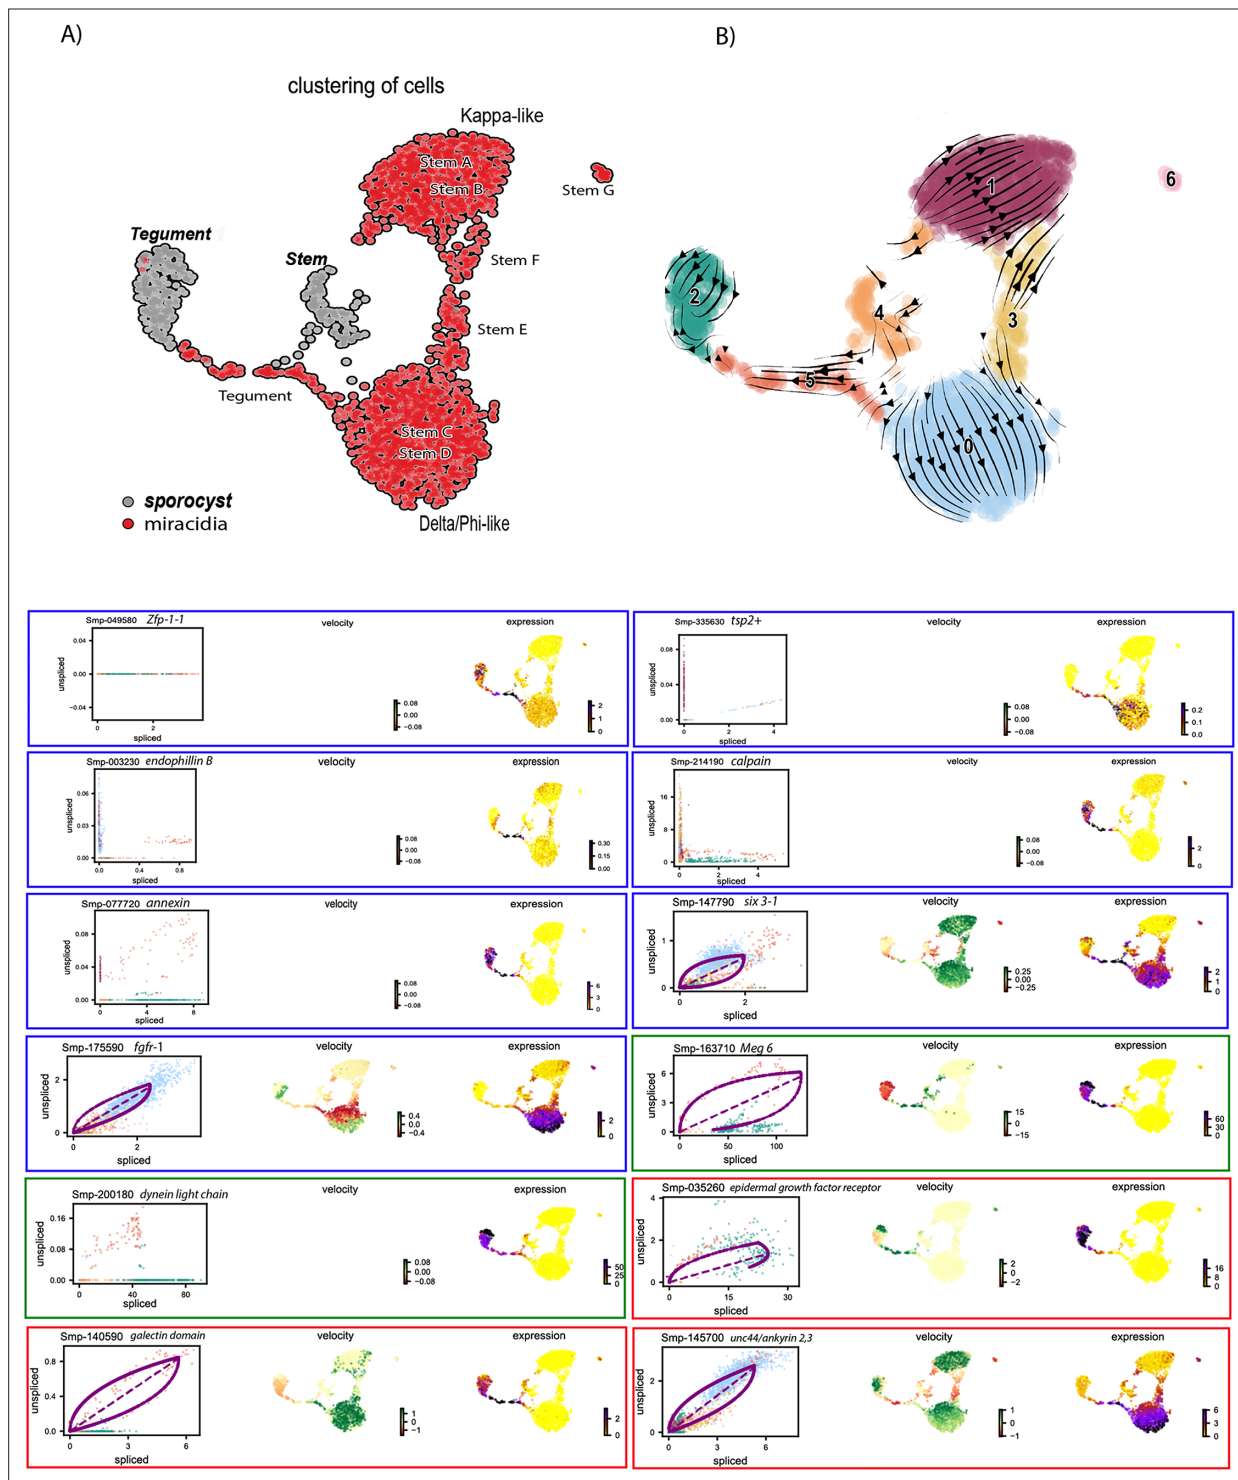

**Figure 6—figure supplement 2.** RNA velocity analysis of stem and tegument cells from the miracidium and sporocyst (without batch correction). **(A)** UMAP shows the life cycle stage origin of cells and cell cluster identity from Seurat analysis. **(B)** RNA velocity analysis flow field shows generalised direction of RNA velocity. Phase plot, velocity, and expression as calculated for genes mentioned in text: blue outline = known molecular regulators of tegument development and tegument markers in adult *S. mansoni* and planaria. Green outline = miracidia and sporocyst tegument marker genes. Red outline = genes revealed by RNA velocity analysis to be highly dynamic in the Delta/Phi, miracidia, and sporocyst tegument cells. Gene expression has been normalised (CPM) and log-transformed using scvelo(v. 0.2.4).



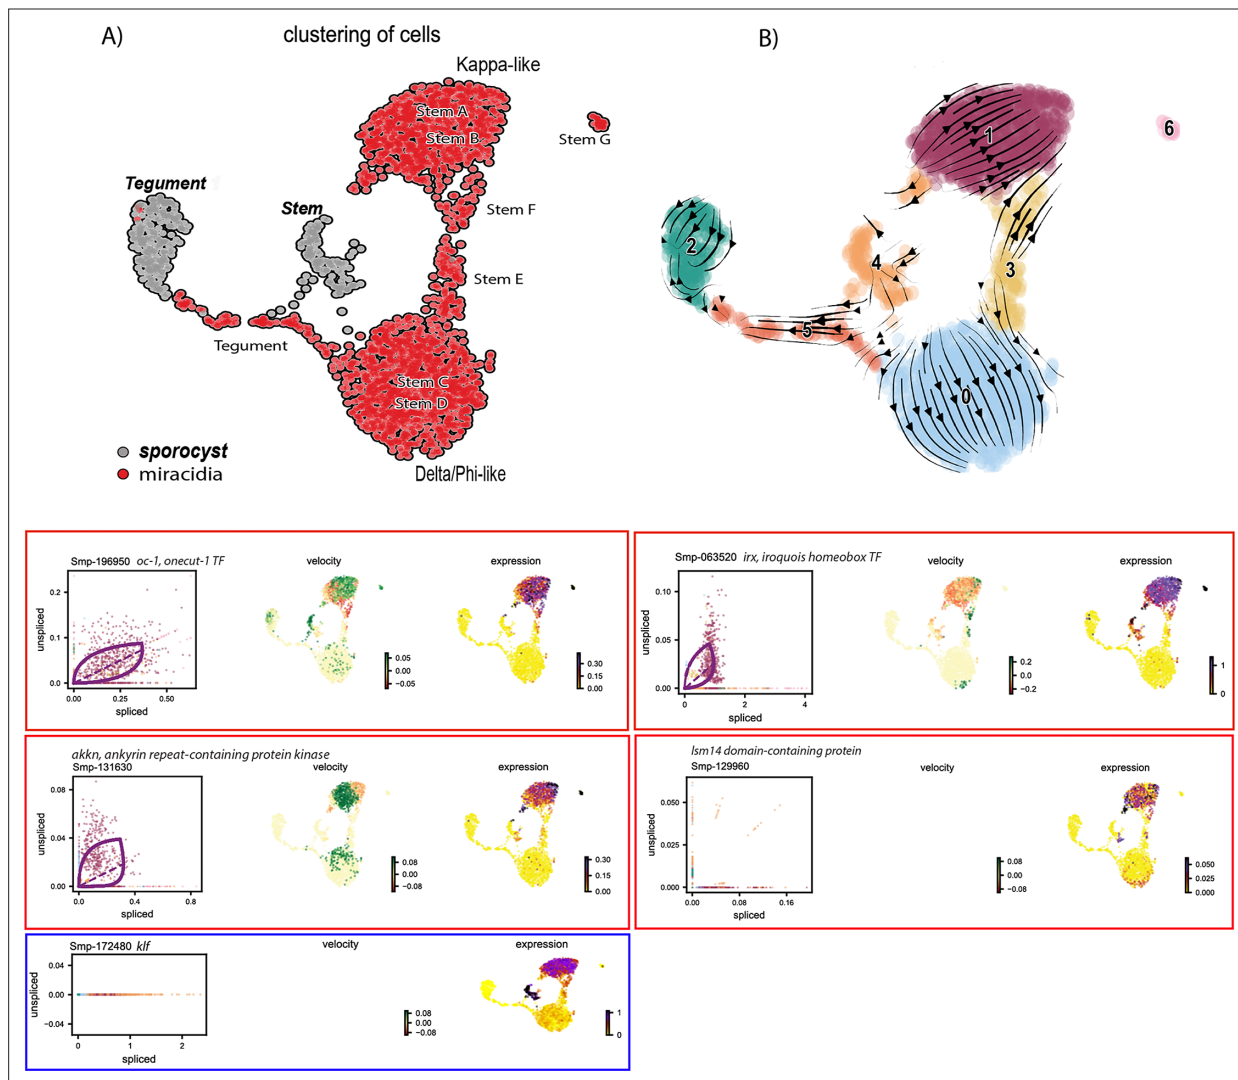

**Figure 6—figure supplement 3.** RNA velocity analysis of stem and tegument cells from the miracidium and sporocyst (without batch correction). **(A)** UMAP shows the life cycle stage origin of cells and cell cluster identity from Seurat analysis. **(B)** RNA velocity analysis flow field shows generalised direction of RNA velocity. Phase plot, velocity, and expression as calculated for genes that are mentioned in the text: red outline = known molecular regulators of germline stem cells in adult *S. mansoni*. Blue outline = pluripotency gene. *Oc-1* expression is low with little velocity signal, but the expression is predominantly seen in the Kappa-like miracidia stem cells (and Stem G). *Ir*x is also primarily expressed in the Kappa-like miracidia stem cells with velocity results indicating an accumulation of spliced transcripts. *Ir*x transcripts are also detected in Stem G and the sporocyst stem/germinal cells. *Akkn* expression is low and largely seen in the Kappa-like and Stem G miracidia stem clusters. *Lsm14* domain-containing protein transcripts are most consistently expressed in the Kappa-like miracidia stem cells. *Kif* is most highly expressed in sporocyst stem/germinal cells, and the Kappa-like miracidia stem cluster. Gene expression has been normalised (CPM) and log-transformed using scvelo(v. 0.2.4).

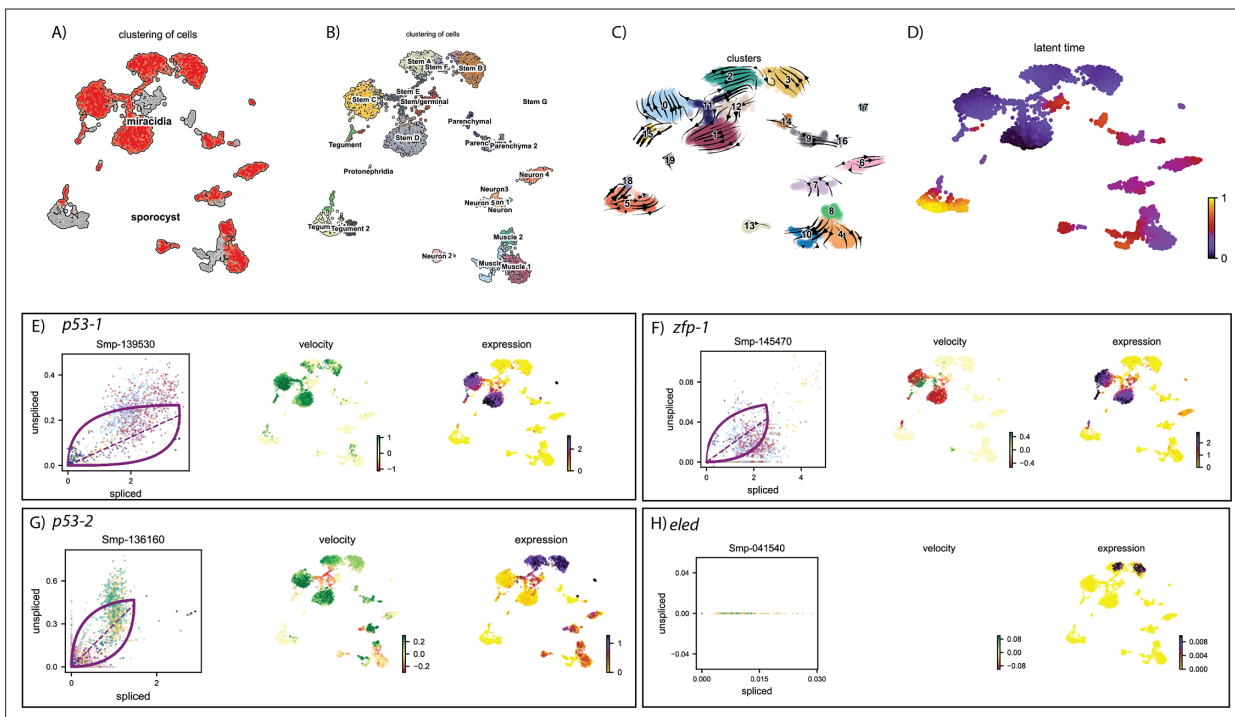

**Figure 6—figure supplement 4.** RNA velocity analysis of all tissue types from the miracidium and sporocyst shows lineage-specific gene dynamics. (A) UMAP shows the life cycle stage origin of cells and (B) shows cell cluster identity from Seurat analysis. (C) RNA velocity analysis flow field shows the generalised direction of RNA velocity. (D) Latent time analysis shows an estimated temporal relationship between cells. Phase plot, velocity, and expression as calculated for (E) *p53-1*, (F) *zfp-1*, (G) *p53-2*, and (H) *eled* (no batch correction, sporocyst cells combined with miracidia sample 1 cells). *P53-1* is most highly expressed in the Delta/phi-like miracidia stem clusters and some of the miracidia tegument cells, and the velocity indicates active transcription. *Zfp-1* is expressed most highly in the same clusters, but velocity suggests that the majority of transcripts are spliced. *P53-2* expression is highest in the Kappa-like miracidia stem clusters, but the expression is detected in several other clusters, including muscle, neuron, and other stem clusters. Velocity indicates that this gene is being actively transcribed in the majority of these clusters. *Eled* expression is very low, but restricted to the Kappa-like miracidia stem clusters. Gene expression has been normalised (CPM) and log-transformed using scvelo(v. 0.2.4).

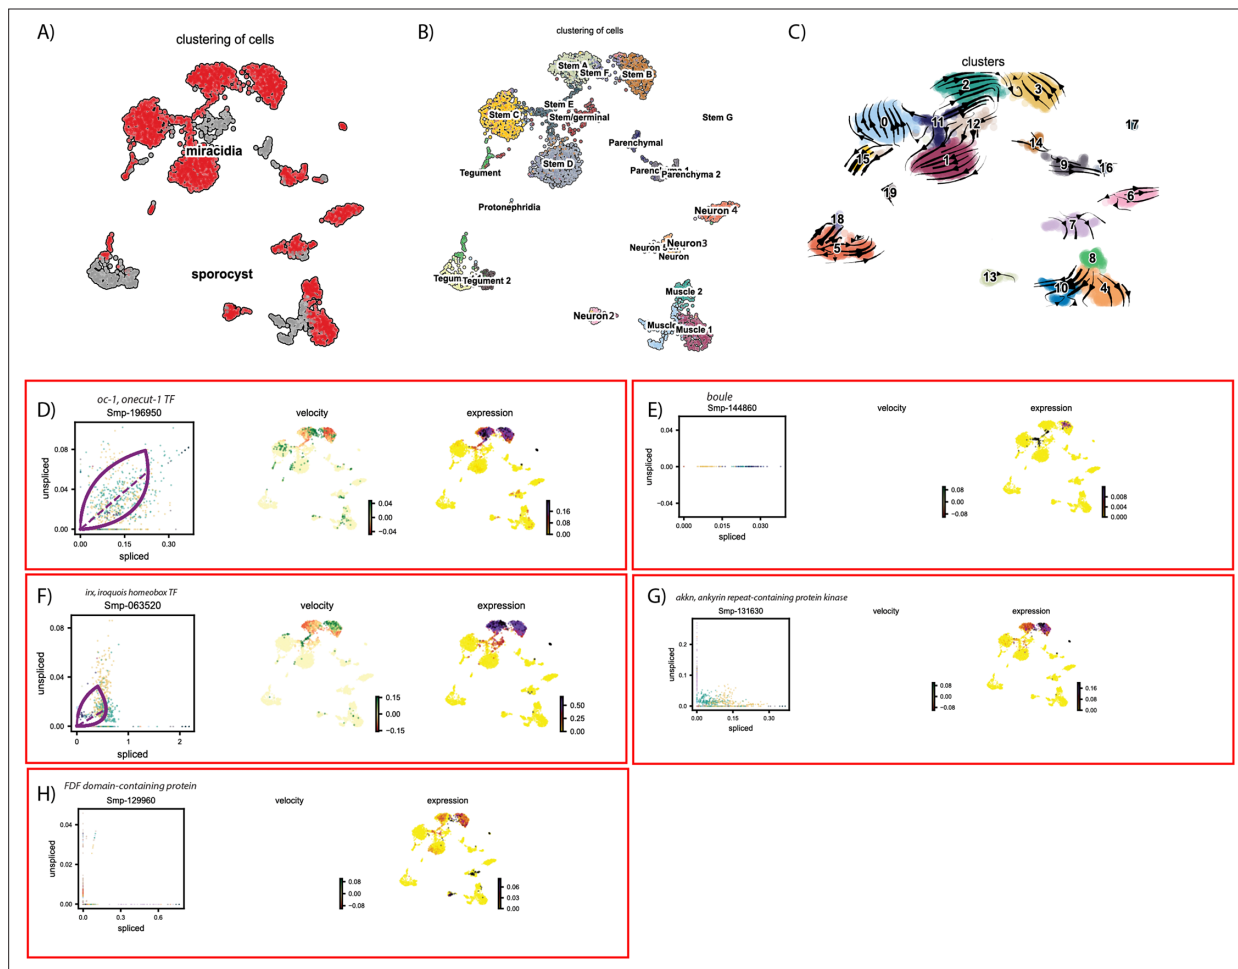

**Figure 6—figure supplement 5.** RNA velocity analysis of all tissue types from the miracidium and sporocyst shows the dynamics of described germline-related genes. (A) UMAP shows the life cycle stage origin of cells and (B) shows cell cluster identity from Seurat analysis. (C) RNA velocity analysis flow field shows the generalised direction of RNA velocity. Phase plot, velocity, and expression as calculated for (D) *oc-1*, (E) *boule*, (F) *irx*, (G) *akkn*, and (H) an FDF domain-containing protein (no batch correction, sporocyst cells combined with miracidia sample 1 cells.). *Oc-1* expression is low but generally specific to the two Kappa-like miracidia stem cell clusters, and Stem G. Only spliced *Boule* transcripts were detected, and with low expression, predominantly in the Stem B and E clusters. *Irx* was most highly expressed in Kappa-like miracidia stem clusters, as well as Stem E, Stem G, and sporocyst stem/germinal cells. *Akkn* is also largely expressed in the Kappa-like miracidia stem clusters. The FDF domain-containing protein expression is low, but seen most in Kappa-like miracidia stem clusters, Stem G, and several neural clusters. Gene expression has been normalised (CPM) and log-transformed using scvelo(v. 0.2.4).

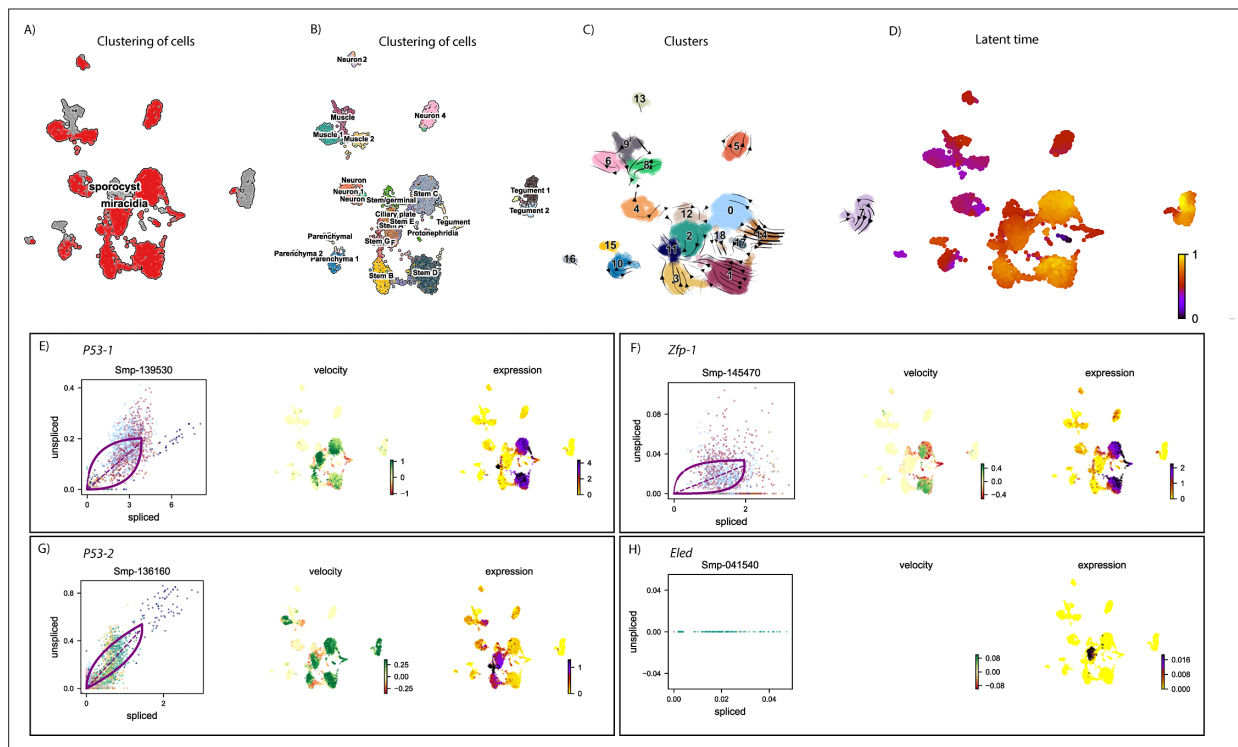

**Figure 6—figure supplement 6.** RNAvelocity analysis of all tissue types from the miracidium and sporocyst shows lineage-specific gene dynamics. (A) UMAP shows the life cycle stage origin of cells and (B) shows cell cluster identity from Seurat analysis. (C) RNA velocity analysis flow field shows the generalised direction of RNA velocity. (D) Latent time analysis shows an estimated temporal relationship between cells. Phase plot, velocity, and expression as calculated for (E) *p53-1*, (F) *Zfp-1*, (G) *p53-2*, and (H) *eled* (no batch correction, sporocyst cells combined with miracidia sample four cells). *p53-1* and *zfp-1* are predominantly in the Delta/Phi-like miracidia stem cell clusters (Stems C and D) and also in the miracidia tegument. Velocity indicates that *p53-1* is being induced in the stem cells and repressed in the tegument, while *zfp-1* shows a gradient of velocity in the stem cells and repression in the tegument. *P53-2* is most highly expressed in the Kappa-like miracidia stem cells (Stems A and B) and Stem F, with velocity results indicating active transcription. *eled* expression was very low, but primarily in the Kappa-like miracidia stem cells (particularly Stem A). Gene expression has been normalised (CPM) and log-transformed using scvelo(v. 0.2.4).



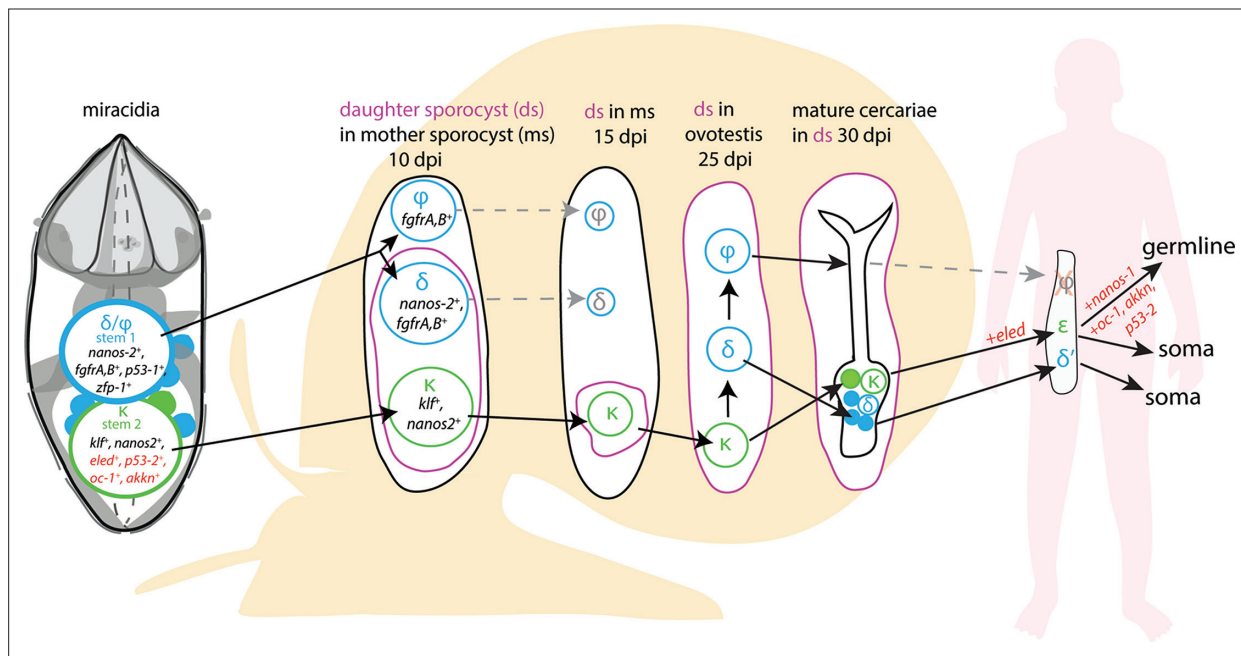

**Figure 7.** A model for the fate of the two stem populations in the miracidium. Adding single-cell data for miracidia stem cells (this study) to existing stem cell scenarios on *Schistosoma mansoni* development (Wang et al., 2018; Li et al., 2021) show the continuum of the Kappa ( $\kappa$ ) population from the miracidium, through the intra-molluscan stages to the juvenile and adult stages inside the mammalian host. Wang et al., 2018 proposed that the  $\kappa$  cells give rise to epsilon ( $\epsilon$ ), *eled*<sup>+</sup>, cells in the juvenile primordial testes, ovaries, and vitellaria (germline), as well as in a gradient increasing towards the posterior growth zone (soma). They suggested that germ cells may be derived from  $\epsilon$ -cells early in juvenile development, and *eled* is the earliest germline marker yet identified in schistosomes. This led to the idea that *S. mansoni* does not specify its germline until the juvenile stage (Wang et al., 2018) and a germline-specific regulatory programme (including *eled*, *oc-1*, *akkn*, *nanos-1*, *boule*) was identified in intra-mammalian stages (Wang et al., 2018; Li et al., 2021). We show expression of these genes in  $\kappa$  stem cells in the miracidium. This suggests that after ~6 days of embryogenesis, at hatching of the miracidium, the cells that may contribute to the germline might already be segregated into the  $\kappa$  population and the molecular regulatory programme that differentiates somatic (delta/phi,  $\delta/\phi$ ) and germ cell ( $\kappa$ ) lineages is present. Furthermore, as *p53-2* plays a genotoxic stress response role in adult reproductive cells (Wendt et al., 2022), its expression in  $\kappa$  cells in the miracidia is another line of evidence that indicates that this population may contain the pluripotent stem cells that likely give rise to the germline.

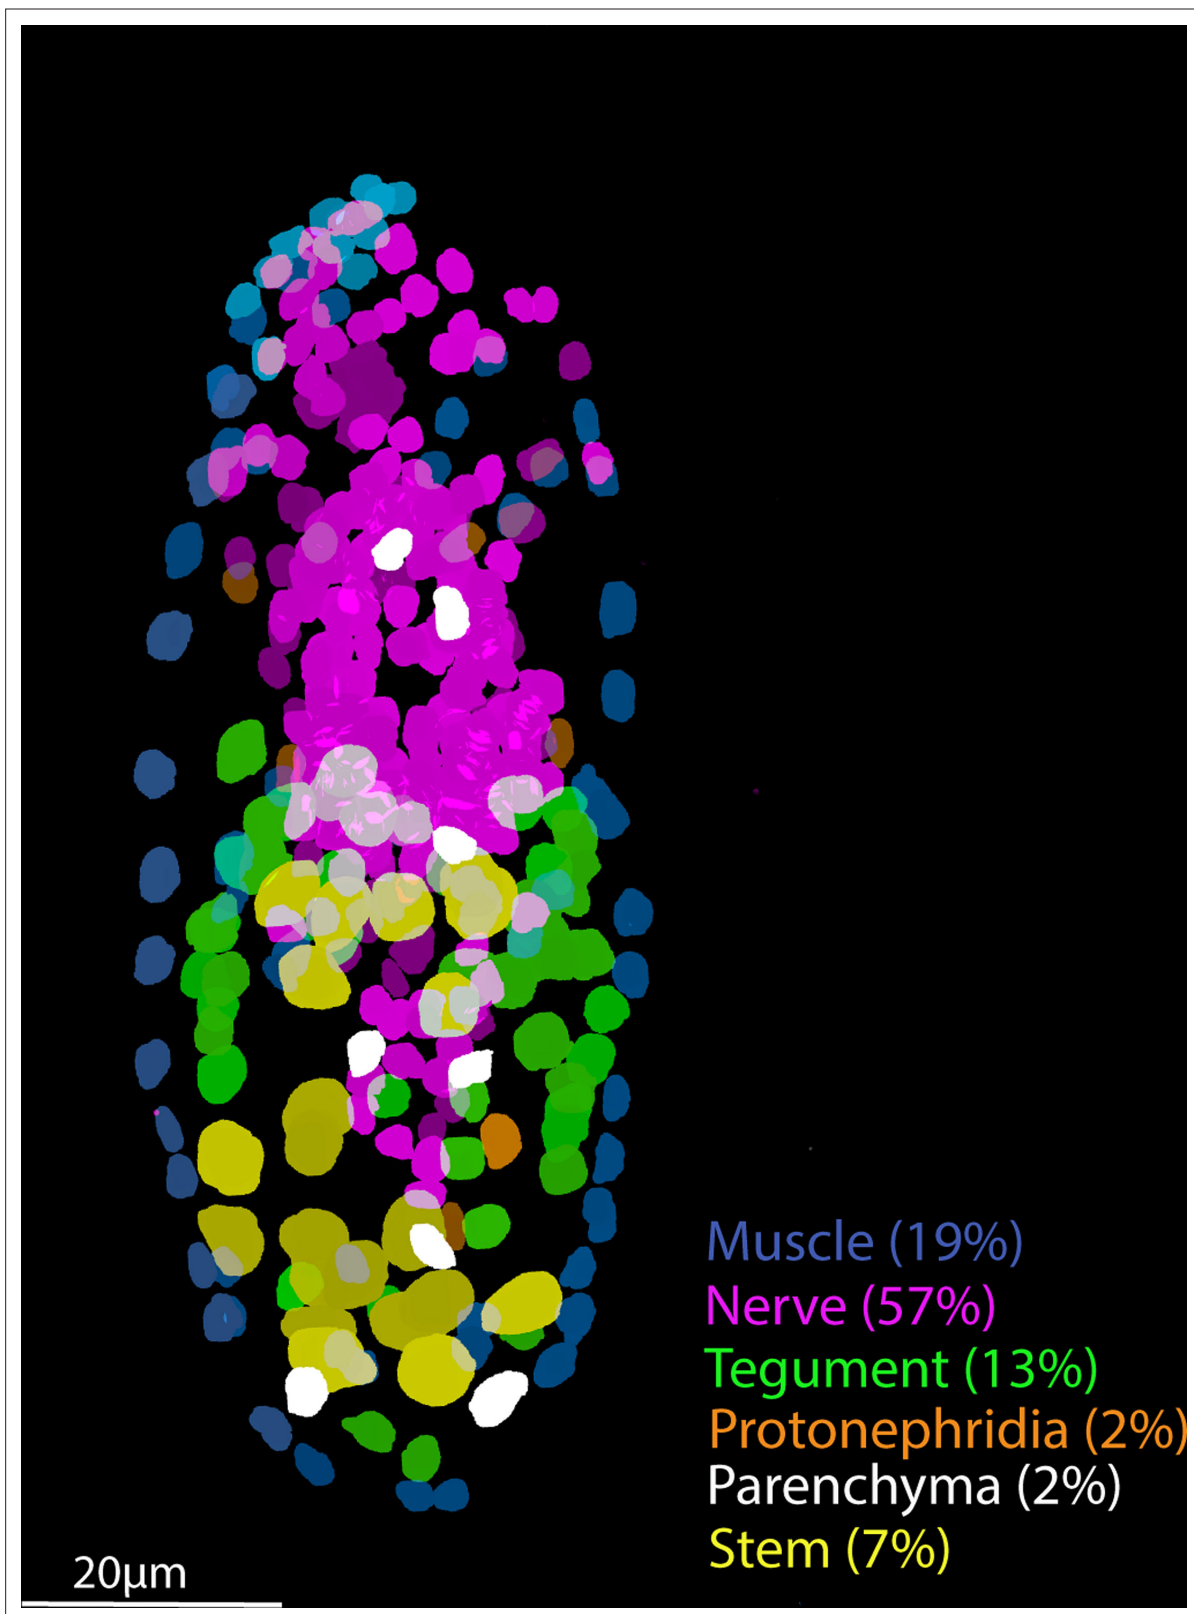

**Figure 8.** Tissue-level segmentation of a miracidium reveals the contribution of each tissue to this simple larva. In situ hybridisation using HCR (hybridisation chain reaction) enabled multiple tissue-level marker genes to be visualised simultaneously in the same larva. The nuclei of the cells of each tissue type were manually segmented using TrakEM2 in ImageJ (*Cardona et al., 2012*).
