# Supplementary material for: A single-cell atlas of the miracidium larva of Schistosoma mansoni reveals cell types, developmental pathways, and tissue architecture
Source: eLife. 2024 Aug 27;13:RP95628. doi: 10.7554/eLife.95628 (PMC11349301; doi:10.7554/eLife.95628)
Supplement: Supplementary file 1. — (a) Samples and single cell RNA-seq (scRNA-seq) mapping statistics. (b) Seurat marker genes in all cell clusters. (c) Seurat top 5 marker genes in all cell clusters. (d) Contribution of sorted and unsorted samples to the 19-cell clusters. (e) Muscle clusters 1 and 2 differential gene expression analysis. (f) Marker genes for Neuron 1 self-assembling manifold (SAM) subclusters. (g) Gene ontology (GO) enrichment terms. (h) Top 200 genes by TPM (transcripts per million) in gland cells from plate-based scRNA-seq. (i) GO terms from the top 200 genes by TPM in gland cells and ciliary plates from NEB-seq. (j) Significant gene expression differences between gland cells and ciliary plates from plate-based scRNA-seq. (k) Significant gene expression differences between gland cells and other cells from plate-based scRNA-seq. (l) Top 200 genes by TPM in ciliary plates from plate-based scRNA-seq. (m) GO enrichment terms for W-specific region (WSR), Z-specific region (ZSR), and WSR + ZSR genes. (n) Stem clusters Delta/Phi and Kappa differential gene expression. (o) GO enrichment terms of stem differentially expressed genes. (p) Top 5 dynamical genes from each cluster from stem and tegument RNA velocity analysis. (q) Comparison of tissue-type composition of the miracidium via in situ hybridisation and the scRNA-seq data. (r) In situ hybridisation probes. [file elife-95628-supp1.xlsx]

## Sheet: Overview
Supplementary files 1 a-r
Supp File 1a	Samples and single cell RNA-Seq mapping statistics
Supp File 1b	Seurat marker genes in all cell clusters
Supp File 1c	Seurat top 5 marker genes in all cell clusters
Supp File 1d	Contribution of sorted and unsorted samples to the 19 cell clusters
Supp File 1e	Muscle clusters DEG analysis
Supp File 1f	Marker genes for Neuron 1 SAM subclusters
Supp File 1g	GO enrichment terms
Supp File 1h	Plate-based scRNA-seq gland cell tpm
Supp File 1i	Plate-based scRNA-seq gland cell and ciliary plate GO terms
Supp File 1j	Plate-based scRNA-seq gland cell vs ciliary plate gene expression
Supp File 1k	Plate-based scRNA-seq gland cell vs other cell gene expression
Supp File 1l	Plate-based scRNA-seq ciliary plate tpm
Supp File 1m	GO enrichment terms for WSR, ZSR, and WSR +ZSR genes
Supp File 1n	Stem clusters Delta/Phi and Kappa differential gene expression
Supp File 1o	GO enrichment terms of stem differentially expressed genes
Supp File 1p	RNAvelocity dynamical genes by cluster
Supp File 1q	Comparison of tissue type composition of the miracidium via in situ hybridisation and the scRNA-seq data
Supp File 1r	In situ hybridisation probes

## Sheet: Supp File 1a
Supplementary File 1a - Samples and single cell RNA-Seq mapping statistics
10X Single cell with Cellranger
Sample_ID	Genome version	Cells detected	Mean Reads per Cell	Median Genes per Cell	Total number of genes detected	Median UMI counts per cell	Sorting status	seurat_ID	Perc reads in cells	Percent reads mapping to transcriptome	Run Accession
miracell10376067	v10	4379	185040	2250	9095	7575	Sorted	sample1	91.4	66.6	ERR12372709
miracell10376068	v10	12939	67526	1022	9185	2476	Unsorted	sample2	75.9	64.4	ERR12372706
miracell10376069	v10	11611	68863	1173	9178	3243	Unsorted	sample3	80.1	64.3	ERR12372707
miracell10376070	v10	4462	150843	2235	9102	8055	Sorted	sample4	87.2	60.2	ERR12372708
NEB Single cell with kallisto
kallisto_name	type	number of cells	kallisto pseudomapping percentage	Run Accession	Sample_ID
miracidia_NEB_sample1	gland cell	1	83.9	ERR12372710	miracell12765946
miracidia_NEB_sample2	gland cell	1	90	ERR12372711	miracell12765947
miracidia_NEB_sample3	gland cell	1	75	ERR12372712	miracell12765948
miracidia_NEB_sample4	gland cell	1	87.5	ERR13441823	miracell12765949
miracidia_NEB_sample5	gland cell	1	81.1	ERR12372714	miracell12765950
miracidia_NEB_sample6	gland cell	1	77.7	ERR12372715	miracell12765951
miracidia_NEB_sample7	gland cell	1	72.7	ERR13441824	miracell12765952
miracidia_NEB_sample8	gland cell	10	72.7	ERR12372717	miracell12765953
miracidia_NEB_sample9	gland cell	1	86.9	ERR12372718	miracell12765954
miracidia_NEB_sample10	gland cell	2	76	ERR12372719	miracell12765955
miracidia_NEB_sample11	gland cell	1	75.8	ERR12372720	miracell12765956
miracidia_NEB_sample12	gland cell	1	81.3	ERR12372721	miracell12765957
miracidia_NEB_sample13	gland cell	1	77.1	ERR12372722	miracell12765958
miracidia_NEB_sample14	gland cell	1	75.7	ERR12372723	miracell12765959
miracidia_NEB_sample15	gland cell	1	82.7	ERR12372724	miracell12765960
miracidia_NEB_sample16	gland cell	10	67.6	ERR12372725	miracell12765961
miracidia_NEB_sample17	gland cell	1	81.7	ERR12372726	miracell12765962
miracidia_NEB_sample18	gland cell	1	68.3	ERR12372727	miracell12765963
miracidia_NEB_sample19	gland cell	1	75	ERR12372728	miracell12765964
miracidia_NEB_sample20	gland cell	1	75.4	ERR12372729	miracell12765965
miracidia_NEB_sample21	gland cell	1	66.7	ERR12372730	miracell12765966
miracidia_NEB_sample22	gland cell	1	78.6	ERR12372731	miracell12765967
miracidia_NEB_sample23	gland cell	1	77.2	ERR12372732	miracell12765968
miracidia_NEB_sample24	gland cell	10	75.2	ERR12372733	miracell12765969
miracidia_NEB_sample25	gland cell	1	80.7	ERR12372734	miracell12765970
miracidia_NEB_sample26	gland cell	1	77.3	ERR12372735	miracell12765971
miracidia_NEB_sample27	gland cell	1	79.7	ERR13441825	miracell12765972
miracidia_NEB_sample28	ciliary plate	1	26.9	ERR12372737	miracell12765973
miracidia_NEB_sample29	ciliary plate	1	52	ERR12372738	miracell12765974
miracidia_NEB_sample30	ciliary plate	1	59.8	ERR12372739	miracell12765975
miracidia_NEB_sample31	ciliary plate	1	69.4	ERR12372740	miracell12765976
miracidia_NEB_sample32	ciliary plate	10	60	ERR12372741	miracell12765977
miracidia_NEB_sample33	ciliary plate	1	65.4	ERR13441826	miracell12765978
miracidia_NEB_sample34	ciliary plate	1	57.7	ERR12372743	miracell12765979
miracidia_NEB_sample35	ciliary plate	1	54	ERR12372744	miracell12765980
miracidia_NEB_sample36	ciliary plate	1	49.4	ERR12372745	miracell12765981
miracidia_NEB_sample37	ciliary plate	1	57.8	ERR12372746	miracell12765982
miracidia_NEB_sample38	ciliary plate	1	78.6	ERR12372747	miracell12765983
miracidia_NEB_sample39	ciliary plate	1	45.8	ERR12372748	miracell12765984
miracidia_NEB_sample40	ciliary plate	10	80.2	ERR12372749	miracell12765985
miracidia_NEB_sample41	ciliary plate	1	0.1	ERR12372750	miracell12765986
miracidia_NEB_sample42	ciliary plate	1	32.8	ERR12372751	miracell12765987
miracidia_NEB_sample43	ciliary plate	1	60.5	ERR12372752	miracell12765988
miracidia_NEB_sample44	ciliary plate	1	17.7	ERR12372753	miracell12765989
miracidia_NEB_sample45	ciliary plate	1	75.7	ERR12372754	miracell12765990
miracidia_NEB_sample46	ciliary plate	1	56.1	ERR12372755	miracell12765991
miracidia_NEB_sample47	ciliary plate	1	2.5	ERR12372756	miracell12765992
miracidia_NEB_sample48	ciliary plate	10	66.2	ERR13441827	miracell12765993
miracidia_NEB_sample49	gland cell	1	73	ERR12372758	miracell12765994
miracidia_NEB_sample50	gland cell	1	80.1	ERR12372759	miracell12765995
miracidia_NEB_sample51	other cell	1	83.8	ERR12372760	miracell12765996
miracidia_NEB_sample52	other cell	1	85.4	ERR12372761	miracell12765997
miracidia_NEB_sample53	other cell	1	88	ERR12372762	miracell12765998
miracidia_NEB_sample54	other cell	1	81.3	ERR12372763	miracell12765999
miracidia_NEB_sample55	other cell	1	74.9	ERR12372764	miracell12766000
miracidia_NEB_sample56	other cell	1	85.3	ERR12372765	miracell12766001
miracidia_NEB_sample57	other cell	1	86.7	ERR12372766	miracell12766002
miracidia_NEB_sample58	other cell	1	86	ERR12372767	miracell12766003
miracidia_NEB_sample59	other cell	1	83.4	ERR12372768	miracell12766004
miracidia_NEB_sample60	other cell	4	83.9	ERR12372769	miracell12766005
miracidia_NEB_sample61	other cell	1	75.8	ERR12372770	miracell12766006
miracidia_NEB_sample62	gland cell	1	79.6	ERR12372771	miracell12766007
miracidia_NEB_sample63	other cell	1	56.4	ERR12372772	miracell12766008
miracidia_NEB_sample64	gland cell	1	3.8	ERR12372773	miracell12766009
miracidia_NEB_sample65	gland cell	1	0.1	ERR12372774	miracell12766010
miracidia_NEB_sample66	other cell	1	87.4	ERR12372775	miracell12766011
miracidia_NEB_sample67	gland cell	1	84.3	ERR12372776	miracell12766012
miracidia_NEB_sample68	gland cell	1	73.9	ERR12372777	miracell12766013
miracidia_NEB_sample69	gland cell	1	77.3	ERR13441828	miracell12766014
miracidia_NEB_sample70	other cell	1	79.3	ERR12372779	miracell12766015
miracidia_NEB_sample71	other cell	1	81.1	ERR13441829	miracell12766016
miracidia_NEB_sample72	other cell	1	71.7	ERR12372781	miracell12766017
miracidia_NEB_sample73	other cell	1	81.2	ERR12372782	miracell12766018
miracidia_NEB_sample74	gland cell	1	71	ERR12372783	miracell12766019
miracidia_NEB_sample75	gland cell	1	83.8	ERR12372784	miracell12766020
miracidia_NEB_sample76	gland cell	1	84.4	ERR12372785	miracell12766021
miracidia_NEB_sample77	gland cell	1	78.3	ERR12372786	miracell12766022
miracidia_NEB_sample78	other cell	1	83	ERR12372787	miracell12766023
miracidia_NEB_sample79	gland cell	1	87.5	ERR12372788	miracell12766024
miracidia_NEB_sample80	gland cell	1	10.6	ERR12372789	miracell12766025
miracidia_NEB_sample81	gland cell	6	79.5	ERR12372790	miracell12766026
miracidia_NEB_sample82	ciliary plate	1	69	ERR13441830	miracell12766027
miracidia_NEB_sample83	ciliary plate	10	83.2	ERR13441831	miracell12766028
miracidia_NEB_sample84	ciliary plate	10	79.1	ERR12372793	miracell12766029
miracidia_NEB_sample85	ciliary plate	10	68.1	ERR12372794	miracell12766030
miracidia_NEB_sample86	ciliary plate	1	58.1	ERR12372795	miracell12766031
miracidia_NEB_sample87	ciliary plate	1	77.2	ERR12372796	miracell12766032
miracidia_NEB_sample88	ciliary plate	1	48.9	ERR12372797	miracell12766033
miracidia_NEB_sample89	ciliary plate	1	54.4	ERR12372798	miracell12766034
miracidia_NEB_sample90	ciliary plate	10	71.5	ERR12372799	miracell12766035
miracidia_NEB_sample91	ciliary plate	1	67.6	ERR12372800	miracell12766036
miracidia_NEB_sample92	other cell	1	81.3	ERR12372801	miracell12766037
miracidia_NEB_sample93	gland cell	1	82.4	ERR13441832	miracell12766038
miracidia_NEB_sample94	gland cell	1	86.4	ERR13441833	miracell12766039
miracidia_NEB_sample95	gland cell	1	81.3	ERR12372804	miracell12766040
miracidia_NEB_sample96	gland cell	5	72.1	ERR12372805	miracell12766041

## Sheet: Supp File 1b
Supplementary File 1b - Seurat marker genes in all cell clusters
myAUC	avg_diff	power	avg_log2FC	pct.1	pct.2	cluster	gene	descriptions	description_source	Genome.project	Gene.description	Gene.name	Source.of.gene.name	Chromosome.scaffold.name
0.907	1.43204	0.814	2.06599	0.933	0.197	Muscle 1	Smp_045220	Putative myosin light chain 1	Source:UniProtKB/TrEMBL;Acc:A0A3Q0KF84]	schistosoma_mansoni_prjea36577	Putative myosin light chain 1 [Source:UniProtKB/TrEMBL;Acc:A0A3Q0KF84]			SM_V10_2
0.898	1.35471	0.796	1.95443	0.882	0.123	Muscle 1	Smp_179810	Troponin t, invertebrate, putative	Source:UniProtKB/TrEMBL;Acc:A0A3Q0KTQ3]	schistosoma_mansoni_prjea36577	Troponin t, invertebrate, putative [Source:UniProtKB/TrEMBL;Acc:A0A3Q0KTQ3]			SM_V10_3
0.869	1.18675	0.738	1.71211	0.834	0.112	Muscle 1	Smp_085540	Paramyosin	Source:UniProtKB/TrEMBL;Acc:A0A3Q0KIL4]	schistosoma_mansoni_prjea36577	Paramyosin [Source:UniProtKB/TrEMBL;Acc:A0A3Q0KIL4]	MYH	UniProtKB Gene Name	SM_V10_5
0.85	1.05432	0.7	1.52107	0.856	0.32	Muscle 1	Smp_340760	Tropomyosin-1	Source:UniProtKB/Swiss-Prot;Acc:P42637]	schistosoma_mansoni_prjea36577	Tropomyosin-1 [Source:UniProtKB/Swiss-Prot;Acc:P42637]			SM_V10_1
0.811	0.947349	0.622	1.36674	0.747	0.126	Muscle 1	Smp_347710	Smp_347710	Smp_347710~	schistosoma_mansoni_prjea36577				SM_V10_Z
0.803	0.761553	0.606	1.09869	0.964	0.684	Muscle 1	Smp_341080	HA2 domain-containing protein	Source:UniProtKB/TrEMBL;Acc:A0A5K4FC13]	schistosoma_mansoni_prjea36577	HA2 domain-containing protein [Source:UniProtKB/TrEMBL;Acc:A0A5K4FC13]			SM_V10_4
0.795	0.847744	0.59	1.22304	0.628	0.043	Muscle 1	Smp_052230	Putative kunitz-type protease inhibitor	Source:UniProtKB/TrEMBL;Acc:A0A3Q0KFV5]	schistosoma_mansoni_prjea36577	Putative kunitz-type protease inhibitor [Source:UniProtKB/TrEMBL;Acc:A0A3Q0KFV5]			SM_V10_4
0.786	0.802484	0.572	1.15774	0.624	0.055	Muscle 1	Smp_159600	Putative collagen alpha chain	Source:UniProtKB/TrEMBL;Acc:A0A3Q0KR54]	schistosoma_mansoni_prjea36577	Putative collagen alpha chain [Source:UniProtKB/TrEMBL;Acc:A0A3Q0KR54]			SM_V10_1
0.777	0.765772	0.554	1.10478	0.696	0.184	Muscle 1	Smp_068510	Putative neuronal calcium sensor	Source:UniProtKB/TrEMBL;Acc:A0A3Q0KH73]	schistosoma_mansoni_prjea36577	Putative neuronal calcium sensor [Source:UniProtKB/TrEMBL;Acc:A0A3Q0KH73]			SM_V10_6
0.761	0.73109	0.522	1.05474	0.628	0.128	Muscle 1	Smp_154500	TPR_REGION domain-containing protein	Source:UniProtKB/TrEMBL;Acc:A0A3Q0KQE5]	schistosoma_mansoni_prjea36577	TPR_REGION domain-containing protein [Source:UniProtKB/TrEMBL;Acc:A0A3Q0KQE5]			SM_V10_Z
0.754	0.767537	0.508	1.10732	0.55	0.047	Muscle 1	Smp_138210	SHSP domain-containing protein	Source:UniProtKB/TrEMBL;Acc:A0A3Q0KMT1]	schistosoma_mansoni_prjea36577	SHSP domain-containing protein [Source:UniProtKB/TrEMBL;Acc:A0A3Q0KMT1]			SM_V10_3
0.752	0.714796	0.504	1.03123	0.566	0.071	Muscle 1	Smp_347610	Fe2OG dioxygenase domain-containing protein	Source:UniProtKB/TrEMBL;Acc:A0A5K4FFP2]	schistosoma_mansoni_prjea36577	Fe2OG dioxygenase domain-containing protein [Source:UniProtKB/TrEMBL;Acc:A0A5K4FFP2]			SM_V10_Z
0.746	0.52053	0.492	0.750966	0.83	0.334	Muscle 1	Smp_342190	TRPA	Source:UniProtKB/TrEMBL;Acc:A0A5K4FA45]	schistosoma_mansoni_prjea36577	TRPA [Source:UniProtKB/TrEMBL;Acc:A0A5K4FA45]			SM_V10_5
0.74	0.648563	0.48	0.935679	0.539	0.06	Muscle 1	Smp_031770	Tropomyosin-2	Source:UniProtKB/Swiss-Prot;Acc:P42638]	schistosoma_mansoni_prjea36577	Tropomyosin-2 [Source:UniProtKB/Swiss-Prot;Acc:P42638]			SM_V10_7
0.74	0.631437	0.48	0.910971	0.545	0.063	Muscle 1	Smp_126240	Titin, putative	Source:UniProtKB/TrEMBL;Acc:A0A5K4ELN3]	schistosoma_mansoni_prjea36577	Titin, putative [Source:UniProtKB/TrEMBL;Acc:A0A5K4ELN3]			SM_V10_3
0.726	0.599771	0.452	0.865286	0.541	0.097	Muscle 1	Smp_340130	Calcium-binding protein, putative	Source:UniProtKB/TrEMBL;Acc:A0A5K4FCK1]	schistosoma_mansoni_prjea36577	Calcium-binding protein, putative [Source:UniProtKB/TrEMBL;Acc:A0A5K4FCK1]			SM_V10_6
0.719	0.572074	0.438	0.825328	0.479	0.042	Muscle 1	Smp_132670	Myosin regulatory light chain, putative	Source:UniProtKB/TrEMBL;Acc:G4LUD9]	schistosoma_mansoni_prjea36577	Myosin regulatory light chain, putative [Source:UniProtKB/TrEMBL;Acc:G4LUD9]			SM_V10_1
0.715	0.671094	0.43	0.968184	0.462	0.033	Muscle 1	Smp_307020	Actin-2	Source:UniProtKB/Swiss-Prot;Acc:P53471]	schistosoma_mansoni_prjea36577	Actin-2 [Source:UniProtKB/Swiss-Prot;Acc:P53471]			SM_V10_Z
0.71	0.586532	0.42	0.846187	0.427	0.008	Muscle 1	Smp_314500	Peptidase M12B domain-containing protein	Source:UniProtKB/TrEMBL;Acc:A0A5K4F784]	schistosoma_mansoni_prjea36577	Peptidase M12B domain-containing protein [Source:UniProtKB/TrEMBL;Acc:A0A5K4F784]			SM_V10_3
0.706	0.522253	0.412	0.753452	0.618	0.268	Muscle 1	Smp_072140	Putative rho2 GTPase	Source:UniProtKB/TrEMBL;Acc:G4V9A8]	schistosoma_mansoni_prjea36577	Putative rho2 GTPase [Source:UniProtKB/TrEMBL;Acc:G4V9A8]	Rho2	UniProtKB Gene Name	SM_V10_1
0.703	0.395561	0.406	0.570674	0.814	0.428	Muscle 1	Smp_091460	Glutamine synthetase	Source:UniProtKB/TrEMBL;Acc:G4V9E4]	schistosoma_mansoni_prjea36577	Glutamine synthetase [Source:UniProtKB/TrEMBL;Acc:G4V9E4]			SM_V10_1
0.698	0.482121	0.396	0.695553	0.45	0.051	Muscle 1	Smp_021920	Paramyosin	Source:UniProtKB/TrEMBL;Acc:A0A3Q0KD88]	schistosoma_mansoni_prjea36577	Paramyosin [Source:UniProtKB/TrEMBL;Acc:A0A3Q0KD88]			SM_V10_2
0.695	0.492491	0.39	0.710514	0.521	0.127	Muscle 1	Smp_200190	Dynein light chain	Source:UniProtKB/TrEMBL;Acc:A0A3Q0KV39]	schistosoma_mansoni_prjea36577	Dynein light chain [Source:UniProtKB/TrEMBL;Acc:A0A3Q0KV39]			SM_V10_1
0.694	0.501228	0.388	0.72312	0.516	0.14	Muscle 1	Smp_172460	Krueppel-like factor 10	Source:UniProtKB/TrEMBL;Acc:G4VM64]	schistosoma_mansoni_prjea36577	Krueppel-like factor 10 [Source:UniProtKB/TrEMBL;Acc:G4VM64]			SM_V10_6
0.692	0.498837	0.384	0.719669	0.397	0.015	Muscle 1	Smp_020550	Low-density lipoprotein receptor (Ldl)	Source:UniProtKB/TrEMBL;Acc:A0A3Q0KD55]	schistosoma_mansoni_prjea36577	Low-density lipoprotein receptor (Ldl) [Source:UniProtKB/TrEMBL;Acc:A0A3Q0KD55]			SM_V10_Z
0.692	0.488732	0.384	0.705092	0.427	0.043	Muscle 1	Smp_130280	Cell polarity protein	Source:UniProtKB/TrEMBL;Acc:A0A5K4ELK6]	schistosoma_mansoni_prjea36577	Cell polarity protein [Source:UniProtKB/TrEMBL;Acc:A0A5K4ELK6]			SM_V10_7
0.688	0.458987	0.376	0.662179	0.456	0.081	Muscle 1	Smp_140990	Phosphodiesterase I	Source:UniProtKB/TrEMBL;Acc:A0A3Q0KNA8]	schistosoma_mansoni_prjea36577	Phosphodiesterase I [Source:UniProtKB/TrEMBL;Acc:A0A3Q0KNA8]			SM_V10_4
0.681	0.443323	0.362	0.63958	0.391	0.03	Muscle 1	Smp_151600	Putative neuronal calcium sensor	Source:UniProtKB/TrEMBL;Acc:G4V5N3]	schistosoma_mansoni_prjea36577	Putative neuronal calcium sensor [Source:UniProtKB/TrEMBL;Acc:G4V5N3]			SM_V10_3
0.679	0.429367	0.358	0.619446	0.417	0.062	Muscle 1	Smp_247230	Putative single-stranded DNA-binding protein mssp-1	Source:UniProtKB/TrEMBL;Acc:A0A5K4F1A8]	schistosoma_mansoni_prjea36577	Putative single-stranded DNA-binding protein mssp-1 [Source:UniProtKB/TrEMBL;Acc:A0A5K4F1A8]			SM_V10_3
0.672	0.350074	0.344	0.50505	0.915	0.815	Muscle 1	Smp_043120	Putative universal stress protein	Source:UniProtKB/TrEMBL;Acc:G4VIW9]	schistosoma_mansoni_prjea36577	Putative universal stress protein [Source:UniProtKB/TrEMBL;Acc:G4VIW9]			SM_V10_4
0.663	0.39714	0.326	0.572952	0.337	0.012	Muscle 1	Smp_344460	Ig-like domain-containing protein	Source:UniProtKB/TrEMBL;Acc:A0A5K4FB00]	schistosoma_mansoni_prjea36577	Ig-like domain-containing protein [Source:UniProtKB/TrEMBL;Acc:A0A5K4FB00]			SM_V10_Z
0.662	0.393522	0.324	0.567733	0.446	0.133	Muscle 1	Smp_120700	Cofilin, actophorin, putative	Source:UniProtKB/TrEMBL;Acc:G4LX89]	schistosoma_mansoni_prjea36577	Cofilin, actophorin, putative [Source:UniProtKB/TrEMBL;Acc:G4LX89]			SM_V10_1
0.66	0.389075	0.32	0.561317	0.392	0.076	Muscle 1	Smp_170030	Sh3 domain-binding glutamic acid-rich-like protein	Source:UniProtKB/TrEMBL;Acc:G4VTS1]	schistosoma_mansoni_prjea36577	Sh3 domain-binding glutamic acid-rich-like protein [Source:UniProtKB/TrEMBL;Acc:G4VTS1]			SM_V10_Z
0.66	0.38264	0.32	0.552033	0.327	0.008	Muscle 1	Smp_060030	SMB domain-containing protein	Source:UniProtKB/TrEMBL;Acc:G4VAK5]	schistosoma_mansoni_prjea36577	SMB domain-containing protein [Source:UniProtKB/TrEMBL;Acc:G4VAK5]			SM_V10_1
0.659	0.386854	0.318	0.558112	0.346	0.028	Muscle 1	Smp_006860	PDZ domain-containing protein	Source:UniProtKB/TrEMBL;Acc:G4V896]	schistosoma_mansoni_prjea36577	PDZ domain-containing protein [Source:UniProtKB/TrEMBL;Acc:G4V896]			SM_V10_1
0.656	0.361579	0.312	0.521648	0.353	0.04	Muscle 1	Smp_347460	Calponin-homology (CH) domain-containing protein	Source:UniProtKB/TrEMBL;Acc:A0A5K4FCY1]	schistosoma_mansoni_prjea36577	Calponin-homology (CH) domain-containing protein [Source:UniProtKB/TrEMBL;Acc:A0A5K4FCY1]			SM_V10_7
0.654	0.14653	0.308	0.211398	0.939	0.674	Muscle 1	Smp_003770	Putative histone h1/h5	Source:UniProtKB/TrEMBL;Acc:G4V6K8]	schistosoma_mansoni_prjea36577	Putative histone h1/h5 [Source:UniProtKB/TrEMBL;Acc:G4V6K8]			SM_V10_1
0.653	0.375878	0.306	0.542278	0.324	0.02	Muscle 1	Smp_166960	Putative ubiquitin-protein ligase BRE1	Source:UniProtKB/TrEMBL;Acc:A0A3Q0KS45]	schistosoma_mansoni_prjea36577	Putative ubiquitin-protein ligase BRE1 [Source:UniProtKB/TrEMBL;Acc:A0A3Q0KS45]			SM_V10_2
0.652	0.367843	0.304	0.530686	0.329	0.026	Muscle 1	Smp_122900	Putative beta-arrestin 1	Source:UniProtKB/TrEMBL;Acc:A0A3Q0KKD3]	schistosoma_mansoni_prjea36577	Putative beta-arrestin 1 [Source:UniProtKB/TrEMBL;Acc:A0A3Q0KKD3]			SM_V10_2
0.651	0.375754	0.302	0.542098	0.33	0.028	Muscle 1	Smp_087250	Putative crp1/csrp1/crip1	Source:UniProtKB/TrEMBL;Acc:G4VJG3]	schistosoma_mansoni_prjea36577	Putative crp1/csrp1/crip1 [Source:UniProtKB/TrEMBL;Acc:G4VJG3]			SM_V10_4
0.649	0.41674	0.298	0.601228	0.332	0.033	Muscle 1	Smp_331570	CPXV160 protein	Source:UniProtKB/TrEMBL;Acc:A0A5K4FBL0]	schistosoma_mansoni_prjea36577	CPXV160 protein [Source:UniProtKB/TrEMBL;Acc:A0A5K4FBL0]			SM_V10_6
0.648	0.364152	0.296	0.525361	0.356	0.059	Muscle 1	Smp_038530	Putative map kinase phosphatase	Source:UniProtKB/TrEMBL;Acc:A0A3Q0KEM0]	schistosoma_mansoni_prjea36577	Putative map kinase phosphatase [Source:UniProtKB/TrEMBL;Acc:A0A3Q0KEM0]			SM_V10_Z
0.646	0.289352	0.292	0.417446	0.549	0.247	Muscle 1	Smp_042300	PUR-alpha-like protein	Source:UniProtKB/TrEMBL;Acc:Q9NGC4]	schistosoma_mansoni_prjea36577	PUR-alpha-like protein [Source:UniProtKB/TrEMBL;Acc:Q9NGC4]	PUR-alpha	UniProtKB Gene Name	SM_V10_4
0.646	0.334072	0.292	0.481964	0.352	0.057	Muscle 1	Smp_343700	SH2 domain-containing protein	Source:UniProtKB/TrEMBL;Acc:A0A5K4FCX8]	schistosoma_mansoni_prjea36577	SH2 domain-containing protein [Source:UniProtKB/TrEMBL;Acc:A0A5K4FCX8]			SM_V10_1
0.645	0.277185	0.29	0.399894	0.938	0.898	Muscle 1	Smp_312360	Eukaryotic translation initiation factor 3 subunit G	Source:UniProtKB/TrEMBL;Acc:A0A5K4F5N0]	schistosoma_mansoni_prjea36577	Eukaryotic translation initiation factor 3 subunit G [Source:UniProtKB/TrEMBL;Acc:A0A5K4F5N0]			SM_V10_Z
0.645	0.38164	0.29	0.55059	0.331	0.041	Muscle 1	Smp_018250	Putative troponin I	Source:UniProtKB/TrEMBL;Acc:A0A3Q0KCV6]	schistosoma_mansoni_prjea36577	Putative troponin I [Source:UniProtKB/TrEMBL;Acc:A0A3Q0KCV6]			SM_V10_3
0.645	0.240022	0.29	0.346279	1	0.991	Muscle 1	Smp_122840	Eukaryotic translation initiation factor 5	Source:UniProtKB/TrEMBL;Acc:G4LVM9]	schistosoma_mansoni_prjea36577	Eukaryotic translation initiation factor 5 [Source:UniProtKB/TrEMBL;Acc:G4LVM9]			SM_V10_2
0.641	0.379303	0.282	0.547219	0.323	0.04	Muscle 1	Smp_307010	Actin-2	Source:UniProtKB/Swiss-Prot;Acc:P53471]	schistosoma_mansoni_prjea36577	Actin-2 [Source:UniProtKB/Swiss-Prot;Acc:P53471]			SM_V10_Z
0.64	0.347879	0.28	0.501884	0.291	0.011	Muscle 1	Smp_166180	DCD domain-containing protein	Source:UniProtKB/TrEMBL;Acc:A0A5K4EWT0]	schistosoma_mansoni_prjea36577	DCD domain-containing protein [Source:UniProtKB/TrEMBL;Acc:A0A5K4EWT0]			SM_V10_4
0.64	0.327356	0.28	0.472275	0.394	0.108	Muscle 1	Smp_348090	Smp_348090	Smp_348090~	schistosoma_mansoni_prjea36577				SM_V10_4
0.638	0.313086	0.276	0.451687	0.298	0.022	Muscle 1	Smp_343680	protein-tyrosine-phosphatase	Source:UniProtKB/TrEMBL;Acc:A0A5K4FCX3]	schistosoma_mansoni_prjea36577	protein-tyrosine-phosphatase [Source:UniProtKB/TrEMBL;Acc:A0A5K4FCX3]			SM_V10_5
0.637	0.301897	0.274	0.435545	0.829	0.692	Muscle 1	Smp_019060	Protein transport protein Sec61 subunit beta	Source:UniProtKB/TrEMBL;Acc:G4VG47]	schistosoma_mansoni_prjea36577	Protein transport protein Sec61 subunit beta [Source:UniProtKB/TrEMBL;Acc:G4VG47]			SM_V10_3
0.636	0.274821	0.272	0.396483	0.358	0.078	Muscle 1	Smp_311170	PDZ domain-containing protein	Source:UniProtKB/TrEMBL;Acc:A0A5K4F5C9]	schistosoma_mansoni_prjea36577	PDZ domain-containing protein [Source:UniProtKB/TrEMBL;Acc:A0A5K4F5C9]			SM_V10_2
0.635	0.324847	0.27	0.468656	0.275	0.006	Muscle 1	Smp_133830	Smp_133830	Smp_133830~	schistosoma_mansoni_prjea36577				SM_V10_Z
0.635	0.314453	0.27	0.453659	0.398	0.128	Muscle 1	Smp_340630	HATPase_c domain-containing protein	Source:UniProtKB/TrEMBL;Acc:A0A5K4FAB9]	schistosoma_mansoni_prjea36577	HATPase_c domain-containing protein [Source:UniProtKB/TrEMBL;Acc:A0A5K4FAB9]			SM_V10_3
0.633	0.303228	0.266	0.437466	0.295	0.029	Muscle 1	Smp_078690	Calponin	Source:UniProtKB/TrEMBL;Acc:G4LUS0]	schistosoma_mansoni_prjea36577	Calponin [Source:UniProtKB/TrEMBL;Acc:G4LUS0]			SM_V10_1
0.632	0.308718	0.264	0.445386	0.295	0.031	Muscle 1	Smp_267090	F-spondin	Source:UniProtKB/TrEMBL;Acc:A0A5K4F1R4]	schistosoma_mansoni_prjea36577	F-spondin [Source:UniProtKB/TrEMBL;Acc:A0A5K4F1R4]			SM_V10_6
0.628	0.278969	0.256	0.402467	0.27	0.014	Muscle 1	Smp_336620	Neur_chan_LBD domain-containing protein	Source:UniProtKB/TrEMBL;Acc:A0A5K4FB25]	schistosoma_mansoni_prjea36577	Neur_chan_LBD domain-containing protein [Source:UniProtKB/TrEMBL;Acc:A0A5K4FB25]			SM_V10_1
0.626	0.307863	0.252	0.444152	0.805	0.679	Muscle 1	Smp_017430	Tetraspanin	Source:UniProtKB/TrEMBL;Acc:G4LW70]	schistosoma_mansoni_prjea36577	Tetraspanin [Source:UniProtKB/TrEMBL;Acc:G4LW70]			SM_V10_1
0.626	0.240373	0.252	0.346785	0.943	0.869	Muscle 1	Smp_009760	14-3-3 protein homolog 1	Source:UniProtKB/Swiss-Prot;Acc:Q26540]	schistosoma_mansoni_prjea36577	14-3-3 protein homolog 1 [Source:UniProtKB/Swiss-Prot;Acc:Q26540]			SM_V10_1
0.625	0.296182	0.25	0.4273	0.678	0.506	Muscle 1	Smp_054560	Huntingtin interacting protein-related	Source:UniProtKB/TrEMBL;Acc:G4VQH5]	schistosoma_mansoni_prjea36577	Huntingtin interacting protein-related [Source:UniProtKB/TrEMBL;Acc:G4VQH5]			SM_V10_Z
0.624	0.272635	0.248	0.393329	0.305	0.052	Muscle 1	Smp_153170	Serine/threonine kinase	Source:UniProtKB/TrEMBL;Acc:A0A3Q0KQ72]	schistosoma_mansoni_prjea36577	Serine/threonine kinase [Source:UniProtKB/TrEMBL;Acc:A0A3Q0KQ72]			SM_V10_Z
0.623	0.306278	0.246	0.441865	0.253	0.008	Muscle 1	Smp_334130	Tripartite motif-containing protein 2	Source:UniProtKB/TrEMBL;Acc:A0A5K4F871]	schistosoma_mansoni_prjea36577	Tripartite motif-containing protein 2 [Source:UniProtKB/TrEMBL;Acc:A0A5K4F871]			SM_V10_4
0.622	0.258994	0.244	0.37365	0.367	0.115	Muscle 1	Smp_044060	Phosphodiesterase	Source:UniProtKB/TrEMBL;Acc:A0A3Q0KF67]	schistosoma_mansoni_prjea36577	Phosphodiesterase [Source:UniProtKB/TrEMBL;Acc:A0A3Q0KF67]			SM_V10_1
0.621	0.27924	0.242	0.402859	0.251	0.009	Muscle 1	Smp_081470	Smp_081470	Smp_081470~	schistosoma_mansoni_prjea36577				SM_V10_Z
0.62	0.277224	0.24	0.39995	0.251	0.01	Muscle 1	Smp_155320	Tetraspanin	Source:UniProtKB/TrEMBL;Acc:A0A3Q0KQI4]	schistosoma_mansoni_prjea36577	Tetraspanin [Source:UniProtKB/TrEMBL;Acc:A0A3Q0KQI4]			SM_V10_1
0.618	0.284057	0.236	0.409808	0.557	0.361	Muscle 1	Smp_023840	Zf-CHCC domain-containing protein	Source:UniProtKB/TrEMBL;Acc:A0A3Q0KDC8]	schistosoma_mansoni_prjea36577	Zf-CHCC domain-containing protein [Source:UniProtKB/TrEMBL;Acc:A0A3Q0KDC8]			SM_V10_1
0.616	0.295122	0.232	0.425771	0.678	0.523	Muscle 1	Smp_335675	Smp_335675	Smp_335675~	schistosoma_mansoni_prjea36577				SM_V10_Z
0.616	0.261481	0.232	0.377238	0.516	0.3	Muscle 1	Smp_202690	Smp_202690	Source:UniProtKB/TrEMBL;Acc:A0A3Q0KV25]	schistosoma_mansoni_prjea36577	Smp_202690 [Source:UniProtKB/TrEMBL;Acc:A0A3Q0KV25]			SM_V10_4
0.616	0.185594	0.232	0.267755	0.984	0.959	Muscle 1	Smp_334080	Tr-type G domain-containing protein	Source:UniProtKB/TrEMBL;Acc:A0A5K4F8X9]	schistosoma_mansoni_prjea36577	Tr-type G domain-containing protein [Source:UniProtKB/TrEMBL;Acc:A0A5K4F8X9]			SM_V10_4
0.615	0.283601	0.23	0.409149	0.585	0.413	Muscle 1	Smp_152370	Putative arf gtpase-activating protein	Source:UniProtKB/TrEMBL;Acc:A0A3Q0KQ26]	schistosoma_mansoni_prjea36577	Putative arf gtpase-activating protein [Source:UniProtKB/TrEMBL;Acc:A0A3Q0KQ26]			SM_V10_Z
0.615	0.24685	0.23	0.356129	0.242	0.013	Muscle 1	Smp_318000	Smp_318000	Smp_318000~	schistosoma_mansoni_prjea36577				SM_V10_7
0.614	0.26612	0.228	0.38393	0.259	0.031	Muscle 1	Smp_213900	Collagen IV NC1 domain-containing protein	Source:UniProtKB/TrEMBL;Acc:A0A5K4F2I7]	schistosoma_mansoni_prjea36577	Collagen IV NC1 domain-containing protein [Source:UniProtKB/TrEMBL;Acc:A0A5K4F2I7]			SM_V10_1
0.613	0.277742	0.226	0.400697	0.246	0.02	Muscle 1	Smp_142860	Fucosyltransferase	Source:UniProtKB/TrEMBL;Acc:A0A3Q0KNN7]	schistosoma_mansoni_prjea36577	Fucosyltransferase [Source:UniProtKB/TrEMBL;Acc:A0A3Q0KNN7]	FucTF	UniProtKB Gene Name	SM_V10_Z
0.612	0.259746	0.224	0.374734	0.432	0.217	Muscle 1	Smp_055900	Leptin receptor overlapping transcript-like 1	Source:UniProtKB/TrEMBL;Acc:G4M1N9]	schistosoma_mansoni_prjea36577	Leptin receptor overlapping transcript-like 1 [Source:UniProtKB/TrEMBL;Acc:G4M1N9]			SM_V10_Z
0.611	0.21853	0.222	0.315272	0.43	0.207	Muscle 1	Smp_151020	Putative transmembrane protein 17	Source:UniProtKB/TrEMBL;Acc:G4VHQ1]	schistosoma_mansoni_prjea36577	Putative transmembrane protein 17 [Source:UniProtKB/TrEMBL;Acc:G4VHQ1]			SM_V10_4
0.611	0.235859	0.222	0.340273	0.803	0.699	Muscle 1	Smp_301620	14-3-3 protein, putative	Source:UniProtKB/TrEMBL;Acc:G4LUI7]	schistosoma_mansoni_prjea36577	14-3-3 protein, putative [Source:UniProtKB/TrEMBL;Acc:G4LUI7]			SM_V10_1
0.61	0.254245	0.22	0.366798	0.233	0.014	Muscle 1	Smp_242240	IGFBP N-terminal domain-containing protein	Source:UniProtKB/TrEMBL;Acc:A0A5K4EZV8]	schistosoma_mansoni_prjea36577	IGFBP N-terminal domain-containing protein [Source:UniProtKB/TrEMBL;Acc:A0A5K4EZV8]			SM_V10_2
0.609	0.249763	0.218	0.360333	0.228	0.011	Muscle 1	Smp_045300	PDZ domain-containing protein	Source:UniProtKB/TrEMBL;Acc:A0A3Q0KF90]	schistosoma_mansoni_prjea36577	PDZ domain-containing protein [Source:UniProtKB/TrEMBL;Acc:A0A3Q0KF90]			SM_V10_2
0.608	0.247873	0.216	0.357606	0.235	0.018	Muscle 1	Smp_086330	Transgelin	Source:UniProtKB/TrEMBL;Acc:G4M0V2]	schistosoma_mansoni_prjea36577	Transgelin [Source:UniProtKB/TrEMBL;Acc:G4M0V2]			SM_V10_Z
0.606	0.243638	0.212	0.351496	0.241	0.028	Muscle 1	Smp_212410	Cyclic nucleotide-binding domain-containing protein	Source:UniProtKB/TrEMBL;Acc:A0A3Q0KVG7]	schistosoma_mansoni_prjea36577	Cyclic nucleotide-binding domain-containing protein [Source:UniProtKB/TrEMBL;Acc:A0A3Q0KVG7]			SM_V10_3
0.604	0.229283	0.208	0.330786	0.221	0.013	Muscle 1	Smp_039300	Putative trim56 protein	Source:UniProtKB/TrEMBL;Acc:A0A3Q0KEN9]	schistosoma_mansoni_prjea36577	Putative trim56 protein [Source:UniProtKB/TrEMBL;Acc:A0A3Q0KEN9]			SM_V10_2
0.603	0.234537	0.206	0.338366	0.224	0.019	Muscle 1	Smp_344820	Nesprin-1	Source:UniProtKB/TrEMBL;Acc:A0A5K4FED1]	schistosoma_mansoni_prjea36577	Nesprin-1 [Source:UniProtKB/TrEMBL;Acc:A0A5K4FED1]			SM_V10_Z
0.603	0.232353	0.206	0.335214	0.247	0.041	Muscle 1	Smp_315780	SH2 domain-containing protein	Source:UniProtKB/TrEMBL;Acc:A0A5K4F7I0]	schistosoma_mansoni_prjea36577	SH2 domain-containing protein [Source:UniProtKB/TrEMBL;Acc:A0A5K4F7I0]			SM_V10_7
0.602	0.361117	0.204	0.520982	0.211	0.008	Muscle 1	Smp_015820	Putative notum	Source:UniProtKB/TrEMBL;Acc:A0A3Q0KCP5]	schistosoma_mansoni_prjea36577	Putative notum [Source:UniProtKB/TrEMBL;Acc:A0A3Q0KCP5]			SM_V10_Z
0.602	0.209969	0.204	0.302921	0.312	0.102	Muscle 1	Smp_343280	G_PROTEIN_RECEP_F3_4 domain-containing protein	Source:UniProtKB/TrEMBL;Acc:A0A5K4FAI6]	schistosoma_mansoni_prjea36577	G_PROTEIN_RECEP_F3_4 domain-containing protein [Source:UniProtKB/TrEMBL;Acc:A0A5K4FAI6]			SM_V10_1
0.601	0.272038	0.202	0.392468	0.346	0.153	Muscle 1	Smp_180690	Putative tiptop	Source:UniProtKB/TrEMBL;Acc:A0A3Q0KUD5]	schistosoma_mansoni_prjea36577	Putative tiptop [Source:UniProtKB/TrEMBL;Acc:A0A3Q0KUD5]			SM_V10_Z
0.601	0.263542	0.202	0.380211	0.229	0.026	Muscle 1	Smp_245840	Protocadherin-11 Y-linked	Source:UniProtKB/TrEMBL;Acc:A0A5K4F0X0]	schistosoma_mansoni_prjea36577	Protocadherin-11 Y-linked [Source:UniProtKB/TrEMBL;Acc:A0A5K4F0X0]			SM_V10_2
0.601	0.135006	0.202	0.194773	1	0.999	Muscle 1	Smp_072330	Putative heat shock protein	Source:UniProtKB/TrEMBL;Acc:A0A3Q0KHG3]	schistosoma_mansoni_prjea36577	Putative heat shock protein [Source:UniProtKB/TrEMBL;Acc:A0A3Q0KHG3]			SM_V10_1
0.6	0.251212	0.2	0.362422	0.215	0.014	Muscle 1	Smp_147680	Putative ef hand containing protein	Source:UniProtKB/TrEMBL;Acc:A0A3Q0KPD3]	schistosoma_mansoni_prjea36577	Putative ef hand containing protein [Source:UniProtKB/TrEMBL;Acc:A0A3Q0KPD3]			SM_V10_2
0.6	0.219426	0.2	0.316565	0.221	0.02	Muscle 1	Smp_125730	LIM zinc-binding domain-containing protein	Source:UniProtKB/TrEMBL;Acc:A0A5K4EKT2]	schistosoma_mansoni_prjea36577	LIM zinc-binding domain-containing protein [Source:UniProtKB/TrEMBL;Acc:A0A5K4EKT2]			SM_V10_1
0.6	0.225963	0.2	0.325995	0.223	0.023	Muscle 1	Smp_012810	Putative four and A half lim domains	Source:UniProtKB/TrEMBL;Acc:A0A3Q0KCF3]	schistosoma_mansoni_prjea36577	Putative four and A half lim domains [Source:UniProtKB/TrEMBL;Acc:A0A3Q0KCF3]			SM_V10_1
0.599	0.227022	0.198	0.327524	0.52	0.355	Muscle 1	Smp_317130	V-type proton ATPase subunit	Source:UniProtKB/TrEMBL;Acc:A0A146MIG6]	schistosoma_mansoni_prjea36577	V-type proton ATPase subunit [Source:UniProtKB/TrEMBL;Acc:A0A146MIG6]			SM_V10_6
0.599	0.227717	0.198	0.328527	0.414	0.22	Muscle 1	Smp_034940	Centromere protein F	Source:UniProtKB/TrEMBL;Acc:A0A3Q0KEB6]	schistosoma_mansoni_prjea36577	Centromere protein F [Source:UniProtKB/TrEMBL;Acc:A0A3Q0KEB6]			SM_V10_1
0.599	0.193544	0.198	0.279225	0.974	0.924	Muscle 1	Smp_035200	Putative hsp40, subfamily A, members 1,2,4	Source:UniProtKB/TrEMBL;Acc:G4V805]	schistosoma_mansoni_prjea36577	Putative hsp40, subfamily A, members 1,2,4 [Source:UniProtKB/TrEMBL;Acc:G4V805]			SM_V10_1
0.598	0.178855	0.196	0.258034	0.976	0.934	Muscle 1	Smp_038560	Smp_038560	Smp_038560~	schistosoma_mansoni_prjea36577				SM_V10_Z
0.598	0.209912	0.196	0.302838	0.235	0.038	Muscle 1	Smp_018440	Homeobox domain-containing protein	Source:UniProtKB/TrEMBL;Acc:A0A3Q0KCX5]	schistosoma_mansoni_prjea36577	Homeobox domain-containing protein [Source:UniProtKB/TrEMBL;Acc:A0A3Q0KCX5]			SM_V10_3
0.597	0.195948	0.194	0.282693	0.347	0.147	Muscle 1	Smp_307650	Tyrosinase_Cu-bd domain-containing protein	Source:UniProtKB/TrEMBL;Acc:A0A5K4F4P6]	schistosoma_mansoni_prjea36577	Tyrosinase_Cu-bd domain-containing protein [Source:UniProtKB/TrEMBL;Acc:A0A5K4F4P6]			SM_V10_3
0.597	0.232488	0.194	0.335409	0.207	0.013	Muscle 1	Smp_170340	Putative collagen alpha-1(V) chain	Source:UniProtKB/TrEMBL;Acc:G4V8A8]	schistosoma_mansoni_prjea36577	Putative collagen alpha-1(V) chain [Source:UniProtKB/TrEMBL;Acc:G4V8A8]			SM_V10_1
0.596	0.202309	0.192	0.29187	0.221	0.03	Muscle 1	Smp_314740	Non-specific serine/threonine protein kinase	Source:UniProtKB/TrEMBL;Acc:A0A5K4F7A4]	schistosoma_mansoni_prjea36577	Non-specific serine/threonine protein kinase [Source:UniProtKB/TrEMBL;Acc:A0A5K4F7A4]			SM_V10_5
0.596	0.227885	0.192	0.328769	0.197	0.005	Muscle 1	Smp_325790	Smp_325790	Smp_325790~	schistosoma_mansoni_prjea36577				SM_V10_3
0.594	0.18877	0.188	0.272337	0.359	0.165	Muscle 1	Smp_038950	L-lactate dehydrogenase	Source:UniProtKB/TrEMBL;Acc:G4VQZ5]	schistosoma_mansoni_prjea36577	L-lactate dehydrogenase [Source:UniProtKB/TrEMBL;Acc:G4VQZ5]			SM_V10_Z
0.594	0.203748	0.188	0.293947	0.21	0.022	Muscle 1	Smp_057530	Subfamily S9B unassigned peptidase (S09 family)	Source:UniProtKB/TrEMBL;Acc:A0A3Q0KGB9]	schistosoma_mansoni_prjea36577	Subfamily S9B unassigned peptidase (S09 family) [Source:UniProtKB/TrEMBL;Acc:A0A3Q0KGB9]			SM_V10_7
0.593	0.201306	0.186	0.290423	0.205	0.019	Muscle 1	Smp_121780	Serine/threonine kinase	Source:UniProtKB/TrEMBL;Acc:A0A3Q0KKC3]	schistosoma_mansoni_prjea36577	Serine/threonine kinase [Source:UniProtKB/TrEMBL;Acc:A0A3Q0KKC3]			SM_V10_3
0.592	0.190716	0.184	0.275145	0.242	0.056	Muscle 1	Smp_306980	Innexin	Source:UniProtKB/TrEMBL;Acc:A0A5K4F4I8]	schistosoma_mansoni_prjea36577	Innexin [Source:UniProtKB/TrEMBL;Acc:A0A5K4F4I8]	inx	UniProtKB Gene Name	SM_V10_Z
0.591	0.21093	0.182	0.304308	0.209	0.027	Muscle 1	Smp_303910	Titin	Source:UniProtKB/TrEMBL;Acc:A0A5K4F423]	schistosoma_mansoni_prjea36577	Titin [Source:UniProtKB/TrEMBL;Acc:A0A5K4F423]			SM_V10_Z
0.591	0.192182	0.182	0.27726	0.245	0.061	Muscle 1	Smp_059570	GTP-binding protein GEM	Source:UniProtKB/TrEMBL;Acc:A0A3Q0KGH9]	schistosoma_mansoni_prjea36577	GTP-binding protein GEM [Source:UniProtKB/TrEMBL;Acc:A0A3Q0KGH9]			SM_V10_6
0.591	0.196043	0.182	0.28283	0.234	0.049	Muscle 1	Smp_344810	Smp_344810	Smp_344810~	schistosoma_mansoni_prjea36577				SM_V10_6
0.591	0.199371	0.182	0.287632	0.552	0.398	Muscle 1	Smp_036220	Histone H2B	Source:UniProtKB/TrEMBL;Acc:G4V6E9]	schistosoma_mansoni_prjea36577	Histone H2B [Source:UniProtKB/TrEMBL;Acc:G4V6E9]			SM_V10_1
0.59	0.172489	0.18	0.24885	0.351	0.165	Muscle 1	Smp_034420	DIF_6; DIF_6; DIF_6; Putative cystatin; Putative cystatin	Source:UniProtKB/TrEMBL;Acc:B8Y6H4]	schistosoma_mansoni_prjea36577	DIF_6; DIF_6; DIF_6; Putative cystatin; Putative cystatin [Source:UniProtKB/TrEMBL;Acc:B8Y6H4]			SM_V10_2
0.59	0.21675	0.18	0.312704	0.505	0.355	Muscle 1	Smp_014290	Smp_014290	Smp_014290~	schistosoma_mansoni_prjea36577				SM_V10_1
0.59	0.184698	0.18	0.266463	0.238	0.055	Muscle 1	Smp_245820	Kettin/titin-related protein	Source:UniProtKB/TrEMBL;Acc:A0A5K4F288]	schistosoma_mansoni_prjea36577	Kettin/titin-related protein [Source:UniProtKB/TrEMBL;Acc:A0A5K4F288]			SM_V10_1
0.588	0.165447	0.176	0.23869	0.201	0.025	Muscle 1	Smp_129230	Subfamily S1A unassigned peptidase (S01 family)	Source:UniProtKB/TrEMBL;Acc:A0A3Q0KLE4]	schistosoma_mansoni_prjea36577	Subfamily S1A unassigned peptidase (S01 family) [Source:UniProtKB/TrEMBL;Acc:A0A3Q0KLE4]	SP4	UniProtKB Gene Name	SM_V10_5
0.588	0.192116	0.176	0.277166	0.714	0.621	Muscle 1	Smp_056780	Dynein light chain roadblock	Source:UniProtKB/TrEMBL;Acc:Q15ET8]	schistosoma_mansoni_prjea36577	Dynein light chain roadblock [Source:UniProtKB/TrEMBL;Acc:Q15ET8]			SM_V10_5
0.588	0.189056	0.176	0.272751	0.187	0.01	Muscle 1	Smp_136920	Putative n-acetylgalactosaminyltransferase	Source:UniProtKB/TrEMBL;Acc:G4VHC4]	schistosoma_mansoni_prjea36577	Putative n-acetylgalactosaminyltransferase [Source:UniProtKB/TrEMBL;Acc:G4VHC4]			SM_V10_4
0.587	0.191228	0.174	0.275884	0.194	0.021	Muscle 1	Smp_035210	Paramyosin	Source:UniProtKB/TrEMBL;Acc:A0A3Q0KEE5]	schistosoma_mansoni_prjea36577	Paramyosin [Source:UniProtKB/TrEMBL;Acc:A0A3Q0KEE5]			SM_V10_1
0.586	0.221211	0.172	0.319139	0.567	0.453	Muscle 1	Smp_350070	Protein BRICK1	Source:UniProtKB/TrEMBL;Acc:A0A146MHZ9]	schistosoma_mansoni_prjea36577	Protein BRICK1 [Source:UniProtKB/TrEMBL;Acc:A0A146MHZ9]			SM_V10_3
0.586	0.19696	0.172	0.284153	0.267	0.096	Muscle 1	Smp_094330	Putative abc transporter	Source:UniProtKB/TrEMBL;Acc:A0A3Q0KJB4]	schistosoma_mansoni_prjea36577	Putative abc transporter [Source:UniProtKB/TrEMBL;Acc:A0A3Q0KJB4]			SM_V10_1
0.585	0.182498	0.17	0.263289	0.177	0.007	Muscle 1	Smp_011700	receptor protein-tyrosine kinase	Source:UniProtKB/TrEMBL;Acc:A0A3Q0KCC2]	schistosoma_mansoni_prjea36577	receptor protein-tyrosine kinase [Source:UniProtKB/TrEMBL;Acc:A0A3Q0KCC2]			SM_V10_Z
0.585	0.195073	0.17	0.28143	0.196	0.026	Muscle 1	Smp_142880	Rho-GAP domain-containing protein	Source:UniProtKB/TrEMBL;Acc:A0A3Q0KNL3]	schistosoma_mansoni_prjea36577	Rho-GAP domain-containing protein [Source:UniProtKB/TrEMBL;Acc:A0A3Q0KNL3]			SM_V10_Z
0.585	0.194953	0.17	0.281258	0.55	0.415	Muscle 1	Smp_203170	Dolichyl-diphosphooligosaccharide--protein glycosyltransferase subunit 4	Source:UniProtKB/TrEMBL;Acc:G4VMC8]	schistosoma_mansoni_prjea36577	Dolichyl-diphosphooligosaccharide--protein glycosyltransferase subunit 4 [Source:UniProtKB/TrEMBL;Acc:G4VMC8]			SM_V10_6
0.585	0.185402	0.17	0.267479	0.224	0.053	Muscle 1	Smp_343120	Calcium-transporting ATPase	Source:UniProtKB/TrEMBL;Acc:A0A5K4FAG2]	schistosoma_mansoni_prjea36577	Calcium-transporting ATPase [Source:UniProtKB/TrEMBL;Acc:A0A5K4FAG2]			SM_V10_4
0.584	0.189281	0.168	0.273074	0.205	0.038	Muscle 1	Smp_307880	VWFA domain-containing protein	Source:UniProtKB/TrEMBL;Acc:A0A5K4F679]	schistosoma_mansoni_prjea36577	VWFA domain-containing protein [Source:UniProtKB/TrEMBL;Acc:A0A5K4F679]			SM_V10_3
0.584	0.195626	0.168	0.282229	0.213	0.044	Muscle 1	Smp_065180	Eh domain containing/past-1-related	Source:UniProtKB/TrEMBL;Acc:A0A3Q0KGY0]	schistosoma_mansoni_prjea36577	Eh domain containing/past-1-related [Source:UniProtKB/TrEMBL;Acc:A0A3Q0KGY0]			SM_V10_2
0.584	0.199575	0.168	0.287926	0.176	0.007	Muscle 1	Smp_065210	Pre-mRNA-splicing factor SYF2	Source:UniProtKB/TrEMBL;Acc:G4VCS4]	schistosoma_mansoni_prjea36577	Pre-mRNA-splicing factor SYF2 [Source:UniProtKB/TrEMBL;Acc:G4VCS4]			SM_V10_2
0.583	0.17404	0.166	0.251087	0.211	0.044	Muscle 1	Smp_153700	Protein phosphatase 1 binding protein, putative	Source:UniProtKB/TrEMBL;Acc:A0A3Q0KQ98]	schistosoma_mansoni_prjea36577	Protein phosphatase 1 binding protein, putative [Source:UniProtKB/TrEMBL;Acc:A0A3Q0KQ98]			SM_V10_Z
0.582	0.186141	0.164	0.268544	0.192	0.027	Muscle 1	Smp_039810	Muscleblind-like protein	Source:UniProtKB/TrEMBL;Acc:G4VSJ1]	schistosoma_mansoni_prjea36577	Muscleblind-like protein [Source:UniProtKB/TrEMBL;Acc:G4VSJ1]			SM_V10_Z
0.582	0.169764	0.164	0.244917	0.259	0.091	Muscle 1	Smp_005880	phosphoenolpyruvate carboxykinase (GTP)	Source:UniProtKB/TrEMBL;Acc:G4V721]	schistosoma_mansoni_prjea36577	phosphoenolpyruvate carboxykinase (GTP) [Source:UniProtKB/TrEMBL;Acc:G4V721]			SM_V10_7
0.582	0.211282	0.164	0.304815	0.571	0.467	Muscle 1	Smp_071000	26S proteasome complex subunit SEM1	Source:UniProtKB/TrEMBL;Acc:G4VJ62]	schistosoma_mansoni_prjea36577	26S proteasome complex subunit SEM1 [Source:UniProtKB/TrEMBL;Acc:G4VJ62]			SM_V10_4
0.582	0.183774	0.164	0.265129	0.181	0.018	Muscle 1	Smp_193610	G_PROTEIN_RECEP_F1_2 domain-containing protein	Source:UniProtKB/TrEMBL;Acc:A0A3Q0KUA8]	schistosoma_mansoni_prjea36577	G_PROTEIN_RECEP_F1_2 domain-containing protein [Source:UniProtKB/TrEMBL;Acc:A0A3Q0KUA8]			SM_V10_1
0.581	0.146912	0.162	0.211949	0.972	0.924	Muscle 1	Smp_008070	Thioredoxin; Thioredoxin; Thioredoxin, Trx1	Source:UniProtKB/TrEMBL;Acc:Q8T9N5]	schistosoma_mansoni_prjea36577	Thioredoxin; Thioredoxin; Thioredoxin, Trx1 [Source:UniProtKB/TrEMBL;Acc:Q8T9N5]			SM_V10_7
0.581	0.204799	0.162	0.295462	0.443	0.305	Muscle 1	Smp_053230	NADH-cytochrome b5 reductase	Source:UniProtKB/TrEMBL;Acc:G4LXR9]	schistosoma_mansoni_prjea36577	NADH-cytochrome b5 reductase [Source:UniProtKB/TrEMBL;Acc:G4LXR9]			SM_V10_4
0.58	0.128019	0.16	0.184693	0.989	0.964	Muscle 1	Smp_009310	HABP4_PAI-RBP1 domain-containing protein	Source:UniProtKB/TrEMBL;Acc:G4VL28]	schistosoma_mansoni_prjea36577	HABP4_PAI-RBP1 domain-containing protein [Source:UniProtKB/TrEMBL;Acc:G4VL28]	AUT1	UniProtKB Gene Name	SM_V10_6
0.58	0.200158	0.16	0.288767	0.178	0.019	Muscle 1	Smp_168730	Carbonic anhydrase	Source:UniProtKB/TrEMBL;Acc:A0A3Q0KSG2]	schistosoma_mansoni_prjea36577	Carbonic anhydrase [Source:UniProtKB/TrEMBL;Acc:A0A3Q0KSG2]			SM_V10_6
0.58	0.182605	0.16	0.263444	0.267	0.109	Muscle 1	Smp_337610	RUN domain-containing protein	Source:UniProtKB/TrEMBL;Acc:A0A5K4F983]	schistosoma_mansoni_prjea36577	RUN domain-containing protein [Source:UniProtKB/TrEMBL;Acc:A0A5K4F983]			SM_V10_2
0.58	0.152399	0.16	0.219865	0.24	0.075	Muscle 1	Smp_176310	Acetylcholine-gated chloride channel subunit	Source:UniProtKB/TrEMBL;Acc:G4M0G9]	schistosoma_mansoni_prjea36577	Acetylcholine-gated chloride channel subunit [Source:UniProtKB/TrEMBL;Acc:G4M0G9]	ACC-1	UniProtKB Gene Name	SM_V10_2
0.58	0.144186	0.16	0.208016	0.542	0.384	Muscle 1	Smp_200090	Smp_200090	Smp_200090~	schistosoma_mansoni_prjea36577				SM_V10_1
0.579	0.187584	0.158	0.270627	0.438	0.301	Muscle 1	Smp_350010	Smp_350010	Smp_350010~	schistosoma_mansoni_prjea36577				SM_V10_4
0.579	0.183501	0.158	0.264736	0.194	0.035	Muscle 1	Smp_132210	F-box domain-containing protein	Source:UniProtKB/TrEMBL;Acc:G4VGQ1]	schistosoma_mansoni_prjea36577	F-box domain-containing protein [Source:UniProtKB/TrEMBL;Acc:G4VGQ1]			SM_V10_3
0.579	0.179559	0.158	0.259049	0.181	0.024	Muscle 1	Smp_302360	Gelsolin-like domain-containing protein	Source:UniProtKB/TrEMBL;Acc:A0A5K4F397]	schistosoma_mansoni_prjea36577	Gelsolin-like domain-containing protein [Source:UniProtKB/TrEMBL;Acc:A0A5K4F397]			SM_V10_1
0.578	0.196212	0.156	0.283074	0.606	0.5	Muscle 1	Smp_129420	Putative 28s ribosomal protein S11	Source:UniProtKB/TrEMBL;Acc:G4VH52]	schistosoma_mansoni_prjea36577	Putative 28s ribosomal protein S11 [Source:UniProtKB/TrEMBL;Acc:G4VH52]			SM_V10_3
0.578	0.173097	0.156	0.249727	0.176	0.02	Muscle 1	Smp_075770	Myb-like protein AA	Source:UniProtKB/TrEMBL;Acc:A0A3Q0KHX9]	schistosoma_mansoni_prjea36577	Myb-like protein AA [Source:UniProtKB/TrEMBL;Acc:A0A3Q0KHX9]			SM_V10_1
0.578	0.0618611	0.156	0.0892467	0.919	0.834	Muscle 1	Smp_056970	Glyceraldehyde-3-phosphate dehydrogenase	Source:UniProtKB/Swiss-Prot;Acc:P20287]	schistosoma_mansoni_prjea36577	Glyceraldehyde-3-phosphate dehydrogenase [Source:UniProtKB/Swiss-Prot;Acc:P20287]			SM_V10_1
0.577	0.182348	0.154	0.263073	0.171	0.017	Muscle 1	Smp_176110	F-box domain-containing protein	Source:UniProtKB/TrEMBL;Acc:A0A3Q0KTY4]	schistosoma_mansoni_prjea36577	F-box domain-containing protein [Source:UniProtKB/TrEMBL;Acc:A0A3Q0KTY4]			SM_V10_4
0.577	0.162085	0.154	0.233839	0.173	0.019	Muscle 1	Smp_135145	Smp_135145	Smp_135145~	schistosoma_mansoni_prjea36577				SM_V10_1
0.575	0.165671	0.15	0.239012	0.369	0.218	Muscle 1	Smp_176080	DIF_8	Source:UniProtKB/TrEMBL;Acc:A0A3Q0KTJ4]	schistosoma_mansoni_prjea36577	DIF_8 [Source:UniProtKB/TrEMBL;Acc:A0A3Q0KTJ4]			SM_V10_Z
0.574	0.186645	0.148	0.269272	0.281	0.137	Muscle 1	Smp_073400	Putative lysosome-associated membrane glycoprotein	Source:UniProtKB/TrEMBL;Acc:A0A3Q0KHN9]	schistosoma_mansoni_prjea36577	Putative lysosome-associated membrane glycoprotein [Source:UniProtKB/TrEMBL;Acc:A0A3Q0KHN9]			SM_V10_Z
0.573	0.15276	0.146	0.220386	0.162	0.016	Muscle 1	Smp_149460	Tyrosine-protein kinase	Source:UniProtKB/TrEMBL;Acc:A0A3Q0KPN7]	schistosoma_mansoni_prjea36577	Tyrosine-protein kinase [Source:UniProtKB/TrEMBL;Acc:A0A3Q0KPN7]	tk4	UniProtKB Gene Name	SM_V10_6
0.573	0.0768253	0.146	0.110836	0.318	0.156	Muscle 1	Smp_321255	PKS_ER domain-containing protein	Source:UniProtKB/TrEMBL;Acc:A0A5K4F8Y7]	schistosoma_mansoni_prjea36577	PKS_ER domain-containing protein [Source:UniProtKB/TrEMBL;Acc:A0A5K4F8Y7]			SM_V10_5
0.573	0.157566	0.146	0.227319	0.166	0.02	Muscle 1	Smp_145460	Synapse differentiation-inducing gene protein 1-like	Source:UniProtKB/TrEMBL;Acc:A0A3Q0KP75]	schistosoma_mansoni_prjea36577	Synapse differentiation-inducing gene protein 1-like [Source:UniProtKB/TrEMBL;Acc:A0A3Q0KP75]			SM_V10_4
0.573	0.186325	0.146	0.26881	0.4	0.268	Muscle 1	Smp_048430	Thioredoxin glutathione reductase	Source:UniProtKB/TrEMBL;Acc:A0A3Q0KFL1]	schistosoma_mansoni_prjea36577	Thioredoxin glutathione reductase [Source:UniProtKB/TrEMBL;Acc:A0A3Q0KFL1]	TGR	UniProtKB Gene Name	SM_V10_1
0.573	0.170832	0.146	0.246458	0.617	0.511	Muscle 1	Smp_337190	Cx9C motif-containing protein 4	Source:UniProtKB/TrEMBL;Acc:A0A5K4FB96]	schistosoma_mansoni_prjea36577	Cx9C motif-containing protein 4 [Source:UniProtKB/TrEMBL;Acc:A0A5K4FB96]			SM_V10_1
0.573	0.167094	0.146	0.241066	0.175	0.028	Muscle 1	Smp_213910	Collagen IV NC1 domain-containing protein	Source:UniProtKB/TrEMBL;Acc:A0A5K4EZW0]	schistosoma_mansoni_prjea36577	Collagen IV NC1 domain-containing protein [Source:UniProtKB/TrEMBL;Acc:A0A5K4EZW0]			SM_V10_1
0.572	0.169157	0.144	0.244042	0.171	0.026	Muscle 1	Smp_345060	Sulfotransfer_1 domain-containing protein	Source:UniProtKB/TrEMBL;Acc:A0A5K4FEK2]	schistosoma_mansoni_prjea36577	Sulfotransfer_1 domain-containing protein [Source:UniProtKB/TrEMBL;Acc:A0A5K4FEK2]			SM_V10_6
0.572	0.230186	0.144	0.332088	0.192	0.048	Muscle 1	Smp_052290	Fibroblast growth factor receptor-like 1	Source:UniProtKB/TrEMBL;Acc:A0A3Q0KFW7]	schistosoma_mansoni_prjea36577	Fibroblast growth factor receptor-like 1 [Source:UniProtKB/TrEMBL;Acc:A0A3Q0KFW7]			SM_V10_4
0.572	0.168083	0.144	0.242492	0.581	0.486	Muscle 1	Smp_061580	COX assembly mitochondrial protein	Source:UniProtKB/TrEMBL;Acc:C4QDY4]	schistosoma_mansoni_prjea36577	COX assembly mitochondrial protein [Source:UniProtKB/TrEMBL;Acc:C4QDY4]			SM_V10_1
0.572	0.157849	0.144	0.227729	0.154	0.01	Muscle 1	Smp_161510	DH domain-containing protein	Source:UniProtKB/TrEMBL;Acc:A0A3Q0KRP4]	schistosoma_mansoni_prjea36577	DH domain-containing protein [Source:UniProtKB/TrEMBL;Acc:A0A3Q0KRP4]			SM_V10_1
0.571	0.139018	0.142	0.20056	0.201	0.057	Muscle 1	Smp_243900	Innexin	Source:UniProtKB/TrEMBL;Acc:A0A5K4F321]	schistosoma_mansoni_prjea36577	Innexin [Source:UniProtKB/TrEMBL;Acc:A0A5K4F321]	inx	UniProtKB Gene Name	SM_V10_Z
0.571	0.17136	0.142	0.24722	0.262	0.123	Muscle 1	Smp_337400	CFA20_dom domain-containing protein	Source:UniProtKB/TrEMBL;Acc:A0A5K4FCA9]	schistosoma_mansoni_prjea36577	CFA20_dom domain-containing protein [Source:UniProtKB/TrEMBL;Acc:A0A5K4FCA9]			SM_V10_Z
0.571	0.154925	0.142	0.22351	0.571	0.465	Muscle 1	Smp_089000	Translocon-associated protein subunit delta	Source:UniProtKB/TrEMBL;Acc:G4VHM6]	schistosoma_mansoni_prjea36577	Translocon-associated protein subunit delta [Source:UniProtKB/TrEMBL;Acc:G4VHM6]			SM_V10_4
0.571	0.115622	0.142	0.166807	0.996	0.995	Muscle 1	Smp_093440	Putative 40s ribosomal protein S5	Source:UniProtKB/TrEMBL;Acc:G4V605]	schistosoma_mansoni_prjea36577	Putative 40s ribosomal protein S5 [Source:UniProtKB/TrEMBL;Acc:G4V605]			SM_V10_1
0.571	0.182803	0.142	0.26373	0.434	0.32	Muscle 1	Smp_161870	Smp_161870	Smp_161870~	schistosoma_mansoni_prjea36577				SM_V10_1
0.571	0.150829	0.142	0.2176	0.162	0.02	Muscle 1	Smp_140940	WW domain-containing protein	Source:UniProtKB/TrEMBL;Acc:A0A5K4EQ63]	schistosoma_mansoni_prjea36577	WW domain-containing protein [Source:UniProtKB/TrEMBL;Acc:A0A5K4EQ63]			SM_V10_1
0.57	0.166524	0.14	0.240243	0.272	0.135	Muscle 1	Smp_315070	SERPIN domain-containing protein	Source:UniProtKB/TrEMBL;Acc:A0A5K4F610]	schistosoma_mansoni_prjea36577	SERPIN domain-containing protein [Source:UniProtKB/TrEMBL;Acc:A0A5K4F610]			SM_V10_6
0.57	0.130577	0.14	0.188382	0.27	0.127	Muscle 1	Smp_001080	RIIa domain-containing protein	Source:UniProtKB/TrEMBL;Acc:G4V5R3]	schistosoma_mansoni_prjea36577	RIIa domain-containing protein [Source:UniProtKB/TrEMBL;Acc:G4V5R3]			SM_V10_3
0.57	0.174044	0.14	0.251092	0.16	0.02	Muscle 1	Smp_332550	Protein Wnt	Source:UniProtKB/TrEMBL;Acc:A0A5K4F7N9]	schistosoma_mansoni_prjea36577	Protein Wnt [Source:UniProtKB/TrEMBL;Acc:A0A5K4F7N9]			SM_V10_1
0.569	0.144999	0.138	0.209189	0.163	0.024	Muscle 1	Smp_034850	Twik family of potassium channels-related	Source:UniProtKB/TrEMBL;Acc:G4V846]	schistosoma_mansoni_prjea36577	Twik family of potassium channels-related [Source:UniProtKB/TrEMBL;Acc:G4V846]			SM_V10_1
0.568	0.160132	0.136	0.231022	0.249	0.117	Muscle 1	Smp_080420	BZIP domain-containing protein	Source:UniProtKB/TrEMBL;Acc:G4VTP8]	schistosoma_mansoni_prjea36577	BZIP domain-containing protein [Source:UniProtKB/TrEMBL;Acc:G4VTP8]			SM_V10_Z
0.568	0.153393	0.136	0.221299	0.155	0.019	Muscle 1	Smp_011560	Tetraspanin	Source:UniProtKB/TrEMBL;Acc:G4VS95]	schistosoma_mansoni_prjea36577	Tetraspanin [Source:UniProtKB/TrEMBL;Acc:G4VS95]			SM_V10_Z
0.568	0.162391	0.136	0.234281	0.313	0.184	Muscle 1	Smp_056440	Superoxide dismutase	Source:UniProtKB/TrEMBL;Acc:G4VSQ5]	schistosoma_mansoni_prjea36577	Superoxide dismutase [Source:UniProtKB/TrEMBL;Acc:G4VSQ5]			SM_V10_Z
0.568	0.142644	0.136	0.205792	0.157	0.022	Muscle 1	Smp_346790	Ig-like domain-containing protein	Source:UniProtKB/TrEMBL;Acc:A0A5K4FBX1]	schistosoma_mansoni_prjea36577	Ig-like domain-containing protein [Source:UniProtKB/TrEMBL;Acc:A0A5K4FBX1]			SM_V10_3
0.568	0.150409	0.136	0.216995	0.277	0.143	Muscle 1	Smp_083040	Adducin related protein	Source:UniProtKB/TrEMBL;Acc:G4V775]	schistosoma_mansoni_prjea36577	Adducin related protein [Source:UniProtKB/TrEMBL;Acc:G4V775]			SM_V10_1
0.567	0.178381	0.134	0.257349	0.474	0.372	Muscle 1	Smp_158640	Pol-related	Source:UniProtKB/TrEMBL;Acc:G4LZ88]	schistosoma_mansoni_prjea36577	Pol-related [Source:UniProtKB/TrEMBL;Acc:G4LZ88]			SM_V10_6
0.567	0.148797	0.134	0.214669	0.171	0.038	Muscle 1	Smp_315730	TGc domain-containing protein	Source:UniProtKB/TrEMBL;Acc:G4VI28]	schistosoma_mansoni_prjea36577	TGc domain-containing protein [Source:UniProtKB/TrEMBL;Acc:G4VI28]			SM_V10_4
0.567	0.146248	0.134	0.210991	0.146	0.011	Muscle 1	Smp_167650	DH domain-containing protein	Source:UniProtKB/TrEMBL;Acc:A0A3Q0KSN2]	schistosoma_mansoni_prjea36577	DH domain-containing protein [Source:UniProtKB/TrEMBL;Acc:A0A3Q0KSN2]			SM_V10_3
0.566	0.142639	0.132	0.205784	0.216	0.084	Muscle 1	Smp_063070	Putative rabb and C	Source:UniProtKB/TrEMBL;Acc:A0A3Q0KGU5]	schistosoma_mansoni_prjea36577	Putative rabb and C [Source:UniProtKB/TrEMBL;Acc:A0A3Q0KGU5]			SM_V10_6
0.566	0.139387	0.132	0.201093	0.151	0.019	Muscle 1	Smp_069240	Potassium channel protein	Source:UniProtKB/TrEMBL;Acc:Q26597]	schistosoma_mansoni_prjea36577	Potassium channel protein [Source:UniProtKB/TrEMBL;Acc:Q26597]	SKv1.1	UniProtKB Gene Name	SM_V10_4
0.566	0.158385	0.132	0.228501	0.359	0.235	Muscle 1	Smp_139500	Transcriptional regulator	Source:UniProtKB/TrEMBL;Acc:G4LYL4]	schistosoma_mansoni_prjea36577	Transcriptional regulator [Source:UniProtKB/TrEMBL;Acc:G4LYL4]			SM_V10_1
0.565	0.143808	0.13	0.20747	0.137	0.007	Muscle 1	Smp_134960	G_PROTEIN_RECEP_F1_2 domain-containing protein	Source:UniProtKB/TrEMBL;Acc:A0A3Q0KMD0]	schistosoma_mansoni_prjea36577	G_PROTEIN_RECEP_F1_2 domain-containing protein [Source:UniProtKB/TrEMBL;Acc:A0A3Q0KMD0]			SM_V10_3
0.565	0.142626	0.13	0.205766	0.64	0.545	Muscle 1	Smp_174850	Ragulator complex protein LAMTOR1	Source:UniProtKB/TrEMBL;Acc:A0A3Q0KT91]	schistosoma_mansoni_prjea36577	Ragulator complex protein LAMTOR1 [Source:UniProtKB/TrEMBL;Acc:A0A3Q0KT91]			SM_V10_3
0.565	0.197749	0.13	0.285292	0.133	0.003	Muscle 1	Smp_156540	Protein Wnt	Source:UniProtKB/TrEMBL;Acc:A0A3Q0KQY3]	schistosoma_mansoni_prjea36577	Protein Wnt [Source:UniProtKB/TrEMBL;Acc:A0A3Q0KQY3]			SM_V10_2
0.564	0.152438	0.128	0.219921	0.257	0.131	Muscle 1	Smp_266790	NUDE_C domain-containing protein	Source:UniProtKB/TrEMBL;Acc:A0A5K4F338]	schistosoma_mansoni_prjea36577	NUDE_C domain-containing protein [Source:UniProtKB/TrEMBL;Acc:A0A5K4F338]			SM_V10_Z
0.564	0.155516	0.128	0.224363	0.563	0.486	Muscle 1	Smp_074700	Translocon-associated protein subunit gamma	Source:UniProtKB/TrEMBL;Acc:A0A3Q0KHU4]	schistosoma_mansoni_prjea36577	Translocon-associated protein subunit gamma [Source:UniProtKB/TrEMBL;Acc:A0A3Q0KHU4]			SM_V10_Z
0.564	0.153687	0.128	0.221724	0.612	0.554	Muscle 1	Smp_024590	Putative signal recognition particle 19 kD protein	Source:UniProtKB/TrEMBL;Acc:G4VIQ2]	schistosoma_mansoni_prjea36577	Putative signal recognition particle 19 kD protein [Source:UniProtKB/TrEMBL;Acc:G4VIQ2]			SM_V10_4
0.564	0.19296	0.128	0.278383	0.166	0.039	Muscle 1	Smp_111980	Smp_111980	Smp_111980~	schistosoma_mansoni_prjea36577				SM_V10_4
0.564	0.0942492	0.128	0.135973	0.282	0.144	Muscle 1	Smp_079010	Camp-dependent protein kinase type II-alpha regulatory subunit, putative	Source:UniProtKB/TrEMBL;Acc:G4LV34]	schistosoma_mansoni_prjea36577	Camp-dependent protein kinase type II-alpha regulatory subunit, putative [Source:UniProtKB/TrEMBL;Acc:G4LV34]			SM_V10_4
0.564	0.143415	0.128	0.206904	0.28	0.155	Muscle 1	Smp_083150	G patch domain-containing protein 11	Source:UniProtKB/TrEMBL;Acc:G4V7E6]	schistosoma_mansoni_prjea36577	G patch domain-containing protein 11 [Source:UniProtKB/TrEMBL;Acc:G4V7E6]			SM_V10_1
0.563	0.135607	0.126	0.195639	0.146	0.021	Muscle 1	Smp_157830	Putative erythrocyte membrane protein	Source:UniProtKB/TrEMBL;Acc:A0A3Q0KQR5]	schistosoma_mansoni_prjea36577	Putative erythrocyte membrane protein [Source:UniProtKB/TrEMBL;Acc:A0A3Q0KQR5]			SM_V10_Z
0.563	0.139259	0.126	0.200908	0.135	0.01	Muscle 1	Smp_042340	Catenin and plakophilin, putative	Source:UniProtKB/TrEMBL;Acc:A0A3Q0KEZ1]	schistosoma_mansoni_prjea36577	Catenin and plakophilin, putative [Source:UniProtKB/TrEMBL;Acc:A0A3Q0KEZ1]			SM_V10_4
0.562	0.127094	0.124	0.183357	0.162	0.038	Muscle 1	Smp_170150	Protein kinase domain-containing protein	Source:UniProtKB/TrEMBL;Acc:A0A3Q0KSK6]	schistosoma_mansoni_prjea36577	Protein kinase domain-containing protein [Source:UniProtKB/TrEMBL;Acc:A0A3Q0KSK6]			SM_V10_Z
0.562	0.145867	0.124	0.210442	0.384	0.269	Muscle 1	Smp_073140	Ubiquitin-like domain-containing protein	Source:UniProtKB/TrEMBL;Acc:G4VA75]	schistosoma_mansoni_prjea36577	Ubiquitin-like domain-containing protein [Source:UniProtKB/TrEMBL;Acc:G4VA75]			SM_V10_1
0.561	0.139504	0.122	0.201262	0.322	0.205	Muscle 1	Smp_071250	Putative rap1 and	Source:UniProtKB/TrEMBL;Acc:G4VFV4]	schistosoma_mansoni_prjea36577	Putative rap1 and [Source:UniProtKB/TrEMBL;Acc:G4VFV4]			SM_V10_1
0.56	0.128112	0.12	0.184827	0.312	0.193	Muscle 1	Smp_198980	Ccr4-not transcription complex, putative	Source:UniProtKB/TrEMBL;Acc:A0A3Q0KUK7]	schistosoma_mansoni_prjea36577	Ccr4-not transcription complex, putative [Source:UniProtKB/TrEMBL;Acc:A0A3Q0KUK7]			SM_V10_Z
0.56	0.12832	0.12	0.185126	0.135	0.014	Muscle 1	Smp_068280	procollagen-proline 4-dioxygenase	Source:UniProtKB/TrEMBL;Acc:G4VTC9]	schistosoma_mansoni_prjea36577	procollagen-proline 4-dioxygenase [Source:UniProtKB/TrEMBL;Acc:G4VTC9]			SM_V10_Z
0.56	0.157865	0.12	0.227752	0.614	0.563	Muscle 1	Smp_346380	FAA_hydrolase domain-containing protein	Source:UniProtKB/TrEMBL;Acc:A0A5K4FGH3]	schistosoma_mansoni_prjea36577	FAA_hydrolase domain-containing protein [Source:UniProtKB/TrEMBL;Acc:A0A5K4FGH3]			SM_V10_7
0.56	0.116771	0.12	0.168465	0.38	0.26	Muscle 1	Smp_090120	Tubulin alpha chain	Source:UniProtKB/TrEMBL;Acc:Q26595]	schistosoma_mansoni_prjea36577	Tubulin alpha chain [Source:UniProtKB/TrEMBL;Acc:Q26595]	sat1	UniProtKB Gene Name	SM_V10_4
0.56	0.136831	0.12	0.197405	0.186	0.067	Muscle 1	Smp_247520	Leucine-rich repeat flightless-interacting protein 2	Source:UniProtKB/TrEMBL;Acc:A0A5K4F4D7]	schistosoma_mansoni_prjea36577	Leucine-rich repeat flightless-interacting protein 2 [Source:UniProtKB/TrEMBL;Acc:A0A5K4F4D7]			SM_V10_4
0.56	0.1291	0.12	0.186252	0.194	0.072	Muscle 1	Smp_344270	Liprin-alpha-2	Source:UniProtKB/TrEMBL;Acc:A0A5K4FFH3]	schistosoma_mansoni_prjea36577	Liprin-alpha-2 [Source:UniProtKB/TrEMBL;Acc:A0A5K4FFH3]			SM_V10_4
0.56	0.134505	0.12	0.19405	0.147	0.027	Muscle 1	Smp_333600	ATP receptor	Source:UniProtKB/TrEMBL;Acc:Q65A65]	schistosoma_mansoni_prjea36577	ATP receptor [Source:UniProtKB/TrEMBL;Acc:Q65A65]	schP2X	UniProtKB Gene Name	SM_V10_3
0.56	0.13322	0.12	0.192196	0.129	0.009	Muscle 1	Smp_173010	Putative dro/myosuppressin receptor	Source:UniProtKB/TrEMBL;Acc:A0A3Q0KT44]	schistosoma_mansoni_prjea36577	Putative dro/myosuppressin receptor [Source:UniProtKB/TrEMBL;Acc:A0A3Q0KT44]			SM_V10_2
0.56	0.140264	0.12	0.202358	0.522	0.413	Muscle 1	Smp_073570	RPB6 homolog	Source:UniProtKB/TrEMBL;Acc:G4V787]	schistosoma_mansoni_prjea36577	RPB6 homolog [Source:UniProtKB/TrEMBL;Acc:G4V787]			SM_V10_1
0.559	0.128852	0.118	0.185894	0.135	0.018	Muscle 1	Smp_244080	protein-tyrosine-phosphatase	Source:UniProtKB/TrEMBL;Acc:A0A5K4F0C8]	schistosoma_mansoni_prjea36577	protein-tyrosine-phosphatase [Source:UniProtKB/TrEMBL;Acc:A0A5K4F0C8]			SM_V10_Z
0.559	0.124547	0.118	0.179683	0.143	0.025	Muscle 1	Smp_146750	Sodium/hydrogen exchanger	Source:UniProtKB/TrEMBL;Acc:A0A3Q0KP77]	schistosoma_mansoni_prjea36577	Sodium/hydrogen exchanger [Source:UniProtKB/TrEMBL;Acc:A0A3Q0KP77]			SM_V10_5
0.559	0.113238	0.118	0.163367	0.881	0.877	Muscle 1	Smp_315750	Ubiquitin conjugating enzyme E2, putative	Source:UniProtKB/TrEMBL;Acc:A0A5K4F658]	schistosoma_mansoni_prjea36577	Ubiquitin conjugating enzyme E2, putative [Source:UniProtKB/TrEMBL;Acc:A0A5K4F658]			SM_V10_5
0.559	0.119767	0.118	0.172787	0.161	0.043	Muscle 1	Smp_170760	Putative bromodomain containing protein	Source:UniProtKB/TrEMBL;Acc:A0A3Q0KSP2]	schistosoma_mansoni_prjea36577	Putative bromodomain containing protein [Source:UniProtKB/TrEMBL;Acc:A0A3Q0KSP2]			SM_V10_4
0.559	0.108116	0.118	0.155978	0.939	0.915	Muscle 1	Smp_031570	60S ribosomal protein L18, putative	Source:UniProtKB/TrEMBL;Acc:G4LUU2]	schistosoma_mansoni_prjea36577	60S ribosomal protein L18, putative [Source:UniProtKB/TrEMBL;Acc:G4LUU2]			SM_V10_1
0.558	0.155224	0.116	0.223941	0.479	0.397	Muscle 1	Smp_079710	NADH dehydrogenase	ubiquinone] 1 alpha subcomplex subunit 2	schistosoma_mansoni_prjea36577	NADH dehydrogenase [ubiquinone] 1 alpha subcomplex subunit 2 [Source:UniProtKB/TrEMBL;Acc:G4VFB4]			SM_V10_3
0.558	0.110141	0.116	0.158899	0.159	0.042	Muscle 1	Smp_012440	Glucose transport protein	Source:UniProtKB/TrEMBL;Acc:Q26579]	schistosoma_mansoni_prjea36577	Glucose transport protein [Source:UniProtKB/TrEMBL;Acc:Q26579]	GTP1	UniProtKB Gene Name	SM_V10_2
0.558	0.110914	0.116	0.160015	0.173	0.056	Muscle 1	Smp_102690	Eukaryotic translation initiation factor 2c,putative	Source:UniProtKB/TrEMBL;Acc:A0A5K4EIZ2]	schistosoma_mansoni_prjea36577	Eukaryotic translation initiation factor 2c,putative [Source:UniProtKB/TrEMBL;Acc:A0A5K4EIZ2]			SM_V10_1
0.558	0.133838	0.116	0.193087	0.353	0.244	Muscle 1	Smp_130950	Putative DNA double-strand break repair rad50 ATPase	Source:UniProtKB/TrEMBL;Acc:A0A3Q0KLU0]	schistosoma_mansoni_prjea36577	Putative DNA double-strand break repair rad50 ATPase [Source:UniProtKB/TrEMBL;Acc:A0A3Q0KLU0]			SM_V10_1
0.557	0.132251	0.114	0.190798	0.186	0.073	Muscle 1	Smp_000100	Filamin	Source:UniProtKB/TrEMBL;Acc:A0A3Q0KB95]	schistosoma_mansoni_prjea36577	Filamin [Source:UniProtKB/TrEMBL;Acc:A0A3Q0KB95]			SM_V10_3
0.557	0.14085	0.114	0.203203	0.325	0.219	Muscle 1	Smp_002740	DIF_7	Source:UniProtKB/TrEMBL;Acc:B8Y6H5]	schistosoma_mansoni_prjea36577	DIF_7 [Source:UniProtKB/TrEMBL;Acc:B8Y6H5]			SM_V10_3
0.557	0.120666	0.114	0.174084	0.489	0.378	Muscle 1	Smp_327420	Cap-specific mRNA (nucleoside-2'-O-)-methyltransferase 1	Source:UniProtKB/TrEMBL;Acc:A0A5K4F8G5]	schistosoma_mansoni_prjea36577	Cap-specific mRNA (nucleoside-2'-O-)-methyltransferase 1 [Source:UniProtKB/TrEMBL;Acc:A0A5K4F8G5]			SM_V10_2
0.557	0.400585	0.114	0.577922	0.182	0.069	Muscle 1	Smp_246820	N-acetyltransferase domain-containing protein	Source:UniProtKB/TrEMBL;Acc:A0A5K4F2M1]	schistosoma_mansoni_prjea36577	N-acetyltransferase domain-containing protein [Source:UniProtKB/TrEMBL;Acc:A0A5K4F2M1]			SM_V10_1
0.557	0.135292	0.114	0.195184	0.784	0.761	Muscle 1	Smp_129080	ATP synthase subunit	Source:UniProtKB/TrEMBL;Acc:G4V9I3]	schistosoma_mansoni_prjea36577	ATP synthase subunit [Source:UniProtKB/TrEMBL;Acc:G4V9I3]			SM_V10_1
0.557	0.0839182	0.114	0.121068	0.918	0.862	Muscle 1	Smp_089570	Putative stress associated endoplasmic reticulum protein (Serp1/ramp4)	Source:UniProtKB/TrEMBL;Acc:G4V5T6]	schistosoma_mansoni_prjea36577	Putative stress associated endoplasmic reticulum protein (Serp1/ramp4) [Source:UniProtKB/TrEMBL;Acc:G4V5T6]			SM_V10_1
0.556	0.0629624	0.112	0.0908355	0.943	0.895	Muscle 1	Smp_172190	N6-adenosine-methyltransferase non-catalytic subunit	Source:UniProtKB/TrEMBL;Acc:A0A5K4EWY0]	schistosoma_mansoni_prjea36577	N6-adenosine-methyltransferase non-catalytic subunit [Source:UniProtKB/TrEMBL;Acc:A0A5K4EWY0]			SM_V10_6
0.556	0.1161	0.112	0.167497	0.135	0.022	Muscle 1	Smp_341900	EF-hand domain-containing protein	Source:UniProtKB/TrEMBL;Acc:A0A5K4FCA5]	schistosoma_mansoni_prjea36577	EF-hand domain-containing protein [Source:UniProtKB/TrEMBL;Acc:A0A5K4FCA5]			SM_V10_6
0.555	0.130849	0.11	0.188775	0.149	0.04	Muscle 1	Smp_243150	EGF-like domain-containing protein	Source:UniProtKB/TrEMBL;Acc:A0A5K4F1F8]	schistosoma_mansoni_prjea36577	EGF-like domain-containing protein [Source:UniProtKB/TrEMBL;Acc:A0A5K4F1F8]			SM_V10_Z
0.555	0.0790975	0.11	0.114114	0.998	0.996	Muscle 1	Smp_001830	Putative 60s ribosomal protein L24	Source:UniProtKB/TrEMBL;Acc:G4VLF6]	schistosoma_mansoni_prjea36577	Putative 60s ribosomal protein L24 [Source:UniProtKB/TrEMBL;Acc:G4VLF6]			SM_V10_6
0.555	0.114954	0.11	0.165843	0.144	0.033	Muscle 1	Smp_074190	C2 NT-type domain-containing protein	Source:UniProtKB/TrEMBL;Acc:G4VLA4]	schistosoma_mansoni_prjea36577	C2 NT-type domain-containing protein [Source:UniProtKB/TrEMBL;Acc:G4VLA4]			SM_V10_6
0.555	0.124278	0.11	0.179295	0.447	0.351	Muscle 1	Smp_326750	NADH dehydrogenase	ubiquinone] 1 alpha subcomplex subunit 6	schistosoma_mansoni_prjea36577	NADH dehydrogenase [ubiquinone] 1 alpha subcomplex subunit 6 [Source:UniProtKB/TrEMBL;Acc:A0A146MHS2]			SM_V10_3
0.555	0.101641	0.11	0.146637	0.868	0.856	Muscle 1	Smp_040790	Peptidyl-prolyl cis-trans isomerase	Source:UniProtKB/TrEMBL;Acc:G4VFQ0]	schistosoma_mansoni_prjea36577	Peptidyl-prolyl cis-trans isomerase [Source:UniProtKB/TrEMBL;Acc:G4VFQ0]			SM_V10_3
0.555	0.108539	0.11	0.156589	0.797	0.75	Muscle 1	Smp_087550	Cytochrome c oxidase subunit 6A1, mitochondrial	Source:UniProtKB/TrEMBL;Acc:G4VFB1]	schistosoma_mansoni_prjea36577	Cytochrome c oxidase subunit 6A1, mitochondrial [Source:UniProtKB/TrEMBL;Acc:G4VFB1]			SM_V10_3
0.555	0.141297	0.11	0.203849	0.407	0.309	Muscle 1	Smp_150460	Copper transport protein atox1-related	Source:UniProtKB/TrEMBL;Acc:G4VGF2]	schistosoma_mansoni_prjea36577	Copper transport protein atox1-related [Source:UniProtKB/TrEMBL;Acc:G4VGF2]			SM_V10_3
0.555	0.095041	0.11	0.137115	0.199	0.085	Muscle 1	Smp_089460	Family C2 unassigned peptidase (C02 family)	Source:UniProtKB/TrEMBL;Acc:A0A3Q0KJ03]	schistosoma_mansoni_prjea36577	Family C2 unassigned peptidase (C02 family) [Source:UniProtKB/TrEMBL;Acc:A0A3Q0KJ03]			SM_V10_2
0.554	0.13385	0.108	0.193105	0.404	0.315	Muscle 1	Smp_040800	Glycine--tRNA ligase	Source:UniProtKB/TrEMBL;Acc:A0A3Q0KEV1]	schistosoma_mansoni_prjea36577	Glycine--tRNA ligase [Source:UniProtKB/TrEMBL;Acc:A0A3Q0KEV1]			SM_V10_3
0.554	0.105509	0.108	0.152218	0.249	0.139	Muscle 1	Smp_005230	EF hand containing protein	Source:UniProtKB/TrEMBL;Acc:G4V611]	schistosoma_mansoni_prjea36577	EF hand containing protein [Source:UniProtKB/TrEMBL;Acc:G4V611]			SM_V10_1
0.553	0.107257	0.106	0.154739	0.499	0.403	Muscle 1	Smp_052910	Skp1-related	Source:UniProtKB/TrEMBL;Acc:G4VGF4]	schistosoma_mansoni_prjea36577	Skp1-related [Source:UniProtKB/TrEMBL;Acc:G4VGF4]			SM_V10_3
0.553	0.118152	0.106	0.170457	0.151	0.045	Muscle 1	Smp_152060	C2 domain-containing protein	Source:UniProtKB/TrEMBL;Acc:A0A3Q0KQ73]	schistosoma_mansoni_prjea36577	C2 domain-containing protein [Source:UniProtKB/TrEMBL;Acc:A0A3Q0KQ73]			SM_V10_1
0.553	0.112405	0.106	0.162166	0.114	0.007	Muscle 1	Smp_161790	Smp_161790	Smp_161790~	schistosoma_mansoni_prjea36577				SM_V10_1
0.552	0.0484911	0.104	0.0699579	0.853	0.792	Muscle 1	Smp_322000	Transmembrane protein 258	Source:UniProtKB/TrEMBL;Acc:A0A5K4F596]	schistosoma_mansoni_prjea36577	Transmembrane protein 258 [Source:UniProtKB/TrEMBL;Acc:A0A5K4F596]			SM_V10_Z
0.552	0.134126	0.104	0.193502	0.46	0.377	Muscle 1	Smp_016670	4a-hydroxytetrahydrobiopterin dehydratase	Source:UniProtKB/TrEMBL;Acc:G4VKX2]	schistosoma_mansoni_prjea36577	4a-hydroxytetrahydrobiopterin dehydratase [Source:UniProtKB/TrEMBL;Acc:G4VKX2]			SM_V10_6
0.552	0.117123	0.104	0.168973	0.233	0.129	Muscle 1	Smp_016630	Putative trimeric G-protein alpha o subunit	Source:UniProtKB/TrEMBL;Acc:A0A3Q0KCR4]	schistosoma_mansoni_prjea36577	Putative trimeric G-protein alpha o subunit [Source:UniProtKB/TrEMBL;Acc:A0A3Q0KCR4]			SM_V10_6
0.552	0.137212	0.104	0.197956	0.492	0.413	Muscle 1	Smp_036780	Leydig cell tumor 10 kDa protein homolog	Source:UniProtKB/TrEMBL;Acc:A0A3Q0KEJ7]	schistosoma_mansoni_prjea36577	Leydig cell tumor 10 kDa protein homolog [Source:UniProtKB/TrEMBL;Acc:A0A3Q0KEJ7]			SM_V10_6
0.552	0.133224	0.104	0.192202	0.601	0.56	Muscle 1	Smp_196140	Selenoprotein W, putative	Source:UniProtKB/TrEMBL;Acc:A0A3Q0KUE3]	schistosoma_mansoni_prjea36577	Selenoprotein W, putative [Source:UniProtKB/TrEMBL;Acc:A0A3Q0KUE3]			SM_V10_2
0.551	0.137723	0.102	0.198692	0.408	0.324	Muscle 1	Smp_061040	Putative maf protein	Source:UniProtKB/TrEMBL;Acc:A0A3Q0KGM9]	schistosoma_mansoni_prjea36577	Putative maf protein [Source:UniProtKB/TrEMBL;Acc:A0A3Q0KGM9]			SM_V10_Z
0.551	0.102426	0.102	0.147769	0.165	0.062	Muscle 1	Smp_003270	Tubulin-specific chaperone cofactor E-like protein	Source:UniProtKB/TrEMBL;Acc:A0A3Q0KBM0]	schistosoma_mansoni_prjea36577	Tubulin-specific chaperone cofactor E-like protein [Source:UniProtKB/TrEMBL;Acc:A0A3Q0KBM0]			SM_V10_7
0.551	0.101491	0.102	0.146421	0.12	0.019	Muscle 1	Smp_141520	PDZ domain-containing protein	Source:UniProtKB/TrEMBL;Acc:A0A3Q0KNA9]	schistosoma_mansoni_prjea36577	PDZ domain-containing protein [Source:UniProtKB/TrEMBL;Acc:A0A3Q0KNA9]			SM_V10_6
0.551	0.111446	0.102	0.160782	0.312	0.214	Muscle 1	Smp_067480	Programmed cell death protein, putative	Source:UniProtKB/TrEMBL;Acc:G4LZ74]	schistosoma_mansoni_prjea36577	Programmed cell death protein, putative [Source:UniProtKB/TrEMBL;Acc:G4LZ74]			SM_V10_6
0.551	0.12249	0.102	0.176716	0.294	0.196	Muscle 1	Smp_083740	Putative centrin	Source:UniProtKB/TrEMBL;Acc:G4V6T9]	schistosoma_mansoni_prjea36577	Putative centrin [Source:UniProtKB/TrEMBL;Acc:G4V6T9]			SM_V10_1
0.551	0.117382	0.102	0.169347	0.445	0.359	Muscle 1	Smp_337760	Smp_337760	Smp_337760~	schistosoma_mansoni_prjea36577				SM_V10_1
0.551	0.0867948	0.102	0.125218	0.185	0.08	Muscle 1	Smp_347850	NTR domain-containing protein	Source:UniProtKB/TrEMBL;Acc:A0A5K4FD38]	schistosoma_mansoni_prjea36577	NTR domain-containing protein [Source:UniProtKB/TrEMBL;Acc:A0A5K4FD38]			SM_V10_1
0.55	0.101053	0.1	0.145789	0.119	0.018	Muscle 1	Smp_126480	Calponin	Source:UniProtKB/TrEMBL;Acc:A0A3Q0KL35]	schistosoma_mansoni_prjea36577	Calponin [Source:UniProtKB/TrEMBL;Acc:A0A3Q0KL35]			SM_V10_7
0.55	0.0238116	0.1	0.0343528	0.944	0.882	Muscle 1	Smp_335990	UBB protein	Source:UniProtKB/TrEMBL;Acc:A0A5K4F9I1]	schistosoma_mansoni_prjea36577	UBB protein [Source:UniProtKB/TrEMBL;Acc:A0A5K4F9I1]			SM_V10_2
0.55	0.12679	0.1	0.18292	0.503	0.436	Muscle 1	Smp_021040	Protein FAM32A-like	Source:UniProtKB/TrEMBL;Acc:G4VDL2]	schistosoma_mansoni_prjea36577	Protein FAM32A-like [Source:UniProtKB/TrEMBL;Acc:G4VDL2]			SM_V10_2
0.55	0.118671	0.1	0.171206	0.318	0.225	Muscle 1	Smp_006720	Putative synaptobrevin	Source:UniProtKB/TrEMBL;Acc:G4V9V4]	schistosoma_mansoni_prjea36577	Putative synaptobrevin [Source:UniProtKB/TrEMBL;Acc:G4V9V4]			SM_V10_1
0.55	0.123491	0.1	0.17816	0.36	0.269	Muscle 1	Smp_019990	AP complex subunit sigma	Source:UniProtKB/TrEMBL;Acc:G4V8G4]	schistosoma_mansoni_prjea36577	AP complex subunit sigma [Source:UniProtKB/TrEMBL;Acc:G4V8G4]			SM_V10_1
0.55	0.089561	0.1	0.129209	0.96	0.947	Muscle 1	Smp_003410	Putative 60s ribosomal protein L23a	Source:UniProtKB/TrEMBL;Acc:G4V6P4]	schistosoma_mansoni_prjea36577	Putative 60s ribosomal protein L23a [Source:UniProtKB/TrEMBL;Acc:G4V6P4]			SM_V10_1
0.549	0.103577	0.098	0.14943	0.118	0.02	Muscle 1	Smp_038440	Putative heart-specific myosin light chain phosphatase small subunit	Source:UniProtKB/TrEMBL;Acc:A0A3Q0KEN2]	schistosoma_mansoni_prjea36577	Putative heart-specific myosin light chain phosphatase small subunit [Source:UniProtKB/TrEMBL;Acc:A0A3Q0KEN2]			SM_V10_Z
0.549	0.0972482	0.098	0.1403	0.412	0.32	Muscle 1	Smp_027480	NADH dehydrogenase	ubiquinone] 1 alpha subcomplex subunit 8	schistosoma_mansoni_prjea36577	NADH dehydrogenase [ubiquinone] 1 alpha subcomplex subunit 8 [Source:UniProtKB/TrEMBL;Acc:G4VIB9]			SM_V10_4
0.548	0.106423	0.096	0.153536	0.166	0.069	Muscle 1	Smp_134580	GRAM domain-containing protein	Source:UniProtKB/TrEMBL;Acc:A0A3Q0KMD2]	schistosoma_mansoni_prjea36577	GRAM domain-containing protein [Source:UniProtKB/TrEMBL;Acc:A0A3Q0KMD2]			SM_V10_7
0.548	0.102517	0.096	0.1479	0.105	0.009	Muscle 1	Smp_348060	Cellulase domain-containing protein	Source:UniProtKB/TrEMBL;Acc:A0A5K4FEQ0]	schistosoma_mansoni_prjea36577	Cellulase domain-containing protein [Source:UniProtKB/TrEMBL;Acc:A0A5K4FEQ0]			SM_V10_7
0.548	0.113271	0.096	0.163415	0.104	0.008	Muscle 1	Smp_167140	Protein Wnt	Source:UniProtKB/TrEMBL;Acc:A0A3Q0KSK2]	schistosoma_mansoni_prjea36577	Protein Wnt [Source:UniProtKB/TrEMBL;Acc:A0A3Q0KSK2]			SM_V10_4
0.548	0.096982	0.096	0.139915	0.165	0.068	Muscle 1	Smp_095630	Tetraspanin	Source:UniProtKB/TrEMBL;Acc:Q86D97]	schistosoma_mansoni_prjea36577	Tetraspanin [Source:UniProtKB/TrEMBL;Acc:Q86D97]			SM_V10_4
0.548	0.107366	0.096	0.154896	0.182	0.085	Muscle 1	Smp_149030	FNIP_M domain-containing protein	Source:UniProtKB/TrEMBL;Acc:A0A3Q0KPL0]	schistosoma_mansoni_prjea36577	FNIP_M domain-containing protein [Source:UniProtKB/TrEMBL;Acc:A0A3Q0KPL0]			SM_V10_4
0.548	0.0978575	0.096	0.141179	0.12	0.023	Muscle 1	Smp_000320	Ndr family, putative	Source:UniProtKB/TrEMBL;Acc:A0A3Q0KBB7]	schistosoma_mansoni_prjea36577	Ndr family, putative [Source:UniProtKB/TrEMBL;Acc:A0A3Q0KBB7]			SM_V10_3
0.548	0.110313	0.096	0.159148	0.595	0.542	Muscle 1	Smp_098890	Arginine/serine-rich splicing factor, putative	Source:UniProtKB/TrEMBL;Acc:G4LWC0]	schistosoma_mansoni_prjea36577	Arginine/serine-rich splicing factor, putative [Source:UniProtKB/TrEMBL;Acc:G4LWC0]			SM_V10_3
0.548	0.0988571	0.096	0.142621	0.476	0.396	Muscle 1	Smp_049550	Putative heat shock protein 70 (Hsp70)	Source:UniProtKB/TrEMBL;Acc:G4V910]	schistosoma_mansoni_prjea36577	Putative heat shock protein 70 (Hsp70) [Source:UniProtKB/TrEMBL;Acc:G4V910]			SM_V10_1
0.548	0.128362	0.096	0.185188	0.479	0.414	Muscle 1	Smp_090920	Putative mitochondrial 28S ribosomal protein S14 (S14mt)	Source:UniProtKB/TrEMBL;Acc:G4V8K8]	schistosoma_mansoni_prjea36577	Putative mitochondrial 28S ribosomal protein S14 (S14mt) [Source:UniProtKB/TrEMBL;Acc:G4V8K8]			SM_V10_1
0.547	0.120202	0.094	0.173414	0.376	0.296	Muscle 1	Smp_024390	Signal peptidase complex subunit 2	Source:UniProtKB/TrEMBL;Acc:A0A3Q0KDE8]	schistosoma_mansoni_prjea36577	Signal peptidase complex subunit 2 [Source:UniProtKB/TrEMBL;Acc:A0A3Q0KDE8]			SM_V10_Z
0.547	0.0914232	0.094	0.131896	0.12	0.026	Muscle 1	Smp_078230	cGMP-dependent protein kinase	Source:UniProtKB/TrEMBL;Acc:A0A3Q0KI04]	schistosoma_mansoni_prjea36577	cGMP-dependent protein kinase [Source:UniProtKB/TrEMBL;Acc:A0A3Q0KI04]			SM_V10_6
0.547	0.103652	0.094	0.149538	0.109	0.015	Muscle 1	Smp_074150	Annexin	Source:UniProtKB/TrEMBL;Acc:C4QH88]	schistosoma_mansoni_prjea36577	Annexin [Source:UniProtKB/TrEMBL;Acc:C4QH88]			SM_V10_6
0.547	0.0128655	0.094	0.018561	0.346	0.227	Muscle 1	Smp_042160	Fructose-bisphosphate aldolase	Source:UniProtKB/Swiss-Prot;Acc:P53442]	schistosoma_mansoni_prjea36577	Fructose-bisphosphate aldolase [Source:UniProtKB/Swiss-Prot;Acc:P53442]			SM_V10_4
0.547	0.0879157	0.094	0.126836	0.14	0.045	Muscle 1	Smp_132270	Putative poly(Rc) binding protien	Source:UniProtKB/TrEMBL;Acc:A0A3Q0KLX1]	schistosoma_mansoni_prjea36577	Putative poly(Rc) binding protien [Source:UniProtKB/TrEMBL;Acc:A0A3Q0KLX1]			SM_V10_3
0.547	0.0741258	0.094	0.106941	0.213	0.114	Muscle 1	Smp_003990	Triosephosphate isomerase	Source:UniProtKB/TrEMBL;Acc:G4V6B9]	schistosoma_mansoni_prjea36577	Triosephosphate isomerase [Source:UniProtKB/TrEMBL;Acc:G4V6B9]			SM_V10_1
0.546	0.0978374	0.092	0.141149	0.114	0.022	Muscle 1	Smp_018260	Glycogen	starch] synthase	schistosoma_mansoni_prjea36577	Glycogen [starch] synthase [Source:UniProtKB/TrEMBL;Acc:A0A3Q0KCW2]			SM_V10_3
0.546	0.104774	0.092	0.151157	0.095	0.003	Muscle 1	Smp_246790	LSDAT_euk domain-containing protein	Source:UniProtKB/TrEMBL;Acc:A0A5K4F0X5]	schistosoma_mansoni_prjea36577	LSDAT_euk domain-containing protein [Source:UniProtKB/TrEMBL;Acc:A0A5K4F0X5]			SM_V10_3
0.546	0.0729172	0.092	0.105197	0.999	0.996	Muscle 1	Smp_012750	60S ribosomal protein L12	Source:UniProtKB/TrEMBL;Acc:G4V9G5]	schistosoma_mansoni_prjea36577	60S ribosomal protein L12 [Source:UniProtKB/TrEMBL;Acc:G4V9G5]			SM_V10_1
0.545	0.0648858	0.09	0.0936105	0.871	0.805	Muscle 1	Smp_179460	Cytochrome c oxidase polypeptide VIIc	Source:UniProtKB/TrEMBL;Acc:A0A3Q0KU78]	schistosoma_mansoni_prjea36577	Cytochrome c oxidase polypeptide VIIc [Source:UniProtKB/TrEMBL;Acc:A0A3Q0KU78]			SM_V10_Z
0.545	0.112792	0.09	0.162724	0.514	0.45	Muscle 1	Smp_350390	Smp_350390	Smp_350390~	schistosoma_mansoni_prjea36577				SM_V10_Z
0.545	0.0925584	0.09	0.133534	0.112	0.022	Muscle 1	Smp_150030	ETS domain-containing protein	Source:UniProtKB/TrEMBL;Acc:A0A5K4ET06]	schistosoma_mansoni_prjea36577	ETS domain-containing protein [Source:UniProtKB/TrEMBL;Acc:A0A5K4ET06]			SM_V10_4
0.545	0.057936	0.09	0.083584	0.997	0.996	Muscle 1	Smp_063350	Putative 60s ribosomal protein L27e	Source:UniProtKB/TrEMBL;Acc:G4VF81]	schistosoma_mansoni_prjea36577	Putative 60s ribosomal protein L27e [Source:UniProtKB/TrEMBL;Acc:G4VF81]			SM_V10_3
0.545	0.0878856	0.09	0.126792	0.213	0.122	Muscle 1	Smp_201470	Smp_201470	Source:UniProtKB/TrEMBL;Acc:G4VBU0]	schistosoma_mansoni_prjea36577	Smp_201470 [Source:UniProtKB/TrEMBL;Acc:G4VBU0]			SM_V10_2
0.545	0.0901049	0.09	0.129994	0.134	0.044	Muscle 1	Smp_012350	Venom allergen-like (VAL) 11 protein	Source:UniProtKB/TrEMBL;Acc:G4VC55]	schistosoma_mansoni_prjea36577	Venom allergen-like (VAL) 11 protein [Source:UniProtKB/TrEMBL;Acc:G4VC55]			SM_V10_2
0.545	0.0936222	0.09	0.135068	0.107	0.018	Muscle 1	Smp_302370	Supervillin	Source:UniProtKB/TrEMBL;Acc:A0A5K4F3P0]	schistosoma_mansoni_prjea36577	Supervillin [Source:UniProtKB/TrEMBL;Acc:A0A5K4F3P0]			SM_V10_1
0.544	0.0542954	0.088	0.0783317	0.941	0.904	Muscle 1	Smp_322950	Dynein light chain	Source:UniProtKB/TrEMBL;Acc:A0A5K4F7F9]	schistosoma_mansoni_prjea36577	Dynein light chain [Source:UniProtKB/TrEMBL;Acc:A0A5K4F7F9]			SM_V10_Z
0.544	0.114464	0.088	0.165137	0.292	0.212	Muscle 1	Smp_349010	Smp_349010	Smp_349010~	schistosoma_mansoni_prjea36577				SM_V10_7
0.544	0.0951169	0.088	0.137225	0.119	0.031	Muscle 1	Smp_194100	Putative 2,3-cyclic-nucleotide 2-phosphodiesterase	Source:UniProtKB/TrEMBL;Acc:A0A3Q0KUB8]	schistosoma_mansoni_prjea36577	Putative 2,3-cyclic-nucleotide 2-phosphodiesterase [Source:UniProtKB/TrEMBL;Acc:A0A3Q0KUB8]			SM_V10_6
0.544	0.10123	0.088	0.146045	0.483	0.413	Muscle 1	Smp_056760	Protein disulfide-isomerase	Source:UniProtKB/TrEMBL;Acc:G4LYC3]	schistosoma_mansoni_prjea36577	Protein disulfide-isomerase [Source:UniProtKB/TrEMBL;Acc:G4LYC3]			SM_V10_5
0.544	0.0765818	0.088	0.110484	0.332	0.241	Muscle 1	Smp_145370	Ovule protein	Source:UniProtKB/TrEMBL;Acc:G4VIU5]	schistosoma_mansoni_prjea36577	Ovule protein [Source:UniProtKB/TrEMBL;Acc:G4VIU5]			SM_V10_4
0.544	0.0937402	0.088	0.135238	0.092	0.003	Muscle 1	Smp_345990	G_PROTEIN_RECEP_F1_2 domain-containing protein	Source:UniProtKB/TrEMBL;Acc:A0A5K4FGB5]	schistosoma_mansoni_prjea36577	G_PROTEIN_RECEP_F1_2 domain-containing protein [Source:UniProtKB/TrEMBL;Acc:A0A5K4FGB5]			SM_V10_4
0.544	0.125266	0.088	0.180721	0.406	0.338	Muscle 1	Smp_066620	Mitochondrial ribosomal protein S25, putative	Source:UniProtKB/TrEMBL;Acc:G4LVF9]	schistosoma_mansoni_prjea36577	Mitochondrial ribosomal protein S25, putative [Source:UniProtKB/TrEMBL;Acc:G4LVF9]			SM_V10_2
0.543	0.0895305	0.086	0.129165	0.092	0.007	Muscle 1	Smp_323820	LITAF domain-containing protein	Source:UniProtKB/TrEMBL;Acc:A0A5K4F5N3]	schistosoma_mansoni_prjea36577	LITAF domain-containing protein [Source:UniProtKB/TrEMBL;Acc:A0A5K4F5N3]			SM_V10_Z
0.543	0.0885619	0.086	0.127768	0.138	0.052	Muscle 1	Smp_305875	Multiple PDZ domain protein	Source:UniProtKB/TrEMBL;Acc:A0A5K4F4B7]	schistosoma_mansoni_prjea36577	Multiple PDZ domain protein [Source:UniProtKB/TrEMBL;Acc:A0A5K4F4B7]			SM_V10_Z
0.543	0.076911	0.086	0.110959	0.928	0.917	Muscle 1	Smp_037700	Nuclear transport factor 2	Source:UniProtKB/TrEMBL;Acc:Q15ES0]	schistosoma_mansoni_prjea36577	Nuclear transport factor 2 [Source:UniProtKB/TrEMBL;Acc:Q15ES0]			SM_V10_Z
0.543	0.0917449	0.086	0.13236	0.118	0.032	Muscle 1	Smp_123260	Smp_123260	Smp_123260~	schistosoma_mansoni_prjea36577				SM_V10_6
0.543	0.0875207	0.086	0.126266	0.116	0.029	Muscle 1	Smp_043110	DNA-binding protein	Source:UniProtKB/TrEMBL;Acc:G4VIW8]	schistosoma_mansoni_prjea36577	DNA-binding protein [Source:UniProtKB/TrEMBL;Acc:G4VIW8]			SM_V10_4
0.543	0.0743514	0.086	0.107266	0.142	0.054	Muscle 1	Smp_150140	Putative pi3kinase	Source:UniProtKB/TrEMBL;Acc:A0A3Q0KPR7]	schistosoma_mansoni_prjea36577	Putative pi3kinase [Source:UniProtKB/TrEMBL;Acc:A0A3Q0KPR7]			SM_V10_4
0.543	0.0940126	0.086	0.135631	0.099	0.014	Muscle 1	Smp_008610	Deoxyribonuclease II-related	Source:UniProtKB/TrEMBL;Acc:A0A3Q0KC43]	schistosoma_mansoni_prjea36577	Deoxyribonuclease II-related [Source:UniProtKB/TrEMBL;Acc:A0A3Q0KC43]			SM_V10_4
0.543	0.101352	0.086	0.14622	0.123	0.038	Muscle 1	Smp_123640	G protein-coupled receptor kinase	Source:UniProtKB/TrEMBL;Acc:A0A3Q0KKL4]	schistosoma_mansoni_prjea36577	G protein-coupled receptor kinase [Source:UniProtKB/TrEMBL;Acc:A0A3Q0KKL4]			SM_V10_3
0.543	0.0857388	0.086	0.123695	0.118	0.033	Muscle 1	Smp_347800	PH domain-containing protein	Source:UniProtKB/TrEMBL;Acc:A0A5K4FD33]	schistosoma_mansoni_prjea36577	PH domain-containing protein [Source:UniProtKB/TrEMBL;Acc:A0A5K4FD33]			SM_V10_1
0.542	0.110767	0.084	0.159803	0.309	0.237	Muscle 1	Smp_066200	Cytochrome-c oxidase	Source:UniProtKB/TrEMBL;Acc:G4VST4]	schistosoma_mansoni_prjea36577	Cytochrome-c oxidase [Source:UniProtKB/TrEMBL;Acc:G4VST4]			SM_V10_Z
0.542	0.0921451	0.084	0.132937	0.09	0.006	Muscle 1	Smp_204230	G_PROTEIN_RECEP_F1_2 domain-containing protein	Source:UniProtKB/TrEMBL;Acc:A0A3Q0KV19]	schistosoma_mansoni_prjea36577	G_PROTEIN_RECEP_F1_2 domain-containing protein [Source:UniProtKB/TrEMBL;Acc:A0A3Q0KV19]			SM_V10_Z
0.542	0.0646003	0.084	0.0931985	0.866	0.826	Muscle 1	Smp_024120	Cytochrome b-c1 complex subunit 7	Source:UniProtKB/Swiss-Prot;Acc:O01374]	schistosoma_mansoni_prjea36577	Cytochrome b-c1 complex subunit 7 [Source:UniProtKB/Swiss-Prot;Acc:O01374]			SM_V10_Z
0.542	0.0777205	0.084	0.112127	0.147	0.062	Muscle 1	Smp_082360	SH3 domain-containing protein	Source:UniProtKB/TrEMBL;Acc:A0A3Q0KIF0]	schistosoma_mansoni_prjea36577	SH3 domain-containing protein [Source:UniProtKB/TrEMBL;Acc:A0A3Q0KIF0]			SM_V10_7
0.542	0.0891615	0.084	0.128633	0.241	0.159	Muscle 1	Smp_150890	RBR-type E3 ubiquitin transferase	Source:UniProtKB/TrEMBL;Acc:G4VIZ3]	schistosoma_mansoni_prjea36577	RBR-type E3 ubiquitin transferase [Source:UniProtKB/TrEMBL;Acc:G4VIZ3]			SM_V10_4
0.542	0.0961069	0.084	0.138653	0.162	0.078	Muscle 1	Smp_028990	Serine/threonine-protein phosphatase	Source:UniProtKB/TrEMBL;Acc:G4VGS4]	schistosoma_mansoni_prjea36577	Serine/threonine-protein phosphatase [Source:UniProtKB/TrEMBL;Acc:G4VGS4]			SM_V10_3
0.542	0.0458699	0.084	0.0661762	0.204	0.114	Muscle 1	Smp_328110	Epithelial membrane protein 1	Source:UniProtKB/TrEMBL;Acc:A0A5K4FAM4]	schistosoma_mansoni_prjea36577	Epithelial membrane protein 1 [Source:UniProtKB/TrEMBL;Acc:A0A5K4FAM4]			SM_V10_2
0.542	0.0908221	0.084	0.131029	0.26	0.177	Muscle 1	Smp_147790	Putative homothorax homeobox protein	Source:UniProtKB/TrEMBL;Acc:A0A3Q0KPE7]	schistosoma_mansoni_prjea36577	Putative homothorax homeobox protein [Source:UniProtKB/TrEMBL;Acc:A0A3Q0KPE7]			SM_V10_2
0.542	0.0892211	0.084	0.128719	0.092	0.007	Muscle 1	Smp_158460	SH3 domain-containing protein	Source:UniProtKB/TrEMBL;Acc:A0A5K4ETL7]	schistosoma_mansoni_prjea36577	SH3 domain-containing protein [Source:UniProtKB/TrEMBL;Acc:A0A5K4ETL7]			SM_V10_1
0.542	0.0815877	0.084	0.117706	0.257	0.172	Muscle 1	Smp_012790	Smp_012790	Smp_012790~	schistosoma_mansoni_prjea36577				SM_V10_1
0.541	0.12184	0.082	0.175778	0.489	0.446	Muscle 1	Smp_046030	U6 snRNA-associated Sm-like protein LSm1	Source:UniProtKB/TrEMBL;Acc:A0A3Q0KFD4]	schistosoma_mansoni_prjea36577	U6 snRNA-associated Sm-like protein LSm1 [Source:UniProtKB/TrEMBL;Acc:A0A3Q0KFD4]	LSM1	UniProtKB Gene Name	SM_V10_Z
0.541	0.0888884	0.082	0.128239	0.096	0.013	Muscle 1	Smp_028690	Transporter	Source:UniProtKB/TrEMBL;Acc:A0A5K4EBM3]	schistosoma_mansoni_prjea36577	Transporter [Source:UniProtKB/TrEMBL;Acc:A0A5K4EBM3]	NAT	UniProtKB Gene Name	SM_V10_Z
0.541	0.0923407	0.082	0.133219	0.488	0.42	Muscle 1	Smp_031720	Histone H2A	Source:UniProtKB/TrEMBL;Acc:G4VN61]	schistosoma_mansoni_prjea36577	Histone H2A [Source:UniProtKB/TrEMBL;Acc:G4VN61]			SM_V10_7
0.541	0.0861394	0.082	0.124273	0.096	0.013	Muscle 1	Smp_177020	Phosphoinositide phospholipase C	Source:UniProtKB/TrEMBL;Acc:A0A5K4EXX0]	schistosoma_mansoni_prjea36577	Phosphoinositide phospholipase C [Source:UniProtKB/TrEMBL;Acc:A0A5K4EXX0]			SM_V10_3
0.541	0.0888492	0.082	0.128182	0.083	0.001	Muscle 1	Smp_138350	C2H2-type domain-containing protein	Source:UniProtKB/TrEMBL;Acc:A0A3Q0KN29]	schistosoma_mansoni_prjea36577	C2H2-type domain-containing protein [Source:UniProtKB/TrEMBL;Acc:A0A3Q0KN29]			SM_V10_3
0.541	0.105715	0.082	0.152515	0.237	0.159	Muscle 1	Smp_247410	EGF-like domain-containing protein	Source:UniProtKB/TrEMBL;Acc:A0A5K4F1D8]	schistosoma_mansoni_prjea36577	EGF-like domain-containing protein [Source:UniProtKB/TrEMBL;Acc:A0A5K4F1D8]			SM_V10_2
0.541	0.0954281	0.082	0.137674	0.226	0.145	Muscle 1	Smp_159730	Protein kinase	Source:UniProtKB/TrEMBL;Acc:A0A3Q0KR59]	schistosoma_mansoni_prjea36577	Protein kinase [Source:UniProtKB/TrEMBL;Acc:A0A3Q0KR59]			SM_V10_1
0.54	0.0766245	0.08	0.110546	0.154	0.072	Muscle 1	Smp_074590	Protein sleepless	Source:UniProtKB/TrEMBL;Acc:G4LZC5]	schistosoma_mansoni_prjea36577	Protein sleepless [Source:UniProtKB/TrEMBL;Acc:G4LZC5]			SM_V10_Z
0.54	0.0731947	0.08	0.105598	0.149	0.068	Muscle 1	Smp_139100	DUF4139 domain-containing protein	Source:UniProtKB/TrEMBL;Acc:A0A5K4ENJ7]	schistosoma_mansoni_prjea36577	DUF4139 domain-containing protein [Source:UniProtKB/TrEMBL;Acc:A0A5K4ENJ7]			SM_V10_Z
0.54	0.0880773	0.08	0.127069	0.089	0.008	Muscle 1	Smp_022340	Putative pdz and lim domain protein	Source:UniProtKB/TrEMBL;Acc:G4VPH8]	schistosoma_mansoni_prjea36577	Putative pdz and lim domain protein [Source:UniProtKB/TrEMBL;Acc:G4VPH8]			SM_V10_Z
0.54	0.0753684	0.08	0.108734	0.122	0.041	Muscle 1	Smp_173340	Putative transcription factor	Source:UniProtKB/TrEMBL;Acc:A0A3Q0KT53]	schistosoma_mansoni_prjea36577	Putative transcription factor [Source:UniProtKB/TrEMBL;Acc:A0A3Q0KT53]			SM_V10_6
0.54	0.0751033	0.08	0.108351	0.131	0.05	Muscle 1	Smp_346030	Lysosome-associated membrane glycoprotein 2	Source:UniProtKB/TrEMBL;Acc:A0A5K4FCE2]	schistosoma_mansoni_prjea36577	Lysosome-associated membrane glycoprotein 2 [Source:UniProtKB/TrEMBL;Acc:A0A5K4FCE2]			SM_V10_2
0.54	0.0389561	0.08	0.0562018	0.997	0.993	Muscle 1	Smp_340900	40S ribosomal protein S8	Source:UniProtKB/TrEMBL;Acc:A0A5K4FBY9]	schistosoma_mansoni_prjea36577	40S ribosomal protein S8 [Source:UniProtKB/TrEMBL;Acc:A0A5K4FBY9]			SM_V10_1
0.54	0.0608138	0.08	0.0877358	0.855	0.824	Muscle 1	Smp_140480	ATP synthase f chain, mitochondrial-related	Source:UniProtKB/TrEMBL;Acc:G4LVE7]	schistosoma_mansoni_prjea36577	ATP synthase f chain, mitochondrial-related [Source:UniProtKB/TrEMBL;Acc:G4LVE7]			SM_V10_1
0.54	0.0879492	0.08	0.126884	0.095	0.016	Muscle 1	Smp_174170	Putative homeobox protein meis	Source:UniProtKB/TrEMBL;Acc:A0A3Q0KT55]	schistosoma_mansoni_prjea36577	Putative homeobox protein meis [Source:UniProtKB/TrEMBL;Acc:A0A3Q0KT55]			SM_V10_1
0.539	0.110253	0.078	0.159061	0.387	0.328	Muscle 1	Smp_038980	Fcf2 domain-containing protein	Source:UniProtKB/TrEMBL;Acc:G4VQZ3]	schistosoma_mansoni_prjea36577	Fcf2 domain-containing protein [Source:UniProtKB/TrEMBL;Acc:G4VQZ3]			SM_V10_Z
0.539	0.0876653	0.078	0.126474	0.087	0.008	Muscle 1	Smp_139980	Putative ataxin 2-binding protein (Hexaribonucleotide binding protein 1)	Source:UniProtKB/TrEMBL;Acc:A0A5K4EP73]	schistosoma_mansoni_prjea36577	Putative ataxin 2-binding protein (Hexaribonucleotide binding protein 1) [Source:UniProtKB/TrEMBL;Acc:A0A5K4EP73]			SM_V10_Z
0.539	0.0913108	0.078	0.131734	0.151	0.074	Muscle 1	Smp_343610	ANK_REP_REGION domain-containing protein	Source:UniProtKB/TrEMBL;Acc:A0A5K4FF85]	schistosoma_mansoni_prjea36577	ANK_REP_REGION domain-containing protein [Source:UniProtKB/TrEMBL;Acc:A0A5K4FF85]			SM_V10_5
0.539	0.0781846	0.078	0.112796	0.096	0.019	Muscle 1	Smp_347840	EF-hand domain-containing protein	Source:UniProtKB/TrEMBL;Acc:A0A5K4FH65]	schistosoma_mansoni_prjea36577	EF-hand domain-containing protein [Source:UniProtKB/TrEMBL;Acc:A0A5K4FH65]			SM_V10_3
0.539	0.080491	0.078	0.116124	0.111	0.033	Muscle 1	Smp_245800	Calponin-homology (CH) domain-containing protein	Source:UniProtKB/TrEMBL;Acc:A0A5K4F1X1]	schistosoma_mansoni_prjea36577	Calponin-homology (CH) domain-containing protein [Source:UniProtKB/TrEMBL;Acc:A0A5K4F1X1]			SM_V10_2
0.539	0.126096	0.078	0.181918	0.51	0.465	Muscle 1	Smp_072110	Programmed cell death protein 4	Source:UniProtKB/TrEMBL;Acc:G4M0A0]	schistosoma_mansoni_prjea36577	Programmed cell death protein 4 [Source:UniProtKB/TrEMBL;Acc:G4M0A0]			SM_V10_2
0.539	0.079554	0.078	0.114772	0.591	0.51	Muscle 1	Smp_008440	DNA-directed RNA polymerases I, II, and III subunit RPABC5	Source:UniProtKB/TrEMBL;Acc:G4V5H2]	schistosoma_mansoni_prjea36577	DNA-directed RNA polymerases I, II, and III subunit RPABC5 [Source:UniProtKB/TrEMBL;Acc:G4V5H2]			SM_V10_1
0.538	0.0638317	0.076	0.0920896	0.989	0.99	Muscle 1	Smp_322220	60S ribosomal protein L18a	Source:UniProtKB/TrEMBL;Acc:A0A5K4F5A7]	schistosoma_mansoni_prjea36577	60S ribosomal protein L18a [Source:UniProtKB/TrEMBL;Acc:A0A5K4F5A7]			SM_V10_Z
0.538	0.0824562	0.076	0.118959	0.09	0.014	Muscle 1	Smp_300560	BTB domain-containing protein	Source:UniProtKB/TrEMBL;Acc:A0A5K4F304]	schistosoma_mansoni_prjea36577	BTB domain-containing protein [Source:UniProtKB/TrEMBL;Acc:A0A5K4F304]			SM_V10_7
0.538	0.0957824	0.076	0.138185	0.394	0.332	Muscle 1	Smp_009320	Elongin-C	Source:UniProtKB/TrEMBL;Acc:G4VL25]	schistosoma_mansoni_prjea36577	Elongin-C [Source:UniProtKB/TrEMBL;Acc:G4VL25]			SM_V10_6
0.538	0.0833303	0.076	0.12022	0.278	0.205	Muscle 1	Smp_149200	Dynactin subunit 1	Source:UniProtKB/TrEMBL;Acc:A0A3Q0KPL2]	schistosoma_mansoni_prjea36577	Dynactin subunit 1 [Source:UniProtKB/TrEMBL;Acc:A0A3Q0KPL2]			SM_V10_4
0.538	0.0941122	0.076	0.135775	0.368	0.301	Muscle 1	Smp_055200	Dolichyl-diphosphooligosaccharide-proteinglycos yl transferase-related	Source:UniProtKB/TrEMBL;Acc:G4VH66]	schistosoma_mansoni_prjea36577	Dolichyl-diphosphooligosaccharide-proteinglycos yl transferase-related [Source:UniProtKB/TrEMBL;Acc:G4VH66]			SM_V10_4
0.538	0.0760898	0.076	0.109774	0.108	0.033	Muscle 1	Smp_146680	Putative annexin	Source:UniProtKB/TrEMBL;Acc:A0A3Q0KPE4]	schistosoma_mansoni_prjea36577	Putative annexin [Source:UniProtKB/TrEMBL;Acc:A0A3Q0KPE4]			SM_V10_4
0.538	0.0895935	0.076	0.129256	0.163	0.086	Muscle 1	Smp_149050	Xtp3-transactivated protein B, putative	Source:UniProtKB/TrEMBL;Acc:A0A3Q0KPS4]	schistosoma_mansoni_prjea36577	Xtp3-transactivated protein B, putative [Source:UniProtKB/TrEMBL;Acc:A0A3Q0KPS4]			SM_V10_4
0.538	0.085344	0.076	0.123125	0.133	0.058	Muscle 1	Smp_316700	GATA-type domain-containing protein	Source:UniProtKB/TrEMBL;Acc:A0A5K4F7U8]	schistosoma_mansoni_prjea36577	GATA-type domain-containing protein [Source:UniProtKB/TrEMBL;Acc:A0A5K4F7U8]			SM_V10_4
0.538	0.0818686	0.076	0.118111	0.126	0.05	Muscle 1	Smp_079840	uroporphyrinogen-III synthase	Source:UniProtKB/TrEMBL;Acc:A0A3Q0KIB1]	schistosoma_mansoni_prjea36577	uroporphyrinogen-III synthase [Source:UniProtKB/TrEMBL;Acc:A0A3Q0KIB1]			SM_V10_3
0.538	0.0763507	0.076	0.110151	0.115	0.039	Muscle 1	Smp_166790	Putative solute carrier family 39 (zinc transporter)	Source:UniProtKB/TrEMBL;Acc:A0A3Q0KS68]	schistosoma_mansoni_prjea36577	Putative solute carrier family 39 (zinc transporter) [Source:UniProtKB/TrEMBL;Acc:A0A3Q0KS68]			SM_V10_3
0.538	0.0908198	0.076	0.131025	0.183	0.109	Muscle 1	Smp_072080	6-pyruvoyltetrahydropterin synthase	Source:UniProtKB/TrEMBL;Acc:G4M0A6]	schistosoma_mansoni_prjea36577	6-pyruvoyltetrahydropterin synthase [Source:UniProtKB/TrEMBL;Acc:G4M0A6]			SM_V10_2
0.538	0.0724958	0.076	0.104589	0.123	0.047	Muscle 1	Smp_092020	Putative cement protein 3B variant 2	Source:UniProtKB/TrEMBL;Acc:A0A5K4EIE5]	schistosoma_mansoni_prjea36577	Putative cement protein 3B variant 2 [Source:UniProtKB/TrEMBL;Acc:A0A5K4EIE5]			SM_V10_1
0.538	0.0772734	0.076	0.111482	0.154	0.078	Muscle 1	Smp_014170	non-specific serine/threonine protein kinase	Source:UniProtKB/TrEMBL;Acc:A0A3Q0KCJ4]	schistosoma_mansoni_prjea36577	non-specific serine/threonine protein kinase [Source:UniProtKB/TrEMBL;Acc:A0A3Q0KCJ4]			SM_V10_1
0.537	0.0751998	0.074	0.10849	0.102	0.029	Muscle 1	Smp_196110	Ceramidase	Source:UniProtKB/TrEMBL;Acc:A0A3Q0KUG7]	schistosoma_mansoni_prjea36577	Ceramidase [Source:UniProtKB/TrEMBL;Acc:A0A3Q0KUG7]			SM_V10_Z
0.537	0.0738571	0.074	0.106553	0.197	0.122	Muscle 1	Smp_031880	Basigin related; Basigin related; Ig domain-containing protein; Ig domain-containing protein; Ig domain-containing protein	Source:UniProtKB/TrEMBL;Acc:C4Q5U5]	schistosoma_mansoni_prjea36577	Basigin related; Basigin related; Ig domain-containing protein; Ig domain-containing protein; Ig domain-containing protein [Source:UniProtKB/TrEMBL;Acc:C4Q5U5]			SM_V10_7
0.537	0.0945629	0.074	0.136425	0.377	0.317	Muscle 1	Smp_064500	Pre-mRNA-splicing factor SYF2	Source:UniProtKB/TrEMBL;Acc:G4VKB7]	schistosoma_mansoni_prjea36577	Pre-mRNA-splicing factor SYF2 [Source:UniProtKB/TrEMBL;Acc:G4VKB7]			SM_V10_5
0.537	0.0395473	0.074	0.0570547	0.124	0.048	Muscle 1	Smp_136710	Calcium-transporting ATPase	Source:UniProtKB/TrEMBL;Acc:A0A3Q0KMK3]	schistosoma_mansoni_prjea36577	Calcium-transporting ATPase [Source:UniProtKB/TrEMBL;Acc:A0A3Q0KMK3]	SMA2	UniProtKB Gene Name	SM_V10_3
0.537	0.0962043	0.074	0.138794	0.27	0.202	Muscle 1	Smp_028980	ER membrane protein complex subunit 3	Source:UniProtKB/TrEMBL;Acc:A0A3Q0KDR4]	schistosoma_mansoni_prjea36577	ER membrane protein complex subunit 3 [Source:UniProtKB/TrEMBL;Acc:A0A3Q0KDR4]			SM_V10_3
0.537	0.0827205	0.074	0.11934	0.08	0.006	Muscle 1	Smp_121580	TIR domain-containing protein	Source:UniProtKB/TrEMBL;Acc:A0A3Q0KKB7]	schistosoma_mansoni_prjea36577	TIR domain-containing protein [Source:UniProtKB/TrEMBL;Acc:A0A3Q0KKB7]			SM_V10_2
0.537	0.0850429	0.074	0.122691	0.504	0.448	Muscle 1	Smp_089870	Histone H2A	Source:UniProtKB/TrEMBL;Acc:G4VCW3]	schistosoma_mansoni_prjea36577	Histone H2A [Source:UniProtKB/TrEMBL;Acc:G4VCW3]			SM_V10_2
0.537	0.0860896	0.074	0.124201	0.186	0.114	Muscle 1	Smp_157540	Putative smad	Source:UniProtKB/TrEMBL;Acc:G4VAI1]	schistosoma_mansoni_prjea36577	Putative smad [Source:UniProtKB/TrEMBL;Acc:G4VAI1]			SM_V10_1
0.537	0.0720674	0.074	0.103971	0.152	0.077	Muscle 1	Smp_167330	Succinate--CoA ligase	ADP-forming] subunit beta, mitochondrial	schistosoma_mansoni_prjea36577	Succinate--CoA ligase [ADP-forming] subunit beta, mitochondrial [Source:UniProtKB/TrEMBL;Acc:A0A3Q0KS94]			SM_V10_1
0.537	0.100002	0.074	0.144272	0.439	0.385	Muscle 1	Smp_321620	threonine--tRNA ligase	Source:UniProtKB/TrEMBL;Acc:A0A5K4F761]	schistosoma_mansoni_prjea36577	threonine--tRNA ligase [Source:UniProtKB/TrEMBL;Acc:A0A5K4F761]			SM_V10_1
0.536	0.0740297	0.072	0.106802	0.104	0.032	Muscle 1	Smp_139760	Kinesin light chain	Source:UniProtKB/TrEMBL;Acc:A0A3Q0KN32]	schistosoma_mansoni_prjea36577	Kinesin light chain [Source:UniProtKB/TrEMBL;Acc:A0A3Q0KN32]			SM_V10_Z
0.536	0.087156	0.072	0.125739	0.386	0.325	Muscle 1	Smp_032310	Actin-related protein 2/3 complex subunit 3	Source:UniProtKB/TrEMBL;Acc:G4VSI1]	schistosoma_mansoni_prjea36577	Actin-related protein 2/3 complex subunit 3 [Source:UniProtKB/TrEMBL;Acc:G4VSI1]			SM_V10_Z
0.536	0.0710756	0.072	0.10254	0.102	0.03	Muscle 1	Smp_130590	RING-type E3 ubiquitin transferase	Source:UniProtKB/TrEMBL;Acc:A0A3Q0KLM4]	schistosoma_mansoni_prjea36577	RING-type E3 ubiquitin transferase [Source:UniProtKB/TrEMBL;Acc:A0A3Q0KLM4]			SM_V10_Z
0.536	0.0702403	0.072	0.101335	0.098	0.026	Muscle 1	Smp_305490	Calponin-homology (CH) domain-containing protein	Source:UniProtKB/TrEMBL;Acc:A0A5K4F2A5]	schistosoma_mansoni_prjea36577	Calponin-homology (CH) domain-containing protein [Source:UniProtKB/TrEMBL;Acc:A0A5K4F2A5]			SM_V10_Z
0.536	0.0791133	0.072	0.114136	0.083	0.012	Muscle 1	Smp_147420	EGF-like domain-containing protein	Source:UniProtKB/TrEMBL;Acc:A0A3Q0KPI8]	schistosoma_mansoni_prjea36577	EGF-like domain-containing protein [Source:UniProtKB/TrEMBL;Acc:A0A3Q0KPI8]			SM_V10_Z
0.536	0.0621954	0.072	0.0897289	0.142	0.068	Muscle 1	Smp_341830	Sulfotransfer_1 domain-containing protein	Source:UniProtKB/TrEMBL;Acc:A0A5K4FC95]	schistosoma_mansoni_prjea36577	Sulfotransfer_1 domain-containing protein [Source:UniProtKB/TrEMBL;Acc:A0A5K4FC95]			SM_V10_6
0.536	0.0753516	0.072	0.108709	0.151	0.078	Muscle 1	Smp_343520	Smp_343520	Smp_343520~	schistosoma_mansoni_prjea36577				SM_V10_4
0.536	0.0698767	0.072	0.100811	0.112	0.04	Muscle 1	Smp_148460	Putative neurofibromin	Source:UniProtKB/TrEMBL;Acc:A0A5K4EQR7]	schistosoma_mansoni_prjea36577	Putative neurofibromin [Source:UniProtKB/TrEMBL;Acc:A0A5K4EQR7]			SM_V10_2
0.536	0.0692457	0.072	0.0999005	0.269	0.197	Muscle 1	Smp_343470	3-ketodihydrosphingosine reductase	Source:UniProtKB/TrEMBL;Acc:A0A5K4FBC5]	schistosoma_mansoni_prjea36577	3-ketodihydrosphingosine reductase [Source:UniProtKB/TrEMBL;Acc:A0A5K4FBC5]			SM_V10_1
0.536	0.0762263	0.072	0.109971	0.088	0.017	Muscle 1	Smp_129900	Putative sodium-dependent neurotransmitter transporter	Source:UniProtKB/TrEMBL;Acc:A0A5K4ELJ6]	schistosoma_mansoni_prjea36577	Putative sodium-dependent neurotransmitter transporter [Source:UniProtKB/TrEMBL;Acc:A0A5K4ELJ6]			SM_V10_1
0.535	0.00024858	0.07	0.00035863	0.34	0.259	Muscle 1	Smp_054220	V-type proton ATPase subunit G	Source:UniProtKB/TrEMBL;Acc:G4LYK6]	schistosoma_mansoni_prjea36577	V-type proton ATPase subunit G [Source:UniProtKB/TrEMBL;Acc:G4LYK6]			SM_V10_Z
0.535	0.0749272	0.07	0.108097	0.77	0.764	Muscle 1	Smp_136590	COX6C domain-containing protein	Source:UniProtKB/TrEMBL;Acc:G4LX46]	schistosoma_mansoni_prjea36577	COX6C domain-containing protein [Source:UniProtKB/TrEMBL;Acc:G4LX46]			SM_V10_Z
0.535	0.0891633	0.07	0.128635	0.382	0.321	Muscle 1	Smp_059340	Guanine nucleotide-binding protein G(S) subunit alpha	Source:UniProtKB/TrEMBL;Acc:C4QDC6]	schistosoma_mansoni_prjea36577	Guanine nucleotide-binding protein G(S) subunit alpha [Source:UniProtKB/TrEMBL;Acc:C4QDC6]			SM_V10_Z
0.535	0.0773851	0.07	0.111643	0.071	0.001	Muscle 1	Smp_126360	Apple domain-containing protein	Source:UniProtKB/TrEMBL;Acc:A0A3Q0KKY6]	schistosoma_mansoni_prjea36577	Apple domain-containing protein [Source:UniProtKB/TrEMBL;Acc:A0A3Q0KKY6]			SM_V10_Z
0.535	0.074792	0.07	0.107902	0.114	0.043	Muscle 1	Smp_345160	P/Homo B domain-containing protein	Source:UniProtKB/TrEMBL;Acc:A0A5K4FDH6]	schistosoma_mansoni_prjea36577	P/Homo B domain-containing protein [Source:UniProtKB/TrEMBL;Acc:A0A5K4FDH6]			SM_V10_4
0.535	0.0912985	0.07	0.131716	0.571	0.534	Muscle 1	Smp_045510	Small ubiquitin-related modifier	Source:UniProtKB/TrEMBL;Acc:Q2VU48]	schistosoma_mansoni_prjea36577	Small ubiquitin-related modifier [Source:UniProtKB/TrEMBL;Acc:Q2VU48]			SM_V10_4
0.535	0.0714461	0.07	0.103075	0.102	0.032	Muscle 1	Smp_202630	Protein quiver	Source:UniProtKB/TrEMBL;Acc:A0A3Q0KUU7]	schistosoma_mansoni_prjea36577	Protein quiver [Source:UniProtKB/TrEMBL;Acc:A0A3Q0KUU7]			SM_V10_4
0.535	0.0751428	0.07	0.108408	0.093	0.024	Muscle 1	Smp_134910	Serine/threonine kinase	Source:UniProtKB/TrEMBL;Acc:A0A3Q0KME8]	schistosoma_mansoni_prjea36577	Serine/threonine kinase [Source:UniProtKB/TrEMBL;Acc:A0A3Q0KME8]			SM_V10_3
0.535	0.0854463	0.07	0.123273	0.433	0.379	Muscle 1	Smp_010090	Snf7-related	Source:UniProtKB/TrEMBL;Acc:A0A3Q0KC76]	schistosoma_mansoni_prjea36577	Snf7-related [Source:UniProtKB/TrEMBL;Acc:A0A3Q0KC76]			SM_V10_3
0.535	0.0687182	0.07	0.0991394	0.179	0.108	Muscle 1	Smp_333950	non-specific serine/threonine protein kinase	Source:UniProtKB/TrEMBL;Acc:A0A5K4F8V6]	schistosoma_mansoni_prjea36577	non-specific serine/threonine protein kinase [Source:UniProtKB/TrEMBL;Acc:A0A5K4F8V6]			SM_V10_2
0.535	0.0415746	0.07	0.0599794	0.153	0.079	Muscle 1	Smp_332540	Smp_332540	Smp_332540~	schistosoma_mansoni_prjea36577				SM_V10_1
0.534	0.0716051	0.068	0.103304	0.132	0.063	Muscle 1	Smp_001950	Cytochrome b561 domain-containing protein	Source:UniProtKB/TrEMBL;Acc:A0A3Q0KBI4]	schistosoma_mansoni_prjea36577	Cytochrome b561 domain-containing protein [Source:UniProtKB/TrEMBL;Acc:A0A3Q0KBI4]			SM_V10_6
0.534	0.0716482	0.068	0.103366	0.179	0.111	Muscle 1	Smp_156900	Transmembrane protein 208	Source:UniProtKB/TrEMBL;Acc:A0A5K4EUL3]	schistosoma_mansoni_prjea36577	Transmembrane protein 208 [Source:UniProtKB/TrEMBL;Acc:A0A5K4EUL3]			SM_V10_5
0.534	0.0864464	0.068	0.124716	0.512	0.464	Muscle 1	Smp_179130	Small integral membrane protein 12	Source:UniProtKB/TrEMBL;Acc:G4VJX3]	schistosoma_mansoni_prjea36577	Small integral membrane protein 12 [Source:UniProtKB/TrEMBL;Acc:G4VJX3]			SM_V10_5
0.534	0.0728365	0.068	0.105081	0.078	0.011	Muscle 1	Smp_334180	Voltage-gated hydrogen channel 1	Source:UniProtKB/TrEMBL;Acc:A0A5K4FB73]	schistosoma_mansoni_prjea36577	Voltage-gated hydrogen channel 1 [Source:UniProtKB/TrEMBL;Acc:A0A5K4FB73]			SM_V10_4
0.534	0.0712221	0.068	0.102752	0.44	0.385	Muscle 1	Smp_194170	Putative f1	Source:UniProtKB/TrEMBL;Acc:G4V672]	schistosoma_mansoni_prjea36577	Putative f1 [Source:UniProtKB/TrEMBL;Acc:G4V672]			SM_V10_3
0.534	0.0441595	0.068	0.0637087	0.206	0.134	Muscle 1	Smp_167660	Protein phosphatase 1 binding protein, putative	Source:UniProtKB/TrEMBL;Acc:A0A3Q0KSD5]	schistosoma_mansoni_prjea36577	Protein phosphatase 1 binding protein, putative [Source:UniProtKB/TrEMBL;Acc:A0A3Q0KSD5]			SM_V10_3
0.534	0.0710026	0.068	0.102435	0.201	0.133	Muscle 1	Smp_018550	Endosome-associated-trafficking regulator 1	Source:UniProtKB/TrEMBL;Acc:A0A3Q0KCW3]	schistosoma_mansoni_prjea36577	Endosome-associated-trafficking regulator 1 [Source:UniProtKB/TrEMBL;Acc:A0A3Q0KCW3]			SM_V10_3
0.534	0.0578476	0.068	0.0834565	0.126	0.056	Muscle 1	Smp_246970	Pleckstrin homology domain-containing family G member 7	Source:UniProtKB/TrEMBL;Acc:A0A5K4F0Z4]	schistosoma_mansoni_prjea36577	Pleckstrin homology domain-containing family G member 7 [Source:UniProtKB/TrEMBL;Acc:A0A5K4F0Z4]			SM_V10_3
0.534	0.0717625	0.068	0.103531	0.103	0.035	Muscle 1	Smp_167010	Putative talin	Source:UniProtKB/TrEMBL;Acc:A0A3Q0KS78]	schistosoma_mansoni_prjea36577	Putative talin [Source:UniProtKB/TrEMBL;Acc:A0A3Q0KS78]			SM_V10_2
0.534	0.0789544	0.068	0.113907	0.215	0.149	Muscle 1	Smp_131800	non-specific serine/threonine protein kinase	Source:UniProtKB/TrEMBL;Acc:G4LW63]	schistosoma_mansoni_prjea36577	non-specific serine/threonine protein kinase [Source:UniProtKB/TrEMBL;Acc:G4LW63]			SM_V10_1
0.533	0.0584133	0.066	0.0842726	0.092	0.025	Muscle 1	Smp_163720	Putative endophilin B1	Source:UniProtKB/TrEMBL;Acc:A0A3Q0KS21]	schistosoma_mansoni_prjea36577	Putative endophilin B1 [Source:UniProtKB/TrEMBL;Acc:A0A3Q0KS21]			SM_V10_Z
0.533	0.0914995	0.066	0.132006	0.33	0.274	Muscle 1	Smp_173910	Nuclear movement protein related	Source:UniProtKB/TrEMBL;Acc:G4VTR7]	schistosoma_mansoni_prjea36577	Nuclear movement protein related [Source:UniProtKB/TrEMBL;Acc:G4VTR7]			SM_V10_Z
0.533	0.0667631	0.066	0.0963187	0.069	0.004	Muscle 1	Smp_332380	ZP domain-containing protein	Source:UniProtKB/TrEMBL;Acc:A0A5K4FAF9]	schistosoma_mansoni_prjea36577	ZP domain-containing protein [Source:UniProtKB/TrEMBL;Acc:A0A5K4FAF9]			SM_V10_7
0.533	0.0676837	0.066	0.0976469	0.304	0.24	Muscle 1	Smp_247460	ACB domain-containing protein	Source:UniProtKB/TrEMBL;Acc:A0A5K4F4D1]	schistosoma_mansoni_prjea36577	ACB domain-containing protein [Source:UniProtKB/TrEMBL;Acc:A0A5K4F4D1]			SM_V10_4
0.533	0.0848555	0.066	0.122421	0.466	0.423	Muscle 1	Smp_092380	Protein BUD31 homolog	Source:UniProtKB/TrEMBL;Acc:G4VHY6]	schistosoma_mansoni_prjea36577	Protein BUD31 homolog [Source:UniProtKB/TrEMBL;Acc:G4VHY6]			SM_V10_4
0.533	0.0748535	0.066	0.107991	0.765	0.775	Muscle 1	Smp_030290	Putative prefoldin subunit 2	Source:UniProtKB/TrEMBL;Acc:G4VFN5]	schistosoma_mansoni_prjea36577	Putative prefoldin subunit 2 [Source:UniProtKB/TrEMBL;Acc:G4VFN5]			SM_V10_3
0.533	0.0814173	0.066	0.11746	0.148	0.083	Muscle 1	Smp_302330	Phosphatidate cytidylyltransferase, mitochondrial	Source:UniProtKB/TrEMBL;Acc:G4V8Y8]	schistosoma_mansoni_prjea36577	Phosphatidate cytidylyltransferase, mitochondrial [Source:UniProtKB/TrEMBL;Acc:G4V8Y8]			SM_V10_1
0.533	0.0994383	0.066	0.143459	0.398	0.351	Muscle 1	Smp_118220	Putative ubiquitin-conjugating enzyme rad6	Source:UniProtKB/TrEMBL;Acc:G4V772]	schistosoma_mansoni_prjea36577	Putative ubiquitin-conjugating enzyme rad6 [Source:UniProtKB/TrEMBL;Acc:G4V772]			SM_V10_1
0.533	0.0683586	0.066	0.0986206	0.075	0.01	Muscle 1	Smp_007270	Putative alpha-actinin	Source:UniProtKB/TrEMBL;Acc:G4VB07]	schistosoma_mansoni_prjea36577	Putative alpha-actinin [Source:UniProtKB/TrEMBL;Acc:G4VB07]			SM_V10_1
0.533	0.0684763	0.066	0.0987904	0.073	0.007	Muscle 1	Smp_020270	Voltage-dependent L-type calcium channel subunit alpha	Source:UniProtKB/TrEMBL;Acc:A0A5K4EAX0]	schistosoma_mansoni_prjea36577	Voltage-dependent L-type calcium channel subunit alpha [Source:UniProtKB/TrEMBL;Acc:A0A5K4EAX0]			SM_V10_1
0.532	0.0648111	0.064	0.0935027	0.085	0.022	Muscle 1	Smp_244490	Smp_244490	Smp_244490~	schistosoma_mansoni_prjea36577				SM_V10_Z
0.532	0.0742597	0.064	0.107134	0.197	0.134	Muscle 1	Smp_037190	Arf-related protein 1, arfrp1	Source:UniProtKB/TrEMBL;Acc:A0A3Q0KEI7]	schistosoma_mansoni_prjea36577	Arf-related protein 1, arfrp1 [Source:UniProtKB/TrEMBL;Acc:A0A3Q0KEI7]			SM_V10_Z
0.532	0.0698722	0.064	0.100804	0.088	0.024	Muscle 1	Smp_135020	Putative oxalate:formate antiporter	Source:UniProtKB/TrEMBL;Acc:A0A3Q0KMB4]	schistosoma_mansoni_prjea36577	Putative oxalate:formate antiporter [Source:UniProtKB/TrEMBL;Acc:A0A3Q0KMB4]			SM_V10_Z
0.532	0.0508224	0.064	0.0733212	0.106	0.04	Muscle 1	Smp_016600	Amino acid transporter	Source:UniProtKB/TrEMBL;Acc:A0A3Q0KCR1]	schistosoma_mansoni_prjea36577	Amino acid transporter [Source:UniProtKB/TrEMBL;Acc:A0A3Q0KCR1]			SM_V10_6
0.532	0.0784534	0.064	0.113184	0.763	0.758	Muscle 1	Smp_135740	Splicing factor 3B subunit 5	Source:UniProtKB/TrEMBL;Acc:A0A3Q0KMI8]	schistosoma_mansoni_prjea36577	Splicing factor 3B subunit 5 [Source:UniProtKB/TrEMBL;Acc:A0A3Q0KMI8]			SM_V10_6
0.532	0.0876219	0.064	0.126412	0.476	0.437	Muscle 1	Smp_210280	Putative beta-1,4-galactosyltransferase	Source:UniProtKB/TrEMBL;Acc:A0A3Q0KV83]	schistosoma_mansoni_prjea36577	Putative beta-1,4-galactosyltransferase [Source:UniProtKB/TrEMBL;Acc:A0A3Q0KV83]			SM_V10_4
0.532	0.0773271	0.064	0.111559	0.555	0.512	Muscle 1	Smp_018310	Coiled-coil domain-containing protein 86	Source:UniProtKB/TrEMBL;Acc:G4VGQ0]	schistosoma_mansoni_prjea36577	Coiled-coil domain-containing protein 86 [Source:UniProtKB/TrEMBL;Acc:G4VGQ0]			SM_V10_3
0.532	0.0673198	0.064	0.0971219	0.086	0.023	Muscle 1	Smp_129980	TIR domain-containing protein	Source:UniProtKB/TrEMBL;Acc:A0A3Q0KLN2]	schistosoma_mansoni_prjea36577	TIR domain-containing protein [Source:UniProtKB/TrEMBL;Acc:A0A3Q0KLN2]			SM_V10_2
0.532	0.054298	0.064	0.0783354	0.324	0.257	Muscle 1	Smp_023170	RAB3GAP2_C domain-containing protein	Source:UniProtKB/TrEMBL;Acc:A0A3Q0KDB9]	schistosoma_mansoni_prjea36577	RAB3GAP2_C domain-containing protein [Source:UniProtKB/TrEMBL;Acc:A0A3Q0KDB9]			SM_V10_2
0.532	0.075515	0.064	0.108945	0.097	0.033	Muscle 1	Smp_167190	Smp_167190	Source:UniProtKB/TrEMBL;Acc:A0A3Q0KS99]	schistosoma_mansoni_prjea36577	Smp_167190 [Source:UniProtKB/TrEMBL;Acc:A0A3Q0KS99]			SM_V10_1
0.532	0.0828963	0.064	0.119594	0.078	0.015	Muscle 1	Smp_332480	TNFR	Source:UniProtKB/TrEMBL;Acc:A0A5K4FBV6]	schistosoma_mansoni_prjea36577	TNFR [Source:UniProtKB/TrEMBL;Acc:A0A5K4FBV6]			SM_V10_1
0.532	0.0860701	0.064	0.124173	0.076	0.012	Muscle 1	Smp_093210	Putative amiloride-sensitive sodium channel	Source:UniProtKB/TrEMBL;Acc:A0A3Q0KJ87]	schistosoma_mansoni_prjea36577	Putative amiloride-sensitive sodium channel [Source:UniProtKB/TrEMBL;Acc:A0A3Q0KJ87]			SM_V10_1
0.531	0.0383608	0.062	0.0553429	0.998	0.997	Muscle 1	Smp_074470	40S ribosomal protein S23	Source:UniProtKB/TrEMBL;Acc:G4VRC6]	schistosoma_mansoni_prjea36577	40S ribosomal protein S23 [Source:UniProtKB/TrEMBL;Acc:G4VRC6]			SM_V10_Z
0.531	0.0655142	0.062	0.094517	0.071	0.009	Muscle 1	Smp_157670	PDZ domain-containing protein	Source:UniProtKB/TrEMBL;Acc:A0A3Q0KR42]	schistosoma_mansoni_prjea36577	PDZ domain-containing protein [Source:UniProtKB/TrEMBL;Acc:A0A3Q0KR42]			SM_V10_Z
0.531	0.0569448	0.062	0.082154	0.111	0.048	Muscle 1	Smp_017880	Smp_017880	Smp_017880~	schistosoma_mansoni_prjea36577				SM_V10_Z
0.531	0.0734735	0.062	0.106	0.12	0.059	Muscle 1	Smp_125150	Glycosyltransferase family 61 protein	Source:UniProtKB/TrEMBL;Acc:A0A3Q0KKV8]	schistosoma_mansoni_prjea36577	Glycosyltransferase family 61 protein [Source:UniProtKB/TrEMBL;Acc:A0A3Q0KKV8]			SM_V10_7
0.531	0.0129789	0.062	0.0187246	0.789	0.73	Muscle 1	Smp_329680	28S ribosomal protein S21, mitochondrial	Source:UniProtKB/TrEMBL;Acc:A0A5K4F6V7]	schistosoma_mansoni_prjea36577	28S ribosomal protein S21, mitochondrial [Source:UniProtKB/TrEMBL;Acc:A0A5K4F6V7]			SM_V10_4
0.531	0.0692935	0.062	0.0999695	0.111	0.048	Muscle 1	Smp_103530	SWI/SNF-related chromatin binding protein	Source:UniProtKB/TrEMBL;Acc:A0A3Q0KJU0]	schistosoma_mansoni_prjea36577	SWI/SNF-related chromatin binding protein [Source:UniProtKB/TrEMBL;Acc:A0A3Q0KJU0]	HMGB3	UniProtKB Gene Name	SM_V10_4
0.531	0.0609781	0.062	0.0879728	0.084	0.022	Muscle 1	Smp_335930	Cellulase domain-containing protein	Source:UniProtKB/TrEMBL;Acc:A0A5K4FBR8]	schistosoma_mansoni_prjea36577	Cellulase domain-containing protein [Source:UniProtKB/TrEMBL;Acc:A0A5K4FBR8]			SM_V10_3
0.531	0.0171996	0.062	0.0248137	0.085	0.022	Muscle 1	Smp_342940	UPF0506 domain-containing protein	Source:UniProtKB/TrEMBL;Acc:A0A5K4FEX6]	schistosoma_mansoni_prjea36577	UPF0506 domain-containing protein [Source:UniProtKB/TrEMBL;Acc:A0A5K4FEX6]			SM_V10_1
0.531	0.0638138	0.062	0.0920638	0.233	0.172	Muscle 1	Smp_097180	5'-nucleotidase	Source:UniProtKB/TrEMBL;Acc:A0A3Q0KJH9]	schistosoma_mansoni_prjea36577	5'-nucleotidase [Source:UniProtKB/TrEMBL;Acc:A0A3Q0KJH9]			SM_V10_1
0.531	0.0641522	0.062	0.092552	0.069	0.006	Muscle 1	Smp_302990	Cadherin_2 domain-containing protein	Source:UniProtKB/TrEMBL;Acc:A0A5K4F5A4]	schistosoma_mansoni_prjea36577	Cadherin_2 domain-containing protein [Source:UniProtKB/TrEMBL;Acc:A0A5K4F5A4]			SM_V10_1
0.531	0.0553976	0.062	0.0799218	0.313	0.249	Muscle 1	Smp_028170	UBZ1-type domain-containing protein	Source:UniProtKB/TrEMBL;Acc:G4V615]	schistosoma_mansoni_prjea36577	UBZ1-type domain-containing protein [Source:UniProtKB/TrEMBL;Acc:G4V615]			SM_V10_1
0.531	0.0627479	0.062	0.0905261	0.1	0.039	Muscle 1	Smp_315790	Smp_127420	Source:UniProtKB/TrEMBL;Acc:A0A5K4F673]	schistosoma_mansoni_prjea36577	Smp_127420 [Source:UniProtKB/TrEMBL;Acc:A0A5K4F673]			SM_V10_1
0.531	0.0651324	0.062	0.0939662	0.077	0.015	Muscle 1	Smp_008490	Glycogenin-related	Source:UniProtKB/TrEMBL;Acc:A0A3Q0KC44]	schistosoma_mansoni_prjea36577	Glycogenin-related [Source:UniProtKB/TrEMBL;Acc:A0A3Q0KC44]			SM_V10_1
0.53	0.0754731	0.06	0.108885	0.26	0.202	Muscle 1	Smp_070380	Neutral sphingomyelinase	Source:UniProtKB/TrEMBL;Acc:A0A3Q0KHF6]	schistosoma_mansoni_prjea36577	Neutral sphingomyelinase [Source:UniProtKB/TrEMBL;Acc:A0A3Q0KHF6]			SM_V10_Z
0.53	0.0434565	0.06	0.0626945	0.371	0.312	Muscle 1	Smp_030500	Glycerol-3-phosphate dehydrogenase	NAD(+)]	schistosoma_mansoni_prjea36577	Glycerol-3-phosphate dehydrogenase [NAD(+)] [Source:UniProtKB/TrEMBL;Acc:C4Q5J8]			SM_V10_Z
0.53	0.0653773	0.06	0.0943195	0.208	0.148	Muscle 1	Smp_057650	IST1 homolog	Source:UniProtKB/TrEMBL;Acc:G4M074]	schistosoma_mansoni_prjea36577	IST1 homolog [Source:UniProtKB/TrEMBL;Acc:G4M074]			SM_V10_Z
0.53	0.0865198	0.06	0.124822	0.317	0.265	Muscle 1	Smp_090805	Smp_090805	Smp_090805~	schistosoma_mansoni_prjea36577				SM_V10_Z
0.53	0.0597452	0.06	0.086194	0.093	0.034	Muscle 1	Smp_043670	ATP-dependent 6-phosphofructokinase	Source:UniProtKB/TrEMBL;Acc:A0A3Q0KF43]	schistosoma_mansoni_prjea36577	ATP-dependent 6-phosphofructokinase [Source:UniProtKB/TrEMBL;Acc:A0A3Q0KF43]			SM_V10_5
0.53	0.0833478	0.06	0.120245	0.279	0.228	Muscle 1	Smp_303300	Immediate early response 3-interacting protein 1	Source:UniProtKB/TrEMBL;Acc:A0A5K4F5B1]	schistosoma_mansoni_prjea36577	Immediate early response 3-interacting protein 1 [Source:UniProtKB/TrEMBL;Acc:A0A5K4F5B1]			SM_V10_4
0.53	0.063648	0.06	0.0918247	0.075	0.015	Muscle 1	Smp_145930	Matrix metallopeptidase-7 (M10 family)	Source:UniProtKB/TrEMBL;Acc:A0A3Q0KP46]	schistosoma_mansoni_prjea36577	Matrix metallopeptidase-7 (M10 family) [Source:UniProtKB/TrEMBL;Acc:A0A3Q0KP46]			SM_V10_3
0.53	0.0505306	0.06	0.0729003	0.118	0.056	Muscle 1	Smp_159190	Thiamin pyrophosphokinase-related	Source:UniProtKB/TrEMBL;Acc:A0A3Q0KR39]	schistosoma_mansoni_prjea36577	Thiamin pyrophosphokinase-related [Source:UniProtKB/TrEMBL;Acc:A0A3Q0KR39]			SM_V10_2
0.53	0.0523946	0.06	0.0755894	0.112	0.052	Muscle 1	Smp_245900	1-phosphatidylinositol 4,5-bisphosphate phosphodiesterase	Source:UniProtKB/TrEMBL;Acc:A0A5K4F0P8]	schistosoma_mansoni_prjea36577	1-phosphatidylinositol 4,5-bisphosphate phosphodiesterase [Source:UniProtKB/TrEMBL;Acc:A0A5K4F0P8]			SM_V10_2
0.53	0.0691475	0.06	0.0997587	0.162	0.102	Muscle 1	Smp_032250	Family S12 unassigned peptidase (S12 family)	Source:UniProtKB/TrEMBL;Acc:A0A3Q0KE42]	schistosoma_mansoni_prjea36577	Family S12 unassigned peptidase (S12 family) [Source:UniProtKB/TrEMBL;Acc:A0A3Q0KE42]			SM_V10_1
0.53	0.0582452	0.06	0.0840301	0.08	0.021	Muscle 1	Smp_012780	ADP-ribosyl cyclase/cyclic ADP-ribose hydrolase	Source:UniProtKB/TrEMBL;Acc:A0A3Q0KCF6]	schistosoma_mansoni_prjea36577	ADP-ribosyl cyclase/cyclic ADP-ribose hydrolase [Source:UniProtKB/TrEMBL;Acc:A0A3Q0KCF6]			SM_V10_1
0.53	0.0637768	0.06	0.0920105	0.08	0.019	Muscle 1	Smp_019950	Protein phosphatase 1 regulatory subunit 14B	Source:UniProtKB/TrEMBL;Acc:A0A3Q0KD16]	schistosoma_mansoni_prjea36577	Protein phosphatase 1 regulatory subunit 14B [Source:UniProtKB/TrEMBL;Acc:A0A3Q0KD16]			SM_V10_1
0.529	0.0553268	0.058	0.0798197	0.106	0.046	Muscle 1	Smp_143840	Alpha-1,4 glucan phosphorylase	Source:UniProtKB/TrEMBL;Acc:A0A3Q0KNL7]	schistosoma_mansoni_prjea36577	Alpha-1,4 glucan phosphorylase [Source:UniProtKB/TrEMBL;Acc:A0A3Q0KNL7]			SM_V10_Z
0.529	0.0549527	0.058	0.0792799	0.175	0.115	Muscle 1	Smp_170160	5-AMP-activated protein kinase, beta subunit,putative	Source:UniProtKB/TrEMBL;Acc:A0A3Q0KT06]	schistosoma_mansoni_prjea36577	5-AMP-activated protein kinase, beta subunit,putative [Source:UniProtKB/TrEMBL;Acc:A0A3Q0KT06]			SM_V10_Z
0.529	0.0707271	0.058	0.102038	0.223	0.167	Muscle 1	Smp_060270	Protein jagunal 1	Source:UniProtKB/TrEMBL;Acc:G4VQM4]	schistosoma_mansoni_prjea36577	Protein jagunal 1 [Source:UniProtKB/TrEMBL;Acc:G4VQM4]			SM_V10_Z
0.529	0.0163336	0.058	0.0235643	0.97	0.955	Muscle 1	Smp_038510	60S ribosomal protein L6	Source:UniProtKB/TrEMBL;Acc:G4VTG3]	schistosoma_mansoni_prjea36577	60S ribosomal protein L6 [Source:UniProtKB/TrEMBL;Acc:G4VTG3]			SM_V10_Z
0.529	0.0626093	0.058	0.0903261	0.579	0.549	Muscle 1	Smp_080370	BZIP domain-containing protein	Source:UniProtKB/TrEMBL;Acc:G4VTP3]	schistosoma_mansoni_prjea36577	BZIP domain-containing protein [Source:UniProtKB/TrEMBL;Acc:G4VTP3]			SM_V10_Z
0.529	0.051904	0.058	0.0748817	0.135	0.077	Muscle 1	Smp_214050	guanylate kinase	Source:UniProtKB/TrEMBL;Acc:A0A5K4F2K4]	schistosoma_mansoni_prjea36577	guanylate kinase [Source:UniProtKB/TrEMBL;Acc:A0A5K4F2K4]			SM_V10_6
0.529	0.0733775	0.058	0.105861	0.06	0.001	Muscle 1	Smp_203200	Smp_203200	Source:UniProtKB/TrEMBL;Acc:G4VKY9]	schistosoma_mansoni_prjea36577	Smp_203200 [Source:UniProtKB/TrEMBL;Acc:G4VKY9]			SM_V10_6
0.529	0.066784	0.058	0.096349	0.096	0.038	Muscle 1	Smp_148870	AIP3 domain-containing protein	Source:UniProtKB/TrEMBL;Acc:A0A3Q0KPJ2]	schistosoma_mansoni_prjea36577	AIP3 domain-containing protein [Source:UniProtKB/TrEMBL;Acc:A0A3Q0KPJ2]			SM_V10_4
0.529	0.062985	0.058	0.0908681	0.074	0.015	Muscle 1	Smp_156500	Ras-GEF domain-containing protein	Source:UniProtKB/TrEMBL;Acc:A0A3Q0KQN9]	schistosoma_mansoni_prjea36577	Ras-GEF domain-containing protein [Source:UniProtKB/TrEMBL;Acc:A0A3Q0KQN9]			SM_V10_2
0.529	0.0672177	0.058	0.0969746	0.074	0.017	Muscle 1	Smp_301990	Neurexin-4	Source:UniProtKB/TrEMBL;Acc:A0A5K4F366]	schistosoma_mansoni_prjea36577	Neurexin-4 [Source:UniProtKB/TrEMBL;Acc:A0A5K4F366]			SM_V10_1
0.528	0.0551405	0.056	0.079551	0.334	0.279	Muscle 1	Smp_039740	Putative pre-mRNA-processing ATP-dependent RNA helicase prp5	Source:UniProtKB/TrEMBL;Acc:A0A3Q0KER9]	schistosoma_mansoni_prjea36577	Putative pre-mRNA-processing ATP-dependent RNA helicase prp5 [Source:UniProtKB/TrEMBL;Acc:A0A3Q0KER9]			SM_V10_Z
0.528	0.058793	0.056	0.0848204	0.08	0.024	Muscle 1	Smp_174260	Thyroid hormone receptor,putative	Source:UniProtKB/TrEMBL;Acc:C4QMG1]	schistosoma_mansoni_prjea36577	Thyroid hormone receptor,putative [Source:UniProtKB/TrEMBL;Acc:C4QMG1]			SM_V10_7
0.528	0.0674992	0.056	0.0973808	0.256	0.205	Muscle 1	Smp_175660	Endoplasmic reticulum transmembrane protein	Source:UniProtKB/TrEMBL;Acc:A0A5K4EXK8]	schistosoma_mansoni_prjea36577	Endoplasmic reticulum transmembrane protein [Source:UniProtKB/TrEMBL;Acc:A0A5K4EXK8]			SM_V10_7
0.528	0.0584862	0.056	0.0843778	0.086	0.03	Muscle 1	Smp_158620	Retinaldehyde binding protein-related	Source:UniProtKB/TrEMBL;Acc:G4LZ90]	schistosoma_mansoni_prjea36577	Retinaldehyde binding protein-related [Source:UniProtKB/TrEMBL;Acc:G4LZ90]			SM_V10_6
0.528	0.0608422	0.056	0.0877767	0.536	0.497	Muscle 1	Smp_020770	Dolichyl-diphosphooligosaccharide--protein glycosyltransferase subunit DAD1	Source:UniProtKB/TrEMBL;Acc:G4LYA4]	schistosoma_mansoni_prjea36577	Dolichyl-diphosphooligosaccharide--protein glycosyltransferase subunit DAD1 [Source:UniProtKB/TrEMBL;Acc:G4LYA4]			SM_V10_5
0.528	0.0566369	0.056	0.0817097	0.078	0.021	Muscle 1	Smp_042020	ATP-diphosphohydrolase 1	Source:UniProtKB/TrEMBL;Acc:Q7YTA4]	schistosoma_mansoni_prjea36577	ATP-diphosphohydrolase 1 [Source:UniProtKB/TrEMBL;Acc:Q7YTA4]	ATPDase1	UniProtKB Gene Name	SM_V10_4
0.528	0.0626747	0.056	0.0904205	0.062	0.006	Muscle 1	Smp_346500	TMEM132 domain-containing protein	Source:UniProtKB/TrEMBL;Acc:A0A5K4FF81]	schistosoma_mansoni_prjea36577	TMEM132 domain-containing protein [Source:UniProtKB/TrEMBL;Acc:A0A5K4FF81]			SM_V10_3
0.528	0.0607799	0.056	0.0876869	0.203	0.146	Muscle 1	Smp_159350	Platelet binding protein-related	Source:UniProtKB/TrEMBL;Acc:A0A5K4ETF3]	schistosoma_mansoni_prjea36577	Platelet binding protein-related [Source:UniProtKB/TrEMBL;Acc:A0A5K4ETF3]			SM_V10_2
0.528	0.0252262	0.056	0.0363938	0.975	0.962	Muscle 1	Smp_346040	Ribosomal protein L19	Source:UniProtKB/TrEMBL;Acc:A0A5K4FF17]	schistosoma_mansoni_prjea36577	Ribosomal protein L19 [Source:UniProtKB/TrEMBL;Acc:A0A5K4FF17]			SM_V10_2
0.528	0.0621497	0.056	0.0896631	0.125	0.07	Muscle 1	Smp_141650	RIC3 domain-containing protein	Source:UniProtKB/TrEMBL;Acc:A0A3Q0KNM4]	schistosoma_mansoni_prjea36577	RIC3 domain-containing protein [Source:UniProtKB/TrEMBL;Acc:A0A3Q0KNM4]			SM_V10_1
0.528	0.0575411	0.056	0.0830143	0.072	0.015	Muscle 1	Smp_140520	Putative ank repeat-containing	Source:UniProtKB/TrEMBL;Acc:A0A3Q0KN37]	schistosoma_mansoni_prjea36577	Putative ank repeat-containing [Source:UniProtKB/TrEMBL;Acc:A0A3Q0KN37]			SM_V10_1
0.527	0.0563631	0.054	0.0813148	0.061	0.006	Muscle 1	Smp_340530	Transmembrane protein 26	Source:UniProtKB/TrEMBL;Acc:A0A5K4FE22]	schistosoma_mansoni_prjea36577	Transmembrane protein 26 [Source:UniProtKB/TrEMBL;Acc:A0A5K4FE22]			SM_V10_Z
0.527	0.0589415	0.054	0.0850346	0.077	0.022	Muscle 1	Smp_337390	Ribosome biogenesis regulatory protein	Source:UniProtKB/TrEMBL;Acc:A0A5K4F957]	schistosoma_mansoni_prjea36577	Ribosome biogenesis regulatory protein [Source:UniProtKB/TrEMBL;Acc:A0A5K4F957]			SM_V10_Z
0.527	0.061352	0.054	0.0885123	0.058	0.003	Muscle 1	Smp_170020	Putative neuropeptide receptor	Source:UniProtKB/TrEMBL;Acc:A0A5K4EXN7]	schistosoma_mansoni_prjea36577	Putative neuropeptide receptor [Source:UniProtKB/TrEMBL;Acc:A0A5K4EXN7]			SM_V10_Z
0.527	0.0369748	0.054	0.0533434	0.977	0.961	Muscle 1	Smp_082240	Histone H3	Source:UniProtKB/TrEMBL;Acc:C4QJB5]	schistosoma_mansoni_prjea36577	Histone H3 [Source:UniProtKB/TrEMBL;Acc:C4QJB5]			SM_V10_Z
0.527	0.0653694	0.054	0.0943082	0.092	0.037	Muscle 1	Smp_198680	Heat shock protein 70 (Hsp70)-interacting protein, putative	Source:UniProtKB/TrEMBL;Acc:A0A3Q0KUL8]	schistosoma_mansoni_prjea36577	Heat shock protein 70 (Hsp70)-interacting protein, putative [Source:UniProtKB/TrEMBL;Acc:A0A3Q0KUL8]			SM_V10_Z
0.527	0.0481031	0.054	0.0693981	0.097	0.042	Muscle 1	Smp_123050	Putative regulator of G protein signaling 17, 19, 20 (Rgs17, 19, 20)	Source:UniProtKB/TrEMBL;Acc:A0A3Q0KKH0]	schistosoma_mansoni_prjea36577	Putative regulator of G protein signaling 17, 19, 20 (Rgs17, 19, 20) [Source:UniProtKB/TrEMBL;Acc:A0A3Q0KKH0]			SM_V10_6
0.527	0.0478249	0.054	0.0689967	0.652	0.603	Muscle 1	Smp_174720	NADH-ubiquinone oxidoreductase MWFE subunit	Source:UniProtKB/TrEMBL;Acc:A0A3Q0KTR6]	schistosoma_mansoni_prjea36577	NADH-ubiquinone oxidoreductase MWFE subunit [Source:UniProtKB/TrEMBL;Acc:A0A3Q0KTR6]			SM_V10_6
0.527	0.0209386	0.054	0.030208	0.991	0.974	Muscle 1	Smp_042090	Putative 60s ribosomal protein L10a	Source:UniProtKB/TrEMBL;Acc:G4VJT2]	schistosoma_mansoni_prjea36577	Putative 60s ribosomal protein L10a [Source:UniProtKB/TrEMBL;Acc:G4VJT2]			SM_V10_4
0.527	0.0573996	0.054	0.0828101	0.123	0.07	Muscle 1	Smp_126460	Serine/threonine kinase	Source:UniProtKB/TrEMBL;Acc:A0A3Q0KL22]	schistosoma_mansoni_prjea36577	Serine/threonine kinase [Source:UniProtKB/TrEMBL;Acc:A0A3Q0KL22]			SM_V10_4
0.527	0.0674826	0.054	0.0973568	0.348	0.298	Muscle 1	Smp_202680	Late endosomal/lysosomal adaptor and MAPK and MTOR activator 5	Source:UniProtKB/TrEMBL;Acc:A0A3Q0KVC2]	schistosoma_mansoni_prjea36577	Late endosomal/lysosomal adaptor and MAPK and MTOR activator 5 [Source:UniProtKB/TrEMBL;Acc:A0A3Q0KVC2]			SM_V10_4
0.527	0.0384477	0.054	0.0554683	0.218	0.161	Muscle 1	Smp_315900	Calcium-transporting ATPase	Source:UniProtKB/TrEMBL;Acc:A0A5K4F7M1]	schistosoma_mansoni_prjea36577	Calcium-transporting ATPase [Source:UniProtKB/TrEMBL;Acc:A0A5K4F7M1]			SM_V10_4
0.527	0.057307	0.054	0.0826765	0.089	0.035	Muscle 1	Smp_084890	glycerophosphocholine cholinephosphodiesterase	Source:UniProtKB/TrEMBL;Acc:G4VFF8]	schistosoma_mansoni_prjea36577	glycerophosphocholine cholinephosphodiesterase [Source:UniProtKB/TrEMBL;Acc:G4VFF8]			SM_V10_3
0.527	0.0628416	0.054	0.0906612	0.143	0.089	Muscle 1	Smp_345520	CCA tRNA nucleotidyltransferase 1, mitochondrial	Source:UniProtKB/TrEMBL;Acc:A0A5K4FG35]	schistosoma_mansoni_prjea36577	CCA tRNA nucleotidyltransferase 1, mitochondrial [Source:UniProtKB/TrEMBL;Acc:A0A5K4FG35]			SM_V10_3
0.527	0.0632269	0.054	0.0912171	0.2	0.147	Muscle 1	Smp_266740	Smp_266740	Smp_266740~	schistosoma_mansoni_prjea36577				SM_V10_2
0.527	0.0572868	0.054	0.0826474	0.175	0.122	Muscle 1	Smp_090890	Serine/threonine protein kinase	Source:UniProtKB/TrEMBL;Acc:G4V8L0]	schistosoma_mansoni_prjea36577	Serine/threonine protein kinase [Source:UniProtKB/TrEMBL;Acc:G4V8L0]			SM_V10_1
0.527	0.0601631	0.054	0.086797	0.344	0.295	Muscle 1	Smp_033610	NADH dehydrogenase	ubiquinone] 1 beta subcomplex subunit 7	schistosoma_mansoni_prjea36577	NADH dehydrogenase [ubiquinone] 1 beta subcomplex subunit 7 [Source:UniProtKB/TrEMBL;Acc:G4LVB0]			SM_V10_1
0.527	0.0523549	0.054	0.0755322	0.162	0.107	Muscle 1	Smp_140390	Histone-lysine N-methyltransferase	Source:UniProtKB/TrEMBL;Acc:A0A3Q0KNC6]	schistosoma_mansoni_prjea36577	Histone-lysine N-methyltransferase [Source:UniProtKB/TrEMBL;Acc:A0A3Q0KNC6]			SM_V10_1
0.527	0.0534038	0.054	0.0770454	0.081	0.027	Muscle 1	Smp_141360	Pyruvate carboxylase	Source:UniProtKB/TrEMBL;Acc:A0A3Q0KND4]	schistosoma_mansoni_prjea36577	Pyruvate carboxylase [Source:UniProtKB/TrEMBL;Acc:A0A3Q0KND4]			SM_V10_1
0.527	0.0599214	0.054	0.0864483	0.194	0.142	Muscle 1	Smp_152270	Essential MCU regulator, mitochondrial	Source:UniProtKB/TrEMBL;Acc:A0A3Q0KQ20]	schistosoma_mansoni_prjea36577	Essential MCU regulator, mitochondrial [Source:UniProtKB/TrEMBL;Acc:A0A3Q0KQ20]			SM_V10_1
0.526	0.0789286	0.052	0.11387	0.429	0.398	Muscle 1	Smp_051230	Tar DNA-binding protein, putative	Source:UniProtKB/TrEMBL;Acc:G4LY33]	schistosoma_mansoni_prjea36577	Tar DNA-binding protein, putative [Source:UniProtKB/TrEMBL;Acc:G4LY33]			SM_V10_Z
0.526	0.0586917	0.052	0.0846742	0.095	0.042	Muscle 1	Smp_045920	MARVEL domain-containing protein	Source:UniProtKB/TrEMBL;Acc:A0A3Q0KFC0]	schistosoma_mansoni_prjea36577	MARVEL domain-containing protein [Source:UniProtKB/TrEMBL;Acc:A0A3Q0KFC0]			SM_V10_Z
0.526	0.0554688	0.052	0.0800246	0.056	0.004	Muscle 1	Smp_148180	Smp_148180	Smp_148180~	schistosoma_mansoni_prjea36577				SM_V10_Z
0.526	0.0289489	0.052	0.0417644	0.151	0.095	Muscle 1	Smp_130300	Sodium/potassium-transporting ATPase subunit alpha	Source:UniProtKB/TrEMBL;Acc:A0A3Q0KLP2]	schistosoma_mansoni_prjea36577	Sodium/potassium-transporting ATPase subunit alpha [Source:UniProtKB/TrEMBL;Acc:A0A3Q0KLP2]			SM_V10_7
0.526	0.0542281	0.052	0.0782346	0.082	0.029	Muscle 1	Smp_343430	Anoctamin	Source:UniProtKB/TrEMBL;Acc:A0A5K4FDS2]	schistosoma_mansoni_prjea36577	Anoctamin [Source:UniProtKB/TrEMBL;Acc:A0A5K4FDS2]			SM_V10_6
0.526	0.0521103	0.052	0.0751792	0.079	0.027	Muscle 1	Smp_164380	Putative camp-dependent protein kinase catalytic subunit	Source:UniProtKB/TrEMBL;Acc:G4VLY7]	schistosoma_mansoni_prjea36577	Putative camp-dependent protein kinase catalytic subunit [Source:UniProtKB/TrEMBL;Acc:G4VLY7]			SM_V10_6
0.526	0.0554087	0.052	0.0799378	0.068	0.016	Muscle 1	Smp_064430	Protein quiver	Source:UniProtKB/TrEMBL;Acc:G4VKC4]	schistosoma_mansoni_prjea36577	Protein quiver [Source:UniProtKB/TrEMBL;Acc:G4VKC4]			SM_V10_5
0.526	0.0644377	0.052	0.0929639	0.214	0.163	Muscle 1	Smp_045710	Snf7-related	Source:UniProtKB/TrEMBL;Acc:G4VK88]	schistosoma_mansoni_prjea36577	Snf7-related [Source:UniProtKB/TrEMBL;Acc:G4VK88]			SM_V10_5
0.526	0.0524949	0.052	0.0757342	0.085	0.033	Muscle 1	Smp_247280	C2H2-type domain-containing protein	Source:UniProtKB/TrEMBL;Acc:A0A5K4F2R8]	schistosoma_mansoni_prjea36577	C2H2-type domain-containing protein [Source:UniProtKB/TrEMBL;Acc:A0A5K4F2R8]			SM_V10_4
0.526	0.0578277	0.052	0.0834278	0.083	0.03	Muscle 1	Smp_089220	Regulator of microtubule dynamics protein 1	Source:UniProtKB/TrEMBL;Acc:A0A3Q0KIZ5]	schistosoma_mansoni_prjea36577	Regulator of microtubule dynamics protein 1 [Source:UniProtKB/TrEMBL;Acc:A0A3Q0KIZ5]			SM_V10_4
0.526	0.0515813	0.052	0.074416	0.397	0.347	Muscle 1	Smp_326500	Dolichol-phosphate mannosyltransferase subunit 3	Source:UniProtKB/TrEMBL;Acc:A0A146MGE2]	schistosoma_mansoni_prjea36577	Dolichol-phosphate mannosyltransferase subunit 3 [Source:UniProtKB/TrEMBL;Acc:A0A146MGE2]			SM_V10_3
0.526	0.0610356	0.052	0.0880557	0.235	0.186	Muscle 1	Smp_004360	Coiled-coil domain-containing protein 124	Source:UniProtKB/TrEMBL;Acc:G4LXI6]	schistosoma_mansoni_prjea36577	Coiled-coil domain-containing protein 124 [Source:UniProtKB/TrEMBL;Acc:G4LXI6]			SM_V10_3
0.526	0.0555611	0.052	0.0801577	0.061	0.009	Muscle 1	Smp_128760	RGS domain-containing protein	Source:UniProtKB/TrEMBL;Acc:A0A3Q0KLE2]	schistosoma_mansoni_prjea36577	RGS domain-containing protein [Source:UniProtKB/TrEMBL;Acc:A0A3Q0KLE2]			SM_V10_2
0.526	0.0554942	0.052	0.0800611	0.114	0.063	Muscle 1	Smp_049270	Putative heat shock protein	Source:UniProtKB/TrEMBL;Acc:G4V8X9]	schistosoma_mansoni_prjea36577	Putative heat shock protein [Source:UniProtKB/TrEMBL;Acc:G4V8X9]			SM_V10_1
0.526	0.0615728	0.052	0.0888308	0.508	0.478	Muscle 1	Smp_147960	SmZF1	Source:UniProtKB/TrEMBL;Acc:A0A3Q0KPA0]	schistosoma_mansoni_prjea36577	SmZF1 [Source:UniProtKB/TrEMBL;Acc:A0A3Q0KPA0]			SM_V10_1
0.526	0.0701817	0.052	0.101251	0.557	0.518	Muscle 1	Smp_328650	BolA-like protein	Source:UniProtKB/TrEMBL;Acc:A0A5K4F8R5]	schistosoma_mansoni_prjea36577	BolA-like protein [Source:UniProtKB/TrEMBL;Acc:A0A5K4F8R5]			SM_V10_1
0.526	0.0552276	0.052	0.0796765	0.071	0.018	Muscle 1	Smp_140860	Innexin	Source:UniProtKB/TrEMBL;Acc:A0A3Q0KNG6]	schistosoma_mansoni_prjea36577	Innexin [Source:UniProtKB/TrEMBL;Acc:A0A3Q0KNG6]	inx	UniProtKB Gene Name	SM_V10_1
0.525	0.0600139	0.05	0.0865818	0.509	0.471	Muscle 1	Smp_306140	Mediator of RNA polymerase II transcription subunit 31	Source:UniProtKB/TrEMBL;Acc:A0A5K4F2T5]	schistosoma_mansoni_prjea36577	Mediator of RNA polymerase II transcription subunit 31 [Source:UniProtKB/TrEMBL;Acc:A0A5K4F2T5]			SM_V10_Z
0.525	0.0609115	0.05	0.0878767	0.105	0.055	Muscle 1	Smp_180180	Sil1, putative	Source:UniProtKB/TrEMBL;Acc:A0A3Q0KTW9]	schistosoma_mansoni_prjea36577	Sil1, putative [Source:UniProtKB/TrEMBL;Acc:A0A3Q0KTW9]			SM_V10_Z
0.525	0.0824033	0.05	0.118883	0.351	0.312	Muscle 1	Smp_022850	28S ribosomal protein S31, mitochondrial	Source:UniProtKB/TrEMBL;Acc:G4VQ06]	schistosoma_mansoni_prjea36577	28S ribosomal protein S31, mitochondrial [Source:UniProtKB/TrEMBL;Acc:G4VQ06]			SM_V10_Z
0.525	0.0514259	0.05	0.0741919	0.073	0.022	Muscle 1	Smp_134140	Phosphodiesterase	Source:UniProtKB/TrEMBL;Acc:A0A3Q0KMA3]	schistosoma_mansoni_prjea36577	Phosphodiesterase [Source:UniProtKB/TrEMBL;Acc:A0A3Q0KMA3]	PDE4A	UniProtKB Gene Name	SM_V10_Z
0.525	0.0537389	0.05	0.0775288	0.134	0.083	Muscle 1	Smp_196880	Putative development and differentiation-enhancing factor, ddef	Source:UniProtKB/TrEMBL;Acc:A0A5K4EYX1]	schistosoma_mansoni_prjea36577	Putative development and differentiation-enhancing factor, ddef [Source:UniProtKB/TrEMBL;Acc:A0A5K4EYX1]			SM_V10_7
0.525	0.052866	0.05	0.0762695	0.067	0.016	Muscle 1	Smp_169890	Ig-like domain-containing protein	Source:UniProtKB/TrEMBL;Acc:A0A3Q0KSM4]	schistosoma_mansoni_prjea36577	Ig-like domain-containing protein [Source:UniProtKB/TrEMBL;Acc:A0A3Q0KSM4]			SM_V10_6
0.525	0.0438258	0.05	0.0632273	0.488	0.441	Muscle 1	Smp_096760	Phosphoglycerate mutase	Source:UniProtKB/TrEMBL;Acc:G4VJD5]	schistosoma_mansoni_prjea36577	Phosphoglycerate mutase [Source:UniProtKB/TrEMBL;Acc:G4VJD5]			SM_V10_4
0.525	0.0613687	0.05	0.0885363	0.257	0.209	Muscle 1	Smp_066900	Innexin	Source:UniProtKB/TrEMBL;Acc:G4VIL2]	schistosoma_mansoni_prjea36577	Innexin [Source:UniProtKB/TrEMBL;Acc:G4VIL2]	inx	UniProtKB Gene Name	SM_V10_4
0.525	0.0275618	0.05	0.0397632	0.214	0.16	Muscle 1	Smp_100040	Small integral membrane protein 14	Source:UniProtKB/TrEMBL;Acc:G4VG69]	schistosoma_mansoni_prjea36577	Small integral membrane protein 14 [Source:UniProtKB/TrEMBL;Acc:G4VG69]			SM_V10_3
0.525	0.0401092	0.05	0.0578653	0.124	0.073	Muscle 1	Smp_139840	Putative kunitz-type protease inhibitor	Source:UniProtKB/TrEMBL;Acc:A0A3Q0KN03]	schistosoma_mansoni_prjea36577	Putative kunitz-type protease inhibitor [Source:UniProtKB/TrEMBL;Acc:A0A3Q0KN03]			SM_V10_2
0.525	0.0450163	0.05	0.0649448	0.071	0.02	Muscle 1	Smp_169090	MFS domain-containing protein	Source:UniProtKB/TrEMBL;Acc:A0A3Q0KSU8]	schistosoma_mansoni_prjea36577	MFS domain-containing protein [Source:UniProtKB/TrEMBL;Acc:A0A3Q0KSU8]			SM_V10_2
0.525	0.0490105	0.05	0.0707072	0.057	0.008	Muscle 1	Smp_123020	Run domain Beclin-1-interacting and cysteine-rich domain-containing protein	Source:UniProtKB/TrEMBL;Acc:A0A3Q0KKI1]	schistosoma_mansoni_prjea36577	Run domain Beclin-1-interacting and cysteine-rich domain-containing protein [Source:UniProtKB/TrEMBL;Acc:A0A3Q0KKI1]			SM_V10_2
0.525	0.047202	0.05	0.0680981	0.145	0.093	Muscle 1	Smp_212390	Ubiquitin carboxyl-terminal hydrolase	Source:UniProtKB/TrEMBL;Acc:A0A3Q0KVI9]	schistosoma_mansoni_prjea36577	Ubiquitin carboxyl-terminal hydrolase [Source:UniProtKB/TrEMBL;Acc:A0A3Q0KVI9]			SM_V10_1
0.525	0.0546561	0.05	0.0788521	0.069	0.018	Muscle 1	Smp_163500	SH2 domain-containing protein	Source:UniProtKB/TrEMBL;Acc:A0A3Q0KRR8]	schistosoma_mansoni_prjea36577	SH2 domain-containing protein [Source:UniProtKB/TrEMBL;Acc:A0A3Q0KRR8]			SM_V10_1
0.525	0.0638979	0.05	0.0921852	0.321	0.282	Muscle 1	Smp_161960	Replication stress response regulator SDE2	Source:UniProtKB/TrEMBL;Acc:G4V783]	schistosoma_mansoni_prjea36577	Replication stress response regulator SDE2 [Source:UniProtKB/TrEMBL;Acc:G4V783]			SM_V10_1
0.525	0.0439873	0.05	0.0634603	0.158	0.106	Muscle 1	Smp_099150	PH domain-containing protein	Source:UniProtKB/TrEMBL;Acc:A0A3Q0KJQ1]	schistosoma_mansoni_prjea36577	PH domain-containing protein [Source:UniProtKB/TrEMBL;Acc:A0A3Q0KJQ1]			SM_V10_1
0.524	0.0481168	0.048	0.0694179	0.095	0.047	Muscle 1	Smp_266820	Fibronectin type-III domain-containing protein	Source:UniProtKB/TrEMBL;Acc:A0A5K4F349]	schistosoma_mansoni_prjea36577	Fibronectin type-III domain-containing protein [Source:UniProtKB/TrEMBL;Acc:A0A5K4F349]			SM_V10_Z
0.524	0.0453566	0.048	0.0654357	0.096	0.047	Muscle 1	Smp_305740	Putative nachr subunit	Source:UniProtKB/TrEMBL;Acc:A0A5K4F4B2]	schistosoma_mansoni_prjea36577	Putative nachr subunit [Source:UniProtKB/TrEMBL;Acc:A0A5K4F4B2]			SM_V10_Z
0.524	0.0477861	0.048	0.0689408	0.071	0.024	Muscle 1	Smp_244940	Serine/threonine-protein kinase LATS1	Source:UniProtKB/TrEMBL;Acc:A0A5K4F0B9]	schistosoma_mansoni_prjea36577	Serine/threonine-protein kinase LATS1 [Source:UniProtKB/TrEMBL;Acc:A0A5K4F0B9]			SM_V10_Z
0.524	0.046814	0.048	0.0675383	0.065	0.018	Muscle 1	Smp_244960	Dehydrogenase/reductase SDR family member 1	Source:UniProtKB/TrEMBL;Acc:A0A5K4F1W9]	schistosoma_mansoni_prjea36577	Dehydrogenase/reductase SDR family member 1 [Source:UniProtKB/TrEMBL;Acc:A0A5K4F1W9]			SM_V10_Z
0.524	0.0518867	0.048	0.0748567	0.067	0.019	Muscle 1	Smp_125940	Secreted protein	Source:UniProtKB/TrEMBL;Acc:A0A3Q0KKZ6]	schistosoma_mansoni_prjea36577	Secreted protein [Source:UniProtKB/TrEMBL;Acc:A0A3Q0KKZ6]			SM_V10_Z
0.524	0.00464249	0.048	0.00669769	0.133	0.082	Muscle 1	Smp_332360	Erythrocyte membrane protein, putative	Source:UniProtKB/TrEMBL;Acc:A0A5K4F7L8]	schistosoma_mansoni_prjea36577	Erythrocyte membrane protein, putative [Source:UniProtKB/TrEMBL;Acc:A0A5K4F7L8]			SM_V10_7
0.524	0.0517014	0.048	0.0745893	0.083	0.035	Muscle 1	Smp_350270	Smp_350270	Smp_350270~	schistosoma_mansoni_prjea36577				SM_V10_7
0.524	0.0467636	0.048	0.0674656	0.086	0.038	Muscle 1	Smp_214000	Serine/threonine-protein phosphatase	Source:UniProtKB/TrEMBL;Acc:A0A5K4F2J7]	schistosoma_mansoni_prjea36577	Serine/threonine-protein phosphatase [Source:UniProtKB/TrEMBL;Acc:A0A5K4F2J7]			SM_V10_6
0.524	0.0216564	0.048	0.0312436	0.897	0.862	Muscle 1	Smp_066590	LYR motif-containing protein 4	Source:UniProtKB/TrEMBL;Acc:A0A5K4EFC2]	schistosoma_mansoni_prjea36577	LYR motif-containing protein 4 [Source:UniProtKB/TrEMBL;Acc:A0A5K4EFC2]			SM_V10_6
0.524	0.0592634	0.048	0.085499	0.277	0.233	Muscle 1	Smp_064320	26S proteasome subunit P28-related	Source:UniProtKB/TrEMBL;Acc:G4VKD5]	schistosoma_mansoni_prjea36577	26S proteasome subunit P28-related [Source:UniProtKB/TrEMBL;Acc:G4VKD5]			SM_V10_5
0.524	0.0533755	0.048	0.0770046	0.052	0.003	Muscle 1	Smp_336750	G_PROTEIN_RECEP_F1_2 domain-containing protein	Source:UniProtKB/TrEMBL;Acc:A0A5K4FDA2]	schistosoma_mansoni_prjea36577	G_PROTEIN_RECEP_F1_2 domain-containing protein [Source:UniProtKB/TrEMBL;Acc:A0A5K4FDA2]			SM_V10_4
0.524	0.0563634	0.048	0.0813153	0.057	0.01	Muscle 1	Smp_145140	Protein Wnt	Source:UniProtKB/TrEMBL;Acc:G4VJE5]	schistosoma_mansoni_prjea36577	Protein Wnt [Source:UniProtKB/TrEMBL;Acc:G4VJE5]			SM_V10_4
0.524	0.0442792	0.048	0.0638814	0.082	0.034	Muscle 1	Smp_043030	Hexokinase	Source:UniProtKB/Swiss-Prot;Acc:Q26609]	schistosoma_mansoni_prjea36577	Hexokinase [Source:UniProtKB/Swiss-Prot;Acc:Q26609]			SM_V10_4
0.524	0.0426453	0.048	0.0615241	0.083	0.034	Muscle 1	Smp_105220	DIF_5	Source:UniProtKB/TrEMBL;Acc:B8Y6H3]	schistosoma_mansoni_prjea36577	DIF_5 [Source:UniProtKB/TrEMBL;Acc:B8Y6H3]			SM_V10_1
0.524	0.0438279	0.048	0.0632302	0.164	0.116	Muscle 1	Smp_246620	Protein kinase domain-containing protein	Source:UniProtKB/TrEMBL;Acc:A0A5K4F0V9]	schistosoma_mansoni_prjea36577	Protein kinase domain-containing protein [Source:UniProtKB/TrEMBL;Acc:A0A5K4F0V9]			SM_V10_1
0.524	0.0502558	0.048	0.0725038	0.122	0.074	Muscle 1	Smp_094880	1,4-alpha-glucan branching enzyme	Source:UniProtKB/TrEMBL;Acc:A0A5K4EIP0]	schistosoma_mansoni_prjea36577	1,4-alpha-glucan branching enzyme [Source:UniProtKB/TrEMBL;Acc:A0A5K4EIP0]			SM_V10_1
0.524	0.0568648	0.048	0.0820386	0.181	0.133	Muscle 1	Smp_034870	AP complex subunit beta	Source:UniProtKB/TrEMBL;Acc:A0A3Q0KED0]	schistosoma_mansoni_prjea36577	AP complex subunit beta [Source:UniProtKB/TrEMBL;Acc:A0A3Q0KED0]			SM_V10_1
0.524	0.0453511	0.048	0.0654278	0.278	0.229	Muscle 1	Smp_035270	Malate dehydrogenase	Source:UniProtKB/TrEMBL;Acc:G4V7Z7]	schistosoma_mansoni_prjea36577	Malate dehydrogenase [Source:UniProtKB/TrEMBL;Acc:G4V7Z7]			SM_V10_1
0.524	0.0523796	0.048	0.0755677	0.27	0.222	Muscle 1	Smp_103160	FAA4 Long-chain-fatty-acid--CoA ligase 4	Source:UniProtKB/TrEMBL;Acc:A0A3Q0KJU6]	schistosoma_mansoni_prjea36577	FAA4 Long-chain-fatty-acid--CoA ligase 4 [Source:UniProtKB/TrEMBL;Acc:A0A3Q0KJU6]			SM_V10_1
0.524	0.0224548	0.048	0.0323954	0.49	0.44	Muscle 1	Smp_053390	Histone H4	Source:UniProtKB/TrEMBL;Acc:C4QBN1]	schistosoma_mansoni_prjea36577	Histone H4 [Source:UniProtKB/TrEMBL;Acc:C4QBN1]			SM_V10_1
0.524	0.0358316	0.048	0.0516941	0.063	0.015	Muscle 1	Smp_179970	Smp_179970	Smp_179970~	schistosoma_mansoni_prjea36577				SM_V10_1
0.523	0.0659125	0.046	0.0950917	0.182	0.139	Muscle 1	Smp_149540	Protein Dr1	Source:UniProtKB/TrEMBL;Acc:A0A3Q0KPP2]	schistosoma_mansoni_prjea36577	Protein Dr1 [Source:UniProtKB/TrEMBL;Acc:A0A3Q0KPP2]			SM_V10_Z
0.523	0.0465328	0.046	0.0671326	0.078	0.032	Muscle 1	Smp_266840	PHB domain-containing protein	Source:UniProtKB/TrEMBL;Acc:A0A5K4F2T0]	schistosoma_mansoni_prjea36577	PHB domain-containing protein [Source:UniProtKB/TrEMBL;Acc:A0A5K4F2T0]			SM_V10_Z
0.523	0.0477371	0.046	0.0688701	0.048	0.003	Muscle 1	Smp_203950	Retinol dehydrogenase 12	Source:UniProtKB/TrEMBL;Acc:A0A3Q0KVF6]	schistosoma_mansoni_prjea36577	Retinol dehydrogenase 12 [Source:UniProtKB/TrEMBL;Acc:A0A3Q0KVF6]			SM_V10_Z
0.523	0.0738195	0.046	0.106499	0.445	0.425	Muscle 1	Smp_017830	NADH dehydrogenase	ubiquinone] iron-sulfur protein 5	schistosoma_mansoni_prjea36577	NADH dehydrogenase [ubiquinone] iron-sulfur protein 5 [Source:UniProtKB/TrEMBL;Acc:G4VNQ8]			SM_V10_Z
0.523	0.0536073	0.046	0.077339	0.083	0.038	Muscle 1	Smp_093930	receptor protein-tyrosine kinase	Source:UniProtKB/TrEMBL;Acc:A0A3Q0KJB6]	schistosoma_mansoni_prjea36577	receptor protein-tyrosine kinase [Source:UniProtKB/TrEMBL;Acc:A0A3Q0KJB6]	SER	UniProtKB Gene Name	SM_V10_Z
0.523	0.0496394	0.046	0.0716145	0.063	0.016	Muscle 1	Smp_322480	Ovule protein	Source:UniProtKB/TrEMBL;Acc:A0A5K4F987]	schistosoma_mansoni_prjea36577	Ovule protein [Source:UniProtKB/TrEMBL;Acc:A0A5K4F987]			SM_V10_Z
0.523	0.0539919	0.046	0.0778939	0.154	0.108	Muscle 1	Smp_127810	Ig-like domain-containing protein	Source:UniProtKB/TrEMBL;Acc:A0A5K4ELZ0]	schistosoma_mansoni_prjea36577	Ig-like domain-containing protein [Source:UniProtKB/TrEMBL;Acc:A0A5K4ELZ0]			SM_V10_7
0.523	0.0470445	0.046	0.0678708	0.209	0.163	Muscle 1	Smp_347160	Signal peptide peptidase	Source:UniProtKB/TrEMBL;Acc:A0A5K4FCU6]	schistosoma_mansoni_prjea36577	Signal peptide peptidase [Source:UniProtKB/TrEMBL;Acc:A0A5K4FCU6]			SM_V10_6
0.523	0.0425294	0.046	0.061357	0.099	0.052	Muscle 1	Smp_210130	Homeobox protein six-related	Source:UniProtKB/TrEMBL;Acc:A0A5K4F027]	schistosoma_mansoni_prjea36577	Homeobox protein six-related [Source:UniProtKB/TrEMBL;Acc:A0A5K4F027]			SM_V10_5
0.523	0.0687594	0.046	0.0991988	0.579	0.576	Muscle 1	Smp_068000	Ubiquitin conjugating enzyme E2, putative	Source:UniProtKB/TrEMBL;Acc:G4LZZ9]	schistosoma_mansoni_prjea36577	Ubiquitin conjugating enzyme E2, putative [Source:UniProtKB/TrEMBL;Acc:G4LZZ9]			SM_V10_5
0.523	0.04805	0.046	0.0693216	0.09	0.043	Muscle 1	Smp_151010	Putative monocarboxylate transporter	Source:UniProtKB/TrEMBL;Acc:A0A3Q0KPW5]	schistosoma_mansoni_prjea36577	Putative monocarboxylate transporter [Source:UniProtKB/TrEMBL;Acc:A0A3Q0KPW5]			SM_V10_4
0.523	0.0461673	0.046	0.0666053	0.07	0.025	Muscle 1	Smp_212720	VOC domain-containing protein	Source:UniProtKB/TrEMBL;Acc:A0A3Q0KVF4]	schistosoma_mansoni_prjea36577	VOC domain-containing protein [Source:UniProtKB/TrEMBL;Acc:A0A3Q0KVF4]			SM_V10_3
0.523	0.0470995	0.046	0.0679502	0.103	0.056	Muscle 1	Smp_075130	Putative guanine nucleotide-binding protein beta 5 (G protein beta5)	Source:UniProtKB/TrEMBL;Acc:G4VGZ9]	schistosoma_mansoni_prjea36577	Putative guanine nucleotide-binding protein beta 5 (G protein beta5) [Source:UniProtKB/TrEMBL;Acc:G4VGZ9]			SM_V10_3
0.523	0.0506058	0.046	0.0730087	0.048	0.003	Muscle 1	Smp_175510	Ig-like domain-containing protein	Source:UniProtKB/TrEMBL;Acc:A0A3Q0KTG1]	schistosoma_mansoni_prjea36577	Ig-like domain-containing protein [Source:UniProtKB/TrEMBL;Acc:A0A3Q0KTG1]			SM_V10_3
0.523	0.0417513	0.046	0.0602344	0.095	0.048	Muscle 1	Smp_205760	Guanine nucleotide-binding protein subunit gamma; Trimeric G-protein gamma subunit; Trimeric G-protein gamma subunit	Source:UniProtKB/TrEMBL;Acc:Q8IT61]	schistosoma_mansoni_prjea36577	Guanine nucleotide-binding protein subunit gamma; Trimeric G-protein gamma subunit; Trimeric G-protein gamma subunit [Source:UniProtKB/TrEMBL;Acc:Q8IT61]			SM_V10_3
0.523	0.0695369	0.046	0.10032	0.678	0.69	Muscle 1	Smp_002410	14-3-3 epsilon 2	Source:UniProtKB/TrEMBL;Acc:Q95W36]	schistosoma_mansoni_prjea36577	14-3-3 epsilon 2 [Source:UniProtKB/TrEMBL;Acc:Q95W36]			SM_V10_2
0.523	0.0495111	0.046	0.0714294	0.055	0.01	Muscle 1	Smp_122980	Kelch-like protein	Source:UniProtKB/TrEMBL;Acc:A0A3Q0KKI0]	schistosoma_mansoni_prjea36577	Kelch-like protein [Source:UniProtKB/TrEMBL;Acc:A0A3Q0KKI0]			SM_V10_2
0.523	0.0487443	0.046	0.0703231	0.048	0.003	Muscle 1	Smp_161210	G_PROTEIN_RECEP_F1_2 domain-containing protein	Source:UniProtKB/TrEMBL;Acc:A0A3Q0KRE3]	schistosoma_mansoni_prjea36577	G_PROTEIN_RECEP_F1_2 domain-containing protein [Source:UniProtKB/TrEMBL;Acc:A0A3Q0KRE3]			SM_V10_2
0.523	0.0490034	0.046	0.0706969	0.112	0.067	Muscle 1	Smp_147980	Putative zinc finger protein	Source:UniProtKB/TrEMBL;Acc:A0A3Q0KPF6]	schistosoma_mansoni_prjea36577	Putative zinc finger protein [Source:UniProtKB/TrEMBL;Acc:A0A3Q0KPF6]			SM_V10_1
0.523	0.0439785	0.046	0.0634476	0.05	0.004	Muscle 1	Smp_176410	F-box domain-containing protein	Source:UniProtKB/TrEMBL;Acc:A0A3Q0KTL2]	schistosoma_mansoni_prjea36577	F-box domain-containing protein [Source:UniProtKB/TrEMBL;Acc:A0A3Q0KTL2]			SM_V10_1
0.523	0.0480148	0.046	0.0692707	0.066	0.021	Muscle 1	Smp_072990	Putative seven transmembrane receptor	Source:UniProtKB/TrEMBL;Acc:A0A3Q0KHM5]	schistosoma_mansoni_prjea36577	Putative seven transmembrane receptor [Source:UniProtKB/TrEMBL;Acc:A0A3Q0KHM5]			SM_V10_1
0.523	0.0423798	0.046	0.0611411	0.099	0.053	Muscle 1	Smp_196790	Peptide-methionine (R)-S-oxide reductase	Source:UniProtKB/TrEMBL;Acc:A0A3Q0KUW1]	schistosoma_mansoni_prjea36577	Peptide-methionine (R)-S-oxide reductase [Source:UniProtKB/TrEMBL;Acc:A0A3Q0KUW1]			SM_V10_1
0.523	0.0417984	0.046	0.0603023	0.159	0.112	Muscle 1	Smp_337440	SET domain-containing protein	Source:UniProtKB/TrEMBL;Acc:A0A5K4F966]	schistosoma_mansoni_prjea36577	SET domain-containing protein [Source:UniProtKB/TrEMBL;Acc:A0A5K4F966]			SM_V10_1
0.522	0.0459991	0.044	0.0663627	0.133	0.09	Muscle 1	Smp_075640	Putative ammecr1 homolog	Source:UniProtKB/TrEMBL;Acc:G4VT80]	schistosoma_mansoni_prjea36577	Putative ammecr1 homolog [Source:UniProtKB/TrEMBL;Acc:G4VT80]			SM_V10_Z
0.522	0.0451159	0.044	0.0650885	0.118	0.073	Muscle 1	Smp_090240	Putative jnk/sapk-associated protein	Source:UniProtKB/TrEMBL;Acc:A0A3Q0KIX9]	schistosoma_mansoni_prjea36577	Putative jnk/sapk-associated protein [Source:UniProtKB/TrEMBL;Acc:A0A3Q0KIX9]			SM_V10_Z
0.522	0.0617159	0.044	0.0890373	0.349	0.315	Muscle 1	Smp_046100	NADH dehydrogenase	ubiquinone] 1 beta subcomplex subunit 4	schistosoma_mansoni_prjea36577	NADH dehydrogenase [ubiquinone] 1 beta subcomplex subunit 4 [Source:UniProtKB/TrEMBL;Acc:G4VPS8]			SM_V10_Z
0.522	0.0474256	0.044	0.0684208	0.057	0.012	Muscle 1	Smp_157100	Sphingoid long chain base kinase	Source:UniProtKB/TrEMBL;Acc:A0A5K4ETP2]	schistosoma_mansoni_prjea36577	Sphingoid long chain base kinase [Source:UniProtKB/TrEMBL;Acc:A0A5K4ETP2]			SM_V10_Z
0.522	0.0447886	0.044	0.0646162	0.08	0.036	Muscle 1	Smp_153690	Ubiquitin-specific peptidase 9X (C19 family)	Source:UniProtKB/TrEMBL;Acc:A0A3Q0KQ99]	schistosoma_mansoni_prjea36577	Ubiquitin-specific peptidase 9X (C19 family) [Source:UniProtKB/TrEMBL;Acc:A0A3Q0KQ99]			SM_V10_Z
0.522	0.0625544	0.044	0.0902469	0.29	0.252	Muscle 1	Smp_059870	p53 and DNA damage-regulated protein 1	Source:UniProtKB/TrEMBL;Acc:G4VT25]	schistosoma_mansoni_prjea36577	p53 and DNA damage-regulated protein 1 [Source:UniProtKB/TrEMBL;Acc:G4VT25]			SM_V10_Z
0.522	0.068916	0.044	0.0994248	0.2	0.16	Muscle 1	Smp_207000	Anamorsin homolog	Source:UniProtKB/Swiss-Prot;Acc:C4PYP8]	schistosoma_mansoni_prjea36577	Anamorsin homolog [Source:UniProtKB/Swiss-Prot;Acc:C4PYP8]			SM_V10_Z
0.522	0.0469364	0.044	0.067715	0.047	0.003	Muscle 1	Smp_347690	Neuron navigator 2	Source:UniProtKB/TrEMBL;Acc:A0A5K4FD12]	schistosoma_mansoni_prjea36577	Neuron navigator 2 [Source:UniProtKB/TrEMBL;Acc:A0A5K4FD12]			SM_V10_Z
0.522	0.0412789	0.044	0.0595529	0.093	0.049	Muscle 1	Smp_343720	Tyrosine-protein phosphatase non-receptor type 9	Source:UniProtKB/TrEMBL;Acc:A0A5K4FBG7]	schistosoma_mansoni_prjea36577	Tyrosine-protein phosphatase non-receptor type 9 [Source:UniProtKB/TrEMBL;Acc:A0A5K4FBG7]			SM_V10_7
0.522	0.0618209	0.044	0.0891887	0.046	0.002	Muscle 1	Smp_248090	Protein Wnt	Source:UniProtKB/TrEMBL;Acc:A0A5K4F191]	schistosoma_mansoni_prjea36577	Protein Wnt [Source:UniProtKB/TrEMBL;Acc:A0A5K4F191]			SM_V10_7
0.522	0.0455727	0.044	0.0657475	0.071	0.026	Muscle 1	Smp_332270	Par3_HAL_N_term domain-containing protein	Source:UniProtKB/TrEMBL;Acc:A0A5K4F7K8]	schistosoma_mansoni_prjea36577	Par3_HAL_N_term domain-containing protein [Source:UniProtKB/TrEMBL;Acc:A0A5K4F7K8]			SM_V10_7
0.522	0.0471721	0.044	0.068055	0.052	0.007	Muscle 1	Smp_163950	CST complex subunit CTC1	Source:UniProtKB/TrEMBL;Acc:A0A3Q0KRT0]	schistosoma_mansoni_prjea36577	CST complex subunit CTC1 [Source:UniProtKB/TrEMBL;Acc:A0A3Q0KRT0]			SM_V10_6
0.522	0.044295	0.044	0.0639042	0.071	0.026	Muscle 1	Smp_156850	Smp_156850	Smp_156850~	schistosoma_mansoni_prjea36577				SM_V10_5
0.522	0.0495961	0.044	0.0715521	0.209	0.167	Muscle 1	Smp_003710	Putative tropomodulin	Source:UniProtKB/TrEMBL;Acc:G4VJX4]	schistosoma_mansoni_prjea36577	Putative tropomodulin [Source:UniProtKB/TrEMBL;Acc:G4VJX4]			SM_V10_5
0.522	0.0477716	0.044	0.0689199	0.116	0.074	Muscle 1	Smp_035730	Putative fgf receptor activating protein	Source:UniProtKB/TrEMBL;Acc:G4VHK6]	schistosoma_mansoni_prjea36577	Putative fgf receptor activating protein [Source:UniProtKB/TrEMBL;Acc:G4VHK6]			SM_V10_4
0.522	0.0541361	0.044	0.0781018	0.157	0.114	Muscle 1	Smp_347140	4-hydroxybenzoate polyprenyltransferase, mitochondrial	Source:UniProtKB/TrEMBL;Acc:A0A5K4FFI7]	schistosoma_mansoni_prjea36577	4-hydroxybenzoate polyprenyltransferase, mitochondrial [Source:UniProtKB/TrEMBL;Acc:A0A5K4FFI7]			SM_V10_4
0.522	0.0466574	0.044	0.0673124	0.044	0.001	Muscle 1	Smp_334050	Cadherin	Source:UniProtKB/TrEMBL;Acc:A0A5K4FAB7]	schistosoma_mansoni_prjea36577	Cadherin [Source:UniProtKB/TrEMBL;Acc:A0A5K4FAB7]			SM_V10_4
0.522	0.0442335	0.044	0.0638154	0.102	0.058	Muscle 1	Smp_078750	Putative transmembrane 4 superfamily member	Source:UniProtKB/TrEMBL;Acc:G4VFD9]	schistosoma_mansoni_prjea36577	Putative transmembrane 4 superfamily member [Source:UniProtKB/TrEMBL;Acc:G4VFD9]			SM_V10_3
0.522	0.0462359	0.044	0.0667042	0.07	0.025	Muscle 1	Smp_002920	TLC domain-containing protein	Source:UniProtKB/TrEMBL;Acc:G4VLI4]	schistosoma_mansoni_prjea36577	TLC domain-containing protein [Source:UniProtKB/TrEMBL;Acc:G4VLI4]			SM_V10_3
0.522	0.0479809	0.044	0.0692218	0.18	0.137	Muscle 1	Smp_002510	Pyruvate dehydrogenase E1 component subunit beta	Source:UniProtKB/TrEMBL;Acc:A0A3Q0KBK2]	schistosoma_mansoni_prjea36577	Pyruvate dehydrogenase E1 component subunit beta [Source:UniProtKB/TrEMBL;Acc:A0A3Q0KBK2]			SM_V10_3
0.522	0.0488036	0.044	0.0704088	0.082	0.038	Muscle 1	Smp_148410	HEAT repeat-containing protein 5B	Source:UniProtKB/TrEMBL;Acc:A0A3Q0KPG9]	schistosoma_mansoni_prjea36577	HEAT repeat-containing protein 5B [Source:UniProtKB/TrEMBL;Acc:A0A3Q0KPG9]			SM_V10_2
0.522	0.049087	0.044	0.0708176	0.059	0.015	Muscle 1	Smp_341030	C2H2-type domain-containing protein	Source:UniProtKB/TrEMBL;Acc:A0A5K4FE89]	schistosoma_mansoni_prjea36577	C2H2-type domain-containing protein [Source:UniProtKB/TrEMBL;Acc:A0A5K4FE89]			SM_V10_2
0.522	0.0241575	0.044	0.034852	0.202	0.155	Muscle 1	Smp_021220	Ig-like domain-containing protein	Source:UniProtKB/TrEMBL;Acc:A0A3Q0KD67]	schistosoma_mansoni_prjea36577	Ig-like domain-containing protein [Source:UniProtKB/TrEMBL;Acc:A0A3Q0KD67]			SM_V10_2
0.522	0.0465784	0.044	0.0671984	0.132	0.087	Muscle 1	Smp_340540	Scavenger receptor class B member 2	Source:UniProtKB/TrEMBL;Acc:A0A5K4FAA7]	schistosoma_mansoni_prjea36577	Scavenger receptor class B member 2 [Source:UniProtKB/TrEMBL;Acc:A0A5K4FAA7]			SM_V10_1
0.522	0.0446527	0.044	0.0644202	0.05	0.007	Muscle 1	Smp_143300	Notch	Source:UniProtKB/TrEMBL;Acc:A0A3Q0KNN4]	schistosoma_mansoni_prjea36577	Notch [Source:UniProtKB/TrEMBL;Acc:A0A3Q0KNN4]			SM_V10_1
0.522	0.0552032	0.044	0.0796414	0.263	0.224	Muscle 1	Smp_068340	RUN domain-containing protein	Source:UniProtKB/TrEMBL;Acc:G4VAF2]	schistosoma_mansoni_prjea36577	RUN domain-containing protein [Source:UniProtKB/TrEMBL;Acc:G4VAF2]			SM_V10_1
0.522	0.044329	0.044	0.0639533	0.079	0.035	Muscle 1	Smp_181150	Putative abc transporter	Source:UniProtKB/TrEMBL;Acc:A0A3Q0KTW0]	schistosoma_mansoni_prjea36577	Putative abc transporter [Source:UniProtKB/TrEMBL;Acc:A0A3Q0KTW0]			SM_V10_1
0.522	0.0476384	0.044	0.0687277	0.087	0.042	Muscle 1	Smp_172070	Putative immunoglobulin domain superfamily (Sensory guidance protein)	Source:UniProtKB/TrEMBL;Acc:A0A3Q0KT09]	schistosoma_mansoni_prjea36577	Putative immunoglobulin domain superfamily (Sensory guidance protein) [Source:UniProtKB/TrEMBL;Acc:A0A3Q0KT09]			SM_V10_1
0.522	0.0526774	0.044	0.0759975	0.116	0.072	Muscle 1	Smp_319100	PPM-type phosphatase domain-containing protein	Source:UniProtKB/TrEMBL;Acc:A0A146MHP7]	schistosoma_mansoni_prjea36577	PPM-type phosphatase domain-containing protein [Source:UniProtKB/TrEMBL;Acc:A0A146MHP7]			SM_V10_1
0.522	0.0441882	0.044	0.0637501	0.093	0.049	Muscle 1	Smp_033970	Putative flotillin-2	Source:UniProtKB/TrEMBL;Acc:A0A3Q0KEA0]	schistosoma_mansoni_prjea36577	Putative flotillin-2 [Source:UniProtKB/TrEMBL;Acc:A0A3Q0KEA0]			SM_V10_1
0.522	0.0505726	0.044	0.0729609	0.32	0.28	Muscle 1	Smp_003700	30S ribosomal protein S18	Source:UniProtKB/TrEMBL;Acc:G4V6L4]	schistosoma_mansoni_prjea36577	30S ribosomal protein S18 [Source:UniProtKB/TrEMBL;Acc:G4V6L4]			SM_V10_1
0.521	0.044475	0.042	0.0641639	0.099	0.056	Muscle 1	Smp_163790	Putative nuclear hormone receptor	Source:UniProtKB/TrEMBL;Acc:A0A3Q0KRM6]	schistosoma_mansoni_prjea36577	Putative nuclear hormone receptor [Source:UniProtKB/TrEMBL;Acc:A0A3Q0KRM6]	2DBD-beta	UniProtKB Gene Name	SM_V10_Z
0.521	0.0386623	0.042	0.0557779	0.068	0.027	Muscle 1	Smp_173760	C2H2-type domain-containing protein	Source:UniProtKB/TrEMBL;Acc:A0A3Q0KTL0]	schistosoma_mansoni_prjea36577	C2H2-type domain-containing protein [Source:UniProtKB/TrEMBL;Acc:A0A3Q0KTL0]			SM_V10_Z
0.521	0.0508616	0.042	0.0733777	0.114	0.073	Muscle 1	Smp_133310	Smp_133310	Smp_133310~	schistosoma_mansoni_prjea36577				SM_V10_Z
0.521	0.0465785	0.042	0.0671986	0.189	0.147	Muscle 1	Smp_068220	Putative bhlhzip transcription factor max/bigmax	Source:UniProtKB/TrEMBL;Acc:A0A3Q0KH90]	schistosoma_mansoni_prjea36577	Putative bhlhzip transcription factor max/bigmax [Source:UniProtKB/TrEMBL;Acc:A0A3Q0KH90]			SM_V10_Z
0.521	0.0510392	0.042	0.073634	0.522	0.485	Muscle 1	Smp_028410	Protein kish	Source:UniProtKB/TrEMBL;Acc:G4LWZ9]	schistosoma_mansoni_prjea36577	Protein kish [Source:UniProtKB/TrEMBL;Acc:G4LWZ9]			SM_V10_Z
0.521	0.0346835	0.042	0.0500377	0.165	0.121	Muscle 1	Smp_170550	Putative granulin	Source:UniProtKB/TrEMBL;Acc:A0A3Q0KSR3]	schistosoma_mansoni_prjea36577	Putative granulin [Source:UniProtKB/TrEMBL;Acc:A0A3Q0KSR3]			SM_V10_7
0.521	0.0568441	0.042	0.0820087	0.207	0.168	Muscle 1	Smp_006060	DUF4773 domain-containing protein	Source:UniProtKB/TrEMBL;Acc:G4V6V0]	schistosoma_mansoni_prjea36577	DUF4773 domain-containing protein [Source:UniProtKB/TrEMBL;Acc:G4V6V0]			SM_V10_7
0.521	0.0450153	0.042	0.0649433	0.047	0.004	Muscle 1	Smp_147070	Putative amino acid transporter	Source:UniProtKB/TrEMBL;Acc:A0A3Q0KP94]	schistosoma_mansoni_prjea36577	Putative amino acid transporter [Source:UniProtKB/TrEMBL;Acc:A0A3Q0KP94]			SM_V10_6
0.521	0.0419554	0.042	0.0605288	0.118	0.075	Muscle 1	Smp_012010	Forkhead transcription factor	Source:UniProtKB/TrEMBL;Acc:A6XDL3]	schistosoma_mansoni_prjea36577	Forkhead transcription factor [Source:UniProtKB/TrEMBL;Acc:A6XDL3]	FoxO	UniProtKB Gene Name	SM_V10_6
0.521	0.0546848	0.042	0.0788935	0.154	0.113	Muscle 1	Smp_053060	F-box domain-containing protein	Source:UniProtKB/TrEMBL;Acc:G4VK12]	schistosoma_mansoni_prjea36577	F-box domain-containing protein [Source:UniProtKB/TrEMBL;Acc:G4VK12]			SM_V10_5
0.521	0.0408703	0.042	0.0589635	0.18	0.138	Muscle 1	Smp_125640	Syntaxin-12, putative	Source:UniProtKB/TrEMBL;Acc:G4LZ54]	schistosoma_mansoni_prjea36577	Syntaxin-12, putative [Source:UniProtKB/TrEMBL;Acc:G4LZ54]			SM_V10_5
0.521	0.0391574	0.042	0.0564922	0.126	0.083	Muscle 1	Smp_043220	BCL2/adenovirus E1B 19 kDa protein-interacting protein 3-like	Source:UniProtKB/TrEMBL;Acc:G4VIX8]	schistosoma_mansoni_prjea36577	BCL2/adenovirus E1B 19 kDa protein-interacting protein 3-like [Source:UniProtKB/TrEMBL;Acc:G4VIX8]			SM_V10_4
0.521	0.0509158	0.042	0.073456	0.054	0.011	Muscle 1	Smp_008850	Putative peptide (FMRFamide/somatostatin)-like receptor	Source:UniProtKB/TrEMBL;Acc:G4VIE4]	schistosoma_mansoni_prjea36577	Putative peptide (FMRFamide/somatostatin)-like receptor [Source:UniProtKB/TrEMBL;Acc:G4VIE4]			SM_V10_4
0.521	0.0476787	0.042	0.0687858	0.088	0.045	Muscle 1	Smp_000870	FYVE, RhoGEF and PH domain-containing protein 4	Source:UniProtKB/TrEMBL;Acc:A0A5K4E8F1]	schistosoma_mansoni_prjea36577	FYVE, RhoGEF and PH domain-containing protein 4 [Source:UniProtKB/TrEMBL;Acc:A0A5K4E8F1]			SM_V10_3
0.521	0.0456661	0.042	0.0658822	0.135	0.091	Muscle 1	Smp_333620	BHLH domain-containing protein	Source:UniProtKB/TrEMBL;Acc:A0A5K4F822]	schistosoma_mansoni_prjea36577	BHLH domain-containing protein [Source:UniProtKB/TrEMBL;Acc:A0A5K4F822]			SM_V10_3
0.521	0.0489957	0.042	0.0706858	0.179	0.138	Muscle 1	Smp_044260	Apg10p-like protein	Source:UniProtKB/TrEMBL;Acc:A0A3Q0KF59]	schistosoma_mansoni_prjea36577	Apg10p-like protein [Source:UniProtKB/TrEMBL;Acc:A0A3Q0KF59]			SM_V10_3
0.521	0.0571727	0.042	0.0824828	0.152	0.112	Muscle 1	Smp_018430	Mitochondrial signal peptidase (S26 family)	Source:UniProtKB/TrEMBL;Acc:A0A5K4EAL6]	schistosoma_mansoni_prjea36577	Mitochondrial signal peptidase (S26 family) [Source:UniProtKB/TrEMBL;Acc:A0A5K4EAL6]			SM_V10_3
0.521	0.044382	0.042	0.0640297	0.08	0.039	Muscle 1	Smp_144600	Putative guanine-nucleotide-exchange-factor	Source:UniProtKB/TrEMBL;Acc:A0A3Q0KP30]	schistosoma_mansoni_prjea36577	Putative guanine-nucleotide-exchange-factor [Source:UniProtKB/TrEMBL;Acc:A0A3Q0KP30]			SM_V10_1
0.521	0.037888	0.042	0.0546608	0.084	0.041	Muscle 1	Smp_060480	Putative copine	Source:UniProtKB/TrEMBL;Acc:A0A3Q0KGJ6]	schistosoma_mansoni_prjea36577	Putative copine [Source:UniProtKB/TrEMBL;Acc:A0A3Q0KGJ6]			SM_V10_1
0.521	0.0333699	0.042	0.0481426	0.901	0.899	Muscle 1	Smp_004940	60S ribosomal protein L35	Source:UniProtKB/TrEMBL;Acc:G4V5M1]	schistosoma_mansoni_prjea36577	60S ribosomal protein L35 [Source:UniProtKB/TrEMBL;Acc:G4V5M1]			SM_V10_1
0.521	0.0383298	0.042	0.0552982	0.12	0.078	Muscle 1	Smp_071380	Putative zinc finger protein	Source:UniProtKB/TrEMBL;Acc:G4VFW7]	schistosoma_mansoni_prjea36577	Putative zinc finger protein [Source:UniProtKB/TrEMBL;Acc:G4VFW7]			SM_V10_1
0.521	0.0402142	0.042	0.0580168	0.067	0.025	Muscle 1	Smp_141070	Glutamate receptor-interacting protein 1	Source:UniProtKB/TrEMBL;Acc:A0A3Q0KNB3]	schistosoma_mansoni_prjea36577	Glutamate receptor-interacting protein 1 [Source:UniProtKB/TrEMBL;Acc:A0A3Q0KNB3]			SM_V10_1
0.521	0.0375669	0.042	0.0541975	0.301	0.261	Muscle 1	Smp_079310	Transmembrane protein tmp21-related	Source:UniProtKB/TrEMBL;Acc:A0A3Q0KI75]	schistosoma_mansoni_prjea36577	Transmembrane protein tmp21-related [Source:UniProtKB/TrEMBL;Acc:A0A3Q0KI75]			SM_V10_1
0.52	0.0523194	0.04	0.0754809	0.356	0.324	Muscle 1	Smp_077090	Putative nitrogen fixation protein nifu	Source:UniProtKB/TrEMBL;Acc:G4VTX8]	schistosoma_mansoni_prjea36577	Putative nitrogen fixation protein nifu [Source:UniProtKB/TrEMBL;Acc:G4VTX8]			SM_V10_Z
0.52	0.0500375	0.04	0.0721888	0.538	0.52	Muscle 1	Smp_051210	Importin subunit alpha	Source:UniProtKB/TrEMBL;Acc:G4LY37]	schistosoma_mansoni_prjea36577	Importin subunit alpha [Source:UniProtKB/TrEMBL;Acc:G4LY37]			SM_V10_Z
0.52	0.0441574	0.04	0.0637057	0.046	0.006	Muscle 1	Smp_011680	CD36-like class B scavenger receptor	Source:UniProtKB/TrEMBL;Acc:A0A3Q0KCC0]	schistosoma_mansoni_prjea36577	CD36-like class B scavenger receptor [Source:UniProtKB/TrEMBL;Acc:A0A3Q0KCC0]			SM_V10_Z
0.52	0.0409603	0.04	0.0590933	0.055	0.015	Muscle 1	Smp_304260	Purine nucleoside phosphorylase	Source:UniProtKB/TrEMBL;Acc:A0A5K4F407]	schistosoma_mansoni_prjea36577	Purine nucleoside phosphorylase [Source:UniProtKB/TrEMBL;Acc:A0A5K4F407]			SM_V10_Z
0.52	0.0433057	0.04	0.0624769	0.066	0.025	Muscle 1	Smp_137740	Fucosyltransferase	Source:UniProtKB/TrEMBL;Acc:A0A5K4ENB3]	schistosoma_mansoni_prjea36577	Fucosyltransferase [Source:UniProtKB/TrEMBL;Acc:A0A5K4ENB3]	FucTE	UniProtKB Gene Name	SM_V10_Z
0.52	0.0374124	0.04	0.0539747	0.091	0.05	Muscle 1	Smp_152330	Serine/threonine kinase; cAMP-dependent protein kinase catalytic subunit; cAMP-dependent protein kinase catalytic subunit	Source:UniProtKB/TrEMBL;Acc:C7DPD5]	schistosoma_mansoni_prjea36577	Serine/threonine kinase; cAMP-dependent protein kinase catalytic subunit; cAMP-dependent protein kinase catalytic subunit [Source:UniProtKB/TrEMBL;Acc:C7DPD5]			SM_V10_Z
0.52	0.0472832	0.04	0.0682152	0.144	0.104	Muscle 1	Smp_175640	POU domain protein	Source:UniProtKB/TrEMBL;Acc:A0A3Q0KTC2]	schistosoma_mansoni_prjea36577	POU domain protein [Source:UniProtKB/TrEMBL;Acc:A0A3Q0KTC2]			SM_V10_7
0.52	0.0478424	0.04	0.0690219	0.147	0.109	Muscle 1	Smp_198290	Putative paramyosin	Source:UniProtKB/TrEMBL;Acc:A0A3Q0KUQ2]	schistosoma_mansoni_prjea36577	Putative paramyosin [Source:UniProtKB/TrEMBL;Acc:A0A3Q0KUQ2]			SM_V10_6
0.52	0.0426334	0.04	0.061507	0.067	0.027	Muscle 1	Smp_158670	IRS-type PTB domain-containing protein	Source:UniProtKB/TrEMBL;Acc:A0A3Q0KR16]	schistosoma_mansoni_prjea36577	IRS-type PTB domain-containing protein [Source:UniProtKB/TrEMBL;Acc:A0A3Q0KR16]			SM_V10_6
0.52	0.0265445	0.04	0.0382956	0.116	0.074	Muscle 1	Smp_212310	Serine/threonine-protein kinase DDB_G0282963	Source:UniProtKB/TrEMBL;Acc:A0A3Q0KVL5]	schistosoma_mansoni_prjea36577	Serine/threonine-protein kinase DDB_G0282963 [Source:UniProtKB/TrEMBL;Acc:A0A3Q0KVL5]			SM_V10_6
0.52	0.042049	0.04	0.0606639	0.05	0.009	Muscle 1	Smp_123120	G_PROTEIN_RECEP_F1_2 domain-containing protein	Source:UniProtKB/TrEMBL;Acc:A0A3Q0KKH4]	schistosoma_mansoni_prjea36577	G_PROTEIN_RECEP_F1_2 domain-containing protein [Source:UniProtKB/TrEMBL;Acc:A0A3Q0KKH4]			SM_V10_6
0.52	0.0421753	0.04	0.0608461	0.05	0.01	Muscle 1	Smp_153440	Neuropilin (Nrp) and tolloid (Tll)-like	Source:UniProtKB/TrEMBL;Acc:A0A3Q0KQ84]	schistosoma_mansoni_prjea36577	Neuropilin (Nrp) and tolloid (Tll)-like [Source:UniProtKB/TrEMBL;Acc:A0A3Q0KQ84]			SM_V10_5
0.52	0.0438264	0.04	0.0632281	0.087	0.047	Muscle 1	Smp_152430	CTF/NF-I domain-containing protein	Source:UniProtKB/TrEMBL;Acc:A0A3Q0KQ32]	schistosoma_mansoni_prjea36577	CTF/NF-I domain-containing protein [Source:UniProtKB/TrEMBL;Acc:A0A3Q0KQ32]			SM_V10_5
0.52	0.0635618	0.04	0.0917002	0.423	0.406	Muscle 1	Smp_153950	Putative 60s ribosomal protein L24	Source:UniProtKB/TrEMBL;Acc:A0A3Q0KQB2]	schistosoma_mansoni_prjea36577	Putative 60s ribosomal protein L24 [Source:UniProtKB/TrEMBL;Acc:A0A3Q0KQB2]			SM_V10_4
0.52	0.0489103	0.04	0.0705627	0.228	0.19	Muscle 1	Smp_153890	Putative fgf receptor activating protein	Source:UniProtKB/TrEMBL;Acc:G4VJ18]	schistosoma_mansoni_prjea36577	Putative fgf receptor activating protein [Source:UniProtKB/TrEMBL;Acc:G4VJ18]			SM_V10_4
0.52	0.0418794	0.04	0.0604191	0.087	0.046	Muscle 1	Smp_149040	Phosphorylase b kinase regulatory subunit	Source:UniProtKB/TrEMBL;Acc:A0A3Q0KPK2]	schistosoma_mansoni_prjea36577	Phosphorylase b kinase regulatory subunit [Source:UniProtKB/TrEMBL;Acc:A0A3Q0KPK2]			SM_V10_4
0.52	0.0418735	0.04	0.0604107	0.042	0.002	Muscle 1	Smp_002640	Hox protein Smox1	Source:UniProtKB/TrEMBL;Acc:A0A3Q0KBK7]	schistosoma_mansoni_prjea36577	Hox protein Smox1 [Source:UniProtKB/TrEMBL;Acc:A0A3Q0KBK7]			SM_V10_3
0.52	0.0430506	0.04	0.0621089	0.046	0.006	Muscle 1	Smp_087690	Metalloproteinase inhibitor 1	Source:UniProtKB/TrEMBL;Acc:A0A3Q0KIU6]	schistosoma_mansoni_prjea36577	Metalloproteinase inhibitor 1 [Source:UniProtKB/TrEMBL;Acc:A0A3Q0KIU6]			SM_V10_3
0.52	0.0334217	0.04	0.0482173	0.087	0.047	Muscle 1	Smp_085080	Ciliogenesis-associated TTC17-interacting protein	Source:UniProtKB/TrEMBL;Acc:A0A3Q0KIM6]	schistosoma_mansoni_prjea36577	Ciliogenesis-associated TTC17-interacting protein [Source:UniProtKB/TrEMBL;Acc:A0A3Q0KIM6]			SM_V10_3
0.52	0.0496037	0.04	0.071563	0.236	0.2	Muscle 1	Smp_346670	phosphoglucomutase (alpha-D-glucose-1,6-bisphosphate-dependent)	Source:UniProtKB/TrEMBL;Acc:A0A5K4FE41]	schistosoma_mansoni_prjea36577	phosphoglucomutase (alpha-D-glucose-1,6-bisphosphate-dependent) [Source:UniProtKB/TrEMBL;Acc:A0A5K4FE41]			SM_V10_3
0.52	0.0291368	0.04	0.0420356	0.109	0.068	Muscle 1	Smp_128170	G_PROTEIN_RECEP_F1_2 domain-containing protein	Source:UniProtKB/TrEMBL;Acc:G4VD86]	schistosoma_mansoni_prjea36577	G_PROTEIN_RECEP_F1_2 domain-containing protein [Source:UniProtKB/TrEMBL;Acc:G4VD86]			SM_V10_2
0.52	0.0421525	0.04	0.0608133	0.085	0.045	Muscle 1	Smp_320540	Myeloid-derived growth factor	Source:UniProtKB/TrEMBL;Acc:A0A5K4F7H2]	schistosoma_mansoni_prjea36577	Myeloid-derived growth factor [Source:UniProtKB/TrEMBL;Acc:A0A5K4F7H2]			SM_V10_1
0.52	0.0404475	0.04	0.0583535	0.058	0.018	Muscle 1	Smp_345280	Monocarboxylate transporter 14	Source:UniProtKB/TrEMBL;Acc:A0A5K4FEN5]	schistosoma_mansoni_prjea36577	Monocarboxylate transporter 14 [Source:UniProtKB/TrEMBL;Acc:A0A5K4FEN5]			SM_V10_1
0.52	0.0426769	0.04	0.0615698	0.048	0.008	Muscle 1	Smp_105020	Putative titin	Source:UniProtKB/TrEMBL;Acc:G4V6G9]	schistosoma_mansoni_prjea36577	Putative titin [Source:UniProtKB/TrEMBL;Acc:G4V6G9]			SM_V10_1
0.52	0.0375974	0.04	0.0542416	0.066	0.026	Muscle 1	Smp_328360	CARD domain-containing protein	Source:UniProtKB/TrEMBL;Acc:A0A5K4F6J5]	schistosoma_mansoni_prjea36577	CARD domain-containing protein [Source:UniProtKB/TrEMBL;Acc:A0A5K4F6J5]			SM_V10_1
0.52	0.0547988	0.04	0.079058	0.27	0.237	Muscle 1	Smp_309860	Putative DNA-binding protein rfxank	Source:UniProtKB/TrEMBL;Acc:A0A5K4F6J2]	schistosoma_mansoni_prjea36577	Putative DNA-binding protein rfxank [Source:UniProtKB/TrEMBL;Acc:A0A5K4F6J2]			SM_V10_1
0.52	0.0438961	0.04	0.0633286	0.047	0.007	Muscle 1	Smp_246000	Xenotropic and polytropic retrovirus receptor 1	Source:UniProtKB/TrEMBL;Acc:A0A5K4F2C7]	schistosoma_mansoni_prjea36577	Xenotropic and polytropic retrovirus receptor 1 [Source:UniProtKB/TrEMBL;Acc:A0A5K4F2C7]			SM_V10_1
0.52	0.0370237	0.04	0.0534139	0.154	0.114	Muscle 1	Smp_326410	Protein DPCD	Source:UniProtKB/TrEMBL;Acc:A0A5K4F878]	schistosoma_mansoni_prjea36577	Protein DPCD [Source:UniProtKB/TrEMBL;Acc:A0A5K4F878]			SM_V10_1
0.52	0.06086	0.04	0.0878024	0.406	0.384	Muscle 1	Smp_093310	E2F/DP family, putative	Source:UniProtKB/TrEMBL;Acc:A0A3Q0KJ92]	schistosoma_mansoni_prjea36577	E2F/DP family, putative [Source:UniProtKB/TrEMBL;Acc:A0A3Q0KJ92]			SM_V10_1
0.519	0.041704	0.038	0.0601662	0.043	0.005	Muscle 1	Smp_333260	Protein kinase domain-containing protein	Source:UniProtKB/TrEMBL;Acc:A0A5K4FAT7]	schistosoma_mansoni_prjea36577	Protein kinase domain-containing protein [Source:UniProtKB/TrEMBL;Acc:A0A5K4FAT7]			SM_V10_Z
0.519	0.0405744	0.038	0.0585365	0.046	0.007	Muscle 1	Smp_084090	Putative junctophilin	Source:UniProtKB/TrEMBL;Acc:G4VRF7]	schistosoma_mansoni_prjea36577	Putative junctophilin [Source:UniProtKB/TrEMBL;Acc:G4VRF7]			SM_V10_Z
0.519	0.042981	0.038	0.0620084	0.744	0.755	Muscle 1	Smp_076230	Proteasome subunit alpha type	Source:UniProtKB/TrEMBL;Acc:G4LZ69]	schistosoma_mansoni_prjea36577	Proteasome subunit alpha type [Source:UniProtKB/TrEMBL;Acc:G4LZ69]			SM_V10_Z
0.519	0.0287119	0.038	0.0414226	0.089	0.051	Muscle 1	Smp_139330	NAChR subunit (ShAR1-beta-like)	Source:UniProtKB/TrEMBL;Acc:A0A3Q0KN69]	schistosoma_mansoni_prjea36577	NAChR subunit (ShAR1-beta-like) [Source:UniProtKB/TrEMBL;Acc:A0A3Q0KN69]			SM_V10_7
0.519	0.0600352	0.038	0.0866125	0.359	0.334	Muscle 1	Smp_030920	Mitochondrial import receptor subunit TOM22 homolog	Source:UniProtKB/TrEMBL;Acc:G4VLU0]	schistosoma_mansoni_prjea36577	Mitochondrial import receptor subunit TOM22 homolog [Source:UniProtKB/TrEMBL;Acc:G4VLU0]			SM_V10_6
0.519	0.0357028	0.038	0.0515082	0.175	0.136	Muscle 1	Smp_069900	Rab-related GTP-binding protein	Source:UniProtKB/TrEMBL;Acc:G4VK66]	schistosoma_mansoni_prjea36577	Rab-related GTP-binding protein [Source:UniProtKB/TrEMBL;Acc:G4VK66]			SM_V10_5
0.519	0.023255	0.038	0.0335499	0.295	0.253	Muscle 1	Smp_267000	Ac45-VOA1_TM domain-containing protein	Source:UniProtKB/TrEMBL;Acc:A0A5K4F373]	schistosoma_mansoni_prjea36577	Ac45-VOA1_TM domain-containing protein [Source:UniProtKB/TrEMBL;Acc:A0A5K4F373]			SM_V10_4
0.519	0.0493493	0.038	0.071196	0.455	0.431	Muscle 1	Smp_082940	NADH dehydrogenase	ubiquinone] 1 alpha subcomplex subunit 12	schistosoma_mansoni_prjea36577	NADH dehydrogenase [ubiquinone] 1 alpha subcomplex subunit 12 [Source:UniProtKB/TrEMBL;Acc:G4LYT5]			SM_V10_4
0.519	0.0233038	0.038	0.0336203	0.107	0.068	Muscle 1	Smp_347500	Trichohyalin	Source:UniProtKB/TrEMBL;Acc:A0A5K4FGZ9]	schistosoma_mansoni_prjea36577	Trichohyalin [Source:UniProtKB/TrEMBL;Acc:A0A5K4FGZ9]			SM_V10_4
0.519	0.0402819	0.038	0.0581145	0.126	0.087	Muscle 1	Smp_309970	Protein kinase domain-containing protein	Source:UniProtKB/TrEMBL;Acc:A0A5K4F6K2]	schistosoma_mansoni_prjea36577	Protein kinase domain-containing protein [Source:UniProtKB/TrEMBL;Acc:A0A5K4F6K2]			SM_V10_4
0.519	0.042478	0.038	0.0612828	0.088	0.05	Muscle 1	Smp_156100	Protein wntless homolog	Source:UniProtKB/TrEMBL;Acc:A0A3Q0KQH3]	schistosoma_mansoni_prjea36577	Protein wntless homolog [Source:UniProtKB/TrEMBL;Acc:A0A3Q0KQH3]			SM_V10_4
0.519	0.068026	0.038	0.0981408	0.38	0.362	Muscle 1	Smp_100110	DPH-type MB domain-containing protein	Source:UniProtKB/TrEMBL;Acc:G4VG80]	schistosoma_mansoni_prjea36577	DPH-type MB domain-containing protein [Source:UniProtKB/TrEMBL;Acc:G4VG80]			SM_V10_3
0.519	0.0392172	0.038	0.0565785	0.158	0.119	Muscle 1	Smp_013460	Secretory carrier-associated membrane protein	Source:UniProtKB/TrEMBL;Acc:G4VH48]	schistosoma_mansoni_prjea36577	Secretory carrier-associated membrane protein [Source:UniProtKB/TrEMBL;Acc:G4VH48]			SM_V10_3
0.519	0.0476334	0.038	0.0687205	0.039	0.001	Muscle 1	Smp_343900	Serine/threonine-protein kinase	Source:UniProtKB/TrEMBL;Acc:A0A5K4FFC7]	schistosoma_mansoni_prjea36577	Serine/threonine-protein kinase [Source:UniProtKB/TrEMBL;Acc:A0A5K4FFC7]			SM_V10_3
0.519	0.0418466	0.038	0.0603719	0.047	0.009	Muscle 1	Smp_014840	WW domain-containing protein	Source:UniProtKB/TrEMBL;Acc:A0A3Q0KCM0]	schistosoma_mansoni_prjea36577	WW domain-containing protein [Source:UniProtKB/TrEMBL;Acc:A0A3Q0KCM0]			SM_V10_2
0.519	0.0375881	0.038	0.0542282	0.112	0.073	Muscle 1	Smp_148370	GRIP domain-containing protein	Source:UniProtKB/TrEMBL;Acc:A0A3Q0KPN8]	schistosoma_mansoni_prjea36577	GRIP domain-containing protein [Source:UniProtKB/TrEMBL;Acc:A0A3Q0KPN8]			SM_V10_2
0.519	0.0471376	0.038	0.0680051	0.295	0.262	Muscle 1	Smp_063580	Putative n-acetyltransferase mak3	Source:UniProtKB/TrEMBL;Acc:G4VA08]	schistosoma_mansoni_prjea36577	Putative n-acetyltransferase mak3 [Source:UniProtKB/TrEMBL;Acc:G4VA08]			SM_V10_2
0.519	0.0384786	0.038	0.0555129	0.059	0.021	Muscle 1	Smp_013860	Glutamate--cysteine ligase	Source:UniProtKB/TrEMBL;Acc:A0A3Q0KCJ1]	schistosoma_mansoni_prjea36577	Glutamate--cysteine ligase [Source:UniProtKB/TrEMBL;Acc:A0A3Q0KCJ1]			SM_V10_2
0.519	0.0553968	0.038	0.0799206	0.253	0.221	Muscle 1	Smp_075870	Translocation associated membrane protein,putative	Source:UniProtKB/TrEMBL;Acc:G4LUW4]	schistosoma_mansoni_prjea36577	Translocation associated membrane protein,putative [Source:UniProtKB/TrEMBL;Acc:G4LUW4]			SM_V10_1
0.519	0.0551339	0.038	0.0795414	0.329	0.297	Muscle 1	Smp_093690	RNA helicase	Source:UniProtKB/TrEMBL;Acc:G4V9R1]	schistosoma_mansoni_prjea36577	RNA helicase [Source:UniProtKB/TrEMBL;Acc:G4V9R1]			SM_V10_1
0.519	0.0439022	0.038	0.0633375	0.223	0.186	Muscle 1	Smp_093700	Putative membrane associated progesterone receptor	Source:UniProtKB/TrEMBL;Acc:G4V9R2]	schistosoma_mansoni_prjea36577	Putative membrane associated progesterone receptor [Source:UniProtKB/TrEMBL;Acc:G4V9R2]			SM_V10_1
0.519	0.0431994	0.038	0.0623236	0.147	0.109	Muscle 1	Smp_333150	Metastasis-associated protein MTA3	Source:UniProtKB/TrEMBL;Acc:A0A5K4F8F6]	schistosoma_mansoni_prjea36577	Metastasis-associated protein MTA3 [Source:UniProtKB/TrEMBL;Acc:A0A5K4F8F6]			SM_V10_1
0.519	0.0498719	0.038	0.07195	0.287	0.256	Muscle 1	Smp_166040	ATP-dependent transporter, putative	Source:UniProtKB/TrEMBL;Acc:C4QJ35]	schistosoma_mansoni_prjea36577	ATP-dependent transporter, putative [Source:UniProtKB/TrEMBL;Acc:C4QJ35]			SM_V10_1
0.519	0.0455892	0.038	0.0657714	0.213	0.177	Muscle 1	Smp_089640	Succinate dehydrogenase	ubiquinone] iron-sulfur subunit, mitochondrial	schistosoma_mansoni_prjea36577	Succinate dehydrogenase [ubiquinone] iron-sulfur subunit, mitochondrial [Source:UniProtKB/TrEMBL;Acc:A0A5K4EI03]			SM_V10_1
0.518	0.0396852	0.036	0.0572537	0.114	0.078	Muscle 1	Smp_266810	Protein kinase domain-containing protein	Source:UniProtKB/TrEMBL;Acc:A0A5K4F2S5]	schistosoma_mansoni_prjea36577	Protein kinase domain-containing protein [Source:UniProtKB/TrEMBL;Acc:A0A5K4F2S5]			SM_V10_Z
0.518	0.0313952	0.036	0.0452936	0.076	0.04	Muscle 1	Smp_244400	FERM domain-containing protein	Source:UniProtKB/TrEMBL;Acc:A0A5K4F1E6]	schistosoma_mansoni_prjea36577	FERM domain-containing protein [Source:UniProtKB/TrEMBL;Acc:A0A5K4F1E6]			SM_V10_Z
0.518	0.0473123	0.036	0.0682572	0.214	0.179	Muscle 1	Smp_024030	39S ribosomal protein L49, mitochondrial	Source:UniProtKB/TrEMBL;Acc:A0A3Q0KDD8]	schistosoma_mansoni_prjea36577	39S ribosomal protein L49, mitochondrial [Source:UniProtKB/TrEMBL;Acc:A0A3Q0KDD8]			SM_V10_Z
0.518	0.0513594	0.036	0.074096	0.483	0.463	Muscle 1	Smp_337395	Ribosome biogenesis regulatory protein	Source:UniProtKB/TrEMBL;Acc:G4LX62]	schistosoma_mansoni_prjea36577	Ribosome biogenesis regulatory protein [Source:UniProtKB/TrEMBL;Acc:G4LX62]			SM_V10_Z
0.518	0.0542429	0.036	0.0782559	0.401	0.378	Muscle 1	Smp_012070	RRP15-like protein	Source:UniProtKB/TrEMBL;Acc:G4VS07]	schistosoma_mansoni_prjea36577	RRP15-like protein [Source:UniProtKB/TrEMBL;Acc:G4VS07]			SM_V10_Z
0.518	0.0359004	0.036	0.0517934	0.046	0.01	Muscle 1	Smp_135010	Putative oxalate:formate antiporter	Source:UniProtKB/TrEMBL;Acc:A0A3Q0KME7]	schistosoma_mansoni_prjea36577	Putative oxalate:formate antiporter [Source:UniProtKB/TrEMBL;Acc:A0A3Q0KME7]			SM_V10_Z
0.518	0.0585198	0.036	0.0844262	0.309	0.281	Muscle 1	Smp_027240	28S ribosomal protein S18c, mitochondrial	Source:UniProtKB/TrEMBL;Acc:G4VHC3]	schistosoma_mansoni_prjea36577	28S ribosomal protein S18c, mitochondrial [Source:UniProtKB/TrEMBL;Acc:G4VHC3]			SM_V10_4
0.518	0.0456594	0.036	0.0658725	0.134	0.099	Muscle 1	Smp_213510	Protein FAM160B1	Source:UniProtKB/TrEMBL;Acc:A0A5K4F296]	schistosoma_mansoni_prjea36577	Protein FAM160B1 [Source:UniProtKB/TrEMBL;Acc:A0A5K4F296]			SM_V10_4
0.518	0.0402232	0.036	0.0580299	0.106	0.071	Muscle 1	Smp_148940	Sorting nexin, putative	Source:UniProtKB/TrEMBL;Acc:A0A5K4ER96]	schistosoma_mansoni_prjea36577	Sorting nexin, putative [Source:UniProtKB/TrEMBL;Acc:A0A5K4ER96]			SM_V10_4
0.518	0.0394152	0.036	0.0568641	0.158	0.123	Muscle 1	Smp_086900	ADP-ribosylation factor, arf, putative	Source:UniProtKB/TrEMBL;Acc:G4LXT7]	schistosoma_mansoni_prjea36577	ADP-ribosylation factor, arf, putative [Source:UniProtKB/TrEMBL;Acc:G4LXT7]			SM_V10_4
0.518	0.0310169	0.036	0.0447479	0.071	0.035	Muscle 1	Smp_023620	Putative 4.1 G protein	Source:UniProtKB/TrEMBL;Acc:G4VFT3]	schistosoma_mansoni_prjea36577	Putative 4.1 G protein [Source:UniProtKB/TrEMBL;Acc:G4VFT3]			SM_V10_3
0.518	0.031987	0.036	0.0461475	0.071	0.035	Muscle 1	Smp_138430	Smp_138430	Smp_138430~	schistosoma_mansoni_prjea36577				SM_V10_3
0.518	0.0328991	0.036	0.0474633	0.105	0.069	Muscle 1	Smp_187190	Innexin	Source:UniProtKB/TrEMBL;Acc:A0A3Q0KU38]	schistosoma_mansoni_prjea36577	Innexin [Source:UniProtKB/TrEMBL;Acc:A0A3Q0KU38]	inx	UniProtKB Gene Name	SM_V10_3
0.518	0.0294625	0.036	0.0425053	0.12	0.083	Muscle 1	Smp_037640	2'-phosphotransferase	Source:UniProtKB/TrEMBL;Acc:A0A5K4ECQ7]	schistosoma_mansoni_prjea36577	2'-phosphotransferase [Source:UniProtKB/TrEMBL;Acc:A0A5K4ECQ7]			SM_V10_2
0.518	0.0490985	0.036	0.0708342	0.243	0.211	Muscle 1	Smp_047370	Malate dehydrogenase	Source:UniProtKB/TrEMBL;Acc:G4VBJ0]	schistosoma_mansoni_prjea36577	Malate dehydrogenase [Source:UniProtKB/TrEMBL;Acc:G4VBJ0]			SM_V10_2
0.518	0.0362273	0.036	0.0522649	0.044	0.008	Muscle 1	Smp_310520	Stealth_CR2 domain-containing protein	Source:UniProtKB/TrEMBL;Acc:A0A5K4F3K3]	schistosoma_mansoni_prjea36577	Stealth_CR2 domain-containing protein [Source:UniProtKB/TrEMBL;Acc:A0A5K4F3K3]			SM_V10_2
0.518	0.0401132	0.036	0.0578712	0.155	0.119	Muscle 1	Smp_016340	Mediator of RNA polymerase II transcription subunit 8	Source:UniProtKB/TrEMBL;Acc:G4VHF6]	schistosoma_mansoni_prjea36577	Mediator of RNA polymerase II transcription subunit 8 [Source:UniProtKB/TrEMBL;Acc:G4VHF6]	MED8	UniProtKB Gene Name	SM_V10_2
0.518	0.0364641	0.036	0.0526066	0.151	0.115	Muscle 1	Smp_136700	Smp_136700	Smp_136700~	schistosoma_mansoni_prjea36577				SM_V10_1
0.518	0.0373415	0.036	0.0538723	0.056	0.021	Muscle 1	Smp_149740	Alzheimer's disease beta-amyloid related	Source:UniProtKB/TrEMBL;Acc:A0A3Q0KPN9]	schistosoma_mansoni_prjea36577	Alzheimer's disease beta-amyloid related [Source:UniProtKB/TrEMBL;Acc:A0A3Q0KPN9]			SM_V10_1
0.518	0.031035	0.036	0.0447741	0.28	0.242	Muscle 1	Smp_099890	Receptor expression-enhancing protein	Source:UniProtKB/TrEMBL;Acc:A0A3Q0KJR0]	schistosoma_mansoni_prjea36577	Receptor expression-enhancing protein [Source:UniProtKB/TrEMBL;Acc:A0A3Q0KJR0]			SM_V10_1
0.518	0.0393676	0.036	0.0567954	0.086	0.051	Muscle 1	Smp_161400	Jumonji domain containing protein-related including hairless	Source:UniProtKB/TrEMBL;Acc:A0A3Q0KRF0]	schistosoma_mansoni_prjea36577	Jumonji domain containing protein-related including hairless [Source:UniProtKB/TrEMBL;Acc:A0A3Q0KRF0]			SM_V10_1
0.518	0.0461119	0.036	0.0665255	0.109	0.073	Muscle 1	Smp_024500	ApaG domain-containing protein	Source:UniProtKB/TrEMBL;Acc:G4V8R3]	schistosoma_mansoni_prjea36577	ApaG domain-containing protein [Source:UniProtKB/TrEMBL;Acc:G4V8R3]			SM_V10_1
0.517	0.0369498	0.034	0.0533072	0.058	0.023	Muscle 1	Smp_150340	Monocarboxylate transporter, putative	Source:UniProtKB/TrEMBL;Acc:G4LYW9]	schistosoma_mansoni_prjea36577	Monocarboxylate transporter, putative [Source:UniProtKB/TrEMBL;Acc:G4LYW9]			SM_V10_Z
0.517	0.030187	0.034	0.0435506	0.061	0.027	Muscle 1	Smp_335200	Smp_335200	Smp_335200~	schistosoma_mansoni_prjea36577				SM_V10_Z
0.517	0.0125961	0.034	0.0181724	0.107	0.071	Muscle 1	Smp_076010	DUF4005 domain-containing protein	Source:UniProtKB/TrEMBL;Acc:A0A3Q0KHY5]	schistosoma_mansoni_prjea36577	DUF4005 domain-containing protein [Source:UniProtKB/TrEMBL;Acc:A0A3Q0KHY5]			SM_V10_Z
0.517	0.0294276	0.034	0.0424551	0.066	0.032	Muscle 1	Smp_151190	Retinal rod rhodopsin-sensitive cgmp 3',5'-cyclic phosphodiesterase, putative	Source:UniProtKB/TrEMBL;Acc:G4LYK2]	schistosoma_mansoni_prjea36577	Retinal rod rhodopsin-sensitive cgmp 3',5'-cyclic phosphodiesterase, putative [Source:UniProtKB/TrEMBL;Acc:G4LYK2]			SM_V10_Z
0.517	0.0463826	0.034	0.066916	0.252	0.222	Muscle 1	Smp_203810	LITAF domain-containing protein	Source:UniProtKB/TrEMBL;Acc:G4VQL3]	schistosoma_mansoni_prjea36577	LITAF domain-containing protein [Source:UniProtKB/TrEMBL;Acc:G4VQL3]			SM_V10_Z
0.517	0.0298936	0.034	0.0431273	0.058	0.025	Muscle 1	Smp_136540	DNAj-related	Source:UniProtKB/TrEMBL;Acc:A0A3Q0KMN2]	schistosoma_mansoni_prjea36577	DNAj-related [Source:UniProtKB/TrEMBL;Acc:A0A3Q0KMN2]			SM_V10_Z
0.517	0.0379358	0.034	0.0547298	0.205	0.172	Muscle 1	Smp_076370	Inhibitor of apoptosis protein,putative	Source:UniProtKB/TrEMBL;Acc:A0A3Q0KHY2]	schistosoma_mansoni_prjea36577	Inhibitor of apoptosis protein,putative [Source:UniProtKB/TrEMBL;Acc:A0A3Q0KHY2]			SM_V10_Z
0.517	0.0329909	0.034	0.0475959	0.117	0.083	Muscle 1	Smp_147400	Putative p53 regulated pa26 nuclear protein sestrin	Source:UniProtKB/TrEMBL;Acc:A0A3Q0KPB5]	schistosoma_mansoni_prjea36577	Putative p53 regulated pa26 nuclear protein sestrin [Source:UniProtKB/TrEMBL;Acc:A0A3Q0KPB5]			SM_V10_Z
0.517	0.0429772	0.034	0.062003	0.215	0.183	Muscle 1	Smp_143060	AP complex subunit sigma	Source:UniProtKB/TrEMBL;Acc:G4VTG6]	schistosoma_mansoni_prjea36577	AP complex subunit sigma [Source:UniProtKB/TrEMBL;Acc:G4VTG6]			SM_V10_Z
0.517	0.0113492	0.034	0.0163735	0.566	0.544	Muscle 1	Smp_900110	NADH-ubiquinone oxidoreductase chain 1	Source:UniProtKB/TrEMBL;Acc:A0A3Q0KVM1]	schistosoma_mansoni_prjea36577	NADH-ubiquinone oxidoreductase chain 1 [Source:UniProtKB/TrEMBL;Acc:A0A3Q0KVM1]			SM_V10_MITO
0.517	0.00871829	0.034	0.0125778	0.57	0.543	Muscle 1	Smp_041500	Robl_LC7 domain-containing protein	Source:UniProtKB/TrEMBL;Acc:G4LWW9]	schistosoma_mansoni_prjea36577	Robl_LC7 domain-containing protein [Source:UniProtKB/TrEMBL;Acc:G4LWW9]			SM_V10_7
0.517	0.0331789	0.034	0.0478671	0.078	0.044	Muscle 1	Smp_041430	14-3-3 protein, putative	Source:UniProtKB/TrEMBL;Acc:G4LWW0]	schistosoma_mansoni_prjea36577	14-3-3 protein, putative [Source:UniProtKB/TrEMBL;Acc:G4LWW0]			SM_V10_7
0.517	0.0297856	0.034	0.0429715	0.112	0.077	Muscle 1	Smp_179350	IRS-type PTB domain-containing protein	Source:UniProtKB/TrEMBL;Acc:A0A3Q0KTN2]	schistosoma_mansoni_prjea36577	IRS-type PTB domain-containing protein [Source:UniProtKB/TrEMBL;Acc:A0A3Q0KTN2]			SM_V10_6
0.517	0.0365768	0.034	0.0527692	0.058	0.025	Muscle 1	Smp_141770	glycerol kinase	Source:UniProtKB/TrEMBL;Acc:A0A5K4EPC1]	schistosoma_mansoni_prjea36577	glycerol kinase [Source:UniProtKB/TrEMBL;Acc:A0A5K4EPC1]			SM_V10_6
0.517	0.0361284	0.034	0.0521223	0.064	0.03	Muscle 1	Smp_013150	riboflavin kinase	Source:UniProtKB/TrEMBL;Acc:G4M0L1]	schistosoma_mansoni_prjea36577	riboflavin kinase [Source:UniProtKB/TrEMBL;Acc:G4M0L1]			SM_V10_5
0.517	0.0453885	0.034	0.0654818	0.228	0.196	Muscle 1	Smp_151070	DRB sensitivity-inducing factor large subunit	Source:UniProtKB/TrEMBL;Acc:A0A3Q0KPW2]	schistosoma_mansoni_prjea36577	DRB sensitivity-inducing factor large subunit [Source:UniProtKB/TrEMBL;Acc:A0A3Q0KPW2]			SM_V10_4
0.517	0.0362193	0.034	0.0522534	0.057	0.023	Muscle 1	Smp_334310	TACC_C domain-containing protein	Source:UniProtKB/TrEMBL;Acc:A0A5K4F8A4]	schistosoma_mansoni_prjea36577	TACC_C domain-containing protein [Source:UniProtKB/TrEMBL;Acc:A0A5K4F8A4]			SM_V10_4
0.517	0.0346283	0.034	0.0499581	0.064	0.03	Muscle 1	Smp_000900	Putative g-protein coupled receptor	Source:UniProtKB/TrEMBL;Acc:A0A3Q0KBF0]	schistosoma_mansoni_prjea36577	Putative g-protein coupled receptor [Source:UniProtKB/TrEMBL;Acc:A0A3Q0KBF0]			SM_V10_3
0.517	0.0334856	0.034	0.0483095	0.036	0.002	Muscle 1	Smp_126420	ZP domain-containing protein	Source:UniProtKB/TrEMBL;Acc:G4V5P2]	schistosoma_mansoni_prjea36577	ZP domain-containing protein [Source:UniProtKB/TrEMBL;Acc:G4V5P2]			SM_V10_3
0.517	0.0334173	0.034	0.048211	0.103	0.07	Muscle 1	Smp_027870	Transport and Golgi organization protein 1	Source:UniProtKB/TrEMBL;Acc:A0A3Q0KDP6]	schistosoma_mansoni_prjea36577	Transport and Golgi organization protein 1 [Source:UniProtKB/TrEMBL;Acc:A0A3Q0KDP6]			SM_V10_3
0.517	0.0352252	0.034	0.0508192	0.093	0.059	Muscle 1	Smp_030220	Putative phosphoglycolate/pyridoxal phosphate phosphatase	Source:UniProtKB/TrEMBL;Acc:A0A3Q0KDU9]	schistosoma_mansoni_prjea36577	Putative phosphoglycolate/pyridoxal phosphate phosphatase [Source:UniProtKB/TrEMBL;Acc:A0A3Q0KDU9]	PLP-Ph	UniProtKB Gene Name	SM_V10_3
0.517	0.0346686	0.034	0.0500162	0.083	0.049	Muscle 1	Smp_123570	BHLH domain-containing protein	Source:UniProtKB/TrEMBL;Acc:A0A3Q0KKM5]	schistosoma_mansoni_prjea36577	BHLH domain-containing protein [Source:UniProtKB/TrEMBL;Acc:A0A3Q0KKM5]			SM_V10_3
0.517	0.0384984	0.034	0.0555415	0.055	0.021	Muscle 1	Smp_181490	Serine/threonine kinase	Source:UniProtKB/TrEMBL;Acc:A0A3Q0KU31]	schistosoma_mansoni_prjea36577	Serine/threonine kinase [Source:UniProtKB/TrEMBL;Acc:A0A3Q0KU31]			SM_V10_3
0.517	0.0359136	0.034	0.0518123	0.036	0.001	Muscle 1	Smp_341140	Protein kinase domain-containing protein	Source:UniProtKB/TrEMBL;Acc:A0A5K4FEA7]	schistosoma_mansoni_prjea36577	Protein kinase domain-containing protein [Source:UniProtKB/TrEMBL;Acc:A0A5K4FEA7]			SM_V10_3
0.517	0.0355711	0.034	0.0513182	0.101	0.068	Muscle 1	Smp_328530	Transmembrane protein	Source:UniProtKB/TrEMBL;Acc:A0A5K4F994]	schistosoma_mansoni_prjea36577	Transmembrane protein [Source:UniProtKB/TrEMBL;Acc:A0A5K4F994]			SM_V10_2
0.517	0.0284628	0.034	0.0410632	0.049	0.016	Muscle 1	Smp_245720	Putative monocarboxylate transporter	Source:UniProtKB/TrEMBL;Acc:A0A5K4F0U9]	schistosoma_mansoni_prjea36577	Putative monocarboxylate transporter [Source:UniProtKB/TrEMBL;Acc:A0A5K4F0U9]			SM_V10_2
0.517	0.0373625	0.034	0.0539027	0.039	0.004	Muscle 1	Smp_303000	Cadherin	Source:UniProtKB/TrEMBL;Acc:A0A5K4F295]	schistosoma_mansoni_prjea36577	Cadherin [Source:UniProtKB/TrEMBL;Acc:A0A5K4F295]			SM_V10_1
0.517	0.0297249	0.034	0.042884	0.134	0.1	Muscle 1	Smp_059780	Putative rab6-interacting protein 2 (ERC protein 1)	Source:UniProtKB/TrEMBL;Acc:A0A3Q0KGI4]	schistosoma_mansoni_prjea36577	Putative rab6-interacting protein 2 (ERC protein 1) [Source:UniProtKB/TrEMBL;Acc:A0A3Q0KGI4]			SM_V10_1
0.517	0.0376303	0.034	0.054289	0.074	0.039	Muscle 1	Smp_049740	ALMS_motif domain-containing protein	Source:UniProtKB/TrEMBL;Acc:A0A3Q0KFP0]	schistosoma_mansoni_prjea36577	ALMS_motif domain-containing protein [Source:UniProtKB/TrEMBL;Acc:A0A3Q0KFP0]			SM_V10_1
0.517	0.0350625	0.034	0.0505846	0.063	0.028	Muscle 1	Smp_160780	Putative voltage-gated potassium channel	Source:UniProtKB/TrEMBL;Acc:G4V7X8]	schistosoma_mansoni_prjea36577	Putative voltage-gated potassium channel [Source:UniProtKB/TrEMBL;Acc:G4V7X8]			SM_V10_1
0.517	0.0542696	0.034	0.0782944	0.462	0.443	Muscle 1	Smp_032060	RRM domain-containing protein	Source:UniProtKB/TrEMBL;Acc:G4LYM0]	schistosoma_mansoni_prjea36577	RRM domain-containing protein [Source:UniProtKB/TrEMBL;Acc:G4LYM0]			SM_V10_1
0.517	0.0355887	0.034	0.0513436	0.118	0.084	Muscle 1	Smp_126030	Putative pre-B-cell leukemia transcription factor 1, 2,3, 4 (Pbx)	Source:UniProtKB/TrEMBL;Acc:A0A3Q0KL02]	schistosoma_mansoni_prjea36577	Putative pre-B-cell leukemia transcription factor 1, 2,3, 4 (Pbx) [Source:UniProtKB/TrEMBL;Acc:A0A3Q0KL02]			SM_V10_1
0.517	0.0325069	0.034	0.0468976	0.09	0.055	Muscle 1	Smp_210780	Putative vacuolar protein sorting 26, vps26	Source:UniProtKB/TrEMBL;Acc:A0A3Q0KV65]	schistosoma_mansoni_prjea36577	Putative vacuolar protein sorting 26, vps26 [Source:UniProtKB/TrEMBL;Acc:A0A3Q0KV65]			SM_V10_1
0.517	0.0346791	0.034	0.0500313	0.073	0.039	Muscle 1	Smp_019900	Putative zygin	Source:UniProtKB/TrEMBL;Acc:A0A3Q0KD17]	schistosoma_mansoni_prjea36577	Putative zygin [Source:UniProtKB/TrEMBL;Acc:A0A3Q0KD17]			SM_V10_1
0.517	0.0352662	0.034	0.0508784	0.098	0.065	Muscle 1	Smp_159740	Putative solute carrier family 33 (Acetyl-CoA transporter)	Source:UniProtKB/TrEMBL;Acc:A0A5K4EU96]	schistosoma_mansoni_prjea36577	Putative solute carrier family 33 (Acetyl-CoA transporter) [Source:UniProtKB/TrEMBL;Acc:A0A5K4EU96]			SM_V10_1
0.516	0.0340949	0.032	0.0491885	0.039	0.008	Muscle 1	Smp_163160	Putative transient receptor potential channel	Source:UniProtKB/TrEMBL;Acc:A0A3Q0KRX8]	schistosoma_mansoni_prjea36577	Putative transient receptor potential channel [Source:UniProtKB/TrEMBL;Acc:A0A3Q0KRX8]			SM_V10_Z
0.516	0.0318409	0.032	0.0459367	0.087	0.055	Muscle 1	Smp_333300	BZIP domain-containing protein	Source:UniProtKB/TrEMBL;Acc:A0A5K4F7Y4]	schistosoma_mansoni_prjea36577	BZIP domain-containing protein [Source:UniProtKB/TrEMBL;Acc:A0A5K4F7Y4]			SM_V10_Z
0.516	0.0296356	0.032	0.0427551	0.122	0.09	Muscle 1	Smp_204380	Smp_204380	Source:UniProtKB/TrEMBL;Acc:G4LWZ6]	schistosoma_mansoni_prjea36577	Smp_204380 [Source:UniProtKB/TrEMBL;Acc:G4LWZ6]			SM_V10_Z
0.516	0.0343711	0.032	0.049587	0.115	0.082	Muscle 1	Smp_043940	Synaptosomal associated protein, putative	Source:UniProtKB/TrEMBL;Acc:A0A3Q0KF49]	schistosoma_mansoni_prjea36577	Synaptosomal associated protein, putative [Source:UniProtKB/TrEMBL;Acc:A0A3Q0KF49]			SM_V10_Z
0.516	0.0340156	0.032	0.0490741	0.124	0.092	Muscle 1	Smp_062950	Growth factor receptor-bound protein, putative	Source:UniProtKB/TrEMBL;Acc:G4M1G7]	schistosoma_mansoni_prjea36577	Growth factor receptor-bound protein, putative [Source:UniProtKB/TrEMBL;Acc:G4M1G7]			SM_V10_Z
0.516	0.0392034	0.032	0.0565585	0.099	0.068	Muscle 1	Smp_158130	ethanolamine-phosphate cytidylyltransferase	Source:UniProtKB/TrEMBL;Acc:A0A3Q0KQW9]	schistosoma_mansoni_prjea36577	ethanolamine-phosphate cytidylyltransferase [Source:UniProtKB/TrEMBL;Acc:A0A3Q0KQW9]			SM_V10_6
0.516	0.0312886	0.032	0.0451399	0.088	0.057	Muscle 1	Smp_095810	Putative uracil phosphoribosyltransferase	Source:UniProtKB/TrEMBL;Acc:G4VL95]	schistosoma_mansoni_prjea36577	Putative uracil phosphoribosyltransferase [Source:UniProtKB/TrEMBL;Acc:G4VL95]			SM_V10_6
0.516	0.0470016	0.032	0.0678089	0.25	0.223	Muscle 1	Smp_053990	Putative heat shock protein 70 (Hsp70)-interacting protein	Source:UniProtKB/TrEMBL;Acc:G4VHQ8]	schistosoma_mansoni_prjea36577	Putative heat shock protein 70 (Hsp70)-interacting protein [Source:UniProtKB/TrEMBL;Acc:G4VHQ8]			SM_V10_4
0.516	0.0329698	0.032	0.0475653	0.036	0.005	Muscle 1	Smp_334440	MTP_lip_bd domain-containing protein	Source:UniProtKB/TrEMBL;Acc:A0A5K4FCN8]	schistosoma_mansoni_prjea36577	MTP_lip_bd domain-containing protein [Source:UniProtKB/TrEMBL;Acc:A0A5K4FCN8]			SM_V10_4
0.516	0.032625	0.032	0.047068	0.131	0.098	Muscle 1	Smp_055670	small monomeric GTPase	Source:UniProtKB/TrEMBL;Acc:G4VHJ2]	schistosoma_mansoni_prjea36577	small monomeric GTPase [Source:UniProtKB/TrEMBL;Acc:G4VHJ2]			SM_V10_4
0.516	0.0404579	0.032	0.0583684	0.216	0.187	Muscle 1	Smp_329620	Autophagy-related protein 101	Source:UniProtKB/TrEMBL;Acc:G4VJK8]	schistosoma_mansoni_prjea36577	Autophagy-related protein 101 [Source:UniProtKB/TrEMBL;Acc:G4VJK8]			SM_V10_4
0.516	0.0377818	0.032	0.0545076	0.111	0.079	Muscle 1	Smp_155770	UPF0536 protein C12orf66-like protein	Source:UniProtKB/TrEMBL;Acc:A0A3Q0KQL2]	schistosoma_mansoni_prjea36577	UPF0536 protein C12orf66-like protein [Source:UniProtKB/TrEMBL;Acc:A0A3Q0KQL2]			SM_V10_4
0.516	0.0377574	0.032	0.0544724	0.094	0.061	Muscle 1	Smp_346970	PRKCSH domain-containing protein	Source:UniProtKB/TrEMBL;Acc:A0A5K4FBY8]	schistosoma_mansoni_prjea36577	PRKCSH domain-containing protein [Source:UniProtKB/TrEMBL;Acc:A0A5K4FBY8]			SM_V10_4
0.516	0.0441944	0.032	0.063759	0.293	0.268	Muscle 1	Smp_036920	DNA polymerase epsilon subunit, putative	Source:UniProtKB/TrEMBL;Acc:G4M1B2]	schistosoma_mansoni_prjea36577	DNA polymerase epsilon subunit, putative [Source:UniProtKB/TrEMBL;Acc:G4M1B2]			SM_V10_4
0.516	0.0450694	0.032	0.0650214	0.77	0.796	Muscle 1	Smp_000880	ATPase protein 9	Source:UniProtKB/TrEMBL;Acc:A0A3Q0KBF1]	schistosoma_mansoni_prjea36577	ATPase protein 9 [Source:UniProtKB/TrEMBL;Acc:A0A3Q0KBF1]			SM_V10_3
0.516	0.0360613	0.032	0.0520254	0.101	0.069	Muscle 1	Smp_027000	Family S9 unassigned peptidase (S09 family)	Source:UniProtKB/TrEMBL;Acc:G4VFZ6]	schistosoma_mansoni_prjea36577	Family S9 unassigned peptidase (S09 family) [Source:UniProtKB/TrEMBL;Acc:G4VFZ6]			SM_V10_3
0.516	0.04248	0.032	0.0612856	0.194	0.164	Muscle 1	Smp_168160	Putative ubiquitin ligase E3a	Source:UniProtKB/TrEMBL;Acc:A0A3Q0KSG0]	schistosoma_mansoni_prjea36577	Putative ubiquitin ligase E3a [Source:UniProtKB/TrEMBL;Acc:A0A3Q0KSG0]			SM_V10_3
0.516	0.0333828	0.032	0.0481613	0.076	0.044	Muscle 1	Smp_123630	Ubiquitin carboxyl-terminal hydrolase	Source:UniProtKB/TrEMBL;Acc:A0A3Q0KKN0]	schistosoma_mansoni_prjea36577	Ubiquitin carboxyl-terminal hydrolase [Source:UniProtKB/TrEMBL;Acc:A0A3Q0KKN0]			SM_V10_3
0.516	0.0329329	0.032	0.0475122	0.072	0.04	Muscle 1	Smp_128790	Tyrosine-protein kinase	Source:UniProtKB/TrEMBL;Acc:A0A3Q0KLG3]	schistosoma_mansoni_prjea36577	Tyrosine-protein kinase [Source:UniProtKB/TrEMBL;Acc:A0A3Q0KLG3]	abl2	UniProtKB Gene Name	SM_V10_2
0.516	0.0461848	0.032	0.0666306	0.312	0.286	Muscle 1	Smp_082710	N-acetylglucosaminyldiphosphodolichol N-acetylglucosaminyltransferase	Source:UniProtKB/TrEMBL;Acc:G4VC87]	schistosoma_mansoni_prjea36577	N-acetylglucosaminyldiphosphodolichol N-acetylglucosaminyltransferase [Source:UniProtKB/TrEMBL;Acc:G4VC87]			SM_V10_2
0.516	0.0310915	0.032	0.0448556	0.115	0.083	Muscle 1	Smp_004260	E2F-associated phosphoprotein	Source:UniProtKB/TrEMBL;Acc:A0A3Q0KBQ3]	schistosoma_mansoni_prjea36577	E2F-associated phosphoprotein [Source:UniProtKB/TrEMBL;Acc:A0A3Q0KBQ3]			SM_V10_2
0.516	0.0373844	0.032	0.0539343	0.041	0.009	Muscle 1	Smp_245660	Potassium channel subfamily K member 18	Source:UniProtKB/TrEMBL;Acc:A0A5K4F260]	schistosoma_mansoni_prjea36577	Potassium channel subfamily K member 18 [Source:UniProtKB/TrEMBL;Acc:A0A5K4F260]			SM_V10_2
0.516	0.0407748	0.032	0.0588256	0.064	0.031	Muscle 1	Smp_026790	HTH_48 domain-containing protein	Source:UniProtKB/TrEMBL;Acc:G4LUS5]	schistosoma_mansoni_prjea36577	HTH_48 domain-containing protein [Source:UniProtKB/TrEMBL;Acc:G4LUS5]			SM_V10_1
0.516	0.0364158	0.032	0.0525369	0.033	0.001	Muscle 1	Smp_139200	Nuclear hormone receptor nor-1/nor-2, putative	Source:UniProtKB/TrEMBL;Acc:A0A3Q0KN41]	schistosoma_mansoni_prjea36577	Nuclear hormone receptor nor-1/nor-2, putative [Source:UniProtKB/TrEMBL;Acc:A0A3Q0KN41]			SM_V10_1
0.516	0.0306919	0.032	0.0442791	0.08	0.049	Muscle 1	Smp_171820	Neuropathy target esterase/swiss cheese-related protein	Source:UniProtKB/TrEMBL;Acc:A0A3Q0KSZ8]	schistosoma_mansoni_prjea36577	Neuropathy target esterase/swiss cheese-related protein [Source:UniProtKB/TrEMBL;Acc:A0A3Q0KSZ8]			SM_V10_1
0.516	0.0318066	0.032	0.0458873	0.048	0.016	Muscle 1	Smp_140560	TLC domain-containing protein	Source:UniProtKB/TrEMBL;Acc:G4V9U1]	schistosoma_mansoni_prjea36577	TLC domain-containing protein [Source:UniProtKB/TrEMBL;Acc:G4V9U1]			SM_V10_1
0.516	0.0369688	0.032	0.0533348	0.202	0.17	Muscle 1	Smp_073720	Actin-related protein 2/3 complex subunit 5	Source:UniProtKB/TrEMBL;Acc:G4V6Z7]	schistosoma_mansoni_prjea36577	Actin-related protein 2/3 complex subunit 5 [Source:UniProtKB/TrEMBL;Acc:G4V6Z7]			SM_V10_1
0.515	0.0294579	0.03	0.0424988	0.109	0.079	Muscle 1	Smp_071610	Family S28 unassigned peptidase (S28 family)	Source:UniProtKB/TrEMBL;Acc:G4VRT6]	schistosoma_mansoni_prjea36577	Family S28 unassigned peptidase (S28 family) [Source:UniProtKB/TrEMBL;Acc:G4VRT6]			SM_V10_Z
0.515	0.029087	0.03	0.0419637	0.055	0.026	Muscle 1	Smp_306200	FERM domain-containing protein	Source:UniProtKB/TrEMBL;Acc:A0A5K4F2U0]	schistosoma_mansoni_prjea36577	FERM domain-containing protein [Source:UniProtKB/TrEMBL;Acc:A0A5K4F2U0]			SM_V10_Z
0.515	0.0428905	0.03	0.061878	0.24	0.213	Muscle 1	Smp_163260	WW domain-binding protein 11	Source:UniProtKB/TrEMBL;Acc:A0A3Q0KRN8]	schistosoma_mansoni_prjea36577	WW domain-binding protein 11 [Source:UniProtKB/TrEMBL;Acc:A0A3Q0KRN8]			SM_V10_Z
0.515	0.0361704	0.03	0.0521828	0.14	0.111	Muscle 1	Smp_094760	Serine/threonine kinase	Source:UniProtKB/TrEMBL;Acc:G4VTU1]	schistosoma_mansoni_prjea36577	Serine/threonine kinase [Source:UniProtKB/TrEMBL;Acc:G4VTU1]			SM_V10_Z
0.515	0.052423	0.03	0.0756303	0.415	0.399	Muscle 1	Smp_095150	protein-synthesizing GTPase	Source:UniProtKB/TrEMBL;Acc:A0A3Q0KJF0]	schistosoma_mansoni_prjea36577	protein-synthesizing GTPase [Source:UniProtKB/TrEMBL;Acc:A0A3Q0KJF0]			SM_V10_Z
0.515	0.0317282	0.03	0.0457741	0.034	0.004	Muscle 1	Smp_171780	SPARC_Ca_bdg domain-containing protein	Source:UniProtKB/TrEMBL;Acc:A0A3Q0KSU7]	schistosoma_mansoni_prjea36577	SPARC_Ca_bdg domain-containing protein [Source:UniProtKB/TrEMBL;Acc:A0A3Q0KSU7]			SM_V10_Z
0.515	0.0350426	0.03	0.0505558	0.037	0.008	Muscle 1	Smp_153100	Putative potassium/sodium hyperpolarization-activated cyclic nucleotide-gated channel	Source:UniProtKB/TrEMBL;Acc:A0A3Q0KQ67]	schistosoma_mansoni_prjea36577	Putative potassium/sodium hyperpolarization-activated cyclic nucleotide-gated channel [Source:UniProtKB/TrEMBL;Acc:A0A3Q0KQ67]			SM_V10_7
0.515	0.0337618	0.03	0.048708	0.215	0.185	Muscle 1	Smp_332170	Smp_332170	Smp_332170~	schistosoma_mansoni_prjea36577				SM_V10_6
0.515	0.0313629	0.03	0.0452471	0.049	0.019	Muscle 1	Smp_314200	Dyp-type peroxidase	Source:UniProtKB/TrEMBL;Acc:A0A5K4F769]	schistosoma_mansoni_prjea36577	Dyp-type peroxidase [Source:UniProtKB/TrEMBL;Acc:A0A5K4F769]			SM_V10_5
0.515	0.0296693	0.03	0.0428038	0.057	0.027	Muscle 1	Smp_153810	asparaginase	Source:UniProtKB/TrEMBL;Acc:A0A3Q0KQB1]	schistosoma_mansoni_prjea36577	asparaginase [Source:UniProtKB/TrEMBL;Acc:A0A3Q0KQB1]			SM_V10_4
0.515	0.0443511	0.03	0.0639851	0.393	0.373	Muscle 1	Smp_313320	Mediator complex subunit 28	Source:UniProtKB/TrEMBL;Acc:A0A5K4F5B7]	schistosoma_mansoni_prjea36577	Mediator complex subunit 28 [Source:UniProtKB/TrEMBL;Acc:A0A5K4F5B7]			SM_V10_4
0.515	0.0276199	0.03	0.0398471	0.072	0.043	Muscle 1	Smp_301730	Short coiled-coil protein	Source:UniProtKB/TrEMBL;Acc:A0A5K4F3J3]	schistosoma_mansoni_prjea36577	Short coiled-coil protein [Source:UniProtKB/TrEMBL;Acc:A0A5K4F3J3]			SM_V10_4
0.515	0.0313523	0.03	0.0452319	0.062	0.032	Muscle 1	Smp_316340	DH domain-containing protein	Source:UniProtKB/TrEMBL;Acc:A0A5K4F409]	schistosoma_mansoni_prjea36577	DH domain-containing protein [Source:UniProtKB/TrEMBL;Acc:A0A5K4F409]			SM_V10_4
0.515	0.0402782	0.03	0.0581092	0.078	0.047	Muscle 1	Smp_346860	Smp_346860	Smp_346860~	schistosoma_mansoni_prjea36577				SM_V10_4
0.515	0.0449683	0.03	0.0648755	0.208	0.181	Muscle 1	Smp_084900	eIF-2B GDP-GTP exchange factor subunit alpha	Source:UniProtKB/TrEMBL;Acc:A0A3Q0KIJ4]	schistosoma_mansoni_prjea36577	eIF-2B GDP-GTP exchange factor subunit alpha [Source:UniProtKB/TrEMBL;Acc:A0A3Q0KIJ4]			SM_V10_3
0.515	0.029553	0.03	0.042636	0.031	0.002	Muscle 1	Smp_333900	Pecanex-like protein	Source:UniProtKB/TrEMBL;Acc:A0A5K4FCF0]	schistosoma_mansoni_prjea36577	Pecanex-like protein [Source:UniProtKB/TrEMBL;Acc:A0A5K4FCF0]			SM_V10_2
0.515	0.0312002	0.03	0.0450124	0.053	0.023	Muscle 1	Smp_245560	GAR domain-containing protein	Source:UniProtKB/TrEMBL;Acc:A0A5K4F250]	schistosoma_mansoni_prjea36577	GAR domain-containing protein [Source:UniProtKB/TrEMBL;Acc:A0A5K4F250]			SM_V10_2
0.515	0.0312368	0.03	0.0450651	0.032	0.002	Muscle 1	Smp_135040	Putative nicotinic acetylcholine receptor alpha 9b subunit	Source:UniProtKB/TrEMBL;Acc:A0A3Q0KMD6]	schistosoma_mansoni_prjea36577	Putative nicotinic acetylcholine receptor alpha 9b subunit [Source:UniProtKB/TrEMBL;Acc:A0A3Q0KMD6]			SM_V10_1
0.515	0.0397031	0.03	0.0572795	0.213	0.183	Muscle 1	Smp_079860	O-acyltransferase (Membrane bound) domain containing protein, putative	Source:UniProtKB/TrEMBL;Acc:G4M1H9]	schistosoma_mansoni_prjea36577	O-acyltransferase (Membrane bound) domain containing protein, putative [Source:UniProtKB/TrEMBL;Acc:G4M1H9]			SM_V10_1
0.515	0.0267724	0.03	0.0386244	0.073	0.043	Muscle 1	Smp_344870	Par3_HAL_N_term domain-containing protein	Source:UniProtKB/TrEMBL;Acc:A0A5K4FDE1]	schistosoma_mansoni_prjea36577	Par3_HAL_N_term domain-containing protein [Source:UniProtKB/TrEMBL;Acc:A0A5K4FDE1]			SM_V10_1
0.515	0.0490862	0.03	0.0708165	0.198	0.171	Muscle 1	Smp_083730	Ovule protein	Source:UniProtKB/TrEMBL;Acc:G4V6T7]	schistosoma_mansoni_prjea36577	Ovule protein [Source:UniProtKB/TrEMBL;Acc:G4V6T7]			SM_V10_1
0.515	0.043973	0.03	0.0634397	0.291	0.266	Muscle 1	Smp_124820	Putative chromosome region maintenance protein 1/exportin	Source:UniProtKB/TrEMBL;Acc:A0A3Q0KKU4]	schistosoma_mansoni_prjea36577	Putative chromosome region maintenance protein 1/exportin [Source:UniProtKB/TrEMBL;Acc:A0A3Q0KKU4]			SM_V10_1
0.515	0.0404373	0.03	0.0583387	0.471	0.453	Muscle 1	Smp_168080	C2H2-type domain-containing protein	Source:UniProtKB/TrEMBL;Acc:A0A3Q0KSE8]	schistosoma_mansoni_prjea36577	C2H2-type domain-containing protein [Source:UniProtKB/TrEMBL;Acc:A0A3Q0KSE8]			SM_V10_1
0.515	0.0331957	0.03	0.0478913	0.046	0.015	Muscle 1	Smp_173380	receptor protein-tyrosine kinase	Source:UniProtKB/TrEMBL;Acc:A0A3Q0KT67]	schistosoma_mansoni_prjea36577	receptor protein-tyrosine kinase [Source:UniProtKB/TrEMBL;Acc:A0A3Q0KT67]			SM_V10_1
0.515	0.0259762	0.03	0.0374758	0.112	0.081	Muscle 1	Smp_085830	Transmembrane protein	Source:UniProtKB/TrEMBL;Acc:A0A3Q0KIM4]	schistosoma_mansoni_prjea36577	Transmembrane protein [Source:UniProtKB/TrEMBL;Acc:A0A3Q0KIM4]			SM_V10_1
0.515	0.0302363	0.03	0.0436218	0.037	0.008	Muscle 1	Smp_319810	ATP-binding cassette sub-family A member 1	Source:UniProtKB/TrEMBL;Acc:A0A5K4F7C6]	schistosoma_mansoni_prjea36577	ATP-binding cassette sub-family A member 1 [Source:UniProtKB/TrEMBL;Acc:A0A5K4F7C6]			SM_V10_1
0.514	0.0467056	0.028	0.0673819	0.359	0.338	Muscle 1	Smp_324070	Succinate dehydrogenase, hydrophobic membrane anchor protein	Source:UniProtKB/TrEMBL;Acc:A0A5K4F7Q6]	schistosoma_mansoni_prjea36577	Succinate dehydrogenase, hydrophobic membrane anchor protein [Source:UniProtKB/TrEMBL;Acc:A0A5K4F7Q6]			SM_V10_Z
0.514	0.023264	0.028	0.0335628	0.116	0.088	Muscle 1	Smp_096240	Putative zinc finger protein	Source:UniProtKB/TrEMBL;Acc:G4VS44]	schistosoma_mansoni_prjea36577	Putative zinc finger protein [Source:UniProtKB/TrEMBL;Acc:G4VS44]			SM_V10_Z
0.514	0.0271491	0.028	0.0391679	0.096	0.068	Muscle 1	Smp_323650	Phosphatidylinositol N-acetylglucosaminyltransferase subunit C	Source:UniProtKB/TrEMBL;Acc:A0A5K4F1Q6]	schistosoma_mansoni_prjea36577	Phosphatidylinositol N-acetylglucosaminyltransferase subunit C [Source:UniProtKB/TrEMBL;Acc:A0A5K4F1Q6]			SM_V10_Z
0.514	0.0277912	0.028	0.0400943	0.043	0.016	Muscle 1	Smp_336650	SCHIP-1 domain-containing protein	Source:UniProtKB/TrEMBL;Acc:A0A5K4F8W8]	schistosoma_mansoni_prjea36577	SCHIP-1 domain-containing protein [Source:UniProtKB/TrEMBL;Acc:A0A5K4F8W8]			SM_V10_Z
0.514	0.0456008	0.028	0.065788	0.194	0.169	Muscle 1	Smp_047090	Elongator complex protein 6	Source:UniProtKB/TrEMBL;Acc:A0A5K4EEM8]	schistosoma_mansoni_prjea36577	Elongator complex protein 6 [Source:UniProtKB/TrEMBL;Acc:A0A5K4EEM8]			SM_V10_Z
0.514	0.0305099	0.028	0.0440165	0.038	0.009	Muscle 1	Smp_172810	Putative rhodopsin-like orphan GPCR	Source:UniProtKB/TrEMBL;Acc:A0A3Q0KT31]	schistosoma_mansoni_prjea36577	Putative rhodopsin-like orphan GPCR [Source:UniProtKB/TrEMBL;Acc:A0A3Q0KT31]			SM_V10_Z
0.514	0.0332536	0.028	0.0479748	0.329	0.305	Muscle 1	Smp_033050	DNA topoisomerase I	Source:UniProtKB/TrEMBL;Acc:A0A3Q0KE80]	schistosoma_mansoni_prjea36577	DNA topoisomerase I [Source:UniProtKB/TrEMBL;Acc:A0A3Q0KE80]			SM_V10_Z
0.514	0.0516339	0.028	0.0744921	0.335	0.318	Muscle 1	Smp_059290	Putative dual-specificity phosphatase	Source:UniProtKB/TrEMBL;Acc:G4VR74]	schistosoma_mansoni_prjea36577	Putative dual-specificity phosphatase [Source:UniProtKB/TrEMBL;Acc:G4VR74]			SM_V10_Z
0.514	0.0393451	0.028	0.056763	0.561	0.553	Muscle 1	Smp_126370	RPB5 homolog	Source:UniProtKB/TrEMBL;Acc:G4VPW8]	schistosoma_mansoni_prjea36577	RPB5 homolog [Source:UniProtKB/TrEMBL;Acc:G4VPW8]			SM_V10_Z
0.514	0.0500463	0.028	0.0722016	0.398	0.388	Muscle 1	Smp_175810	39S ribosomal protein L40, mitochondrial	Source:UniProtKB/TrEMBL;Acc:A0A3Q0KTI5]	schistosoma_mansoni_prjea36577	39S ribosomal protein L40, mitochondrial [Source:UniProtKB/TrEMBL;Acc:A0A3Q0KTI5]			SM_V10_7
0.514	0.032691	0.028	0.0471631	0.818	0.847	Muscle 1	Smp_033400	Cytochrome c-like protein; Putative cytochrome c	Source:UniProtKB/TrEMBL;Acc:A0A3Q0KE61]	schistosoma_mansoni_prjea36577	Cytochrome c-like protein; Putative cytochrome c [Source:UniProtKB/TrEMBL;Acc:A0A3Q0KE61]			SM_V10_7
0.514	0.0256365	0.028	0.0369856	0.068	0.041	Muscle 1	Smp_147000	Putative syntenin-2 (Syndecan-binding protein 2)	Source:UniProtKB/TrEMBL;Acc:G4VKT1]	schistosoma_mansoni_prjea36577	Putative syntenin-2 (Syndecan-binding protein 2) [Source:UniProtKB/TrEMBL;Acc:G4VKT1]			SM_V10_6
0.514	0.0318006	0.028	0.0458786	0.049	0.022	Muscle 1	Smp_169730	Fascin, putative	Source:UniProtKB/TrEMBL;Acc:C4QKQ7]	schistosoma_mansoni_prjea36577	Fascin, putative [Source:UniProtKB/TrEMBL;Acc:C4QKQ7]			SM_V10_6
0.514	0.0348388	0.028	0.0502618	0.146	0.119	Muscle 1	Smp_331200	HAMP domain-containing protein	Source:UniProtKB/TrEMBL;Acc:A0A5K4F9F2]	schistosoma_mansoni_prjea36577	HAMP domain-containing protein [Source:UniProtKB/TrEMBL;Acc:A0A5K4F9F2]			SM_V10_6
0.514	0.0285437	0.028	0.0411798	0.052	0.024	Muscle 1	Smp_062070	Sulfide quinone reductase, putative	Source:UniProtKB/TrEMBL;Acc:A0A3Q0KGN3]	schistosoma_mansoni_prjea36577	Sulfide quinone reductase, putative [Source:UniProtKB/TrEMBL;Acc:A0A3Q0KGN3]			SM_V10_6
0.514	0.0298239	0.028	0.0430268	0.137	0.11	Muscle 1	Smp_344710	Alpha-taxilin	Source:UniProtKB/TrEMBL;Acc:A0A5K4FFQ3]	schistosoma_mansoni_prjea36577	Alpha-taxilin [Source:UniProtKB/TrEMBL;Acc:A0A5K4FFQ3]			SM_V10_5
0.514	0.0268375	0.028	0.0387183	0.078	0.049	Muscle 1	Smp_051930	Putative beta1,3-galactosyltransferase	Source:UniProtKB/TrEMBL;Acc:A0A3Q0KFV2]	schistosoma_mansoni_prjea36577	Putative beta1,3-galactosyltransferase [Source:UniProtKB/TrEMBL;Acc:A0A3Q0KFV2]			SM_V10_4
0.514	0.0343817	0.028	0.0496023	0.556	0.54	Muscle 1	Smp_036940	Sec61 gamma subunit, putative	Source:UniProtKB/TrEMBL;Acc:G4M1B5]	schistosoma_mansoni_prjea36577	Sec61 gamma subunit, putative [Source:UniProtKB/TrEMBL;Acc:G4M1B5]			SM_V10_4
0.514	0.0305687	0.028	0.0441013	0.036	0.008	Muscle 1	Smp_342860	Voltage-gated hydrogen channel 1	Source:UniProtKB/TrEMBL;Acc:A0A5K4FDJ5]	schistosoma_mansoni_prjea36577	Voltage-gated hydrogen channel 1 [Source:UniProtKB/TrEMBL;Acc:A0A5K4FDJ5]			SM_V10_3
0.514	0.0256082	0.028	0.0369449	0.165	0.137	Muscle 1	Smp_169690	Coatomer subunit epsilon	Source:UniProtKB/TrEMBL;Acc:G4VG55]	schistosoma_mansoni_prjea36577	Coatomer subunit epsilon [Source:UniProtKB/TrEMBL;Acc:G4VG55]			SM_V10_3
0.514	0.0282847	0.028	0.0408062	0.059	0.032	Muscle 1	Smp_165170	Putative transient receptor potential cation channel,subfamily m, member	Source:UniProtKB/TrEMBL;Acc:A0A3Q0KRY5]	schistosoma_mansoni_prjea36577	Putative transient receptor potential cation channel,subfamily m, member [Source:UniProtKB/TrEMBL;Acc:A0A3Q0KRY5]			SM_V10_3
0.514	0.0297434	0.028	0.0429107	0.043	0.014	Muscle 1	Smp_129380	Putative voltage-gated potassium channel	Source:UniProtKB/TrEMBL;Acc:A0A3Q0KLI3]	schistosoma_mansoni_prjea36577	Putative voltage-gated potassium channel [Source:UniProtKB/TrEMBL;Acc:A0A3Q0KLI3]			SM_V10_3
0.514	0.0306648	0.028	0.0442399	0.036	0.008	Muscle 1	Smp_174810	Cu/zn superoxide dismutase,putative	Source:UniProtKB/TrEMBL;Acc:A0A3Q0KTB6]	schistosoma_mansoni_prjea36577	Cu/zn superoxide dismutase,putative [Source:UniProtKB/TrEMBL;Acc:A0A3Q0KTB6]			SM_V10_3
0.514	0.0284388	0.028	0.0410285	0.032	0.005	Muscle 1	Smp_163450	Tubulin tyrosine ligase-related	Source:UniProtKB/TrEMBL;Acc:A0A3Q0KRK4]	schistosoma_mansoni_prjea36577	Tubulin tyrosine ligase-related [Source:UniProtKB/TrEMBL;Acc:A0A3Q0KRK4]			SM_V10_3
0.514	0.0274389	0.028	0.039586	0.085	0.057	Muscle 1	Smp_150500	Putative recs1 protein (Responsive to centrifugal force and shear stressprotein 1 protein)	Source:UniProtKB/TrEMBL;Acc:A0A3Q0KPN6]	schistosoma_mansoni_prjea36577	Putative recs1 protein (Responsive to centrifugal force and shear stressprotein 1 protein) [Source:UniProtKB/TrEMBL;Acc:A0A3Q0KPN6]			SM_V10_3
0.514	0.029551	0.028	0.0426331	0.032	0.004	Muscle 1	Smp_167470	Protocadherin gamma, putative	Source:UniProtKB/TrEMBL;Acc:A0A3Q0KS71]	schistosoma_mansoni_prjea36577	Protocadherin gamma, putative [Source:UniProtKB/TrEMBL;Acc:A0A3Q0KS71]			SM_V10_3
0.514	0.026436	0.028	0.038139	0.058	0.031	Muscle 1	Smp_130080	Putative ankrd45 protein	Source:UniProtKB/TrEMBL;Acc:G4VBT8]	schistosoma_mansoni_prjea36577	Putative ankrd45 protein [Source:UniProtKB/TrEMBL;Acc:G4VBT8]			SM_V10_2
0.514	0.0310359	0.028	0.0447754	0.067	0.039	Muscle 1	Smp_123000	Putative sno and ski oncogene family	Source:UniProtKB/TrEMBL;Acc:G4VCH5]	schistosoma_mansoni_prjea36577	Putative sno and ski oncogene family [Source:UniProtKB/TrEMBL;Acc:G4VCH5]			SM_V10_2
0.514	0.0275346	0.028	0.0397241	0.066	0.038	Muscle 1	Smp_171120	Putative udp-galactose transporter	Source:UniProtKB/TrEMBL;Acc:A0A3Q0KSV0]	schistosoma_mansoni_prjea36577	Putative udp-galactose transporter [Source:UniProtKB/TrEMBL;Acc:A0A3Q0KSV0]			SM_V10_2
0.514	0.0291958	0.028	0.0421207	0.04	0.011	Muscle 1	Smp_125480	PDZ domain-containing protein	Source:UniProtKB/TrEMBL;Acc:A0A3Q0KKX8]	schistosoma_mansoni_prjea36577	PDZ domain-containing protein [Source:UniProtKB/TrEMBL;Acc:A0A3Q0KKX8]			SM_V10_2
0.514	0.0274707	0.028	0.0396318	0.038	0.011	Muscle 1	Smp_157950	Glycogenin-related	Source:UniProtKB/TrEMBL;Acc:A0A3Q0KQX0]	schistosoma_mansoni_prjea36577	Glycogenin-related [Source:UniProtKB/TrEMBL;Acc:A0A3Q0KQX0]			SM_V10_2
0.514	0.0420542	0.028	0.0606714	0.219	0.194	Muscle 1	Smp_144200	Protein N-terminal glutamine amidohydrolase	Source:UniProtKB/TrEMBL;Acc:A0A3Q0KNT5]	schistosoma_mansoni_prjea36577	Protein N-terminal glutamine amidohydrolase [Source:UniProtKB/TrEMBL;Acc:A0A3Q0KNT5]			SM_V10_1
0.514	0.0278705	0.028	0.0402087	0.035	0.008	Muscle 1	Smp_154760	Egf-like domain protein	Source:UniProtKB/TrEMBL;Acc:A0A5K4ESF0]	schistosoma_mansoni_prjea36577	Egf-like domain protein [Source:UniProtKB/TrEMBL;Acc:A0A5K4ESF0]			SM_V10_1
0.514	0.0279078	0.028	0.0402624	0.124	0.096	Muscle 1	Smp_071140	Adducin related protein	Source:UniProtKB/TrEMBL;Acc:G4V7X9]	schistosoma_mansoni_prjea36577	Adducin related protein [Source:UniProtKB/TrEMBL;Acc:G4V7X9]			SM_V10_1
0.514	0.0446483	0.028	0.0644138	0.274	0.252	Muscle 1	Smp_083030	Putative inhibitor of apoptosis (Iap) domain family member	Source:UniProtKB/TrEMBL;Acc:G4V774]	schistosoma_mansoni_prjea36577	Putative inhibitor of apoptosis (Iap) domain family member [Source:UniProtKB/TrEMBL;Acc:G4V774]			SM_V10_1
0.514	0.0287605	0.028	0.0414927	0.135	0.106	Muscle 1	Smp_144560	Putative nucleobindin	Source:UniProtKB/TrEMBL;Acc:A0A3Q0KNY1]	schistosoma_mansoni_prjea36577	Putative nucleobindin [Source:UniProtKB/TrEMBL;Acc:A0A3Q0KNY1]			SM_V10_1
0.514	0.0268094	0.028	0.0386778	0.197	0.167	Muscle 1	Smp_067140	Putative rab9 and	Source:UniProtKB/TrEMBL;Acc:G4V6R4]	schistosoma_mansoni_prjea36577	Putative rab9 and [Source:UniProtKB/TrEMBL;Acc:G4V6R4]			SM_V10_1
0.514	0.0291443	0.028	0.0420463	0.096	0.067	Muscle 1	Smp_028070	Bicaudal D-like protein	Source:UniProtKB/TrEMBL;Acc:G4V630]	schistosoma_mansoni_prjea36577	Bicaudal D-like protein [Source:UniProtKB/TrEMBL;Acc:G4V630]			SM_V10_1
0.514	0.0471208	0.028	0.067981	0.298	0.278	Muscle 1	Smp_173840	26S proteasome subunit ATPase 4	Source:UniProtKB/TrEMBL;Acc:A9NI53]	schistosoma_mansoni_prjea36577	26S proteasome subunit ATPase 4 [Source:UniProtKB/TrEMBL;Acc:A9NI53]	RPT4	UniProtKB Gene Name	SM_V10_1
0.514	0.0287583	0.028	0.0414894	0.033	0.005	Muscle 1	Smp_126050	Putative cadherin	Source:UniProtKB/TrEMBL;Acc:A0A3Q0KKX0]	schistosoma_mansoni_prjea36577	Putative cadherin [Source:UniProtKB/TrEMBL;Acc:A0A3Q0KKX0]			SM_V10_1
0.514	0.0299456	0.028	0.0432024	0.095	0.066	Muscle 1	Smp_158320	Putative glypican	Source:UniProtKB/TrEMBL;Acc:A0A3Q0KR85]	schistosoma_mansoni_prjea36577	Putative glypican [Source:UniProtKB/TrEMBL;Acc:A0A3Q0KR85]			SM_V10_1
0.514	0.0215676	0.028	0.0311155	0.103	0.075	Muscle 1	Smp_052640	C2H2-type domain-containing protein	Source:UniProtKB/TrEMBL;Acc:A0A3Q0KFY1]	schistosoma_mansoni_prjea36577	C2H2-type domain-containing protein [Source:UniProtKB/TrEMBL;Acc:A0A3Q0KFY1]			SM_V10_1
0.514	0.0284498	0.028	0.0410444	0.101	0.073	Muscle 1	Smp_093230	Actin-related protein 10, arp10	Source:UniProtKB/TrEMBL;Acc:G4V8Q5]	schistosoma_mansoni_prjea36577	Actin-related protein 10, arp10 [Source:UniProtKB/TrEMBL;Acc:G4V8Q5]			SM_V10_1
0.514	0.0481191	0.028	0.0694212	0.334	0.319	Muscle 1	Smp_086590	Putative actin-depolymerizing factor	Source:UniProtKB/TrEMBL;Acc:G4VGX1]	schistosoma_mansoni_prjea36577	Putative actin-depolymerizing factor [Source:UniProtKB/TrEMBL;Acc:G4VGX1]			SM_V10_1
0.514	0.034624	0.028	0.0499519	0.131	0.105	Muscle 1	Smp_129590	RPAP1_C domain-containing protein	Source:UniProtKB/TrEMBL;Acc:A0A3Q0KLG4]	schistosoma_mansoni_prjea36577	RPAP1_C domain-containing protein [Source:UniProtKB/TrEMBL;Acc:A0A3Q0KLG4]			SM_V10_1
0.514	0.028272	0.028	0.0407878	0.038	0.01	Muscle 1	Smp_055440	MAM domain-containing protein	Source:UniProtKB/TrEMBL;Acc:A0A3Q0KG68]	schistosoma_mansoni_prjea36577	MAM domain-containing protein [Source:UniProtKB/TrEMBL;Acc:A0A3Q0KG68]			SM_V10_1
0.513	0.0299627	0.026	0.0432271	0.048	0.021	Muscle 1	Smp_307270	Innexin	Source:UniProtKB/TrEMBL;Acc:A0A5K4F4B6]	schistosoma_mansoni_prjea36577	Innexin [Source:UniProtKB/TrEMBL;Acc:A0A5K4F4B6]	inx	UniProtKB Gene Name	SM_V10_Z
0.513	0.0262461	0.026	0.0378651	0.087	0.061	Muscle 1	Smp_044680	HTH La-type RNA-binding domain-containing protein	Source:UniProtKB/TrEMBL;Acc:A0A3Q0KF80]	schistosoma_mansoni_prjea36577	HTH La-type RNA-binding domain-containing protein [Source:UniProtKB/TrEMBL;Acc:A0A3Q0KF80]			SM_V10_Z
0.513	0.0267682	0.026	0.0386183	0.067	0.041	Muscle 1	Smp_173730	Protein shisa-5	Source:UniProtKB/TrEMBL;Acc:A0A3Q0KT69]	schistosoma_mansoni_prjea36577	Protein shisa-5 [Source:UniProtKB/TrEMBL;Acc:A0A3Q0KT69]			SM_V10_Z
0.513	0.0252277	0.026	0.0363959	0.13	0.102	Muscle 1	Smp_068480	Putative vesicle transport V-snare protein vti1a	Source:UniProtKB/TrEMBL;Acc:A0A3Q0KH96]	schistosoma_mansoni_prjea36577	Putative vesicle transport V-snare protein vti1a [Source:UniProtKB/TrEMBL;Acc:A0A3Q0KH96]			SM_V10_Z
0.513	0.0260964	0.026	0.0376492	0.061	0.035	Muscle 1	Smp_241450	Smp_241450	Smp_241450~	schistosoma_mansoni_prjea36577				SM_V10_Z
0.513	0.0349258	0.026	0.0503872	0.478	0.459	Muscle 1	Smp_047060	NADH dehydrogenase	ubiquinone] 1 beta subcomplex subunit 9	schistosoma_mansoni_prjea36577	NADH dehydrogenase [ubiquinone] 1 beta subcomplex subunit 9 [Source:UniProtKB/TrEMBL;Acc:G4VNA0]			SM_V10_Z
0.513	0.0270216	0.026	0.0389839	0.031	0.005	Muscle 1	Smp_096410	Putative calmodulin; Similar to 16 kDa calcium-binding protein	Source:UniProtKB/TrEMBL;Acc:A0A3Q0KJG4]	schistosoma_mansoni_prjea36577	Putative calmodulin; Similar to 16 kDa calcium-binding protein [Source:UniProtKB/TrEMBL;Acc:A0A3Q0KJG4]			SM_V10_Z
0.513	0.0233497	0.026	0.0336866	0.055	0.029	Muscle 1	Smp_104730	Putative dnaj homolog subfamily B member 4	Source:UniProtKB/TrEMBL;Acc:A0A3Q0KK22]	schistosoma_mansoni_prjea36577	Putative dnaj homolog subfamily B member 4 [Source:UniProtKB/TrEMBL;Acc:A0A3Q0KK22]			SM_V10_Z
0.513	0.0205907	0.026	0.0297062	0.074	0.049	Muscle 1	Smp_245370	Equilibrative nucleoside transporter 3	Source:UniProtKB/TrEMBL;Acc:A0A5K4F1R9]	schistosoma_mansoni_prjea36577	Equilibrative nucleoside transporter 3 [Source:UniProtKB/TrEMBL;Acc:A0A5K4F1R9]			SM_V10_Z
0.513	0.0256486	0.026	0.0370031	0.056	0.029	Muscle 1	Smp_028360	Tubulin epsilon chain, putative	Source:UniProtKB/TrEMBL;Acc:A0A3Q0KDS4]	schistosoma_mansoni_prjea36577	Tubulin epsilon chain, putative [Source:UniProtKB/TrEMBL;Acc:A0A3Q0KDS4]			SM_V10_Z
0.513	0.0189053	0.026	0.0272746	0.066	0.041	Muscle 1	Smp_098300	C2H2-type domain-containing protein	Source:UniProtKB/TrEMBL;Acc:A0A3Q0KJL1]	schistosoma_mansoni_prjea36577	C2H2-type domain-containing protein [Source:UniProtKB/TrEMBL;Acc:A0A3Q0KJL1]			SM_V10_Z
0.513	0.0334731	0.026	0.0482915	0.067	0.041	Muscle 1	Smp_023010	ATPase inhibitor-like protein trans-spliced	Source:UniProtKB/TrEMBL;Acc:Q26549]	schistosoma_mansoni_prjea36577	ATPase inhibitor-like protein trans-spliced [Source:UniProtKB/TrEMBL;Acc:Q26549]			SM_V10_7
0.513	0.0250233	0.026	0.0361009	0.095	0.068	Muscle 1	Smp_127920	Serine/threonine kinase	Source:UniProtKB/TrEMBL;Acc:A0A3Q0KL97]	schistosoma_mansoni_prjea36577	Serine/threonine kinase [Source:UniProtKB/TrEMBL;Acc:A0A3Q0KL97]			SM_V10_7
0.513	0.0378654	0.026	0.0546283	0.19	0.168	Muscle 1	Smp_036390	Putative craniofacial development protein (Bcnt)	Source:UniProtKB/TrEMBL;Acc:G4VLV1]	schistosoma_mansoni_prjea36577	Putative craniofacial development protein (Bcnt) [Source:UniProtKB/TrEMBL;Acc:G4VLV1]			SM_V10_6
0.513	0.0228118	0.026	0.0329104	0.161	0.134	Muscle 1	Smp_067490	Programmed cell death protein, putative	Source:UniProtKB/TrEMBL;Acc:A0A3Q0KH72]	schistosoma_mansoni_prjea36577	Programmed cell death protein, putative [Source:UniProtKB/TrEMBL;Acc:A0A3Q0KH72]			SM_V10_6
0.513	0.0293926	0.026	0.0424045	0.082	0.056	Muscle 1	Smp_039160	IMD domain-containing protein	Source:UniProtKB/TrEMBL;Acc:A0A3Q0KEQ4]	schistosoma_mansoni_prjea36577	IMD domain-containing protein [Source:UniProtKB/TrEMBL;Acc:A0A3Q0KEQ4]			SM_V10_5
0.513	0.0287464	0.026	0.0414723	0.028	0.001	Muscle 1	Smp_334480	SAM domain-containing protein	Source:UniProtKB/TrEMBL;Acc:A0A5K4FCP3]	schistosoma_mansoni_prjea36577	SAM domain-containing protein [Source:UniProtKB/TrEMBL;Acc:A0A5K4FCP3]			SM_V10_5
0.513	0.0280598	0.026	0.0404817	0.136	0.109	Muscle 1	Smp_153920	Putative cyclin G2	Source:UniProtKB/TrEMBL;Acc:G4VJ37]	schistosoma_mansoni_prjea36577	Putative cyclin G2 [Source:UniProtKB/TrEMBL;Acc:G4VJ37]			SM_V10_4
0.513	0.0232488	0.026	0.033541	0.042	0.017	Muscle 1	Smp_145360	Mitochondria-eating protein	Source:UniProtKB/TrEMBL;Acc:G4VIU4]	schistosoma_mansoni_prjea36577	Mitochondria-eating protein [Source:UniProtKB/TrEMBL;Acc:G4VIU4]			SM_V10_4
0.513	0.0232129	0.026	0.0334892	0.094	0.068	Muscle 1	Smp_312770	Ras family protein	Source:UniProtKB/TrEMBL;Acc:A0A5K4F3V1]	schistosoma_mansoni_prjea36577	Ras family protein [Source:UniProtKB/TrEMBL;Acc:A0A5K4F3V1]			SM_V10_4
0.513	0.0320037	0.026	0.0461716	0.12	0.093	Muscle 1	Smp_334060	LTD domain-containing protein	Source:UniProtKB/TrEMBL;Acc:A0A5K4FB57]	schistosoma_mansoni_prjea36577	LTD domain-containing protein [Source:UniProtKB/TrEMBL;Acc:A0A5K4FB57]			SM_V10_4
0.513	0.031764	0.026	0.0458258	0.114	0.087	Muscle 1	Smp_198190	Engulfment and cell motility, putative	Source:UniProtKB/TrEMBL;Acc:A0A3Q0KUZ5]	schistosoma_mansoni_prjea36577	Engulfment and cell motility, putative [Source:UniProtKB/TrEMBL;Acc:A0A3Q0KUZ5]			SM_V10_4
0.513	0.0345333	0.026	0.0498211	0.148	0.124	Muscle 1	Smp_007890	DNA-directed RNA polymerase III subunit RPC9	Source:UniProtKB/TrEMBL;Acc:G4V5P7]	schistosoma_mansoni_prjea36577	DNA-directed RNA polymerase III subunit RPC9 [Source:UniProtKB/TrEMBL;Acc:G4V5P7]			SM_V10_3
0.513	0.0222668	0.026	0.0321241	0.063	0.036	Muscle 1	Smp_179360	Sortilin	Source:UniProtKB/TrEMBL;Acc:A0A3Q0KU73]	schistosoma_mansoni_prjea36577	Sortilin [Source:UniProtKB/TrEMBL;Acc:A0A3Q0KU73]			SM_V10_3
0.513	0.029145	0.026	0.0420473	0.108	0.083	Muscle 1	Smp_087620	Putative programmed cell death 6-interacting protein	Source:UniProtKB/TrEMBL;Acc:A0A3Q0KIV9]	schistosoma_mansoni_prjea36577	Putative programmed cell death 6-interacting protein [Source:UniProtKB/TrEMBL;Acc:A0A3Q0KIV9]			SM_V10_3
0.513	0.0300095	0.026	0.0432946	0.139	0.113	Muscle 1	Smp_084400	Sporulation protein rmd5-related (Glucose-induced degradation protein 2)	Source:UniProtKB/TrEMBL;Acc:A0A3Q0KIM3]	schistosoma_mansoni_prjea36577	Sporulation protein rmd5-related (Glucose-induced degradation protein 2) [Source:UniProtKB/TrEMBL;Acc:A0A3Q0KIM3]			SM_V10_3
0.513	0.026895	0.026	0.0388013	0.073	0.047	Muscle 1	Smp_074080	Mitogen-activated protein kinase	Source:UniProtKB/TrEMBL;Acc:A0A3Q0KHS1]	schistosoma_mansoni_prjea36577	Mitogen-activated protein kinase [Source:UniProtKB/TrEMBL;Acc:A0A3Q0KHS1]			SM_V10_3
0.513	0.0206288	0.026	0.029761	0.096	0.07	Muscle 1	Smp_267170	Ras-related protein Rab-4A	Source:UniProtKB/TrEMBL;Acc:A0A146MI69]	schistosoma_mansoni_prjea36577	Ras-related protein Rab-4A [Source:UniProtKB/TrEMBL;Acc:A0A146MI69]			SM_V10_3
0.513	0.00757927	0.026	0.0109346	0.521	0.484	Muscle 1	Smp_104580	Ribulose-phosphate 3-epimerase	Source:UniProtKB/TrEMBL;Acc:G4VE51]	schistosoma_mansoni_prjea36577	Ribulose-phosphate 3-epimerase [Source:UniProtKB/TrEMBL;Acc:G4VE51]			SM_V10_2
0.513	0.017344	0.026	0.0250221	0.171	0.142	Muscle 1	Smp_034400	Adaptor-related protein complex	Source:UniProtKB/TrEMBL;Acc:A0A3Q0KEB0]	schistosoma_mansoni_prjea36577	Adaptor-related protein complex [Source:UniProtKB/TrEMBL;Acc:A0A3Q0KEB0]			SM_V10_2
0.513	0.0146083	0.026	0.0210754	0.097	0.069	Muscle 1	Smp_146120	Phosphodiesterase	Source:UniProtKB/TrEMBL;Acc:A0A3Q0KP42]	schistosoma_mansoni_prjea36577	Phosphodiesterase [Source:UniProtKB/TrEMBL;Acc:A0A3Q0KP42]	PDE9B	UniProtKB Gene Name	SM_V10_2
0.513	0.0275561	0.026	0.0397551	0.04	0.014	Muscle 1	Smp_191310	Putative histone deacetylase 4, 5	Source:UniProtKB/TrEMBL;Acc:A0A3Q0KU90]	schistosoma_mansoni_prjea36577	Putative histone deacetylase 4, 5 [Source:UniProtKB/TrEMBL;Acc:A0A3Q0KU90]			SM_V10_2
0.513	0.0178934	0.026	0.0258147	0.18	0.152	Muscle 1	Smp_043990	Basigin	Source:UniProtKB/TrEMBL;Acc:G4VD39]	schistosoma_mansoni_prjea36577	Basigin [Source:UniProtKB/TrEMBL;Acc:G4VD39]			SM_V10_1
0.513	0.0272408	0.026	0.0393001	0.029	0.003	Muscle 1	Smp_342110	Ras-like protein family member 12	Source:UniProtKB/TrEMBL;Acc:A0A5K4FCD2]	schistosoma_mansoni_prjea36577	Ras-like protein family member 12 [Source:UniProtKB/TrEMBL;Acc:A0A5K4FCD2]			SM_V10_1
0.513	0.0274124	0.026	0.0395477	0.088	0.063	Muscle 1	Smp_079700	Putative ga binding protein beta chain (Transcription factor e4tf1-47)	Source:UniProtKB/TrEMBL;Acc:G4V7V8]	schistosoma_mansoni_prjea36577	Putative ga binding protein beta chain (Transcription factor e4tf1-47) [Source:UniProtKB/TrEMBL;Acc:G4V7V8]			SM_V10_1
0.513	0.0342692	0.026	0.04944	0.351	0.328	Muscle 1	Smp_319500	Protein E5	Source:UniProtKB/TrEMBL;Acc:A0A5K4F8K2]	schistosoma_mansoni_prjea36577	Protein E5 [Source:UniProtKB/TrEMBL;Acc:A0A5K4F8K2]			SM_V10_1
0.513	0.0276219	0.026	0.03985	0.036	0.009	Muscle 1	Smp_037780	Lipase	Source:UniProtKB/TrEMBL;Acc:G4V647]	schistosoma_mansoni_prjea36577	Lipase [Source:UniProtKB/TrEMBL;Acc:G4V647]			SM_V10_1
0.513	0.018852	0.026	0.0271977	0.151	0.124	Muscle 1	Smp_343540	Putative talin	Source:UniProtKB/TrEMBL;Acc:A0A5K4FCV3]	schistosoma_mansoni_prjea36577	Putative talin [Source:UniProtKB/TrEMBL;Acc:A0A5K4FCV3]			SM_V10_1
0.513	0.025521	0.026	0.036819	0.151	0.125	Muscle 1	Smp_127440	Smp_127440	Source:UniProtKB/TrEMBL;Acc:A0A5K4ELX8]	schistosoma_mansoni_prjea36577	Smp_127440 [Source:UniProtKB/TrEMBL;Acc:A0A5K4ELX8]			SM_V10_1
0.513	0.0282166	0.026	0.040708	0.035	0.01	Muscle 1	Smp_073280	Smp_073280	Smp_073280~	schistosoma_mansoni_prjea36577				SM_V10_1
0.513	0.0328022	0.026	0.0473236	0.146	0.122	Muscle 1	Smp_012540	U3 small nucleolar RNA-associated protein 23	Source:UniProtKB/TrEMBL;Acc:G4V975]	schistosoma_mansoni_prjea36577	U3 small nucleolar RNA-associated protein 23 [Source:UniProtKB/TrEMBL;Acc:G4V975]			SM_V10_1
0.513	0.0270511	0.026	0.0390265	0.117	0.092	Muscle 1	Smp_133270	Sel-1-like protein, sel-1l	Source:UniProtKB/TrEMBL;Acc:A0A3Q0KM41]	schistosoma_mansoni_prjea36577	Sel-1-like protein, sel-1l [Source:UniProtKB/TrEMBL;Acc:A0A3Q0KM41]			SM_V10_1
0.513	0.0262808	0.026	0.0379151	0.029	0.004	Muscle 1	Smp_163570	Ryanodine receptor related	Source:UniProtKB/TrEMBL;Acc:A0A3Q0KS03]	schistosoma_mansoni_prjea36577	Ryanodine receptor related [Source:UniProtKB/TrEMBL;Acc:A0A3Q0KS03]			SM_V10_1
0.512	0.0194621	0.024	0.0280778	0.059	0.035	Muscle 1	Smp_162910	glycerophosphocholine phosphodiesterase	Source:UniProtKB/TrEMBL;Acc:A0A3Q0KRM7]	schistosoma_mansoni_prjea36577	glycerophosphocholine phosphodiesterase [Source:UniProtKB/TrEMBL;Acc:A0A3Q0KRM7]			SM_V10_Z
0.512	0.0265128	0.024	0.0382499	0.129	0.106	Muscle 1	Smp_061250	Mitochondrial carrier protein, putative	Source:UniProtKB/TrEMBL;Acc:A0A3Q0KGN7]	schistosoma_mansoni_prjea36577	Mitochondrial carrier protein, putative [Source:UniProtKB/TrEMBL;Acc:A0A3Q0KGN7]			SM_V10_Z
0.512	0.0243125	0.024	0.0350755	0.102	0.077	Muscle 1	Smp_130600	RBR-type E3 ubiquitin transferase	Source:UniProtKB/TrEMBL;Acc:A0A5K4ELS0]	schistosoma_mansoni_prjea36577	RBR-type E3 ubiquitin transferase [Source:UniProtKB/TrEMBL;Acc:A0A5K4ELS0]			SM_V10_Z
0.512	0.0229673	0.024	0.0331347	0.05	0.026	Muscle 1	Smp_244250	Solute carrier family 12 member 6	Source:UniProtKB/TrEMBL;Acc:A0A5K4F357]	schistosoma_mansoni_prjea36577	Solute carrier family 12 member 6 [Source:UniProtKB/TrEMBL;Acc:A0A5K4F357]			SM_V10_Z
0.512	0.0255824	0.024	0.0369076	0.106	0.083	Muscle 1	Smp_180040	Phosphoglycerate mutase	Source:UniProtKB/TrEMBL;Acc:G4VRA6]	schistosoma_mansoni_prjea36577	Phosphoglycerate mutase [Source:UniProtKB/TrEMBL;Acc:G4VRA6]			SM_V10_Z
0.512	0.0177735	0.024	0.0256418	0.078	0.054	Muscle 1	Smp_194610	Serine/threonine kinase	Source:UniProtKB/TrEMBL;Acc:A0A3Q0KUQ9]	schistosoma_mansoni_prjea36577	Serine/threonine kinase [Source:UniProtKB/TrEMBL;Acc:A0A3Q0KUQ9]			SM_V10_Z
0.512	0.023856	0.024	0.0344169	0.038	0.013	Muscle 1	Smp_244310	Otopetrin	Source:UniProtKB/TrEMBL;Acc:A0A5K4F1D5]	schistosoma_mansoni_prjea36577	Otopetrin [Source:UniProtKB/TrEMBL;Acc:A0A5K4F1D5]			SM_V10_Z
0.512	0.02332	0.024	0.0336436	0.059	0.035	Muscle 1	Smp_025360	F-box domain-containing protein	Source:UniProtKB/TrEMBL;Acc:G4VPE3]	schistosoma_mansoni_prjea36577	F-box domain-containing protein [Source:UniProtKB/TrEMBL;Acc:G4VPE3]			SM_V10_Z
0.512	0.023349	0.024	0.0336855	0.094	0.071	Muscle 1	Smp_058270	Putative amiloride-sensitive sodium channel	Source:UniProtKB/TrEMBL;Acc:A0A3Q0KGD7]	schistosoma_mansoni_prjea36577	Putative amiloride-sensitive sodium channel [Source:UniProtKB/TrEMBL;Acc:A0A3Q0KGD7]			SM_V10_Z
0.512	0.0242113	0.024	0.0349295	0.033	0.008	Muscle 1	Smp_143130	Putative four and A half lim domains	Source:UniProtKB/TrEMBL;Acc:A0A3Q0KNU4]	schistosoma_mansoni_prjea36577	Putative four and A half lim domains [Source:UniProtKB/TrEMBL;Acc:A0A3Q0KNU4]			SM_V10_Z
0.512	0.0288365	0.024	0.0416023	0.076	0.053	Muscle 1	Smp_302920	ULP_PROTEASE domain-containing protein	Source:UniProtKB/TrEMBL;Acc:A0A5K4F281]	schistosoma_mansoni_prjea36577	ULP_PROTEASE domain-containing protein [Source:UniProtKB/TrEMBL;Acc:A0A5K4F281]			SM_V10_Z
0.512	0.0290753	0.024	0.0419467	0.345	0.327	Muscle 1	Smp_019730	NADH dehydrogenase	ubiquinone] 1 alpha subcomplex subunit 7	schistosoma_mansoni_prjea36577	NADH dehydrogenase [ubiquinone] 1 alpha subcomplex subunit 7 [Source:UniProtKB/TrEMBL;Acc:C4Q2F9]			SM_V10_Z
0.512	0.0267106	0.024	0.0385353	0.066	0.041	Muscle 1	Smp_146200	Putative zyxin/trip6	Source:UniProtKB/TrEMBL;Acc:G4VQS1]	schistosoma_mansoni_prjea36577	Putative zyxin/trip6 [Source:UniProtKB/TrEMBL;Acc:G4VQS1]			SM_V10_Z
0.512	0.0242046	0.024	0.0349198	0.042	0.017	Muscle 1	Smp_141830	Transcriptional enhancer factor (Tef) related	Source:UniProtKB/TrEMBL;Acc:A0A5K4EPS1]	schistosoma_mansoni_prjea36577	Transcriptional enhancer factor (Tef) related [Source:UniProtKB/TrEMBL;Acc:A0A5K4EPS1]			SM_V10_Z
0.512	0.0234863	0.024	0.0338836	0.052	0.027	Muscle 1	Smp_067580	Calcium uniporter protein	Source:UniProtKB/TrEMBL;Acc:A0A3Q0KH70]	schistosoma_mansoni_prjea36577	Calcium uniporter protein [Source:UniProtKB/TrEMBL;Acc:A0A3Q0KH70]			SM_V10_Z
0.512	0.0222556	0.024	0.032108	0.1	0.076	Muscle 1	Smp_144760	Monocarboxylate transporter, putative	Source:UniProtKB/TrEMBL;Acc:A0A3Q0KNW7]	schistosoma_mansoni_prjea36577	Monocarboxylate transporter, putative [Source:UniProtKB/TrEMBL;Acc:A0A3Q0KNW7]			SM_V10_7
0.512	0.0344622	0.024	0.0497184	0.218	0.196	Muscle 1	Smp_128000	HMG box domain-containing protein	Source:UniProtKB/TrEMBL;Acc:A0A3Q0KLB7]	schistosoma_mansoni_prjea36577	HMG box domain-containing protein [Source:UniProtKB/TrEMBL;Acc:A0A3Q0KLB7]			SM_V10_6
0.512	0.0259371	0.024	0.0374194	0.071	0.048	Muscle 1	Smp_315490	Bifunctional polynucleotide phosphatase/kinase	Source:UniProtKB/TrEMBL;Acc:A0A5K4F620]	schistosoma_mansoni_prjea36577	Bifunctional polynucleotide phosphatase/kinase [Source:UniProtKB/TrEMBL;Acc:A0A5K4F620]			SM_V10_6
0.512	0.0235857	0.024	0.034027	0.035	0.012	Muscle 1	Smp_147140	Putative transient receptor potential cation channel	Source:UniProtKB/TrEMBL;Acc:A0A3Q0KP99]	schistosoma_mansoni_prjea36577	Putative transient receptor potential cation channel [Source:UniProtKB/TrEMBL;Acc:A0A3Q0KP99]			SM_V10_6
0.512	0.0208124	0.024	0.030026	0.09	0.066	Muscle 1	Smp_154160	ER lumen protein-retaining receptor	Source:UniProtKB/TrEMBL;Acc:A0A3Q0KQ74]	schistosoma_mansoni_prjea36577	ER lumen protein-retaining receptor [Source:UniProtKB/TrEMBL;Acc:A0A3Q0KQ74]			SM_V10_5
0.512	0.0228009	0.024	0.0328948	0.052	0.029	Muscle 1	Smp_156870	Protein-tyrosine-phosphatase	Source:UniProtKB/TrEMBL;Acc:A0A3Q0KQR2]	schistosoma_mansoni_prjea36577	Protein-tyrosine-phosphatase [Source:UniProtKB/TrEMBL;Acc:A0A3Q0KQR2]			SM_V10_5
0.512	0.0250374	0.024	0.0361213	0.079	0.055	Muscle 1	Smp_156880	Sec24-related C, d	Source:UniProtKB/TrEMBL;Acc:G4VKC5]	schistosoma_mansoni_prjea36577	Sec24-related C, d [Source:UniProtKB/TrEMBL;Acc:G4VKC5]			SM_V10_5
0.512	0.0260229	0.024	0.0375431	0.042	0.018	Muscle 1	Smp_069890	UPF0193 protein EVG1 homolog	Source:UniProtKB/TrEMBL;Acc:A0A3Q0KHD2]	schistosoma_mansoni_prjea36577	UPF0193 protein EVG1 homolog [Source:UniProtKB/TrEMBL;Acc:A0A3Q0KHD2]			SM_V10_5
0.512	0.0248679	0.024	0.0358768	0.034	0.011	Muscle 1	Smp_342540	ETS domain-containing protein	Source:UniProtKB/TrEMBL;Acc:A0A5K4FA96]	schistosoma_mansoni_prjea36577	ETS domain-containing protein [Source:UniProtKB/TrEMBL;Acc:A0A5K4FA96]			SM_V10_4
0.512	0.0219276	0.024	0.0316348	0.049	0.026	Muscle 1	Smp_144920	Coiled-coil domain-containing protein 134-like	Source:UniProtKB/TrEMBL;Acc:A0A5K4ER37]	schistosoma_mansoni_prjea36577	Coiled-coil domain-containing protein 134-like [Source:UniProtKB/TrEMBL;Acc:A0A5K4ER37]			SM_V10_4
0.512	0.0226776	0.024	0.0327168	0.15	0.126	Muscle 1	Smp_013060	Mothers against decapentaplegic homolog	Source:UniProtKB/TrEMBL;Acc:Q9GQN9]	schistosoma_mansoni_prjea36577	Mothers against decapentaplegic homolog [Source:UniProtKB/TrEMBL;Acc:Q9GQN9]	Smad1	UniProtKB Gene Name	SM_V10_3
0.512	0.0426266	0.024	0.0614972	0.574	0.584	Muscle 1	Smp_021760	60S ribosome subunit biogenesis protein NIP7 homolog	Source:UniProtKB/TrEMBL;Acc:G4VDU6]	schistosoma_mansoni_prjea36577	60S ribosome subunit biogenesis protein NIP7 homolog [Source:UniProtKB/TrEMBL;Acc:G4VDU6]			SM_V10_2
0.512	0.0236792	0.024	0.0341619	0.082	0.057	Muscle 1	Smp_311780	Alpha 1,6 fucosyltransferase H	Source:UniProtKB/TrEMBL;Acc:G9HW02]	schistosoma_mansoni_prjea36577	Alpha 1,6 fucosyltransferase H [Source:UniProtKB/TrEMBL;Acc:G9HW02]	FucTH	UniProtKB Gene Name	SM_V10_2
0.512	0.0277197	0.024	0.0399911	0.036	0.011	Muscle 1	Smp_245990	Innexin	Source:UniProtKB/TrEMBL;Acc:G4VE56]	schistosoma_mansoni_prjea36577	Innexin [Source:UniProtKB/TrEMBL;Acc:G4VE56]	inx	UniProtKB Gene Name	SM_V10_2
0.512	0.0351731	0.024	0.0507441	0.245	0.224	Muscle 1	Smp_014800	PRA1 family protein	Source:UniProtKB/TrEMBL;Acc:A0A3Q0KCM1]	schistosoma_mansoni_prjea36577	PRA1 family protein [Source:UniProtKB/TrEMBL;Acc:A0A3Q0KCM1]			SM_V10_2
0.512	0.0227974	0.024	0.0328896	0.054	0.03	Muscle 1	Smp_009540	Putative ring finger-containing	Source:UniProtKB/TrEMBL;Acc:A0A5K4E9U5]	schistosoma_mansoni_prjea36577	Putative ring finger-containing [Source:UniProtKB/TrEMBL;Acc:A0A5K4E9U5]			SM_V10_2
0.512	0.0252963	0.024	0.0364949	0.026	0.001	Muscle 1	Smp_098550	Trim56 protein, putative	Source:UniProtKB/TrEMBL;Acc:A0A3Q0KJJ0]	schistosoma_mansoni_prjea36577	Trim56 protein, putative [Source:UniProtKB/TrEMBL;Acc:A0A3Q0KJJ0]			SM_V10_2
0.512	0.0234834	0.024	0.0338794	0.089	0.065	Muscle 1	Smp_095910	Putative signal recognition particle receptor alpha subunit (Sr-alpha)	Source:UniProtKB/TrEMBL;Acc:G4VDN9]	schistosoma_mansoni_prjea36577	Putative signal recognition particle receptor alpha subunit (Sr-alpha) [Source:UniProtKB/TrEMBL;Acc:G4VDN9]			SM_V10_2
0.512	0.0155364	0.024	0.0224142	0.101	0.075	Muscle 1	Smp_023940	GRIP domain-containing protein	Source:UniProtKB/TrEMBL;Acc:A0A3Q0KDD5]	schistosoma_mansoni_prjea36577	GRIP domain-containing protein [Source:UniProtKB/TrEMBL;Acc:A0A3Q0KDD5]			SM_V10_1
0.512	0.00209949	0.024	0.00302893	0.151	0.123	Muscle 1	Smp_121990	Glycerol-3-phosphate dehydrogenase	Source:UniProtKB/TrEMBL;Acc:A0A5K4EKL2]	schistosoma_mansoni_prjea36577	Glycerol-3-phosphate dehydrogenase [Source:UniProtKB/TrEMBL;Acc:A0A5K4EKL2]			SM_V10_1
0.512	0.0231577	0.024	0.0334095	0.05	0.025	Muscle 1	Smp_105040	Nocturnin	Source:UniProtKB/TrEMBL;Acc:A0A3Q0KJY7]	schistosoma_mansoni_prjea36577	Nocturnin [Source:UniProtKB/TrEMBL;Acc:A0A3Q0KJY7]			SM_V10_1
0.512	0.0232112	0.024	0.0334866	0.196	0.172	Muscle 1	Smp_031950	Programmed cell death protein 10	Source:UniProtKB/TrEMBL;Acc:C4Q5Z1]	schistosoma_mansoni_prjea36577	Programmed cell death protein 10 [Source:UniProtKB/TrEMBL;Acc:C4Q5Z1]			SM_V10_1
0.512	0.0214247	0.024	0.0309093	0.069	0.044	Muscle 1	Smp_010230	Smp_010230	Source:UniProtKB/TrEMBL;Acc:A0A3Q0KC86]	schistosoma_mansoni_prjea36577	Smp_010230 [Source:UniProtKB/TrEMBL;Acc:A0A3Q0KC86]			SM_V10_1
0.512	0.0438897	0.024	0.0633194	0.275	0.259	Muscle 1	Smp_319110	Fe-S_biosyn domain-containing protein	Source:UniProtKB/TrEMBL;Acc:A0A5K4F534]	schistosoma_mansoni_prjea36577	Fe-S_biosyn domain-containing protein [Source:UniProtKB/TrEMBL;Acc:A0A5K4F534]			SM_V10_1
0.512	0.0229474	0.024	0.0331062	0.03	0.007	Muscle 1	Smp_003440	Putative spfh domain / Band 7 family protein	Source:UniProtKB/TrEMBL;Acc:G4V6P0]	schistosoma_mansoni_prjea36577	Putative spfh domain / Band 7 family protein [Source:UniProtKB/TrEMBL;Acc:G4V6P0]			SM_V10_1
0.512	0.0153019	0.024	0.022076	0.129	0.103	Muscle 1	Smp_013690	BRO1 domain-containing protein	Source:UniProtKB/TrEMBL;Acc:G4V6A5]	schistosoma_mansoni_prjea36577	BRO1 domain-containing protein [Source:UniProtKB/TrEMBL;Acc:G4V6A5]			SM_V10_1
0.512	0.0286804	0.024	0.0413771	0.073	0.049	Muscle 1	Smp_089700	Integrin beta	Source:UniProtKB/TrEMBL;Acc:A0A3Q0KIZ6]	schistosoma_mansoni_prjea36577	Integrin beta [Source:UniProtKB/TrEMBL;Acc:A0A3Q0KIZ6]	beta-Int1	UniProtKB Gene Name	SM_V10_1
0.512	0.0281344	0.024	0.0405894	0.292	0.272	Muscle 1	Smp_016180	Putative nuclear hormone receptor	Source:UniProtKB/TrEMBL;Acc:A0A3Q0KCQ5]	schistosoma_mansoni_prjea36577	Putative nuclear hormone receptor [Source:UniProtKB/TrEMBL;Acc:A0A3Q0KCQ5]			SM_V10_1
0.511	0.0149538	0.022	0.0215738	0.09	0.067	Muscle 1	Smp_337110	E3 ubiquitin-protein ligase	Source:UniProtKB/TrEMBL;Acc:A0A5K4FDD6]	schistosoma_mansoni_prjea36577	E3 ubiquitin-protein ligase [Source:UniProtKB/TrEMBL;Acc:A0A5K4FDD6]			SM_V10_Z
0.511	0.0390264	0.022	0.0563032	0.219	0.2	Muscle 1	Smp_165460	WD_REPEATS_REGION domain-containing protein	Source:UniProtKB/TrEMBL;Acc:G4VTP7]	schistosoma_mansoni_prjea36577	WD_REPEATS_REGION domain-containing protein [Source:UniProtKB/TrEMBL;Acc:G4VTP7]			SM_V10_Z
0.511	0.0244948	0.022	0.0353385	0.029	0.007	Muscle 1	Smp_244630	Innexin	Source:UniProtKB/TrEMBL;Acc:A0A5K4F1H2]	schistosoma_mansoni_prjea36577	Innexin [Source:UniProtKB/TrEMBL;Acc:A0A5K4F1H2]	inx	UniProtKB Gene Name	SM_V10_Z
0.511	0.0217264	0.022	0.0313446	0.043	0.021	Muscle 1	Smp_164760	Ig-like domain-containing protein	Source:UniProtKB/TrEMBL;Acc:A0A3Q0KRS0]	schistosoma_mansoni_prjea36577	Ig-like domain-containing protein [Source:UniProtKB/TrEMBL;Acc:A0A3Q0KRS0]			SM_V10_Z
0.511	0.0209768	0.022	0.0302631	0.095	0.073	Muscle 1	Smp_341580	Smp_341580	Smp_341580~	schistosoma_mansoni_prjea36577				SM_V10_Z
0.511	0.0236892	0.022	0.0341763	0.099	0.078	Muscle 1	Smp_349450	Smp_349450	Smp_349450~	schistosoma_mansoni_prjea36577				SM_V10_Z
0.511	0.0237139	0.022	0.0342119	0.046	0.024	Muscle 1	Smp_171750	Putative axis inhibition protein, axin	Source:UniProtKB/TrEMBL;Acc:A0A3Q0KSY2]	schistosoma_mansoni_prjea36577	Putative axis inhibition protein, axin [Source:UniProtKB/TrEMBL;Acc:A0A3Q0KSY2]			SM_V10_Z
0.511	0.0216487	0.022	0.0312324	0.097	0.075	Muscle 1	Smp_127660	BLOC-1-related complex subunit 8	Source:UniProtKB/TrEMBL;Acc:A0A3Q0KL94]	schistosoma_mansoni_prjea36577	BLOC-1-related complex subunit 8 [Source:UniProtKB/TrEMBL;Acc:A0A3Q0KL94]			SM_V10_7
0.511	0.0158049	0.022	0.0228017	0.056	0.034	Muscle 1	Smp_097370	fructose-bisphosphatase	Source:UniProtKB/TrEMBL;Acc:G4VML1]	schistosoma_mansoni_prjea36577	fructose-bisphosphatase [Source:UniProtKB/TrEMBL;Acc:G4VML1]			SM_V10_7
0.511	0.0289848	0.022	0.0418162	0.101	0.079	Muscle 1	Smp_164050	O-phosphoseryl-tRNA(Sec) selenium transferase	Source:UniProtKB/TrEMBL;Acc:A0A3Q0KRT8]	schistosoma_mansoni_prjea36577	O-phosphoseryl-tRNA(Sec) selenium transferase [Source:UniProtKB/TrEMBL;Acc:A0A3Q0KRT8]			SM_V10_6
0.511	0.0227212	0.022	0.0327798	0.043	0.021	Muscle 1	Smp_248010	LIM domain-containing protein	Source:UniProtKB/TrEMBL;Acc:A0A5K4F186]	schistosoma_mansoni_prjea36577	LIM domain-containing protein [Source:UniProtKB/TrEMBL;Acc:A0A5K4F186]			SM_V10_6
0.511	0.0367656	0.022	0.0530416	0.378	0.367	Muscle 1	Smp_005320	Deltameth_res domain-containing protein	Source:UniProtKB/TrEMBL;Acc:A0A3Q0KBU2]	schistosoma_mansoni_prjea36577	Deltameth_res domain-containing protein [Source:UniProtKB/TrEMBL;Acc:A0A3Q0KBU2]			SM_V10_6
0.511	0.0219923	0.022	0.0317281	0.04	0.019	Muscle 1	Smp_068530	Putative syntenin	Source:UniProtKB/TrEMBL;Acc:G4VM57]	schistosoma_mansoni_prjea36577	Putative syntenin [Source:UniProtKB/TrEMBL;Acc:G4VM57]			SM_V10_6
0.511	0.0227445	0.022	0.0328134	0.025	0.003	Muscle 1	Smp_176720	Lipoma hmgic fusion partner-like protein 4	Source:UniProtKB/TrEMBL;Acc:A0A3Q0KTK1]	schistosoma_mansoni_prjea36577	Lipoma hmgic fusion partner-like protein 4 [Source:UniProtKB/TrEMBL;Acc:A0A3Q0KTK1]			SM_V10_6
0.511	0.026659	0.022	0.0384608	0.123	0.101	Muscle 1	Smp_080700	JNK-interacting protein 3	Source:UniProtKB/TrEMBL;Acc:A0A5K4EHA0]	schistosoma_mansoni_prjea36577	JNK-interacting protein 3 [Source:UniProtKB/TrEMBL;Acc:A0A5K4EHA0]			SM_V10_6
0.511	0.0317294	0.022	0.0457758	0.19	0.17	Muscle 1	Smp_247710	Activating signal cointegrator 1 complex subunit 3	Source:UniProtKB/TrEMBL;Acc:A0A5K4F2K3]	schistosoma_mansoni_prjea36577	Activating signal cointegrator 1 complex subunit 3 [Source:UniProtKB/TrEMBL;Acc:A0A5K4F2K3]			SM_V10_5
0.511	0.0237268	0.022	0.0342305	0.119	0.096	Muscle 1	Smp_064040	non-specific serine/threonine protein kinase	Source:UniProtKB/TrEMBL;Acc:G4VIN1]	schistosoma_mansoni_prjea36577	non-specific serine/threonine protein kinase [Source:UniProtKB/TrEMBL;Acc:G4VIN1]			SM_V10_4
0.511	0.0306367	0.022	0.0441993	0.122	0.1	Muscle 1	Smp_038630	Mitochondrial import inner membrane translocase subunit TIM22	Source:UniProtKB/TrEMBL;Acc:G4VI93]	schistosoma_mansoni_prjea36577	Mitochondrial import inner membrane translocase subunit TIM22 [Source:UniProtKB/TrEMBL;Acc:G4VI93]			SM_V10_4
0.511	0.0224781	0.022	0.0324291	0.06	0.038	Muscle 1	Smp_347930	SH3 domain-binding protein 5-like	Source:UniProtKB/TrEMBL;Acc:A0A5K4FEN7]	schistosoma_mansoni_prjea36577	SH3 domain-binding protein 5-like [Source:UniProtKB/TrEMBL;Acc:A0A5K4FEN7]			SM_V10_4
0.511	0.0229997	0.022	0.0331815	0.104	0.082	Muscle 1	Smp_341890	Tr-type G domain-containing protein	Source:UniProtKB/TrEMBL;Acc:A0A5K4FAS2]	schistosoma_mansoni_prjea36577	Tr-type G domain-containing protein [Source:UniProtKB/TrEMBL;Acc:A0A5K4FAS2]			SM_V10_3
0.511	0.0198583	0.022	0.0286495	0.05	0.028	Muscle 1	Smp_196090	Putative tgf-beta receptor	Source:UniProtKB/TrEMBL;Acc:A0A3Q0KUG4]	schistosoma_mansoni_prjea36577	Putative tgf-beta receptor [Source:UniProtKB/TrEMBL;Acc:A0A3Q0KUG4]			SM_V10_3
0.511	0.0144643	0.022	0.0208676	0.155	0.133	Muscle 1	Smp_000340	Ecdysone-induced protein E78; Nuclear hormone receptor superfamily protein-related	Source:UniProtKB/TrEMBL;Acc:A0A3Q0KBB9]	schistosoma_mansoni_prjea36577	Ecdysone-induced protein E78; Nuclear hormone receptor superfamily protein-related [Source:UniProtKB/TrEMBL;Acc:A0A3Q0KBB9]	E78	UniProtKB Gene Name	SM_V10_3
0.511	0.0237138	0.022	0.0342117	0.281	0.261	Muscle 1	Smp_029890	Septin-10	Source:UniProtKB/Swiss-Prot;Acc:A0A3Q0KDV9]	schistosoma_mansoni_prjea36577	Septin-10 [Source:UniProtKB/Swiss-Prot;Acc:A0A3Q0KDV9]	2023-09-10	UniProtKB Gene Name	SM_V10_3
0.511	0.0268232	0.022	0.0386977	0.128	0.107	Muscle 1	Smp_075000	Smp_075000	Smp_075000~	schistosoma_mansoni_prjea36577				SM_V10_3
0.511	0.0222673	0.022	0.0321249	0.047	0.025	Muscle 1	Smp_121390	Smp_121390	Smp_121390~	schistosoma_mansoni_prjea36577				SM_V10_3
0.511	0.0255512	0.022	0.0368625	0.294	0.275	Muscle 1	Smp_201970	Smp_201970	Smp_201970~	schistosoma_mansoni_prjea36577				SM_V10_2
0.511	0.025773	0.022	0.0371826	0.092	0.07	Muscle 1	Smp_146360	SF4 helicase domain-containing protein	Source:UniProtKB/TrEMBL;Acc:A0A3Q0KP56]	schistosoma_mansoni_prjea36577	SF4 helicase domain-containing protein [Source:UniProtKB/TrEMBL;Acc:A0A3Q0KP56]			SM_V10_2
0.511	0.0233419	0.022	0.0336752	0.037	0.014	Muscle 1	Smp_136620	Glycosyl transferase	Source:UniProtKB/TrEMBL;Acc:C4Q4G9]	schistosoma_mansoni_prjea36577	Glycosyl transferase [Source:UniProtKB/TrEMBL;Acc:C4Q4G9]			SM_V10_2
0.511	0.022719	0.022	0.0327766	0.087	0.064	Muscle 1	Smp_049140	Sugar phosphate phosphatase	Source:UniProtKB/TrEMBL;Acc:A0A5K4EDV2]	schistosoma_mansoni_prjea36577	Sugar phosphate phosphatase [Source:UniProtKB/TrEMBL;Acc:A0A5K4EDV2]			SM_V10_2
0.511	0.0245474	0.022	0.0354145	0.111	0.089	Muscle 1	Smp_046870	DHC_N1 domain-containing protein	Source:UniProtKB/TrEMBL;Acc:G4VCL4]	schistosoma_mansoni_prjea36577	DHC_N1 domain-containing protein [Source:UniProtKB/TrEMBL;Acc:G4VCL4]			SM_V10_2
0.511	0.0240672	0.022	0.0347216	0.071	0.049	Muscle 1	Smp_124600	BZIP domain-containing protein	Source:UniProtKB/TrEMBL;Acc:A0A3Q0KKT4]	schistosoma_mansoni_prjea36577	BZIP domain-containing protein [Source:UniProtKB/TrEMBL;Acc:A0A3Q0KKT4]			SM_V10_2
0.511	0.0223987	0.022	0.0323145	0.026	0.004	Muscle 1	Smp_135140	Putative high voltage-activated calcium channel beta subunit 1	Source:UniProtKB/TrEMBL;Acc:A0A3Q0KMG2]	schistosoma_mansoni_prjea36577	Putative high voltage-activated calcium channel beta subunit 1 [Source:UniProtKB/TrEMBL;Acc:A0A3Q0KMG2]	CavBvar	UniProtKB Gene Name	SM_V10_1
0.511	0.0177568	0.022	0.0256177	0.122	0.1	Muscle 1	Smp_051640	Uridylate-specific endoribonuclease	Source:UniProtKB/TrEMBL;Acc:A0A3Q0KFW3]	schistosoma_mansoni_prjea36577	Uridylate-specific endoribonuclease [Source:UniProtKB/TrEMBL;Acc:A0A3Q0KFW3]			SM_V10_1
0.511	0.0249193	0.022	0.0359509	0.121	0.098	Muscle 1	Smp_196690	Nuclear lim interactor-interacting factor-related	Source:UniProtKB/TrEMBL;Acc:A0A3Q0KUF8]	schistosoma_mansoni_prjea36577	Nuclear lim interactor-interacting factor-related [Source:UniProtKB/TrEMBL;Acc:A0A3Q0KUF8]			SM_V10_1
0.511	0.0194487	0.022	0.0280585	0.15	0.128	Muscle 1	Smp_079650	Putative chromodomain helicase DNA binding protein	Source:UniProtKB/TrEMBL;Acc:A0A3Q0KIA2]	schistosoma_mansoni_prjea36577	Putative chromodomain helicase DNA binding protein [Source:UniProtKB/TrEMBL;Acc:A0A3Q0KIA2]			SM_V10_1
0.511	0.0208123	0.022	0.0300258	0.087	0.064	Muscle 1	Smp_095470	Mps one binder kinase activator-like 2 (Mob1 homolog 2) (Protein mob3)	Source:UniProtKB/TrEMBL;Acc:G4V848]	schistosoma_mansoni_prjea36577	Mps one binder kinase activator-like 2 (Mob1 homolog 2) (Protein mob3) [Source:UniProtKB/TrEMBL;Acc:G4V848]			SM_V10_1
0.511	0.019513	0.022	0.0281512	0.103	0.081	Muscle 1	Smp_060490	Putative serine-rich protein	Source:UniProtKB/TrEMBL;Acc:A0A3Q0KGL5]	schistosoma_mansoni_prjea36577	Putative serine-rich protein [Source:UniProtKB/TrEMBL;Acc:A0A3Q0KGL5]			SM_V10_1
0.511	0.0251093	0.022	0.0362251	0.422	0.407	Muscle 1	Smp_180170	Smp_180170	Smp_180170~	schistosoma_mansoni_prjea36577				SM_V10_1
0.511	0.0202026	0.022	0.0291462	0.049	0.028	Muscle 1	Smp_127310	Biogenic amine (Dopamine) receptor, putative	Source:UniProtKB/TrEMBL;Acc:G4LUJ1]	schistosoma_mansoni_prjea36577	Biogenic amine (Dopamine) receptor, putative [Source:UniProtKB/TrEMBL;Acc:G4LUJ1]			SM_V10_1
0.511	0.0210054	0.022	0.0303044	0.109	0.086	Muscle 1	Smp_210470	Putative tbc1 domain family member	Source:UniProtKB/TrEMBL;Acc:A0A3Q0KVE0]	schistosoma_mansoni_prjea36577	Putative tbc1 domain family member [Source:UniProtKB/TrEMBL;Acc:A0A3Q0KVE0]			SM_V10_1
0.511	0.0244403	0.022	0.03526	0.026	0.004	Muscle 1	Smp_126140	Alpha integrin receptor 1; Putative integrin alpha	Source:UniProtKB/TrEMBL;Acc:A0A3Q0KL07]	schistosoma_mansoni_prjea36577	Alpha integrin receptor 1; Putative integrin alpha [Source:UniProtKB/TrEMBL;Acc:A0A3Q0KL07]	alpha-Int1	UniProtKB Gene Name	SM_V10_1
0.511	0.0224309	0.022	0.032361	0.025	0.004	Muscle 1	Smp_333650	Putative transient receptor potential cation channel,subfamily m, member	Source:UniProtKB/TrEMBL;Acc:A0A5K4FCC0]	schistosoma_mansoni_prjea36577	Putative transient receptor potential cation channel,subfamily m, member [Source:UniProtKB/TrEMBL;Acc:A0A5K4FCC0]			SM_V10_1
0.511	0.0208642	0.022	0.0301007	0.047	0.025	Muscle 1	Smp_035220	Kinesin-like protein	Source:UniProtKB/TrEMBL;Acc:A0A3Q0KEE7]	schistosoma_mansoni_prjea36577	Kinesin-like protein [Source:UniProtKB/TrEMBL;Acc:A0A3Q0KEE7]			SM_V10_1
0.511	0.0181796	0.022	0.0262277	0.07	0.047	Muscle 1	Smp_004070	Carbonic anhydrase	Source:UniProtKB/TrEMBL;Acc:A0A3Q0KBP5]	schistosoma_mansoni_prjea36577	Carbonic anhydrase [Source:UniProtKB/TrEMBL;Acc:A0A3Q0KBP5]			SM_V10_1
0.511	0.0191658	0.022	0.0276505	0.089	0.066	Muscle 1	Smp_306370	non-specific serine/threonine protein kinase	Source:UniProtKB/TrEMBL;Acc:A0A5K4F4F1]	schistosoma_mansoni_prjea36577	non-specific serine/threonine protein kinase [Source:UniProtKB/TrEMBL;Acc:A0A5K4F4F1]			SM_V10_1
0.51	0.0265146	0.02	0.0382525	0.141	0.122	Muscle 1	Smp_267020	dimethylargininase	Source:UniProtKB/TrEMBL;Acc:A0A5K4F1Q9]	schistosoma_mansoni_prjea36577	dimethylargininase [Source:UniProtKB/TrEMBL;Acc:A0A5K4F1Q9]			SM_V10_Z
0.51	0.0203012	0.02	0.0292884	0.065	0.044	Muscle 1	Smp_333410	non-specific serine/threonine protein kinase	Source:UniProtKB/TrEMBL;Acc:A0A5K4FAW4]	schistosoma_mansoni_prjea36577	non-specific serine/threonine protein kinase [Source:UniProtKB/TrEMBL;Acc:A0A5K4FAW4]			SM_V10_Z
0.51	0.0129153	0.02	0.0186328	0.099	0.077	Muscle 1	Smp_243850	USP domain-containing protein	Source:UniProtKB/TrEMBL;Acc:A0A5K4F189]	schistosoma_mansoni_prjea36577	USP domain-containing protein [Source:UniProtKB/TrEMBL;Acc:A0A5K4F189]			SM_V10_Z
0.51	0.0200245	0.02	0.0288893	0.03	0.011	Muscle 1	Smp_129810	Putative rhodopsin-like orphan GPCR	Source:UniProtKB/TrEMBL;Acc:G4VS40]	schistosoma_mansoni_prjea36577	Putative rhodopsin-like orphan GPCR [Source:UniProtKB/TrEMBL;Acc:G4VS40]			SM_V10_Z
0.51	0.0179329	0.02	0.0258716	0.027	0.008	Muscle 1	Smp_323920	PH domain-containing protein	Source:UniProtKB/TrEMBL;Acc:A0A5K4F5P3]	schistosoma_mansoni_prjea36577	PH domain-containing protein [Source:UniProtKB/TrEMBL;Acc:A0A5K4F5P3]			SM_V10_Z
0.51	0.0243335	0.02	0.0351059	0.06	0.039	Muscle 1	Smp_045930	Transmembrane protein 65	Source:UniProtKB/TrEMBL;Acc:G4VPQ7]	schistosoma_mansoni_prjea36577	Transmembrane protein 65 [Source:UniProtKB/TrEMBL;Acc:G4VPQ7]			SM_V10_Z
0.51	0.0212501	0.02	0.0306575	0.055	0.036	Muscle 1	Smp_146870	VPS13_mid_rpt domain-containing protein	Source:UniProtKB/TrEMBL;Acc:A0A3Q0KP98]	schistosoma_mansoni_prjea36577	VPS13_mid_rpt domain-containing protein [Source:UniProtKB/TrEMBL;Acc:A0A3Q0KP98]			SM_V10_Z
0.51	0.0425022	0.02	0.0613178	0.294	0.286	Muscle 1	Smp_025570	diphthine methyl ester synthase	Source:UniProtKB/TrEMBL;Acc:A0A3Q0KDI0]	schistosoma_mansoni_prjea36577	diphthine methyl ester synthase [Source:UniProtKB/TrEMBL;Acc:A0A3Q0KDI0]			SM_V10_Z
0.51	0.0175528	0.02	0.0253233	0.168	0.149	Muscle 1	Smp_153720	VIR_N domain-containing protein	Source:UniProtKB/TrEMBL;Acc:A0A3Q0KQH0]	schistosoma_mansoni_prjea36577	VIR_N domain-containing protein [Source:UniProtKB/TrEMBL;Acc:A0A3Q0KQH0]			SM_V10_Z
0.51	0.0276597	0.02	0.0399045	0.448	0.438	Muscle 1	Smp_166600	Ubiquitin conjugating enzyme variant; Ubiquitin conjugating enzyme variant; Ubiquitin conjugating enzyme, putative	Source:UniProtKB/TrEMBL;Acc:Q2MK72]	schistosoma_mansoni_prjea36577	Ubiquitin conjugating enzyme variant; Ubiquitin conjugating enzyme variant; Ubiquitin conjugating enzyme, putative [Source:UniProtKB/TrEMBL;Acc:Q2MK72]			SM_V10_Z
0.51	0.0196169	0.02	0.0283012	0.048	0.028	Muscle 1	Smp_007650	Glycogen debranching enzyme	Source:UniProtKB/TrEMBL;Acc:A0A3Q0KC14]	schistosoma_mansoni_prjea36577	Glycogen debranching enzyme [Source:UniProtKB/TrEMBL;Acc:A0A3Q0KC14]			SM_V10_Z
0.51	0.0147507	0.02	0.0212808	0.089	0.069	Muscle 1	Smp_097320	PH domain-containing protein	Source:UniProtKB/TrEMBL;Acc:G4VMK5]	schistosoma_mansoni_prjea36577	PH domain-containing protein [Source:UniProtKB/TrEMBL;Acc:G4VMK5]			SM_V10_7
0.51	0.032769	0.02	0.0472757	0.184	0.165	Muscle 1	Smp_086030	Protein phosphatase 1 regulatory subunit 42	Source:UniProtKB/TrEMBL;Acc:G4LZA1]	schistosoma_mansoni_prjea36577	Protein phosphatase 1 regulatory subunit 42 [Source:UniProtKB/TrEMBL;Acc:G4LZA1]			SM_V10_6
0.51	0.0216532	0.02	0.031239	0.081	0.062	Muscle 1	Smp_172220	ER membrane protein complex subunit 2	Source:UniProtKB/TrEMBL;Acc:A0A3Q0KTC8]	schistosoma_mansoni_prjea36577	ER membrane protein complex subunit 2 [Source:UniProtKB/TrEMBL;Acc:A0A3Q0KTC8]			SM_V10_6
0.51	0.0233695	0.02	0.033715	0.155	0.136	Muscle 1	Smp_179290	Bromo domain-containing protein	Source:UniProtKB/TrEMBL;Acc:A0A3Q0KTT6]	schistosoma_mansoni_prjea36577	Bromo domain-containing protein [Source:UniProtKB/TrEMBL;Acc:A0A3Q0KTT6]			SM_V10_6
0.51	0.0228591	0.02	0.0329787	0.159	0.14	Muscle 1	Smp_155510	Store-operated calcium entry-associated regulatory factor	Source:UniProtKB/TrEMBL;Acc:A0A3Q0KQE7]	schistosoma_mansoni_prjea36577	Store-operated calcium entry-associated regulatory factor [Source:UniProtKB/TrEMBL;Acc:A0A3Q0KQE7]			SM_V10_6
0.51	0.0269456	0.02	0.0388743	0.119	0.1	Muscle 1	Smp_042080	Protein MIS12 homolog	Source:UniProtKB/TrEMBL;Acc:G4VJT0]	schistosoma_mansoni_prjea36577	Protein MIS12 homolog [Source:UniProtKB/TrEMBL;Acc:G4VJT0]			SM_V10_4
0.51	0.022468	0.02	0.0324144	0.043	0.023	Muscle 1	Smp_135540	GATA-type domain-containing protein	Source:UniProtKB/TrEMBL;Acc:G4VIR4]	schistosoma_mansoni_prjea36577	GATA-type domain-containing protein [Source:UniProtKB/TrEMBL;Acc:G4VIR4]			SM_V10_4
0.51	0.0233792	0.02	0.033729	0.027	0.007	Muscle 1	Smp_202470	Smp_202470	Source:UniProtKB/TrEMBL;Acc:A0A3Q0KUU2]	schistosoma_mansoni_prjea36577	Smp_202470 [Source:UniProtKB/TrEMBL;Acc:A0A3Q0KUU2]			SM_V10_4
0.51	0.0183598	0.02	0.0264875	0.078	0.058	Muscle 1	Smp_150120	Smp_150120	Smp_150120~	schistosoma_mansoni_prjea36577				SM_V10_4
0.51	0.0218131	0.02	0.0314696	0.043	0.023	Muscle 1	Smp_150090	Putative monocarboxylate transporter	Source:UniProtKB/TrEMBL;Acc:A0A5K4ES84]	schistosoma_mansoni_prjea36577	Putative monocarboxylate transporter [Source:UniProtKB/TrEMBL;Acc:A0A5K4ES84]			SM_V10_4
0.51	0.0225363	0.02	0.032513	0.135	0.114	Muscle 1	Smp_001180	Helicase ARIP4	Source:UniProtKB/TrEMBL;Acc:A0A3Q0KBG6]	schistosoma_mansoni_prjea36577	Helicase ARIP4 [Source:UniProtKB/TrEMBL;Acc:A0A3Q0KBG6]			SM_V10_3
0.51	0.0218862	0.02	0.0315751	0.072	0.052	Muscle 1	Smp_136780	Ubiquitin-like domain-containing protein	Source:UniProtKB/TrEMBL;Acc:A0A5K4ENI8]	schistosoma_mansoni_prjea36577	Ubiquitin-like domain-containing protein [Source:UniProtKB/TrEMBL;Acc:A0A5K4ENI8]			SM_V10_3
0.51	0.0475344	0.02	0.0685776	0.487	0.494	Muscle 1	Smp_002550	RNA-binding protein 8A	Source:UniProtKB/TrEMBL;Acc:G4VF55]	schistosoma_mansoni_prjea36577	RNA-binding protein 8A [Source:UniProtKB/TrEMBL;Acc:G4VF55]			SM_V10_3
0.51	0.0263864	0.02	0.0380676	0.092	0.072	Muscle 1	Smp_333550	Smp_333550	Smp_333550~	schistosoma_mansoni_prjea36577				SM_V10_3
0.51	0.022713	0.02	0.032768	0.101	0.082	Muscle 1	Smp_013370	Tetraspanin	Source:UniProtKB/TrEMBL;Acc:A0A3Q0KCI4]	schistosoma_mansoni_prjea36577	Tetraspanin [Source:UniProtKB/TrEMBL;Acc:A0A3Q0KCI4]			SM_V10_3
0.51	0.0172116	0.02	0.024831	0.189	0.169	Muscle 1	Smp_018760	Neutral alpha-glucosidase ab (Glucosidase II alpha subunit) (Alpha glucosidase 2),putative	Source:UniProtKB/TrEMBL;Acc:G4M039]	schistosoma_mansoni_prjea36577	Neutral alpha-glucosidase ab (Glucosidase II alpha subunit) (Alpha glucosidase 2),putative [Source:UniProtKB/TrEMBL;Acc:G4M039]			SM_V10_3
0.51	0.0171608	0.02	0.0247579	0.118	0.097	Muscle 1	Smp_340590	Phosphatidylinositol transfer protein	Source:UniProtKB/TrEMBL;Acc:A0A5K4FAB3]	schistosoma_mansoni_prjea36577	Phosphatidylinositol transfer protein [Source:UniProtKB/TrEMBL;Acc:A0A5K4FAB3]			SM_V10_3
0.51	0.0225699	0.02	0.0325615	0.033	0.013	Muscle 1	Smp_345310	HMG box domain-containing protein	Source:UniProtKB/TrEMBL;Acc:A0A5K4FDJ3]	schistosoma_mansoni_prjea36577	HMG box domain-containing protein [Source:UniProtKB/TrEMBL;Acc:A0A5K4FDJ3]			SM_V10_3
0.51	0.0197927	0.02	0.0285549	0.123	0.104	Muscle 1	Smp_063640	Putative g-protein, beta subunit	Source:UniProtKB/TrEMBL;Acc:G4VA12]	schistosoma_mansoni_prjea36577	Putative g-protein, beta subunit [Source:UniProtKB/TrEMBL;Acc:G4VA12]			SM_V10_2
0.51	0.0190111	0.02	0.0274273	0.066	0.046	Muscle 1	Smp_129670	Apoptosis stimulating of P53, putative	Source:UniProtKB/TrEMBL;Acc:A0A5K4EMI6]	schistosoma_mansoni_prjea36577	Apoptosis stimulating of P53, putative [Source:UniProtKB/TrEMBL;Acc:A0A5K4EMI6]			SM_V10_2
0.51	0.0251316	0.02	0.0362572	0.124	0.104	Muscle 1	Smp_124440	Putative glycerol kinase	Source:UniProtKB/TrEMBL;Acc:A0A3Q0KKS7]	schistosoma_mansoni_prjea36577	Putative glycerol kinase [Source:UniProtKB/TrEMBL;Acc:A0A3Q0KKS7]			SM_V10_2
0.51	0.0205648	0.02	0.0296687	0.027	0.007	Muscle 1	Smp_245680	Nephrin related	Source:UniProtKB/TrEMBL;Acc:A0A5K4F0U6]	schistosoma_mansoni_prjea36577	Nephrin related [Source:UniProtKB/TrEMBL;Acc:A0A5K4F0U6]			SM_V10_2
0.51	0.0199542	0.02	0.0287878	0.123	0.103	Muscle 1	Smp_047900	Mitogen-activated protein kinase	Source:UniProtKB/TrEMBL;Acc:A0A3Q0KFK2]	schistosoma_mansoni_prjea36577	Mitogen-activated protein kinase [Source:UniProtKB/TrEMBL;Acc:A0A3Q0KFK2]			SM_V10_2
0.51	0.0203084	0.02	0.0292988	0.025	0.005	Muscle 1	Smp_176950	RING-type domain-containing protein	Source:UniProtKB/TrEMBL;Acc:A0A3Q0KU30]	schistosoma_mansoni_prjea36577	RING-type domain-containing protein [Source:UniProtKB/TrEMBL;Acc:A0A3Q0KU30]			SM_V10_1
0.51	0.0244035	0.02	0.0352068	0.102	0.082	Muscle 1	Smp_072180	BCL domain-containing protein	Source:UniProtKB/TrEMBL;Acc:G4V9D2]	schistosoma_mansoni_prjea36577	BCL domain-containing protein [Source:UniProtKB/TrEMBL;Acc:G4V9D2]			SM_V10_1
0.51	0.0252505	0.02	0.0364288	0.122	0.103	Muscle 1	Smp_093630	Mitochondrial carrier protein-related	Source:UniProtKB/TrEMBL;Acc:G4V9Q6]	schistosoma_mansoni_prjea36577	Mitochondrial carrier protein-related [Source:UniProtKB/TrEMBL;Acc:G4V9Q6]			SM_V10_1
0.51	0.0203955	0.02	0.0294246	0.045	0.024	Muscle 1	Smp_170290	Neuronal differentiation protein	Source:UniProtKB/TrEMBL;Acc:G4V8A2]	schistosoma_mansoni_prjea36577	Neuronal differentiation protein [Source:UniProtKB/TrEMBL;Acc:G4V8A2]			SM_V10_1
0.51	0.0318427	0.02	0.0459393	0.239	0.224	Muscle 1	Smp_213790	Cysteine protease	Source:UniProtKB/TrEMBL;Acc:A0A5K4F0K1]	schistosoma_mansoni_prjea36577	Cysteine protease [Source:UniProtKB/TrEMBL;Acc:A0A5K4F0K1]			SM_V10_1
0.51	0.0255888	0.02	0.0369168	0.159	0.141	Muscle 1	Smp_341860	Ribosomal_L7Ae domain-containing protein	Source:UniProtKB/TrEMBL;Acc:A0A5K4FCA0]	schistosoma_mansoni_prjea36577	Ribosomal_L7Ae domain-containing protein [Source:UniProtKB/TrEMBL;Acc:A0A5K4FCA0]			SM_V10_1
0.51	0.0175356	0.02	0.0252985	0.076	0.056	Muscle 1	Smp_007210	Putative rab6 gtpase activating protein, gapcena (Rabgap1 protein)	Source:UniProtKB/TrEMBL;Acc:A0A5K4E925]	schistosoma_mansoni_prjea36577	Putative rab6 gtpase activating protein, gapcena (Rabgap1 protein) [Source:UniProtKB/TrEMBL;Acc:A0A5K4E925]			SM_V10_1
0.51	0.0275448	0.02	0.0397388	0.135	0.116	Muscle 1	Smp_033620	Transmembrane protein	Source:UniProtKB/TrEMBL;Acc:G4LVB1]	schistosoma_mansoni_prjea36577	Transmembrane protein [Source:UniProtKB/TrEMBL;Acc:G4LVB1]			SM_V10_1
0.51	0.0229157	0.02	0.0330604	0.024	0.005	Muscle 1	Smp_012920	G_PROTEIN_RECEP_F1_2 domain-containing protein	Source:UniProtKB/TrEMBL;Acc:A0A3Q0KCG8]	schistosoma_mansoni_prjea36577	G_PROTEIN_RECEP_F1_2 domain-containing protein [Source:UniProtKB/TrEMBL;Acc:A0A3Q0KCG8]			SM_V10_1
0.51	0.0203778	0.02	0.029399	0.067	0.046	Muscle 1	Smp_093220	ANK_REP_REGION domain-containing protein	Source:UniProtKB/TrEMBL;Acc:A0A3Q0KJ74]	schistosoma_mansoni_prjea36577	ANK_REP_REGION domain-containing protein [Source:UniProtKB/TrEMBL;Acc:A0A3Q0KJ74]			SM_V10_1
0.51	0.0183157	0.02	0.026424	0.154	0.133	Muscle 1	Smp_019920	Smp_019920	Smp_019920~	schistosoma_mansoni_prjea36577				SM_V10_1
0.51	0.0237194	0.02	0.0342199	0.054	0.035	Muscle 1	Smp_310240	Smp_310240	Smp_310240~	schistosoma_mansoni_prjea36577				SM_V10_1
0.51	0.0187598	0.02	0.0270646	0.198	0.178	Muscle 1	Smp_035470	Dolichyl-diphosphooligosaccharide--protein glycosyltransferase 48 kDa subunit	Source:UniProtKB/TrEMBL;Acc:G4V7R9]	schistosoma_mansoni_prjea36577	Dolichyl-diphosphooligosaccharide--protein glycosyltransferase 48 kDa subunit [Source:UniProtKB/TrEMBL;Acc:G4V7R9]			SM_V10_1
0.51	0.0311818	0.02	0.0449858	0.232	0.214	Muscle 1	Smp_073600	Putative platelet-activating factor acetylhydrolase ib	Source:UniProtKB/TrEMBL;Acc:A0A3Q0KHP9]	schistosoma_mansoni_prjea36577	Putative platelet-activating factor acetylhydrolase ib [Source:UniProtKB/TrEMBL;Acc:A0A3Q0KHP9]			SM_V10_1
0.51	0.0199763	0.02	0.0288197	0.127	0.107	Muscle 1	Smp_164210	Synaptosomal-associated protein	Source:UniProtKB/TrEMBL;Acc:A0A3Q0KRU9]	schistosoma_mansoni_prjea36577	Synaptosomal-associated protein [Source:UniProtKB/TrEMBL;Acc:A0A3Q0KRU9]			SM_V10_1
0.49	0.00264435	0.02	0.00381499	0.367	0.402	Muscle 1	Smp_074950	RWD domain-containing protein	Source:UniProtKB/TrEMBL;Acc:G4VH13]	schistosoma_mansoni_prjea36577	RWD domain-containing protein [Source:UniProtKB/TrEMBL;Acc:G4VH13]			SM_V10_3
0.509	0.0158915	0.018	0.0229266	0.029	0.012	Muscle 1	Smp_146250	alpha-L-fucosidase	Source:UniProtKB/TrEMBL;Acc:A0A3Q0KP50]	schistosoma_mansoni_prjea36577	alpha-L-fucosidase [Source:UniProtKB/TrEMBL;Acc:A0A3Q0KP50]			SM_V10_Z
0.509	0.0174612	0.018	0.0251912	0.042	0.024	Muscle 1	Smp_076030	Putative transducer of erbb2 (Tob)	Source:UniProtKB/TrEMBL;Acc:G4VSU0]	schistosoma_mansoni_prjea36577	Putative transducer of erbb2 (Tob) [Source:UniProtKB/TrEMBL;Acc:G4VSU0]			SM_V10_Z
0.509	0.0137626	0.018	0.0198552	0.065	0.046	Muscle 1	Smp_243910	Transmembrane 9 superfamily member	Source:UniProtKB/TrEMBL;Acc:A0A5K4F0B1]	schistosoma_mansoni_prjea36577	Transmembrane 9 superfamily member [Source:UniProtKB/TrEMBL;Acc:A0A5K4F0B1]			SM_V10_Z
0.509	0.017714	0.018	0.0255559	0.032	0.015	Muscle 1	Smp_244010	protein kinase C	Source:UniProtKB/TrEMBL;Acc:A0A5K4F035]	schistosoma_mansoni_prjea36577	protein kinase C [Source:UniProtKB/TrEMBL;Acc:A0A5K4F035]			SM_V10_Z
0.509	0.0160268	0.018	0.0231217	0.069	0.051	Muscle 1	Smp_304370	non-specific serine/threonine protein kinase	Source:UniProtKB/TrEMBL;Acc:A0A5K4F2H9]	schistosoma_mansoni_prjea36577	non-specific serine/threonine protein kinase [Source:UniProtKB/TrEMBL;Acc:A0A5K4F2H9]			SM_V10_Z
0.509	0.0182493	0.018	0.0263282	0.028	0.009	Muscle 1	Smp_176540	Putative cadherin	Source:UniProtKB/TrEMBL;Acc:A0A3Q0KTJ1]	schistosoma_mansoni_prjea36577	Putative cadherin [Source:UniProtKB/TrEMBL;Acc:A0A3Q0KTJ1]			SM_V10_Z
0.509	0.0195311	0.018	0.0281774	0.053	0.034	Muscle 1	Smp_046130	Putative alpha-actinin	Source:UniProtKB/TrEMBL;Acc:A0A3Q0KFD5]	schistosoma_mansoni_prjea36577	Putative alpha-actinin [Source:UniProtKB/TrEMBL;Acc:A0A3Q0KFD5]			SM_V10_Z
0.509	0.0179809	0.018	0.025941	0.018	0.001	Muscle 1	Smp_131980	G_PROTEIN_RECEP_F1_2 domain-containing protein	Source:UniProtKB/TrEMBL;Acc:A0A3Q0KLV1]	schistosoma_mansoni_prjea36577	G_PROTEIN_RECEP_F1_2 domain-containing protein [Source:UniProtKB/TrEMBL;Acc:A0A3Q0KLV1]			SM_V10_Z
0.509	0.0227041	0.018	0.0327551	0.071	0.053	Muscle 1	Smp_340310	alpha-1,2-Mannosidase	Source:UniProtKB/TrEMBL;Acc:A0A5K4FDY5]	schistosoma_mansoni_prjea36577	alpha-1,2-Mannosidase [Source:UniProtKB/TrEMBL;Acc:A0A5K4FDY5]			SM_V10_Z
0.509	0.00375839	0.018	0.00542222	0.077	0.057	Muscle 1	Smp_153640	PDEase domain-containing protein	Source:UniProtKB/TrEMBL;Acc:A0A5K4ESG3]	schistosoma_mansoni_prjea36577	PDEase domain-containing protein [Source:UniProtKB/TrEMBL;Acc:A0A5K4ESG3]	PDE7var	UniProtKB Gene Name	SM_V10_Z
0.509	0.0348955	0.018	0.0503435	0.199	0.185	Muscle 1	Smp_333040	28S ribosomal protein S9, mitochondrial	Source:UniProtKB/TrEMBL;Acc:A0A5K4F8E7]	schistosoma_mansoni_prjea36577	28S ribosomal protein S9, mitochondrial [Source:UniProtKB/TrEMBL;Acc:A0A5K4F8E7]			SM_V10_Z
0.509	0.0196051	0.018	0.0282842	0.022	0.003	Muscle 1	Smp_169150	Transient receptor potential channel,putative	Source:UniProtKB/TrEMBL;Acc:A0A3Q0KSH8]	schistosoma_mansoni_prjea36577	Transient receptor potential channel,putative [Source:UniProtKB/TrEMBL;Acc:A0A3Q0KSH8]			SM_V10_Z
0.509	0.0207181	0.018	0.0298899	0.282	0.266	Muscle 1	Smp_349130	MICOS complex subunit MIC13	Source:UniProtKB/TrEMBL;Acc:Q27260]	schistosoma_mansoni_prjea36577	MICOS complex subunit MIC13 [Source:UniProtKB/TrEMBL;Acc:Q27260]			SM_V10_Z
0.509	0.0186001	0.018	0.0268342	0.03	0.012	Muscle 1	Smp_343310	Tensin-1	Source:UniProtKB/TrEMBL;Acc:A0A5K4FF32]	schistosoma_mansoni_prjea36577	Tensin-1 [Source:UniProtKB/TrEMBL;Acc:A0A5K4FF32]			SM_V10_7
0.509	0.0197357	0.018	0.0284726	0.029	0.01	Muscle 1	Smp_125080	Mername-AA217 hypothetical peptidase (M14 family)	Source:UniProtKB/TrEMBL;Acc:A0A3Q0KKU3]	schistosoma_mansoni_prjea36577	Mername-AA217 hypothetical peptidase (M14 family) [Source:UniProtKB/TrEMBL;Acc:A0A3Q0KKU3]			SM_V10_7
0.509	0.0156841	0.018	0.0226274	0.597	0.596	Muscle 1	Smp_134510	ATPase inhibitor	Source:UniProtKB/TrEMBL;Acc:G4VN13]	schistosoma_mansoni_prjea36577	ATPase inhibitor [Source:UniProtKB/TrEMBL;Acc:G4VN13]			SM_V10_7
0.509	0.0223608	0.018	0.0322599	0.116	0.098	Muscle 1	Smp_202980	Smp_202980	Source:UniProtKB/TrEMBL;Acc:G4VLY5]	schistosoma_mansoni_prjea36577	Smp_202980 [Source:UniProtKB/TrEMBL;Acc:G4VLY5]			SM_V10_6
0.509	0.0422281	0.018	0.0609223	0.333	0.328	Muscle 1	Smp_123070	Ribonuclease P protein component 4	Source:UniProtKB/TrEMBL;Acc:G4VLF9]	schistosoma_mansoni_prjea36577	Ribonuclease P protein component 4 [Source:UniProtKB/TrEMBL;Acc:G4VLF9]			SM_V10_6
0.509	0.0413452	0.018	0.0596485	0.49	0.497	Muscle 1	Smp_154530	ATP synthase subunit b	Source:UniProtKB/TrEMBL;Acc:G4VJX8]	schistosoma_mansoni_prjea36577	ATP synthase subunit b [Source:UniProtKB/TrEMBL;Acc:G4VJX8]			SM_V10_5
0.509	0.0178093	0.018	0.0256934	0.022	0.004	Muscle 1	Smp_266920	Junctophilin-1	Source:UniProtKB/TrEMBL;Acc:A0A5K4F4Q1]	schistosoma_mansoni_prjea36577	Junctophilin-1 [Source:UniProtKB/TrEMBL;Acc:A0A5K4F4Q1]			SM_V10_5
0.509	0.015759	0.018	0.0227354	0.083	0.065	Muscle 1	Smp_151050	MATH domain-containing protein	Source:UniProtKB/TrEMBL;Acc:A0A3Q0KPW3]	schistosoma_mansoni_prjea36577	MATH domain-containing protein [Source:UniProtKB/TrEMBL;Acc:A0A3Q0KPW3]			SM_V10_4
0.509	0.0184317	0.018	0.0265913	0.042	0.024	Muscle 1	Smp_027400	Tyrosine-protein kinase	Source:UniProtKB/TrEMBL;Acc:G4VHA4]	schistosoma_mansoni_prjea36577	Tyrosine-protein kinase [Source:UniProtKB/TrEMBL;Acc:G4VHA4]			SM_V10_4
0.509	0.0234572	0.018	0.0338416	0.126	0.109	Muscle 1	Smp_095680	Zinc finger protein, putative	Source:UniProtKB/TrEMBL;Acc:G4M0Z5]	schistosoma_mansoni_prjea36577	Zinc finger protein, putative [Source:UniProtKB/TrEMBL;Acc:G4M0Z5]			SM_V10_4
0.509	0.0177447	0.018	0.0256003	0.052	0.034	Muscle 1	Smp_009070	Putative zinc finger protein	Source:UniProtKB/TrEMBL;Acc:A0A3Q0KC57]	schistosoma_mansoni_prjea36577	Putative zinc finger protein [Source:UniProtKB/TrEMBL;Acc:A0A3Q0KC57]			SM_V10_4
0.509	0.0175472	0.018	0.0253153	0.023	0.005	Muscle 1	Smp_334140	Ras-associating domain-containing protein	Source:UniProtKB/TrEMBL;Acc:A0A5K4FAD1]	schistosoma_mansoni_prjea36577	Ras-associating domain-containing protein [Source:UniProtKB/TrEMBL;Acc:A0A5K4FAD1]			SM_V10_4
0.509	0.0148613	0.018	0.0214403	0.049	0.031	Muscle 1	Smp_036020	Ig-like domain-containing protein	Source:UniProtKB/TrEMBL;Acc:A0A5K4ECL2]	schistosoma_mansoni_prjea36577	Ig-like domain-containing protein [Source:UniProtKB/TrEMBL;Acc:A0A5K4ECL2]			SM_V10_4
0.509	0.0175423	0.018	0.0253081	0.074	0.057	Muscle 1	Smp_150680	tryptophan--tRNA ligase	Source:UniProtKB/TrEMBL;Acc:G4LXR8]	schistosoma_mansoni_prjea36577	tryptophan--tRNA ligase [Source:UniProtKB/TrEMBL;Acc:G4LXR8]			SM_V10_4
0.509	0.0203126	0.018	0.0293049	0.065	0.047	Muscle 1	Smp_122680	Putative oligophrenin	Source:UniProtKB/TrEMBL;Acc:A0A3Q0KKG2]	schistosoma_mansoni_prjea36577	Putative oligophrenin [Source:UniProtKB/TrEMBL;Acc:A0A3Q0KKG2]			SM_V10_3
0.509	0.0206907	0.018	0.0298504	0.099	0.08	Muscle 1	Smp_123490	Nicotinamide-nucleotide adenylyltransferase	Source:UniProtKB/TrEMBL;Acc:A0A3Q0KKL9]	schistosoma_mansoni_prjea36577	Nicotinamide-nucleotide adenylyltransferase [Source:UniProtKB/TrEMBL;Acc:A0A3Q0KKL9]			SM_V10_3
0.509	0.0188519	0.018	0.0271975	0.079	0.06	Muscle 1	Smp_308420	Smp_308420	Smp_308420~	schistosoma_mansoni_prjea36577				SM_V10_3
0.509	0.0199033	0.018	0.0287143	0.019	0	Muscle 1	Smp_004440	NXPE family member 3-like	Source:UniProtKB/TrEMBL;Acc:A0A3Q0KBR3]	schistosoma_mansoni_prjea36577	NXPE family member 3-like [Source:UniProtKB/TrEMBL;Acc:A0A3Q0KBR3]			SM_V10_3
0.509	0.0155561	0.018	0.0224427	0.057	0.039	Muscle 1	Smp_159990	Voltage-dependent L-type calcium channel subunit alpha	Source:UniProtKB/TrEMBL;Acc:A0A3Q0KR84]	schistosoma_mansoni_prjea36577	Voltage-dependent L-type calcium channel subunit alpha [Source:UniProtKB/TrEMBL;Acc:A0A3Q0KR84]			SM_V10_3
0.509	0.0188078	0.018	0.027134	0.018	0.001	Muscle 1	Smp_350090	Amine GPCR, putative	Source:UniProtKB/TrEMBL;Acc:A0A3Q0KK97]	schistosoma_mansoni_prjea36577	Amine GPCR, putative [Source:UniProtKB/TrEMBL;Acc:A0A3Q0KK97]			SM_V10_3
0.509	0.0161225	0.018	0.0232598	0.072	0.054	Muscle 1	Smp_170450	Sodium/potassium/calcium exchanger 4	Source:UniProtKB/TrEMBL;Acc:G4VDQ6]	schistosoma_mansoni_prjea36577	Sodium/potassium/calcium exchanger 4 [Source:UniProtKB/TrEMBL;Acc:G4VDQ6]			SM_V10_2
0.509	0.0260976	0.018	0.0376508	0.196	0.181	Muscle 1	Smp_062260	uridine/cytidine kinase	Source:UniProtKB/TrEMBL;Acc:G4LVP0]	schistosoma_mansoni_prjea36577	uridine/cytidine kinase [Source:UniProtKB/TrEMBL;Acc:G4LVP0]			SM_V10_2
0.509	0.0193705	0.018	0.0279458	0.035	0.016	Muscle 1	Smp_245850	G_PROTEIN_RECEP_F1_2 domain-containing protein	Source:UniProtKB/TrEMBL;Acc:A0A5K4F2A2]	schistosoma_mansoni_prjea36577	G_PROTEIN_RECEP_F1_2 domain-containing protein [Source:UniProtKB/TrEMBL;Acc:A0A5K4F2A2]			SM_V10_2
0.509	0.0212094	0.018	0.0305987	0.075	0.057	Muscle 1	Smp_017290	Signal recognition particle receptor subunit beta	Source:UniProtKB/TrEMBL;Acc:A0A5K4EA31]	schistosoma_mansoni_prjea36577	Signal recognition particle receptor subunit beta [Source:UniProtKB/TrEMBL;Acc:A0A5K4EA31]			SM_V10_2
0.509	0.0167822	0.018	0.0242115	0.049	0.032	Muscle 1	Smp_001420	Gh regulated tbc protein-1, putative	Source:UniProtKB/TrEMBL;Acc:A0A3Q0KBH2]	schistosoma_mansoni_prjea36577	Gh regulated tbc protein-1, putative [Source:UniProtKB/TrEMBL;Acc:A0A3Q0KBH2]			SM_V10_2
0.509	0.0171251	0.018	0.0247063	0.04	0.022	Muscle 1	Smp_332710	Cyclic nucleotide-binding domain-containing protein	Source:UniProtKB/TrEMBL;Acc:A0A5K4FAL2]	schistosoma_mansoni_prjea36577	Cyclic nucleotide-binding domain-containing protein [Source:UniProtKB/TrEMBL;Acc:A0A5K4FAL2]			SM_V10_1
0.509	0.0206643	0.018	0.0298123	0.023	0.006	Muscle 1	Smp_161500	Rhodopsin-like orphan GPCR, putative	Source:UniProtKB/TrEMBL;Acc:A0A3Q0KR98]	schistosoma_mansoni_prjea36577	Rhodopsin-like orphan GPCR, putative [Source:UniProtKB/TrEMBL;Acc:A0A3Q0KR98]			SM_V10_1
0.509	0.00840682	0.018	0.0121285	0.067	0.049	Muscle 1	Smp_154730	Rna-binding protein musashi-related	Source:UniProtKB/TrEMBL;Acc:A0A5K4ET69]	schistosoma_mansoni_prjea36577	Rna-binding protein musashi-related [Source:UniProtKB/TrEMBL;Acc:A0A5K4ET69]			SM_V10_1
0.509	0.0179369	0.018	0.0258775	0.059	0.04	Muscle 1	Smp_036180	Diacylglycerol kinase	Source:UniProtKB/TrEMBL;Acc:G4V6E6]	schistosoma_mansoni_prjea36577	Diacylglycerol kinase [Source:UniProtKB/TrEMBL;Acc:G4V6E6]			SM_V10_1
0.509	0.0131704	0.018	0.0190009	0.051	0.033	Muscle 1	Smp_337580	MAGUK p55 subfamily member 6-like	Source:UniProtKB/TrEMBL;Acc:A0A5K4FDP7]	schistosoma_mansoni_prjea36577	MAGUK p55 subfamily member 6-like [Source:UniProtKB/TrEMBL;Acc:A0A5K4FDP7]			SM_V10_1
0.509	0.0171651	0.018	0.024764	0.057	0.039	Muscle 1	Smp_210770	Putative vacuolar protein sorting 26, vps26	Source:UniProtKB/TrEMBL;Acc:A0A3Q0KV94]	schistosoma_mansoni_prjea36577	Putative vacuolar protein sorting 26, vps26 [Source:UniProtKB/TrEMBL;Acc:A0A3Q0KV94]			SM_V10_1
0.509	0.0233484	0.018	0.0336847	0.03	0.012	Muscle 1	Smp_081250	Putative voltage-gated potassium channel	Source:UniProtKB/TrEMBL;Acc:G4V8N9]	schistosoma_mansoni_prjea36577	Putative voltage-gated potassium channel [Source:UniProtKB/TrEMBL;Acc:G4V8N9]			SM_V10_1
0.509	0.0150429	0.018	0.0217023	0.073	0.054	Muscle 1	Smp_150750	Centriolin	Source:UniProtKB/TrEMBL;Acc:A0A3Q0KPU8]	schistosoma_mansoni_prjea36577	Centriolin [Source:UniProtKB/TrEMBL;Acc:A0A3Q0KPU8]			SM_V10_1
0.509	0.0130344	0.018	0.0188047	0.05	0.032	Muscle 1	Smp_079420	Putative ank repeat-containing	Source:UniProtKB/TrEMBL;Acc:G4V795]	schistosoma_mansoni_prjea36577	Putative ank repeat-containing [Source:UniProtKB/TrEMBL;Acc:G4V795]			SM_V10_1
0.509	0.0174615	0.018	0.0251917	0.035	0.018	Muscle 1	Smp_124240	Putative sodium/potassium-dependent atpase beta subunit; Sodium/potassium ATPase1 beta subunit	Source:UniProtKB/TrEMBL;Acc:A0A3Q0KKR2]	schistosoma_mansoni_prjea36577	Putative sodium/potassium-dependent atpase beta subunit; Sodium/potassium ATPase1 beta subunit [Source:UniProtKB/TrEMBL;Acc:A0A3Q0KKR2]			SM_V10_1
0.491	0.00054185	0.018	0.00078173	0.344	0.371	Muscle 1	Smp_071640	Putative arginine/serine-rich splicing factor	Source:UniProtKB/TrEMBL;Acc:G4VRU2]	schistosoma_mansoni_prjea36577	Putative arginine/serine-rich splicing factor [Source:UniProtKB/TrEMBL;Acc:G4VRU2]			SM_V10_Z
0.508	0.0165753	0.016	0.0239131	0.12	0.104	Muscle 1	Smp_205840	Nudix hydrolase domain-containing protein	Source:UniProtKB/TrEMBL;Acc:A0A5K4EZL4]	schistosoma_mansoni_prjea36577	Nudix hydrolase domain-containing protein [Source:UniProtKB/TrEMBL;Acc:A0A5K4EZL4]			SM_V10_Z
0.508	0.0168466	0.016	0.0243045	0.063	0.046	Muscle 1	Smp_176580	Serine/threonine kinase	Source:UniProtKB/TrEMBL;Acc:A0A5K4EWT7]	schistosoma_mansoni_prjea36577	Serine/threonine kinase [Source:UniProtKB/TrEMBL;Acc:A0A5K4EWT7]			SM_V10_Z
0.508	0.0141969	0.016	0.0204819	0.031	0.015	Muscle 1	Smp_244320	Serine/threonine-protein kinase DDB_G0282963	Source:UniProtKB/TrEMBL;Acc:A0A5K4F1P6]	schistosoma_mansoni_prjea36577	Serine/threonine-protein kinase DDB_G0282963 [Source:UniProtKB/TrEMBL;Acc:A0A5K4F1P6]			SM_V10_Z
0.508	0.0215357	0.016	0.0310694	0.282	0.27	Muscle 1	Smp_046020	Protein phosphatase 1 regulatory subunit 7	Source:UniProtKB/TrEMBL;Acc:G4VPR7]	schistosoma_mansoni_prjea36577	Protein phosphatase 1 regulatory subunit 7 [Source:UniProtKB/TrEMBL;Acc:G4VPR7]			SM_V10_Z
0.508	0.0250411	0.016	0.0361267	0.096	0.081	Muscle 1	Smp_323040	Bladder cancer-associated protein	Source:UniProtKB/TrEMBL;Acc:A0A146MGI0]	schistosoma_mansoni_prjea36577	Bladder cancer-associated protein [Source:UniProtKB/TrEMBL;Acc:A0A146MGI0]			SM_V10_Z
0.508	0.0254917	0.016	0.0367767	0.149	0.134	Muscle 1	Smp_210540	Cysteine-rich PDZ-binding protein	Source:UniProtKB/TrEMBL;Acc:A0A3Q0KVA2]	schistosoma_mansoni_prjea36577	Cysteine-rich PDZ-binding protein [Source:UniProtKB/TrEMBL;Acc:A0A3Q0KVA2]			SM_V10_Z
0.508	0.0160952	0.016	0.0232205	0.016	0	Muscle 1	Smp_342810	Smp_342810	Smp_342810~	schistosoma_mansoni_prjea36577				SM_V10_Z
0.508	0.0168739	0.016	0.0243439	0.039	0.022	Muscle 1	Smp_244860	TLC domain-containing protein	Source:UniProtKB/TrEMBL;Acc:A0A5K4F1J5]	schistosoma_mansoni_prjea36577	TLC domain-containing protein [Source:UniProtKB/TrEMBL;Acc:A0A5K4F1J5]			SM_V10_Z
0.508	0.0328711	0.016	0.047423	0.374	0.369	Muscle 1	Smp_019750	ATP synthase subunit d, mitochondrial	Source:UniProtKB/TrEMBL;Acc:G4LYX7]	schistosoma_mansoni_prjea36577	ATP synthase subunit d, mitochondrial [Source:UniProtKB/TrEMBL;Acc:G4LYX7]			SM_V10_Z
0.508	0.00442514	0.016	0.00638412	0.094	0.076	Muscle 1	Smp_019640	Calcyphosine/tpp, putative	Source:UniProtKB/TrEMBL;Acc:C4Q2F2]	schistosoma_mansoni_prjea36577	Calcyphosine/tpp, putative [Source:UniProtKB/TrEMBL;Acc:C4Q2F2]			SM_V10_Z
0.508	0.016224	0.016	0.0234062	0.021	0.006	Muscle 1	Smp_141810	PH domain-containing protein	Source:UniProtKB/TrEMBL;Acc:A0A3Q0KNF7]	schistosoma_mansoni_prjea36577	PH domain-containing protein [Source:UniProtKB/TrEMBL;Acc:A0A3Q0KNF7]			SM_V10_Z
0.508	0.0191128	0.016	0.0275739	0.075	0.058	Muscle 1	Smp_245260	Methionine aminopeptidase	Source:UniProtKB/TrEMBL;Acc:A0A5K4F1Q3]	schistosoma_mansoni_prjea36577	Methionine aminopeptidase [Source:UniProtKB/TrEMBL;Acc:A0A5K4F1Q3]			SM_V10_Z
0.508	0.0148922	0.016	0.0214849	0.039	0.023	Muscle 1	Smp_171600	protein-tyrosine-phosphatase	Source:UniProtKB/TrEMBL;Acc:A0A3Q0KT84]	schistosoma_mansoni_prjea36577	protein-tyrosine-phosphatase [Source:UniProtKB/TrEMBL;Acc:A0A3Q0KT84]			SM_V10_Z
0.508	0.0131204	0.016	0.0189288	0.125	0.11	Muscle 1	Smp_164820	Smp_164820	Smp_164820~	schistosoma_mansoni_prjea36577				SM_V10_Z
0.508	0.0123237	0.016	0.0177793	0.067	0.052	Muscle 1	Smp_169480	BAH domain-containing protein	Source:UniProtKB/TrEMBL;Acc:A0A5K4F5G8]	schistosoma_mansoni_prjea36577	BAH domain-containing protein [Source:UniProtKB/TrEMBL;Acc:A0A5K4F5G8]			SM_V10_Z
0.508	0.0160284	0.016	0.0231241	0.042	0.026	Muscle 1	Smp_334980	Rap guanine nucleotide exchange factor 4	Source:UniProtKB/TrEMBL;Acc:A0A5K4F996]	schistosoma_mansoni_prjea36577	Rap guanine nucleotide exchange factor 4 [Source:UniProtKB/TrEMBL;Acc:A0A5K4F996]			SM_V10_Z
0.508	0.0169531	0.016	0.0244582	0.25	0.235	Muscle 1	Smp_015850	RNA-binding protein Luc7-like 2	Source:UniProtKB/TrEMBL;Acc:G4VSN5]	schistosoma_mansoni_prjea36577	RNA-binding protein Luc7-like 2 [Source:UniProtKB/TrEMBL;Acc:G4VSN5]			SM_V10_Z
0.508	0.0151949	0.016	0.0219216	0.019	0.003	Muscle 1	Smp_348730	Smp_348730	Smp_348730~	schistosoma_mansoni_prjea36577				SM_V10_WSR
0.508	0.0108786	0.016	0.0156945	0.074	0.058	Muscle 1	Smp_125160	Frizzled domain-containing protein	Source:UniProtKB/TrEMBL;Acc:A0A3Q0KKV2]	schistosoma_mansoni_prjea36577	Frizzled domain-containing protein [Source:UniProtKB/TrEMBL;Acc:A0A3Q0KKV2]			SM_V10_7
0.508	0.0156151	0.016	0.0225278	0.046	0.031	Muscle 1	Smp_041370	ZP domain-containing protein	Source:UniProtKB/TrEMBL;Acc:A0A3Q0KEU8]	schistosoma_mansoni_prjea36577	ZP domain-containing protein [Source:UniProtKB/TrEMBL;Acc:A0A3Q0KEU8]			SM_V10_7
0.508	0.0153267	0.016	0.0221118	0.058	0.042	Muscle 1	Smp_010620	DUF1907 domain-containing protein	Source:UniProtKB/TrEMBL;Acc:A0A3Q0KC96]	schistosoma_mansoni_prjea36577	DUF1907 domain-containing protein [Source:UniProtKB/TrEMBL;Acc:A0A3Q0KC96]			SM_V10_7
0.508	0.0164025	0.016	0.0236638	0.09	0.075	Muscle 1	Smp_318120	AAA domain-containing protein	Source:UniProtKB/TrEMBL;Acc:A0A5K4F6D3]	schistosoma_mansoni_prjea36577	AAA domain-containing protein [Source:UniProtKB/TrEMBL;Acc:A0A5K4F6D3]			SM_V10_7
0.508	0.0167526	0.016	0.024169	0.051	0.036	Muscle 1	Smp_104310	Rab11, putative	Source:UniProtKB/TrEMBL;Acc:G4M0X0]	schistosoma_mansoni_prjea36577	Rab11, putative [Source:UniProtKB/TrEMBL;Acc:G4M0X0]			SM_V10_7
0.508	0.0130691	0.016	0.0188547	0.208	0.193	Muscle 1	Smp_154250	Putative unkempt protein	Source:UniProtKB/TrEMBL;Acc:A0A3Q0KQD0]	schistosoma_mansoni_prjea36577	Putative unkempt protein [Source:UniProtKB/TrEMBL;Acc:A0A3Q0KQD0]			SM_V10_6
0.508	0.0182077	0.016	0.0262681	0.106	0.088	Muscle 1	Smp_091730	Putative sorting nexin	Source:UniProtKB/TrEMBL;Acc:G4VLM8]	schistosoma_mansoni_prjea36577	Putative sorting nexin [Source:UniProtKB/TrEMBL;Acc:G4VLM8]			SM_V10_6
0.508	0.0143832	0.016	0.0207506	0.043	0.028	Muscle 1	Smp_143690	Feline leukemia virus subgroup C receptor-related	Source:UniProtKB/TrEMBL;Acc:A0A3Q0KNQ1]	schistosoma_mansoni_prjea36577	Feline leukemia virus subgroup C receptor-related [Source:UniProtKB/TrEMBL;Acc:A0A3Q0KNQ1]			SM_V10_5
0.508	0.0176384	0.016	0.0254468	0.083	0.067	Muscle 1	Smp_058140	Protein-L-isoaspartate O-methyltransferase	Source:UniProtKB/TrEMBL;Acc:G4VK45]	schistosoma_mansoni_prjea36577	Protein-L-isoaspartate O-methyltransferase [Source:UniProtKB/TrEMBL;Acc:G4VK45]			SM_V10_5
0.508	0.00565641	0.016	0.00816047	0.152	0.136	Muscle 1	Smp_136240	Putative vesicle-associated membrane protein (Vamp)	Source:UniProtKB/TrEMBL;Acc:G4VKP4]	schistosoma_mansoni_prjea36577	Putative vesicle-associated membrane protein (Vamp) [Source:UniProtKB/TrEMBL;Acc:G4VKP4]			SM_V10_5
0.508	0.0207826	0.016	0.0299829	0.099	0.083	Muscle 1	Smp_314320	GST N-terminal domain-containing protein	Source:UniProtKB/TrEMBL;Acc:A0A5K4F3L7]	schistosoma_mansoni_prjea36577	GST N-terminal domain-containing protein [Source:UniProtKB/TrEMBL;Acc:A0A5K4F3L7]			SM_V10_5
0.508	0.0160371	0.016	0.0231366	0.048	0.032	Muscle 1	Smp_267010	Ig-like domain-containing protein	Source:UniProtKB/TrEMBL;Acc:A0A5K4F4R1]	schistosoma_mansoni_prjea36577	Ig-like domain-containing protein [Source:UniProtKB/TrEMBL;Acc:A0A5K4F4R1]			SM_V10_4
0.508	0.0126477	0.016	0.0182468	0.06	0.043	Muscle 1	Smp_055130	Putative zinc finger protein	Source:UniProtKB/TrEMBL;Acc:G4VH72]	schistosoma_mansoni_prjea36577	Putative zinc finger protein [Source:UniProtKB/TrEMBL;Acc:G4VH72]			SM_V10_4
0.508	0.0175079	0.016	0.0252586	0.13	0.113	Muscle 1	Smp_341800	Ras suppressor protein 1	Source:UniProtKB/TrEMBL;Acc:A0A5K4FEG8]	schistosoma_mansoni_prjea36577	Ras suppressor protein 1 [Source:UniProtKB/TrEMBL;Acc:A0A5K4FEG8]			SM_V10_4
0.508	0.00751851	0.016	0.0108469	0.072	0.055	Muscle 1	Smp_043210	Putative tetraspanin	Source:UniProtKB/TrEMBL;Acc:A0A3Q0KF36]	schistosoma_mansoni_prjea36577	Putative tetraspanin [Source:UniProtKB/TrEMBL;Acc:A0A3Q0KF36]			SM_V10_4
0.508	0.0124883	0.016	0.0180168	0.052	0.036	Muscle 1	Smp_313210	BTB domain-containing protein	Source:UniProtKB/TrEMBL;Acc:A0A5K4F581]	schistosoma_mansoni_prjea36577	BTB domain-containing protein [Source:UniProtKB/TrEMBL;Acc:A0A5K4F581]			SM_V10_4
0.508	0.0170691	0.016	0.0246255	0.13	0.115	Muscle 1	Smp_079000	Vacuolar assembly/sorting protein D1D2-like protein	Source:UniProtKB/TrEMBL;Acc:Q15EU1]	schistosoma_mansoni_prjea36577	Vacuolar assembly/sorting protein D1D2-like protein [Source:UniProtKB/TrEMBL;Acc:Q15EU1]			SM_V10_4
0.508	0.0120885	0.016	0.0174401	0.095	0.078	Muscle 1	Smp_023550	Putative beta-catenin	Source:UniProtKB/TrEMBL;Acc:G4VFS7]	schistosoma_mansoni_prjea36577	Putative beta-catenin [Source:UniProtKB/TrEMBL;Acc:G4VFS7]			SM_V10_3
0.508	0.0170266	0.016	0.0245641	0.117	0.1	Muscle 1	Smp_138520	Zf-Di19 domain-containing protein	Source:UniProtKB/TrEMBL;Acc:A0A3Q0KMX1]	schistosoma_mansoni_prjea36577	Zf-Di19 domain-containing protein [Source:UniProtKB/TrEMBL;Acc:A0A3Q0KMX1]			SM_V10_3
0.508	0.0289442	0.016	0.0417577	0.174	0.162	Muscle 1	Smp_326400	PseudoU_synth_2 domain-containing protein	Source:UniProtKB/TrEMBL;Acc:A0A5K4F6M3]	schistosoma_mansoni_prjea36577	PseudoU_synth_2 domain-containing protein [Source:UniProtKB/TrEMBL;Acc:A0A5K4F6M3]			SM_V10_3
0.508	0.0191542	0.016	0.0276336	0.118	0.103	Muscle 1	Smp_150210	Putative autocrine motility factor receptor,amfr	Source:UniProtKB/TrEMBL;Acc:A0A3Q0KPS2]	schistosoma_mansoni_prjea36577	Putative autocrine motility factor receptor,amfr [Source:UniProtKB/TrEMBL;Acc:A0A3Q0KPS2]			SM_V10_3
0.508	0.0174951	0.016	0.0252401	0.019	0.003	Muscle 1	Smp_170430	Putative d-amino acid oxidase	Source:UniProtKB/TrEMBL;Acc:A0A3Q0KSQ6]	schistosoma_mansoni_prjea36577	Putative d-amino acid oxidase [Source:UniProtKB/TrEMBL;Acc:A0A3Q0KSQ6]			SM_V10_2
0.508	0.0162788	0.016	0.0234853	0.025	0.008	Muscle 1	Smp_181080	Shb-like protein	Source:UniProtKB/TrEMBL;Acc:A0A5K4EYF6]	schistosoma_mansoni_prjea36577	Shb-like protein [Source:UniProtKB/TrEMBL;Acc:A0A5K4EYF6]			SM_V10_2
0.508	0.0231135	0.016	0.0333457	0.095	0.08	Muscle 1	Smp_082660	Transcription intermediary factor 1-related	Source:UniProtKB/TrEMBL;Acc:G4VC92]	schistosoma_mansoni_prjea36577	Transcription intermediary factor 1-related [Source:UniProtKB/TrEMBL;Acc:G4VC92]			SM_V10_2
0.508	0.0368138	0.016	0.0531111	0.353	0.348	Muscle 1	Smp_013790	RNA helicase	Source:UniProtKB/TrEMBL;Acc:A0A3Q0KCI5]	schistosoma_mansoni_prjea36577	RNA helicase [Source:UniProtKB/TrEMBL;Acc:A0A3Q0KCI5]			SM_V10_2
0.508	0.0161025	0.016	0.023231	0.029	0.014	Muscle 1	Smp_310210	SH3 domain-containing protein	Source:UniProtKB/TrEMBL;Acc:A0A5K4F6M0]	schistosoma_mansoni_prjea36577	SH3 domain-containing protein [Source:UniProtKB/TrEMBL;Acc:A0A5K4F6M0]			SM_V10_1
0.508	0.0162968	0.016	0.0235113	0.026	0.009	Muscle 1	Smp_056060	Putative rhodopsin-like orphan GPCR	Source:UniProtKB/TrEMBL;Acc:A0A3Q0KG80]	schistosoma_mansoni_prjea36577	Putative rhodopsin-like orphan GPCR [Source:UniProtKB/TrEMBL;Acc:A0A3Q0KG80]			SM_V10_1
0.508	0.016112	0.016	0.0232447	0.028	0.012	Muscle 1	Smp_081900	Membrane attack complex inhibition factor	Source:UniProtKB/TrEMBL;Acc:G4VAS6]	schistosoma_mansoni_prjea36577	Membrane attack complex inhibition factor [Source:UniProtKB/TrEMBL;Acc:G4VAS6]			SM_V10_1
0.508	0.0266132	0.016	0.0383947	0.252	0.241	Muscle 1	Smp_308360	Smp_308360	Smp_308360~	schistosoma_mansoni_prjea36577				SM_V10_1
0.508	0.0196346	0.016	0.0283268	0.073	0.057	Muscle 1	Smp_048420	Coiled-coil domain-containing protein 115	Source:UniProtKB/TrEMBL;Acc:G4V8J3]	schistosoma_mansoni_prjea36577	Coiled-coil domain-containing protein 115 [Source:UniProtKB/TrEMBL;Acc:G4V8J3]			SM_V10_1
0.508	0.0166745	0.016	0.0240562	0.026	0.01	Muscle 1	Smp_196300	Putative rhogef and pleckstrin domain protein	Source:UniProtKB/TrEMBL;Acc:A0A3Q0KUU9]	schistosoma_mansoni_prjea36577	Putative rhogef and pleckstrin domain protein [Source:UniProtKB/TrEMBL;Acc:A0A3Q0KUU9]			SM_V10_1
0.508	0.014262	0.016	0.0205757	0.021	0.005	Muscle 1	Smp_341660	Sulfhydryl oxidase	Source:UniProtKB/TrEMBL;Acc:A0A5K4FC78]	schistosoma_mansoni_prjea36577	Sulfhydryl oxidase [Source:UniProtKB/TrEMBL;Acc:A0A5K4FC78]			SM_V10_1
0.508	0.0291161	0.016	0.0420057	0.364	0.356	Muscle 1	Smp_098740	Dpy30-related	Source:UniProtKB/TrEMBL;Acc:G4M195]	schistosoma_mansoni_prjea36577	Dpy30-related [Source:UniProtKB/TrEMBL;Acc:G4M195]			SM_V10_1
0.508	0.0135273	0.016	0.0195158	0.042	0.026	Muscle 1	Smp_144550	Chromobox protein-related (Chromobox 1) (Heterochromatin 1)	Source:UniProtKB/TrEMBL;Acc:G4V7S3]	schistosoma_mansoni_prjea36577	Chromobox protein-related (Chromobox 1) (Heterochromatin 1) [Source:UniProtKB/TrEMBL;Acc:G4V7S3]			SM_V10_1
0.508	0.0258555	0.016	0.0373016	0.217	0.205	Muscle 1	Smp_037910	Succinate dehydrogenase	ubiquinone] cytochrome b small subunit	schistosoma_mansoni_prjea36577	Succinate dehydrogenase [ubiquinone] cytochrome b small subunit [Source:UniProtKB/TrEMBL;Acc:G4V6D5]			SM_V10_1
0.508	0.0161591	0.016	0.0233127	0.022	0.007	Muscle 1	Smp_137410	Calpain C (C02 family)	Source:UniProtKB/TrEMBL;Acc:A0A3Q0KMT5]	schistosoma_mansoni_prjea36577	Calpain C (C02 family) [Source:UniProtKB/TrEMBL;Acc:A0A3Q0KMT5]			SM_V10_1
0.508	0.0158753	0.016	0.0229032	0.049	0.032	Muscle 1	Smp_019280	Camp-dependent protein kinase regulatory chain,putative	Source:UniProtKB/TrEMBL;Acc:G4LUC8]	schistosoma_mansoni_prjea36577	Camp-dependent protein kinase regulatory chain,putative [Source:UniProtKB/TrEMBL;Acc:G4LUC8]			SM_V10_1
0.508	0.0129978	0.016	0.0187519	0.066	0.05	Muscle 1	Smp_337200	SH2 domain-containing protein	Source:UniProtKB/TrEMBL;Acc:A0A5K4FC75]	schistosoma_mansoni_prjea36577	SH2 domain-containing protein [Source:UniProtKB/TrEMBL;Acc:A0A5K4FC75]			SM_V10_1
0.508	0.0232018	0.016	0.0334732	0.089	0.074	Muscle 1	Smp_126020	fumarate hydratase	Source:UniProtKB/TrEMBL;Acc:G4VB23]	schistosoma_mansoni_prjea36577	fumarate hydratase [Source:UniProtKB/TrEMBL;Acc:G4VB23]			SM_V10_1
0.508	0.0179124	0.016	0.0258421	0.055	0.039	Muscle 1	Smp_126080	Putative beta-arrestin 1	Source:UniProtKB/TrEMBL;Acc:G4VB17]	schistosoma_mansoni_prjea36577	Putative beta-arrestin 1 [Source:UniProtKB/TrEMBL;Acc:G4VB17]			SM_V10_1
0.508	0.0151503	0.016	0.0218573	0.104	0.088	Muscle 1	Smp_012690	Putative zinc finger protein	Source:UniProtKB/TrEMBL;Acc:G4V9F8]	schistosoma_mansoni_prjea36577	Putative zinc finger protein [Source:UniProtKB/TrEMBL;Acc:G4V9F8]			SM_V10_1
0.508	0.0093253	0.016	0.0134536	0.065	0.049	Muscle 1	Smp_020300	Putative dishevelled	Source:UniProtKB/TrEMBL;Acc:A0A3Q0KD31]	schistosoma_mansoni_prjea36577	Putative dishevelled [Source:UniProtKB/TrEMBL;Acc:A0A3Q0KD31]			SM_V10_1
0.508	0.0225132	0.016	0.0324797	0.092	0.077	Muscle 1	Smp_141080	Putative DNAj (Hsp40) homolog, subfamily B, member	Source:UniProtKB/TrEMBL;Acc:G4V841]	schistosoma_mansoni_prjea36577	Putative DNAj (Hsp40) homolog, subfamily B, member [Source:UniProtKB/TrEMBL;Acc:G4V841]			SM_V10_1
0.508	0.0128193	0.016	0.0184943	0.064	0.048	Muscle 1	Smp_141120	C2H2-type domain-containing protein	Source:UniProtKB/TrEMBL;Acc:A0A3Q0KNB7]	schistosoma_mansoni_prjea36577	C2H2-type domain-containing protein [Source:UniProtKB/TrEMBL;Acc:A0A3Q0KNB7]			SM_V10_1
0.508	0.0168268	0.016	0.0242759	0.048	0.032	Muscle 1	Smp_159750	Vacuolar protein sorting-associated protein 54	Source:UniProtKB/TrEMBL;Acc:A0A3Q0KRG8]	schistosoma_mansoni_prjea36577	Vacuolar protein sorting-associated protein 54 [Source:UniProtKB/TrEMBL;Acc:A0A3Q0KRG8]			SM_V10_1
0.508	0.0163124	0.016	0.0235338	0.033	0.016	Muscle 1	Smp_175270	Delta-like protein	Source:UniProtKB/TrEMBL;Acc:A0A3Q0KTF1]	schistosoma_mansoni_prjea36577	Delta-like protein [Source:UniProtKB/TrEMBL;Acc:A0A3Q0KTF1]			SM_V10_1
0.508	0.0173045	0.016	0.0249651	0.043	0.026	Muscle 1	Smp_336870	F5/8 type C domain-containing protein	Source:UniProtKB/TrEMBL;Acc:A0A5K4F9Q0]	schistosoma_mansoni_prjea36577	F5/8 type C domain-containing protein [Source:UniProtKB/TrEMBL;Acc:A0A5K4F9Q0]			SM_V10_1
0.508	0.0267262	0.016	0.0385577	0.206	0.191	Muscle 1	Smp_003250	COX assembly mitochondrial protein	Source:UniProtKB/TrEMBL;Acc:A0A3Q0KBL8]	schistosoma_mansoni_prjea36577	COX assembly mitochondrial protein [Source:UniProtKB/TrEMBL;Acc:A0A3Q0KBL8]			SM_V10_1
0.508	0.0163487	0.016	0.0235862	0.055	0.038	Muscle 1	Smp_003620	Putative septin	Source:UniProtKB/TrEMBL;Acc:A0A3Q0KBM8]	schistosoma_mansoni_prjea36577	Putative septin [Source:UniProtKB/TrEMBL;Acc:A0A3Q0KBM8]			SM_V10_1
0.508	0.0183201	0.016	0.0264304	0.056	0.041	Muscle 1	Smp_098840	phosphorylase kinase	Source:UniProtKB/TrEMBL;Acc:G4V683]	schistosoma_mansoni_prjea36577	phosphorylase kinase [Source:UniProtKB/TrEMBL;Acc:G4V683]			SM_V10_1
0.508	0.0160018	0.016	0.0230857	0.027	0.011	Muscle 1	Smp_152280	Arrestin_C domain-containing protein	Source:UniProtKB/TrEMBL;Acc:A0A3Q0KQ22]	schistosoma_mansoni_prjea36577	Arrestin_C domain-containing protein [Source:UniProtKB/TrEMBL;Acc:A0A3Q0KQ22]			SM_V10_1
0.508	0.0135024	0.016	0.0194798	0.089	0.073	Muscle 1	Smp_016200	Putative flotillin-1	Source:UniProtKB/TrEMBL;Acc:A0A3Q0KCQ0]	schistosoma_mansoni_prjea36577	Putative flotillin-1 [Source:UniProtKB/TrEMBL;Acc:A0A3Q0KCQ0]			SM_V10_1
0.508	0.0197285	0.016	0.0284623	0.419	0.408	Muscle 1	Smp_099160	SUZ domain-containing protein	Source:UniProtKB/TrEMBL;Acc:G4LUX6]	schistosoma_mansoni_prjea36577	SUZ domain-containing protein [Source:UniProtKB/TrEMBL;Acc:G4LUX6]			SM_V10_1
0.492	0.00380867	0.016	0.00549475	0.323	0.35	Muscle 1	Smp_077070	SUI1 domain-containing protein	Source:UniProtKB/TrEMBL;Acc:A0A3Q0KI18]	schistosoma_mansoni_prjea36577	SUI1 domain-containing protein [Source:UniProtKB/TrEMBL;Acc:A0A3Q0KI18]			SM_V10_Z
0.492	0.00630092	0.016	0.0090903	0.365	0.394	Muscle 1	Smp_153750	MICOS complex subunit	Source:UniProtKB/TrEMBL;Acc:A0A3Q0KQA6]	schistosoma_mansoni_prjea36577	MICOS complex subunit [Source:UniProtKB/TrEMBL;Acc:A0A3Q0KQA6]			SM_V10_Z
0.507	0.0111406	0.014	0.0160725	0.128	0.114	Muscle 1	Smp_166080	Striatin, putative	Source:UniProtKB/TrEMBL;Acc:A0A3Q0KRZ7]	schistosoma_mansoni_prjea36577	Striatin, putative [Source:UniProtKB/TrEMBL;Acc:A0A3Q0KRZ7]			SM_V10_Z
0.507	0.0153799	0.014	0.0221886	0.055	0.042	Muscle 1	Smp_166070	Ral guanine nucleotide exchange factor with pH domain and sh3 binding motif, ralgps, putative	Source:UniProtKB/TrEMBL;Acc:A0A3Q0KS44]	schistosoma_mansoni_prjea36577	Ral guanine nucleotide exchange factor with pH domain and sh3 binding motif, ralgps, putative [Source:UniProtKB/TrEMBL;Acc:A0A3Q0KS44]			SM_V10_Z
0.507	0.0149532	0.014	0.0215728	0.033	0.02	Muscle 1	Smp_136480	Putative ccaat-box DNA binding protein subunit B	Source:UniProtKB/TrEMBL;Acc:A0A3Q0KMM9]	schistosoma_mansoni_prjea36577	Putative ccaat-box DNA binding protein subunit B [Source:UniProtKB/TrEMBL;Acc:A0A3Q0KMM9]			SM_V10_Z
0.507	0.0143931	0.014	0.0207648	0.062	0.047	Muscle 1	Smp_026510	Protein kinase	Source:UniProtKB/TrEMBL;Acc:A0A3Q0KDI9]	schistosoma_mansoni_prjea36577	Protein kinase [Source:UniProtKB/TrEMBL;Acc:A0A3Q0KDI9]			SM_V10_Z
0.507	0.0196491	0.014	0.0283476	0.073	0.059	Muscle 1	Smp_131460	Bestrophin homolog	Source:UniProtKB/TrEMBL;Acc:A0A3Q0KLS6]	schistosoma_mansoni_prjea36577	Bestrophin homolog [Source:UniProtKB/TrEMBL;Acc:A0A3Q0KLS6]			SM_V10_Z
0.507	0.0139131	0.014	0.0200724	0.025	0.011	Muscle 1	Smp_161110	Putative fh1/fh2 domains-containing protein (Formin homolog overexpressed in spleen) (Fhos)	Source:UniProtKB/TrEMBL;Acc:A0A3Q0KRM5]	schistosoma_mansoni_prjea36577	Putative fh1/fh2 domains-containing protein (Formin homolog overexpressed in spleen) (Fhos) [Source:UniProtKB/TrEMBL;Acc:A0A3Q0KRM5]			SM_V10_Z
0.507	0.0147289	0.014	0.0212493	0.031	0.016	Muscle 1	Smp_161140	Putative voltage-gated potassium channel	Source:UniProtKB/TrEMBL;Acc:A0A3Q0KRC9]	schistosoma_mansoni_prjea36577	Putative voltage-gated potassium channel [Source:UniProtKB/TrEMBL;Acc:A0A3Q0KRC9]			SM_V10_Z
0.507	0.0164795	0.014	0.0237749	0.116	0.103	Muscle 1	Smp_084140	NAD-dependent protein deacetylase	Source:UniProtKB/TrEMBL;Acc:A0A5K4EHC2]	schistosoma_mansoni_prjea36577	NAD-dependent protein deacetylase [Source:UniProtKB/TrEMBL;Acc:A0A5K4EHC2]	Sirt2	UniProtKB Gene Name	SM_V10_Z
0.507	0.0229478	0.014	0.0331067	0.772	0.802	Muscle 1	Smp_099030	Protein kinase	Source:UniProtKB/TrEMBL;Acc:G4VR11]	schistosoma_mansoni_prjea36577	Protein kinase [Source:UniProtKB/TrEMBL;Acc:G4VR11]			SM_V10_Z
0.507	0.0177164	0.014	0.0255594	0.269	0.256	Muscle 1	Smp_340290	Nipped-B protein	Source:UniProtKB/TrEMBL;Acc:A0A5K4F9H2]	schistosoma_mansoni_prjea36577	Nipped-B protein [Source:UniProtKB/TrEMBL;Acc:A0A5K4F9H2]			SM_V10_Z
0.507	0.0321698	0.014	0.0464112	0.294	0.287	Muscle 1	Smp_058170	Agenet-like domain-containing protein	Source:UniProtKB/TrEMBL;Acc:A0A3Q0KGB7]	schistosoma_mansoni_prjea36577	Agenet-like domain-containing protein [Source:UniProtKB/TrEMBL;Acc:A0A3Q0KGB7]			SM_V10_Z
0.507	0.0160742	0.014	0.0231901	0.109	0.095	Muscle 1	Smp_094480	Putative guanine nucleotide-binding protein beta 1, 4 (G protein beta1, 4)	Source:UniProtKB/TrEMBL;Acc:G4VTR5]	schistosoma_mansoni_prjea36577	Putative guanine nucleotide-binding protein beta 1, 4 (G protein beta1, 4) [Source:UniProtKB/TrEMBL;Acc:G4VTR5]			SM_V10_Z
0.507	0.014481	0.014	0.0208916	0.055	0.041	Muscle 1	Smp_203600	Smp_203600	Smp_203600~	schistosoma_mansoni_prjea36577				SM_V10_Z
0.507	0.0131921	0.014	0.0190322	0.068	0.055	Muscle 1	Smp_142180	poly(ADP-ribose) glycohydrolase	Source:UniProtKB/TrEMBL;Acc:A0A3Q0KNH9]	schistosoma_mansoni_prjea36577	poly(ADP-ribose) glycohydrolase [Source:UniProtKB/TrEMBL;Acc:A0A3Q0KNH9]			SM_V10_Z
0.507	0.0161652	0.014	0.0233214	0.074	0.06	Muscle 1	Smp_166500	Phosphatidylcholine-sterol acyltransferase (Lecithin-cholesterol acyltransferase)/ Phospholipase A	Source:UniProtKB/TrEMBL;Acc:A0A3Q0KSH1]	schistosoma_mansoni_prjea36577	Phosphatidylcholine-sterol acyltransferase (Lecithin-cholesterol acyltransferase)/ Phospholipase A [Source:UniProtKB/TrEMBL;Acc:A0A3Q0KSH1]			SM_V10_Z
0.507	0.0158506	0.014	0.0228676	0.059	0.045	Muscle 1	Smp_134300	beta-N-acetylhexosaminidase	Source:UniProtKB/TrEMBL;Acc:A0A3Q0KM70]	schistosoma_mansoni_prjea36577	beta-N-acetylhexosaminidase [Source:UniProtKB/TrEMBL;Acc:A0A3Q0KM70]			SM_V10_Z
0.507	0.0132618	0.014	0.0191327	0.032	0.017	Muscle 1	Smp_028670	Putative carbonic anhydrase II (Carbonate dehydratase II)	Source:UniProtKB/TrEMBL;Acc:G4VP62]	schistosoma_mansoni_prjea36577	Putative carbonic anhydrase II (Carbonate dehydratase II) [Source:UniProtKB/TrEMBL;Acc:G4VP62]			SM_V10_Z
0.507	0.0151539	0.014	0.0218624	0.025	0.01	Muscle 1	Smp_322130	Chromatin modification-related protein eaf-1-like	Source:UniProtKB/TrEMBL;Acc:A0A5K4F960]	schistosoma_mansoni_prjea36577	Chromatin modification-related protein eaf-1-like [Source:UniProtKB/TrEMBL;Acc:A0A5K4F960]			SM_V10_Z
0.507	0.0140704	0.014	0.0202993	0.037	0.022	Muscle 1	Smp_021600	Trimeric intracellular cation channel type B	Source:UniProtKB/TrEMBL;Acc:A0A3Q0KD79]	schistosoma_mansoni_prjea36577	Trimeric intracellular cation channel type B [Source:UniProtKB/TrEMBL;Acc:A0A3Q0KD79]			SM_V10_Z
0.507	0.00565457	0.014	0.00815782	0.047	0.034	Muscle 1	Smp_175930	Elav (Embryonic lethal, abnormal vision,drosophila)-like protein	Source:UniProtKB/TrEMBL;Acc:A0A3Q0KTG2]	schistosoma_mansoni_prjea36577	Elav (Embryonic lethal, abnormal vision,drosophila)-like protein [Source:UniProtKB/TrEMBL;Acc:A0A3Q0KTG2]			SM_V10_Z
0.507	0.0125695	0.014	0.018134	0.084	0.07	Muscle 1	Smp_337130	Ras-related protein Rab11D	Source:UniProtKB/TrEMBL;Acc:A0A5K4FB86]	schistosoma_mansoni_prjea36577	Ras-related protein Rab11D [Source:UniProtKB/TrEMBL;Acc:A0A5K4FB86]			SM_V10_7
0.507	0.0143041	0.014	0.0206365	0.089	0.074	Muscle 1	Smp_125290	IPR001194 DENN,domain-containing protein	Source:UniProtKB/TrEMBL;Acc:A0A3Q0KKV4]	schistosoma_mansoni_prjea36577	IPR001194 DENN,domain-containing protein [Source:UniProtKB/TrEMBL;Acc:A0A3Q0KKV4]			SM_V10_7
0.507	0.0136828	0.014	0.0197402	0.067	0.053	Muscle 1	Smp_064240	Putative clathrin coat assembly protein ap-1	Source:UniProtKB/TrEMBL;Acc:A0A3Q0KGX2]	schistosoma_mansoni_prjea36577	Putative clathrin coat assembly protein ap-1 [Source:UniProtKB/TrEMBL;Acc:A0A3Q0KGX2]			SM_V10_6
0.507	0.0138521	0.014	0.0199844	0.064	0.049	Muscle 1	Smp_334680	IRS-type PTB domain-containing protein	Source:UniProtKB/TrEMBL;Acc:A0A5K4F969]	schistosoma_mansoni_prjea36577	IRS-type PTB domain-containing protein [Source:UniProtKB/TrEMBL;Acc:A0A5K4F969]			SM_V10_6
0.507	0.0125865	0.014	0.0181585	0.061	0.046	Muscle 1	Smp_305550	Serpin, putative	Source:UniProtKB/TrEMBL;Acc:A0A5K4F400]	schistosoma_mansoni_prjea36577	Serpin, putative [Source:UniProtKB/TrEMBL;Acc:A0A5K4F400]			SM_V10_6
0.507	0.0166214	0.014	0.0239796	0.137	0.125	Muscle 1	Smp_266870	Transmembrane protein	Source:UniProtKB/TrEMBL;Acc:A0A5K4F1P5]	schistosoma_mansoni_prjea36577	Transmembrane protein [Source:UniProtKB/TrEMBL;Acc:A0A5K4F1P5]			SM_V10_5
0.507	0.0149143	0.014	0.0215168	0.059	0.045	Muscle 1	Smp_133420	Serine/threonine kinase	Source:UniProtKB/TrEMBL;Acc:A0A3Q0KM50]	schistosoma_mansoni_prjea36577	Serine/threonine kinase [Source:UniProtKB/TrEMBL;Acc:A0A3Q0KM50]			SM_V10_5
0.507	0.0141125	0.014	0.02036	0.028	0.015	Muscle 1	Smp_314750	Calponin-homology (CH) domain-containing protein	Source:UniProtKB/TrEMBL;Acc:A0A5K4F440]	schistosoma_mansoni_prjea36577	Calponin-homology (CH) domain-containing protein [Source:UniProtKB/TrEMBL;Acc:A0A5K4F440]			SM_V10_5
0.507	0.014739	0.014	0.0212639	0.056	0.043	Muscle 1	Smp_330710	Smp_330710	Smp_330710~	schistosoma_mansoni_prjea36577				SM_V10_5
0.507	0.0106243	0.014	0.0153276	0.064	0.049	Muscle 1	Smp_198020	Putative o-methyltransferase	Source:UniProtKB/TrEMBL;Acc:G4VHP5]	schistosoma_mansoni_prjea36577	Putative o-methyltransferase [Source:UniProtKB/TrEMBL;Acc:G4VHP5]			SM_V10_4
0.507	0.0189636	0.014	0.0273587	0.048	0.033	Muscle 1	Smp_145090	Serine incorporator 5	Source:UniProtKB/TrEMBL;Acc:G4M0S3]	schistosoma_mansoni_prjea36577	Serine incorporator 5 [Source:UniProtKB/TrEMBL;Acc:G4M0S3]			SM_V10_4
0.507	0.020729	0.014	0.0299056	0.304	0.294	Muscle 1	Smp_167890	Peptide-methionine (R)-S-oxide reductase	Source:UniProtKB/TrEMBL;Acc:A0A3Q0KSP6]	schistosoma_mansoni_prjea36577	Peptide-methionine (R)-S-oxide reductase [Source:UniProtKB/TrEMBL;Acc:A0A3Q0KSP6]	msrB	UniProtKB Gene Name	SM_V10_4
0.507	0.0163162	0.014	0.0235394	0.022	0.007	Muscle 1	Smp_343810	G_PROTEIN_RECEP_F1_2 domain-containing protein	Source:UniProtKB/TrEMBL;Acc:A0A5K4FCZ2]	schistosoma_mansoni_prjea36577	G_PROTEIN_RECEP_F1_2 domain-containing protein [Source:UniProtKB/TrEMBL;Acc:A0A5K4FCZ2]			SM_V10_4
0.507	0.0153003	0.014	0.0220736	0.023	0.008	Muscle 1	Smp_135490	Multidrug and toxin extrusion protein	Source:UniProtKB/TrEMBL;Acc:A0A3Q0KMD5]	schistosoma_mansoni_prjea36577	Multidrug and toxin extrusion protein [Source:UniProtKB/TrEMBL;Acc:A0A3Q0KMD5]			SM_V10_4
0.507	0.0140483	0.014	0.0202674	0.015	0.002	Muscle 1	Smp_345090	Alpha-carbonic anhydrase domain-containing protein	Source:UniProtKB/TrEMBL;Acc:A0A5K4FEK7]	schistosoma_mansoni_prjea36577	Alpha-carbonic anhydrase domain-containing protein [Source:UniProtKB/TrEMBL;Acc:A0A5K4FEK7]			SM_V10_4
0.507	0.0137951	0.014	0.0199021	0.05	0.037	Muscle 1	Smp_126800	Putative mkiaa1688 protein	Source:UniProtKB/TrEMBL;Acc:A0A3Q0KL41]	schistosoma_mansoni_prjea36577	Putative mkiaa1688 protein [Source:UniProtKB/TrEMBL;Acc:A0A3Q0KL41]			SM_V10_4
0.507	0.0105642	0.014	0.0152409	0.105	0.091	Muscle 1	Smp_052140	G-patch_2 domain-containing protein	Source:UniProtKB/TrEMBL;Acc:A0A3Q0KFW2]	schistosoma_mansoni_prjea36577	G-patch_2 domain-containing protein [Source:UniProtKB/TrEMBL;Acc:A0A3Q0KFW2]			SM_V10_4
0.507	0.0160645	0.014	0.0231761	0.041	0.028	Muscle 1	Smp_158860	RNA-binding protein 48	Source:UniProtKB/TrEMBL;Acc:A0A3Q0KR18]	schistosoma_mansoni_prjea36577	RNA-binding protein 48 [Source:UniProtKB/TrEMBL;Acc:A0A3Q0KR18]			SM_V10_4
0.507	0.0151741	0.014	0.0218916	0.062	0.047	Muscle 1	Smp_345540	RING-type E3 ubiquitin transferase	Source:UniProtKB/TrEMBL;Acc:A0A5K4FBE5]	schistosoma_mansoni_prjea36577	RING-type E3 ubiquitin transferase [Source:UniProtKB/TrEMBL;Acc:A0A5K4FBE5]			SM_V10_4
0.507	0.0153994	0.014	0.0222166	0.018	0.004	Muscle 1	Smp_176100	Cation efflux protein/ zinc transporter,putative	Source:UniProtKB/TrEMBL;Acc:A0A5K4EWQ4]	schistosoma_mansoni_prjea36577	Cation efflux protein/ zinc transporter,putative [Source:UniProtKB/TrEMBL;Acc:A0A5K4EWQ4]			SM_V10_4
0.507	0.0388548	0.014	0.0560556	0.393	0.395	Muscle 1	Smp_092490	Putative nadh-plastoquinone oxidoreductase	Source:UniProtKB/TrEMBL;Acc:G4V5Q1]	schistosoma_mansoni_prjea36577	Putative nadh-plastoquinone oxidoreductase [Source:UniProtKB/TrEMBL;Acc:G4V5Q1]			SM_V10_3
0.507	0.0112553	0.014	0.016238	0.064	0.049	Muscle 1	Smp_246290	SAC domain-containing protein	Source:UniProtKB/TrEMBL;Acc:A0A5K4F132]	schistosoma_mansoni_prjea36577	SAC domain-containing protein [Source:UniProtKB/TrEMBL;Acc:A0A5K4F132]			SM_V10_3
0.507	0.0153093	0.014	0.0220867	0.036	0.022	Muscle 1	Smp_000510	mannose-1-phosphate guanylyltransferase	Source:UniProtKB/TrEMBL;Acc:A0A3Q0KBC3]	schistosoma_mansoni_prjea36577	mannose-1-phosphate guanylyltransferase [Source:UniProtKB/TrEMBL;Acc:A0A3Q0KBC3]			SM_V10_3
0.507	0.0158908	0.014	0.0229255	0.017	0.004	Muscle 1	Smp_164590	Putative collagen alpha-1(V) chain	Source:UniProtKB/TrEMBL;Acc:A0A3Q0KS63]	schistosoma_mansoni_prjea36577	Putative collagen alpha-1(V) chain [Source:UniProtKB/TrEMBL;Acc:A0A3Q0KS63]			SM_V10_3
0.507	0.0177877	0.014	0.0256622	0.014	0	Muscle 1	Smp_326300	Smp_326300	Smp_326300~	schistosoma_mansoni_prjea36577				SM_V10_3
0.507	0.0156023	0.014	0.0225094	0.058	0.044	Muscle 1	Smp_124490	Retinoblastoma-binding protein-related	Source:UniProtKB/TrEMBL;Acc:G4LXI5]	schistosoma_mansoni_prjea36577	Retinoblastoma-binding protein-related [Source:UniProtKB/TrEMBL;Acc:G4LXI5]			SM_V10_3
0.507	0.0141857	0.014	0.0204656	0.014	0	Muscle 1	Smp_325570	Smp_325570	Smp_325570~	schistosoma_mansoni_prjea36577				SM_V10_3
0.507	0.0173573	0.014	0.0250413	0.791	0.806	Muscle 1	Smp_030730	Tubulin beta chain	Source:UniProtKB/TrEMBL;Acc:A0A3Q0KDZ1]	schistosoma_mansoni_prjea36577	Tubulin beta chain [Source:UniProtKB/TrEMBL;Acc:A0A3Q0KDZ1]			SM_V10_3
0.507	0.0185397	0.014	0.0267471	0.122	0.108	Muscle 1	Smp_133940	WW domain-containing protein	Source:UniProtKB/TrEMBL;Acc:A0A3Q0KM73]	schistosoma_mansoni_prjea36577	WW domain-containing protein [Source:UniProtKB/TrEMBL;Acc:A0A3Q0KM73]			SM_V10_2
0.507	0.0149054	0.014	0.021504	0.017	0.002	Muscle 1	Smp_245980	C2H2-type domain-containing protein	Source:UniProtKB/TrEMBL;Acc:A0A5K4F0Z5]	schistosoma_mansoni_prjea36577	C2H2-type domain-containing protein [Source:UniProtKB/TrEMBL;Acc:A0A5K4F0Z5]			SM_V10_2
0.507	0.0324108	0.014	0.0467588	0.197	0.188	Muscle 1	Smp_128770	Ubiquitin carboxyl-terminal hydrolase	Source:UniProtKB/TrEMBL;Acc:A0A3Q0KLB4]	schistosoma_mansoni_prjea36577	Ubiquitin carboxyl-terminal hydrolase [Source:UniProtKB/TrEMBL;Acc:A0A3Q0KLB4]			SM_V10_2
0.507	0.0169702	0.014	0.0244829	0.055	0.04	Muscle 1	Smp_009520	Probable glutamate--tRNA ligase, mitochondrial	Source:UniProtKB/TrEMBL;Acc:G4V9R9]	schistosoma_mansoni_prjea36577	Probable glutamate--tRNA ligase, mitochondrial [Source:UniProtKB/TrEMBL;Acc:G4V9R9]			SM_V10_2
0.507	0.0123691	0.014	0.0178448	0.019	0.005	Muscle 1	Smp_123030	Putative centaurin alpha	Source:UniProtKB/TrEMBL;Acc:A0A3Q0KKI3]	schistosoma_mansoni_prjea36577	Putative centaurin alpha [Source:UniProtKB/TrEMBL;Acc:A0A3Q0KKI3]			SM_V10_2
0.507	0.012765	0.014	0.018416	0.021	0.008	Muscle 1	Smp_013950	Selectively expressed in embryonic epithelia protein-1, putative	Source:UniProtKB/TrEMBL;Acc:A0A3Q0KCJ5]	schistosoma_mansoni_prjea36577	Selectively expressed in embryonic epithelia protein-1, putative [Source:UniProtKB/TrEMBL;Acc:A0A3Q0KCJ5]			SM_V10_2
0.507	0.0148523	0.014	0.0214273	0.019	0.005	Muscle 1	Smp_167750	Putative fatty-acid amide hydrolase	Source:UniProtKB/TrEMBL;Acc:A0A3Q0KS85]	schistosoma_mansoni_prjea36577	Putative fatty-acid amide hydrolase [Source:UniProtKB/TrEMBL;Acc:A0A3Q0KS85]			SM_V10_2
0.507	0.015276	0.014	0.0220386	0.015	0	Muscle 1	Smp_245610	Smp_245610	Smp_245610~	schistosoma_mansoni_prjea36577				SM_V10_2
0.507	0.0102034	0.014	0.0147204	0.082	0.067	Muscle 1	Smp_340340	CBM21 domain-containing protein	Source:UniProtKB/TrEMBL;Acc:A0A5K4FBQ7]	schistosoma_mansoni_prjea36577	CBM21 domain-containing protein [Source:UniProtKB/TrEMBL;Acc:A0A5K4FBQ7]			SM_V10_2
0.507	0.00577292	0.014	0.00832856	0.068	0.053	Muscle 1	Smp_212760	Kinesin motor domain-containing protein	Source:UniProtKB/TrEMBL;Acc:A0A3Q0KVH4]	schistosoma_mansoni_prjea36577	Kinesin motor domain-containing protein [Source:UniProtKB/TrEMBL;Acc:A0A3Q0KVH4]			SM_V10_2
0.507	0.015178	0.014	0.0218972	0.1	0.086	Muscle 1	Smp_131700	protein kinase C	Source:UniProtKB/TrEMBL;Acc:A0A3Q0KLX8]	schistosoma_mansoni_prjea36577	protein kinase C [Source:UniProtKB/TrEMBL;Acc:A0A3Q0KLX8]			SM_V10_2
0.507	0.0161245	0.014	0.0232627	0.11	0.095	Muscle 1	Smp_327500	Ubiquinone biosynthesis protein COQ4 homolog, mitochondrial	Source:UniProtKB/TrEMBL;Acc:A0A5K4FAH3]	schistosoma_mansoni_prjea36577	Ubiquinone biosynthesis protein COQ4 homolog, mitochondrial [Source:UniProtKB/TrEMBL;Acc:A0A5K4FAH3]			SM_V10_2
0.507	0.021101	0.014	0.0304424	0.157	0.144	Muscle 1	Smp_104670	Rab15, 13, 10, 1, 35, 5, and, putative	Source:UniProtKB/TrEMBL;Acc:G4LXZ3]	schistosoma_mansoni_prjea36577	Rab15, 13, 10, 1, 35, 5, and, putative [Source:UniProtKB/TrEMBL;Acc:G4LXZ3]			SM_V10_1
0.507	0.0129648	0.014	0.0187043	0.047	0.033	Muscle 1	Smp_152000	Ubiquitin carboxyl-terminal hydrolase	Source:UniProtKB/TrEMBL;Acc:A0A3Q0KQ07]	schistosoma_mansoni_prjea36577	Ubiquitin carboxyl-terminal hydrolase [Source:UniProtKB/TrEMBL;Acc:A0A3Q0KQ07]			SM_V10_1
0.507	0.0136847	0.014	0.0197429	0.24	0.228	Muscle 1	Smp_065470	Putative tumor protein d52	Source:UniProtKB/TrEMBL;Acc:A0A3Q0KH09]	schistosoma_mansoni_prjea36577	Putative tumor protein d52 [Source:UniProtKB/TrEMBL;Acc:A0A3Q0KH09]			SM_V10_1
0.507	0.0126219	0.014	0.0182096	0.076	0.063	Muscle 1	Smp_067250	Putative fms interacting protein	Source:UniProtKB/TrEMBL;Acc:G4V9P7]	schistosoma_mansoni_prjea36577	Putative fms interacting protein [Source:UniProtKB/TrEMBL;Acc:G4V9P7]			SM_V10_1
0.507	0.00857697	0.014	0.012374	0.057	0.043	Muscle 1	Smp_332600	MAM domain-containing protein	Source:UniProtKB/TrEMBL;Acc:A0A5K4FBY0]	schistosoma_mansoni_prjea36577	MAM domain-containing protein [Source:UniProtKB/TrEMBL;Acc:A0A5K4FBY0]			SM_V10_1
0.507	0.029539	0.014	0.0426157	0.542	0.548	Muscle 1	Smp_006850	DNA-directed RNA polymerases I, II, and III subunit RPABC3	Source:UniProtKB/TrEMBL;Acc:G4V892]	schistosoma_mansoni_prjea36577	DNA-directed RNA polymerases I, II, and III subunit RPABC3 [Source:UniProtKB/TrEMBL;Acc:G4V892]			SM_V10_1
0.507	0.0134974	0.014	0.0194726	0.041	0.026	Muscle 1	Smp_142600	Putative capicua protein	Source:UniProtKB/TrEMBL;Acc:A0A3Q0KNM3]	schistosoma_mansoni_prjea36577	Putative capicua protein [Source:UniProtKB/TrEMBL;Acc:A0A3Q0KNM3]			SM_V10_1
0.507	0.0144493	0.014	0.0208459	0.053	0.038	Muscle 1	Smp_037900	Family S12 unassigned peptidase (S12 family)	Source:UniProtKB/TrEMBL;Acc:A0A3Q0KEL6]	schistosoma_mansoni_prjea36577	Family S12 unassigned peptidase (S12 family) [Source:UniProtKB/TrEMBL;Acc:A0A3Q0KEL6]			SM_V10_1
0.507	0.0155479	0.014	0.0224309	0.073	0.058	Muscle 1	Smp_180150	DNA-directed RNA polymerase, putative	Source:UniProtKB/TrEMBL;Acc:A0A3Q0KTR3]	schistosoma_mansoni_prjea36577	DNA-directed RNA polymerase, putative [Source:UniProtKB/TrEMBL;Acc:A0A3Q0KTR3]			SM_V10_1
0.507	0.0156911	0.014	0.0226374	0.06	0.045	Muscle 1	Smp_152750	protein-tyrosine-phosphatase	Source:UniProtKB/TrEMBL;Acc:A0A5K4ESA0]	schistosoma_mansoni_prjea36577	protein-tyrosine-phosphatase [Source:UniProtKB/TrEMBL;Acc:A0A5K4ESA0]			SM_V10_1
0.507	0.014923	0.014	0.0215293	0.038	0.025	Muscle 1	Smp_025740	Putative rho GTPase	Source:UniProtKB/TrEMBL;Acc:G4VAQ9]	schistosoma_mansoni_prjea36577	Putative rho GTPase [Source:UniProtKB/TrEMBL;Acc:G4VAQ9]			SM_V10_1
0.507	0.0150966	0.014	0.0217798	0.022	0.007	Muscle 1	Smp_305430	Smp_305430	Smp_305430~	schistosoma_mansoni_prjea36577				SM_V10_1
0.507	0.0180287	0.014	0.02601	0.144	0.131	Muscle 1	Smp_140420	5'-3' exoribonuclease, putative	Source:UniProtKB/TrEMBL;Acc:A0A3Q0KN92]	schistosoma_mansoni_prjea36577	5'-3' exoribonuclease, putative [Source:UniProtKB/TrEMBL;Acc:A0A3Q0KN92]			SM_V10_1
0.507	0.0167729	0.014	0.0241982	0.048	0.034	Muscle 1	Smp_033870	MSP domain-containing protein	Source:UniProtKB/TrEMBL;Acc:G4LVE3]	schistosoma_mansoni_prjea36577	MSP domain-containing protein [Source:UniProtKB/TrEMBL;Acc:G4LVE3]			SM_V10_1
0.507	0.0112498	0.014	0.01623	0.056	0.042	Muscle 1	Smp_140490	Putative membrane traffic protein	Source:UniProtKB/TrEMBL;Acc:G4V9S3]	schistosoma_mansoni_prjea36577	Putative membrane traffic protein [Source:UniProtKB/TrEMBL;Acc:G4V9S3]			SM_V10_1
0.507	0.01302	0.014	0.0187839	0.046	0.032	Muscle 1	Smp_034090	BTB domain-containing protein	Source:UniProtKB/TrEMBL;Acc:G4V9U4]	schistosoma_mansoni_prjea36577	BTB domain-containing protein [Source:UniProtKB/TrEMBL;Acc:G4V9U4]			SM_V10_1
0.507	0.0189504	0.014	0.0273397	0.051	0.036	Muscle 1	Smp_125780	Phosphatidylserine synthase	Source:UniProtKB/TrEMBL;Acc:G4V9W8]	schistosoma_mansoni_prjea36577	Phosphatidylserine synthase [Source:UniProtKB/TrEMBL;Acc:G4V9W8]			SM_V10_1
0.507	0.0119646	0.014	0.0172613	0.057	0.044	Muscle 1	Smp_068170	Protein-serine/threonine kinase	Source:UniProtKB/TrEMBL;Acc:A0A3Q0KH84]	schistosoma_mansoni_prjea36577	Protein-serine/threonine kinase [Source:UniProtKB/TrEMBL;Acc:A0A3Q0KH84]			SM_V10_1
0.507	0.0144689	0.014	0.0208742	0.071	0.058	Muscle 1	Smp_073210	Putative adp-ribosylation factor interacting protein	Source:UniProtKB/TrEMBL;Acc:G4VA81]	schistosoma_mansoni_prjea36577	Putative adp-ribosylation factor interacting protein [Source:UniProtKB/TrEMBL;Acc:G4VA81]			SM_V10_1
0.507	0.0206361	0.014	0.0297717	0.08	0.066	Muscle 1	Smp_071550	Vps16_C domain-containing protein	Source:UniProtKB/TrEMBL;Acc:A0A3Q0KHD9]	schistosoma_mansoni_prjea36577	Vps16_C domain-containing protein [Source:UniProtKB/TrEMBL;Acc:A0A3Q0KHD9]			SM_V10_1
0.507	0.0190836	0.014	0.0275318	0.063	0.05	Muscle 1	Smp_141040	Putative striatin	Source:UniProtKB/TrEMBL;Acc:A0A5K4EQ29]	schistosoma_mansoni_prjea36577	Putative striatin [Source:UniProtKB/TrEMBL;Acc:A0A5K4EQ29]			SM_V10_1
0.507	0.00986847	0.014	0.0142372	0.051	0.037	Muscle 1	Smp_141320	Putative jnk/sapk-associated protein	Source:UniProtKB/TrEMBL;Acc:A0A3Q0KNJ7]	schistosoma_mansoni_prjea36577	Putative jnk/sapk-associated protein [Source:UniProtKB/TrEMBL;Acc:A0A3Q0KNJ7]			SM_V10_1
0.493	0.00252246	0.014	0.00363914	0.509	0.539	Muscle 1	Smp_078520	RRM domain-containing protein	Source:UniProtKB/TrEMBL;Acc:A0A3Q0KI50]	schistosoma_mansoni_prjea36577	RRM domain-containing protein [Source:UniProtKB/TrEMBL;Acc:A0A3Q0KI50]			SM_V10_Z
0.493	0.00143804	0.014	0.00207465	0.268	0.288	Muscle 1	Smp_087810	Nucleolar GTP-binding protein 2	Source:UniProtKB/TrEMBL;Acc:A0A3Q0KIU0]	schistosoma_mansoni_prjea36577	Nucleolar GTP-binding protein 2 [Source:UniProtKB/TrEMBL;Acc:A0A3Q0KIU0]			SM_V10_6
0.493	0.00533421	0.014	0.00769563	0.322	0.346	Muscle 1	Smp_133470	Ribonucleoprotein-related	Source:UniProtKB/TrEMBL;Acc:A0A3Q0KM72]	schistosoma_mansoni_prjea36577	Ribonucleoprotein-related [Source:UniProtKB/TrEMBL;Acc:A0A3Q0KM72]			SM_V10_5
0.493	0.00151379	0.014	0.00218394	0.296	0.317	Muscle 1	Smp_053610	serine--tRNA ligase	Source:UniProtKB/TrEMBL;Acc:G4VIZ9]	schistosoma_mansoni_prjea36577	serine--tRNA ligase [Source:UniProtKB/TrEMBL;Acc:G4VIZ9]			SM_V10_4
0.506	0.0190867	0.012	0.0275363	0.159	0.147	Muscle 1	Smp_081510	protein-tyrosine-phosphatase	Source:UniProtKB/TrEMBL;Acc:A0A5K4EH92]	schistosoma_mansoni_prjea36577	protein-tyrosine-phosphatase [Source:UniProtKB/TrEMBL;Acc:A0A5K4EH92]			SM_V10_Z
0.506	0.00679144	0.012	0.00979798	0.091	0.078	Muscle 1	Smp_038140	Putative golgin IMH1	Source:UniProtKB/TrEMBL;Acc:A0A3Q0KEK6]	schistosoma_mansoni_prjea36577	Putative golgin IMH1 [Source:UniProtKB/TrEMBL;Acc:A0A3Q0KEK6]			SM_V10_Z
0.506	0.0169371	0.012	0.0244351	0.161	0.15	Muscle 1	Smp_130410	Dynein light intermediate chain	Source:UniProtKB/TrEMBL;Acc:A0A3Q0KLQ5]	schistosoma_mansoni_prjea36577	Dynein light intermediate chain [Source:UniProtKB/TrEMBL;Acc:A0A3Q0KLQ5]			SM_V10_Z
0.506	0.0126144	0.012	0.0181987	0.022	0.01	Muscle 1	Smp_267130	Leucine-rich repeat-containing protein 23	Source:UniProtKB/TrEMBL;Acc:A0A5K4F389]	schistosoma_mansoni_prjea36577	Leucine-rich repeat-containing protein 23 [Source:UniProtKB/TrEMBL;Acc:A0A5K4F389]			SM_V10_Z
0.506	0.0135465	0.012	0.0195435	0.014	0.002	Muscle 1	Smp_335120	Molybdopterin synthase sulfur carrier subunit	Source:UniProtKB/TrEMBL;Acc:G4LX65]	schistosoma_mansoni_prjea36577	Molybdopterin synthase sulfur carrier subunit [Source:UniProtKB/TrEMBL;Acc:G4LX65]			SM_V10_Z
0.506	0.0133505	0.012	0.0192606	0.038	0.025	Muscle 1	Smp_147460	Neutral ceramidase	Source:UniProtKB/TrEMBL;Acc:A0A5K4ERM4]	schistosoma_mansoni_prjea36577	Neutral ceramidase [Source:UniProtKB/TrEMBL;Acc:A0A5K4ERM4]			SM_V10_Z
0.506	0.0121629	0.012	0.0175473	0.04	0.028	Muscle 1	Smp_159120	Family C48 unassigned peptidase (C48 family)	Source:UniProtKB/TrEMBL;Acc:A0A3Q0KR53]	schistosoma_mansoni_prjea36577	Family C48 unassigned peptidase (C48 family) [Source:UniProtKB/TrEMBL;Acc:A0A3Q0KR53]			SM_V10_Z
0.506	0.0145952	0.012	0.0210565	0.101	0.089	Muscle 1	Smp_012030	Putative zinc finger protein	Source:UniProtKB/TrEMBL;Acc:G4VS02]	schistosoma_mansoni_prjea36577	Putative zinc finger protein [Source:UniProtKB/TrEMBL;Acc:G4VS02]			SM_V10_Z
0.506	0.0194624	0.012	0.0280784	0.183	0.172	Muscle 1	Smp_304900	Ovule protein	Source:UniProtKB/TrEMBL;Acc:A0A5K4F3Q9]	schistosoma_mansoni_prjea36577	Ovule protein [Source:UniProtKB/TrEMBL;Acc:A0A5K4F3Q9]			SM_V10_Z
0.506	0.0184154	0.012	0.0265678	0.111	0.099	Muscle 1	Smp_342740	Conserved oligomeric Golgi complex subunit 1	Source:UniProtKB/TrEMBL;Acc:A0A5K4FAC1]	schistosoma_mansoni_prjea36577	Conserved oligomeric Golgi complex subunit 1 [Source:UniProtKB/TrEMBL;Acc:A0A5K4FAC1]			SM_V10_Z
0.506	0.00718216	0.012	0.0103617	0.18	0.167	Muscle 1	Smp_244950	Dehydrogenase/reductase SDR family member 1	Source:UniProtKB/TrEMBL;Acc:A0A5K4F1L1]	schistosoma_mansoni_prjea36577	Dehydrogenase/reductase SDR family member 1 [Source:UniProtKB/TrEMBL;Acc:A0A5K4F1L1]			SM_V10_Z
0.506	0.005048	0.012	0.00728272	0.071	0.057	Muscle 1	Smp_168050	Long-chain-fatty-acid--CoA ligase	Source:UniProtKB/TrEMBL;Acc:A0A3Q0KSD2]	schistosoma_mansoni_prjea36577	Long-chain-fatty-acid--CoA ligase [Source:UniProtKB/TrEMBL;Acc:A0A3Q0KSD2]			SM_V10_Z
0.506	0.0246275	0.012	0.03553	0.176	0.166	Muscle 1	Smp_242400	Protein MMS22-like	Source:UniProtKB/TrEMBL;Acc:A0A5K4F044]	schistosoma_mansoni_prjea36577	Protein MMS22-like [Source:UniProtKB/TrEMBL;Acc:A0A5K4F044]			SM_V10_Z
0.506	0.0158984	0.012	0.0229365	0.102	0.09	Muscle 1	Smp_134370	RNA 3'-terminal-phosphate cyclase (ATP)	Source:UniProtKB/TrEMBL;Acc:A0A3Q0KMB7]	schistosoma_mansoni_prjea36577	RNA 3'-terminal-phosphate cyclase (ATP) [Source:UniProtKB/TrEMBL;Acc:A0A3Q0KMB7]			SM_V10_Z
0.506	0.0121187	0.012	0.0174836	0.078	0.066	Muscle 1	Smp_022540	Phosphatidylinositol-4,5-bisphosphate 4-phosphatase	Source:UniProtKB/TrEMBL;Acc:A0A3Q0KD87]	schistosoma_mansoni_prjea36577	Phosphatidylinositol-4,5-bisphosphate 4-phosphatase [Source:UniProtKB/TrEMBL;Acc:A0A3Q0KD87]			SM_V10_Z
0.506	0.013143	0.012	0.0189613	0.064	0.053	Muscle 1	Smp_038340	Palmitoyltransferase	Source:UniProtKB/TrEMBL;Acc:G4VNU4]	schistosoma_mansoni_prjea36577	Palmitoyltransferase [Source:UniProtKB/TrEMBL;Acc:G4VNU4]			SM_V10_Z
0.506	0.0130134	0.012	0.0187744	0.041	0.029	Muscle 1	Smp_175780	Sex-determining protein fem-1, putative	Source:UniProtKB/TrEMBL;Acc:A0A5K4EWL6]	schistosoma_mansoni_prjea36577	Sex-determining protein fem-1, putative [Source:UniProtKB/TrEMBL;Acc:A0A5K4EWL6]			SM_V10_7
0.506	0.0118583	0.012	0.0171078	0.093	0.081	Muscle 1	Smp_125270	dual-specificity kinase	Source:UniProtKB/TrEMBL;Acc:A0A3Q0KKV7]	schistosoma_mansoni_prjea36577	dual-specificity kinase [Source:UniProtKB/TrEMBL;Acc:A0A3Q0KKV7]			SM_V10_7
0.506	0.0131484	0.012	0.0189691	0.046	0.034	Muscle 1	Smp_125300	Guanylate cyclase	Source:UniProtKB/TrEMBL;Acc:A0A3Q0KKW9]	schistosoma_mansoni_prjea36577	Guanylate cyclase [Source:UniProtKB/TrEMBL;Acc:A0A3Q0KKW9]			SM_V10_7
0.506	0.0126059	0.012	0.0181865	0.028	0.015	Muscle 1	Smp_057360	Serine/threonine kinase	Source:UniProtKB/TrEMBL;Acc:A0A3Q0KGB6]	schistosoma_mansoni_prjea36577	Serine/threonine kinase [Source:UniProtKB/TrEMBL;Acc:A0A3Q0KGB6]			SM_V10_7
0.506	0.0133007	0.012	0.0191889	0.069	0.057	Muscle 1	Smp_127940	Anion exchange protein	Source:UniProtKB/TrEMBL;Acc:G4VMR3]	schistosoma_mansoni_prjea36577	Anion exchange protein [Source:UniProtKB/TrEMBL;Acc:G4VMR3]			SM_V10_7
0.506	0.0118259	0.012	0.0170612	0.012	0.001	Muscle 1	Smp_131290	RING-type domain-containing protein	Source:UniProtKB/TrEMBL;Acc:A0A3Q0KLR6]	schistosoma_mansoni_prjea36577	RING-type domain-containing protein [Source:UniProtKB/TrEMBL;Acc:A0A3Q0KLR6]			SM_V10_6
0.506	0.0148923	0.012	0.0214851	0.069	0.057	Muscle 1	Smp_123280	Transport proetin (Smap-4-related)	Source:UniProtKB/TrEMBL;Acc:A0A3Q0KKK1]	schistosoma_mansoni_prjea36577	Transport proetin (Smap-4-related) [Source:UniProtKB/TrEMBL;Acc:A0A3Q0KKK1]			SM_V10_6
0.506	0.0102888	0.012	0.0148436	0.064	0.052	Muscle 1	Smp_020760	Ankyrin repeat-containing, putative	Source:UniProtKB/TrEMBL;Acc:G4LYA6]	schistosoma_mansoni_prjea36577	Ankyrin repeat-containing, putative [Source:UniProtKB/TrEMBL;Acc:G4LYA6]			SM_V10_5
0.506	0.0142166	0.012	0.0205102	0.156	0.144	Muscle 1	Smp_039080	Protein FRA10AC1 homolog	Source:UniProtKB/TrEMBL;Acc:G4LWS6]	schistosoma_mansoni_prjea36577	Protein FRA10AC1 homolog [Source:UniProtKB/TrEMBL;Acc:G4LWS6]			SM_V10_5
0.506	0.00542707	0.012	0.00782961	0.085	0.072	Muscle 1	Smp_347940	Calponin-homology (CH) domain-containing protein	Source:UniProtKB/TrEMBL;Acc:A0A5K4FH83]	schistosoma_mansoni_prjea36577	Calponin-homology (CH) domain-containing protein [Source:UniProtKB/TrEMBL;Acc:A0A5K4FH83]			SM_V10_5
0.506	0.00858081	0.012	0.0123795	0.06	0.047	Muscle 1	Smp_247320	DUF4806 domain-containing protein	Source:UniProtKB/TrEMBL;Acc:A0A5K4F2F4]	schistosoma_mansoni_prjea36577	DUF4806 domain-containing protein [Source:UniProtKB/TrEMBL;Acc:A0A5K4F2F4]			SM_V10_4
0.506	0.0264547	0.012	0.0381661	0.33	0.327	Muscle 1	Smp_062630	Putative dynactin subunit	Source:UniProtKB/TrEMBL;Acc:A0A3Q0KGS9]	schistosoma_mansoni_prjea36577	Putative dynactin subunit [Source:UniProtKB/TrEMBL;Acc:A0A3Q0KGS9]			SM_V10_4
0.506	0.00982193	0.012	0.0141701	0.053	0.041	Muscle 1	Smp_342970	Protocadherin Fat 1	Source:UniProtKB/TrEMBL;Acc:A0A5K4FDK9]	schistosoma_mansoni_prjea36577	Protocadherin Fat 1 [Source:UniProtKB/TrEMBL;Acc:A0A5K4FDK9]			SM_V10_4
0.506	0.00209473	0.012	0.00302206	0.122	0.108	Muscle 1	Smp_064030	DUF3825 domain-containing protein	Source:UniProtKB/TrEMBL;Acc:G4VIN2]	schistosoma_mansoni_prjea36577	DUF3825 domain-containing protein [Source:UniProtKB/TrEMBL;Acc:G4VIN2]			SM_V10_4
0.506	0.0119435	0.012	0.0172308	0.023	0.011	Muscle 1	Smp_067010	RUN domain-containing protein	Source:UniProtKB/TrEMBL;Acc:G4VIK1]	schistosoma_mansoni_prjea36577	RUN domain-containing protein [Source:UniProtKB/TrEMBL;Acc:G4VIK1]			SM_V10_4
0.506	0.0120611	0.012	0.0174005	0.097	0.086	Muscle 1	Smp_027910	Synembryn, putative	Source:UniProtKB/TrEMBL;Acc:C4Q4S4]	schistosoma_mansoni_prjea36577	Synembryn, putative [Source:UniProtKB/TrEMBL;Acc:C4Q4S4]			SM_V10_3
0.506	0.00835804	0.012	0.0120581	0.04	0.029	Muscle 1	Smp_150230	Putative cation efflux protein/ zinc transporter	Source:UniProtKB/TrEMBL;Acc:A0A5K4ERI6]	schistosoma_mansoni_prjea36577	Putative cation efflux protein/ zinc transporter [Source:UniProtKB/TrEMBL;Acc:A0A5K4ERI6]			SM_V10_3
0.506	0.0107993	0.012	0.0155802	0.056	0.044	Muscle 1	Smp_246450	CDK5RAP3-like protein	Source:UniProtKB/TrEMBL;Acc:A0A5K4F2G9]	schistosoma_mansoni_prjea36577	CDK5RAP3-like protein [Source:UniProtKB/TrEMBL;Acc:A0A5K4F2G9]			SM_V10_3
0.506	0.0117626	0.012	0.0169698	0.024	0.012	Muscle 1	Smp_181440	TYR_PHOSPHATASE_2 domain-containing protein	Source:UniProtKB/TrEMBL;Acc:A0A3Q0KU34]	schistosoma_mansoni_prjea36577	TYR_PHOSPHATASE_2 domain-containing protein [Source:UniProtKB/TrEMBL;Acc:A0A3Q0KU34]			SM_V10_3
0.506	0.0129135	0.012	0.0186303	0.118	0.107	Muscle 1	Smp_070770	Ubiquitin-fold modifier-conjugating enzyme 1	Source:UniProtKB/TrEMBL;Acc:A0A3Q0KHG1]	schistosoma_mansoni_prjea36577	Ubiquitin-fold modifier-conjugating enzyme 1 [Source:UniProtKB/TrEMBL;Acc:A0A3Q0KHG1]			SM_V10_3
0.506	0.0125428	0.012	0.0180954	0.033	0.021	Muscle 1	Smp_347790	Cadherin	Source:UniProtKB/TrEMBL;Acc:A0A5K4FH60]	schistosoma_mansoni_prjea36577	Cadherin [Source:UniProtKB/TrEMBL;Acc:A0A5K4FH60]			SM_V10_3
0.506	0.00937166	0.012	0.0135204	0.055	0.043	Muscle 1	Smp_333500	Actin-binding LIM protein 1	Source:UniProtKB/TrEMBL;Acc:A0A5K4FA43]	schistosoma_mansoni_prjea36577	Actin-binding LIM protein 1 [Source:UniProtKB/TrEMBL;Acc:A0A5K4FA43]			SM_V10_3
0.506	0.015005	0.012	0.0216477	0.118	0.107	Muscle 1	Smp_151780	MTS domain-containing protein	Source:UniProtKB/TrEMBL;Acc:C4QC82]	schistosoma_mansoni_prjea36577	MTS domain-containing protein [Source:UniProtKB/TrEMBL;Acc:C4QC82]			SM_V10_3
0.506	0.0120474	0.012	0.0173808	0.024	0.012	Muscle 1	Smp_140620	Putative g-protein coupled receptor	Source:UniProtKB/TrEMBL;Acc:A0A3Q0KN47]	schistosoma_mansoni_prjea36577	Putative g-protein coupled receptor [Source:UniProtKB/TrEMBL;Acc:A0A3Q0KN47]			SM_V10_2
0.506	0.0121107	0.012	0.017472	0.043	0.032	Muscle 1	Smp_047540	Putative f-box and wd40 domain protein	Source:UniProtKB/TrEMBL;Acc:A0A3Q0KFH3]	schistosoma_mansoni_prjea36577	Putative f-box and wd40 domain protein [Source:UniProtKB/TrEMBL;Acc:A0A3Q0KFH3]			SM_V10_2
0.506	0.0180695	0.012	0.0260688	0.328	0.319	Muscle 1	Smp_130170	NEDD8	Source:UniProtKB/TrEMBL;Acc:G4VBV9]	schistosoma_mansoni_prjea36577	NEDD8 [Source:UniProtKB/TrEMBL;Acc:G4VBV9]			SM_V10_2
0.506	0.0146744	0.012	0.0211706	0.047	0.034	Muscle 1	Smp_024520	Rab GDP dissociation inhibitor	Source:UniProtKB/TrEMBL;Acc:G4VC26]	schistosoma_mansoni_prjea36577	Rab GDP dissociation inhibitor [Source:UniProtKB/TrEMBL;Acc:G4VC26]			SM_V10_2
0.506	0.0101401	0.012	0.0146291	0.056	0.044	Muscle 1	Smp_133700	Putative udp-glucose glycoprotein:glucosyltransferase	Source:UniProtKB/TrEMBL;Acc:A0A5K4EMD1]	schistosoma_mansoni_prjea36577	Putative udp-glucose glycoprotein:glucosyltransferase [Source:UniProtKB/TrEMBL;Acc:A0A5K4EMD1]			SM_V10_2
0.506	0.0142065	0.012	0.0204956	0.019	0.006	Muscle 1	Smp_139180	Smp_139180	Smp_139180~	schistosoma_mansoni_prjea36577				SM_V10_1
0.506	0.00727241	0.012	0.0104919	0.153	0.142	Muscle 1	Smp_055960	Putative ubiquitin-conjugating enzyme E2r	Source:UniProtKB/TrEMBL;Acc:G4VB90]	schistosoma_mansoni_prjea36577	Putative ubiquitin-conjugating enzyme E2r [Source:UniProtKB/TrEMBL;Acc:G4VB90]			SM_V10_1
0.506	0.0101376	0.012	0.0146255	0.043	0.032	Muscle 1	Smp_040570	Putative rab5	Source:UniProtKB/TrEMBL;Acc:A0A3Q0KES8]	schistosoma_mansoni_prjea36577	Putative rab5 [Source:UniProtKB/TrEMBL;Acc:A0A3Q0KES8]			SM_V10_1
0.506	0.0109753	0.012	0.015834	0.067	0.055	Muscle 1	Smp_159150	HMG box domain-containing protein	Source:UniProtKB/TrEMBL;Acc:A0A3Q0KRE4]	schistosoma_mansoni_prjea36577	HMG box domain-containing protein [Source:UniProtKB/TrEMBL;Acc:A0A3Q0KRE4]			SM_V10_1
0.506	0.0127596	0.012	0.0184082	0.109	0.098	Muscle 1	Smp_176960	ELL domain-containing protein	Source:UniProtKB/TrEMBL;Acc:A0A3Q0KTP6]	schistosoma_mansoni_prjea36577	ELL domain-containing protein [Source:UniProtKB/TrEMBL;Acc:A0A3Q0KTP6]			SM_V10_1
0.506	0.0113569	0.012	0.0163845	0.013	0.002	Muscle 1	Smp_319720	MEG-14	Source:UniProtKB/TrEMBL;Acc:A0A5K4F8M2]	schistosoma_mansoni_prjea36577	MEG-14 [Source:UniProtKB/TrEMBL;Acc:A0A5K4F8M2]			SM_V10_1
0.506	0.0122712	0.012	0.0177037	0.067	0.054	Muscle 1	Smp_071150	Formin binding protein and related proteins	Source:UniProtKB/TrEMBL;Acc:A0A3Q0KHD4]	schistosoma_mansoni_prjea36577	Formin binding protein and related proteins [Source:UniProtKB/TrEMBL;Acc:A0A3Q0KHD4]			SM_V10_1
0.506	0.0148143	0.012	0.0213726	0.016	0.004	Muscle 1	Smp_176390	Putative cadherin	Source:UniProtKB/TrEMBL;Acc:A0A3Q0KTL6]	schistosoma_mansoni_prjea36577	Putative cadherin [Source:UniProtKB/TrEMBL;Acc:A0A3Q0KTL6]			SM_V10_1
0.506	0.0106908	0.012	0.0154236	0.019	0.008	Muscle 1	Smp_247030	Putative protocadherin alpha	Source:UniProtKB/TrEMBL;Acc:A0A5K4F2C8]	schistosoma_mansoni_prjea36577	Putative protocadherin alpha [Source:UniProtKB/TrEMBL;Acc:A0A5K4F2C8]			SM_V10_1
0.506	0.00994525	0.012	0.014348	0.1	0.089	Muscle 1	Smp_180740	Putative zinc finger protein	Source:UniProtKB/TrEMBL;Acc:A0A3Q0KU03]	schistosoma_mansoni_prjea36577	Putative zinc finger protein [Source:UniProtKB/TrEMBL;Acc:A0A3Q0KU03]			SM_V10_1
0.506	0.0110358	0.012	0.0159213	0.079	0.066	Muscle 1	Smp_158450	Kelch-like protein	Source:UniProtKB/TrEMBL;Acc:A0A3Q0KQY9]	schistosoma_mansoni_prjea36577	Kelch-like protein [Source:UniProtKB/TrEMBL;Acc:A0A3Q0KQY9]			SM_V10_1
0.506	0.0119729	0.012	0.0172732	0.019	0.006	Muscle 1	Smp_127220	G_PROTEIN_RECEP_F1_2 domain-containing protein	Source:UniProtKB/TrEMBL;Acc:A0A3Q0KL75]	schistosoma_mansoni_prjea36577	G_PROTEIN_RECEP_F1_2 domain-containing protein [Source:UniProtKB/TrEMBL;Acc:A0A3Q0KL75]			SM_V10_1
0.506	0.0347041	0.012	0.0500674	0.403	0.405	Muscle 1	Smp_028100	Putative ubiquitin-conjugating enzyme E2 G	Source:UniProtKB/TrEMBL;Acc:G4V624]	schistosoma_mansoni_prjea36577	Putative ubiquitin-conjugating enzyme E2 G [Source:UniProtKB/TrEMBL;Acc:G4V624]			SM_V10_1
0.506	0.0119631	0.012	0.0172591	0.028	0.017	Muscle 1	Smp_007070	Putative g-protein coupled receptor	Source:UniProtKB/TrEMBL;Acc:A0A3Q0KBZ4]	schistosoma_mansoni_prjea36577	Putative g-protein coupled receptor [Source:UniProtKB/TrEMBL;Acc:A0A3Q0KBZ4]			SM_V10_1
0.506	0.00987484	0.012	0.0142464	0.038	0.027	Muscle 1	Smp_136190	Nuclear protein MDM1	Source:UniProtKB/TrEMBL;Acc:A0A3Q0KMH2]	schistosoma_mansoni_prjea36577	Nuclear protein MDM1 [Source:UniProtKB/TrEMBL;Acc:A0A3Q0KMH2]			SM_V10_1
0.506	0.0301388	0.012	0.0434811	0.209	0.2	Muscle 1	Smp_140290	U4/U6.U5 small nuclear ribonucleoprotein 27 kDa protein	Source:UniProtKB/TrEMBL;Acc:G4LVA5]	schistosoma_mansoni_prjea36577	U4/U6.U5 small nuclear ribonucleoprotein 27 kDa protein [Source:UniProtKB/TrEMBL;Acc:G4LVA5]			SM_V10_1
0.506	0.0121779	0.012	0.017569	0.059	0.047	Muscle 1	Smp_140430	Adenosine deaminase-related	Source:UniProtKB/TrEMBL;Acc:G4LVD7]	schistosoma_mansoni_prjea36577	Adenosine deaminase-related [Source:UniProtKB/TrEMBL;Acc:G4LVD7]			SM_V10_1
0.506	0.0147949	0.012	0.0213445	0.17	0.158	Muscle 1	Smp_071560	Transmembrane protein 147	Source:UniProtKB/TrEMBL;Acc:G4V9J3]	schistosoma_mansoni_prjea36577	Transmembrane protein 147 [Source:UniProtKB/TrEMBL;Acc:G4V9J3]			SM_V10_1
0.506	0.0127542	0.012	0.0184005	0.032	0.019	Muscle 1	Smp_159780	Cadherin domain-containing protein	Source:UniProtKB/TrEMBL;Acc:A0A3Q0KR77]	schistosoma_mansoni_prjea36577	Cadherin domain-containing protein [Source:UniProtKB/TrEMBL;Acc:A0A3Q0KR77]			SM_V10_1
0.506	0.0155261	0.012	0.0223994	0.063	0.05	Muscle 1	Smp_163210	Putative WD-repeat protein	Source:UniProtKB/TrEMBL;Acc:A0A5K4ETY1]	schistosoma_mansoni_prjea36577	Putative WD-repeat protein [Source:UniProtKB/TrEMBL;Acc:A0A5K4ETY1]			SM_V10_1
0.506	0.0124019	0.012	0.0178921	0.028	0.015	Muscle 1	Smp_152290	Putative beta-arrestin 1	Source:UniProtKB/TrEMBL;Acc:A0A3Q0KQ21]	schistosoma_mansoni_prjea36577	Putative beta-arrestin 1 [Source:UniProtKB/TrEMBL;Acc:A0A3Q0KQ21]			SM_V10_1
0.494	0.00417704	0.012	0.00602619	0.25	0.269	Muscle 1	Smp_008770	Putative mitochondrial 28S ribosomal protein S32 (S32mt) (MRP-S32)	Source:UniProtKB/TrEMBL;Acc:G4VII4]	schistosoma_mansoni_prjea36577	Putative mitochondrial 28S ribosomal protein S32 (S32mt) (MRP-S32) [Source:UniProtKB/TrEMBL;Acc:G4VII4]			SM_V10_4
0.494	0.00190907	0.012	0.00275421	0.186	0.201	Muscle 1	Smp_136740	Putative torsin A	Source:UniProtKB/TrEMBL;Acc:A0A3Q0KMN1]	schistosoma_mansoni_prjea36577	Putative torsin A [Source:UniProtKB/TrEMBL;Acc:A0A3Q0KMN1]			SM_V10_3
0.494	9.71e-05	0.012	0.00014014	0.209	0.224	Muscle 1	Smp_029900	Peptidyl-prolyl cis-trans isomerase	Source:UniProtKB/TrEMBL;Acc:G4VFI9]	schistosoma_mansoni_prjea36577	Peptidyl-prolyl cis-trans isomerase [Source:UniProtKB/TrEMBL;Acc:G4VFI9]			SM_V10_3
0.505	0.0115	0.01	0.016591	0.119	0.108	Muscle 1	Smp_098090	Translational activator of cytochrome c oxidase 1	Source:UniProtKB/TrEMBL;Acc:G4LV96]	schistosoma_mansoni_prjea36577	Translational activator of cytochrome c oxidase 1 [Source:UniProtKB/TrEMBL;Acc:G4LV96]			SM_V10_Z
0.505	0.00791921	0.01	0.011425	0.036	0.027	Muscle 1	Smp_173120	Phosphatidic acid phosphatase type 2-related	Source:UniProtKB/TrEMBL;Acc:G4VSX4]	schistosoma_mansoni_prjea36577	Phosphatidic acid phosphatase type 2-related [Source:UniProtKB/TrEMBL;Acc:G4VSX4]			SM_V10_Z
0.505	0.0166026	0.01	0.0239525	0.161	0.153	Muscle 1	Smp_077400	Autophagy-related protein 3	Source:UniProtKB/TrEMBL;Acc:G4VTM4]	schistosoma_mansoni_prjea36577	Autophagy-related protein 3 [Source:UniProtKB/TrEMBL;Acc:G4VTM4]			SM_V10_Z
0.505	0.00896175	0.01	0.0129291	0.1	0.09	Muscle 1	Smp_155000	Pumilio, putative	Source:UniProtKB/TrEMBL;Acc:A0A3Q0KQH7]	schistosoma_mansoni_prjea36577	Pumilio, putative [Source:UniProtKB/TrEMBL;Acc:A0A3Q0KQH7]			SM_V10_Z
0.505	0.0313708	0.01	0.0452586	0.382	0.388	Muscle 1	Smp_143780	T-complex-associated-testis-expressed 1-related	Source:UniProtKB/TrEMBL;Acc:G4VSR3]	schistosoma_mansoni_prjea36577	T-complex-associated-testis-expressed 1-related [Source:UniProtKB/TrEMBL;Acc:G4VSR3]			SM_V10_Z
0.505	0.0193321	0.01	0.0278903	0.986	0.99	Muscle 1	Smp_054240	Translationally-controlled tumor protein homolog	Source:UniProtKB/TrEMBL;Acc:A0A3Q0KG11]	schistosoma_mansoni_prjea36577	Translationally-controlled tumor protein homolog [Source:UniProtKB/TrEMBL;Acc:A0A3Q0KG11]			SM_V10_Z
0.505	0.0108555	0.01	0.0156612	0.012	0.003	Muscle 1	Smp_155970	Twik family of potassium channels-related	Source:UniProtKB/TrEMBL;Acc:A0A3Q0KQG8]	schistosoma_mansoni_prjea36577	Twik family of potassium channels-related [Source:UniProtKB/TrEMBL;Acc:A0A3Q0KQG8]			SM_V10_Z
0.505	0.00710136	0.01	0.0102451	0.05	0.041	Muscle 1	Smp_096640	Serine/threonine kinase	Source:UniProtKB/TrEMBL;Acc:G4VR95]	schistosoma_mansoni_prjea36577	Serine/threonine kinase [Source:UniProtKB/TrEMBL;Acc:G4VR95]			SM_V10_Z
0.505	0.0149911	0.01	0.0216276	0.112	0.102	Muscle 1	Smp_174660	DNA-directed RNA polymerase I subunit RPA43	Source:UniProtKB/TrEMBL;Acc:G4VR08]	schistosoma_mansoni_prjea36577	DNA-directed RNA polymerase I subunit RPA43 [Source:UniProtKB/TrEMBL;Acc:G4VR08]			SM_V10_Z
0.505	0.00921479	0.01	0.0132941	0.016	0.006	Muscle 1	Smp_306270	RING-type E3 ubiquitin transferase	Source:UniProtKB/TrEMBL;Acc:A0A5K4F2E5]	schistosoma_mansoni_prjea36577	RING-type E3 ubiquitin transferase [Source:UniProtKB/TrEMBL;Acc:A0A5K4F2E5]			SM_V10_Z
0.505	0.0212833	0.01	0.0307053	0.107	0.098	Muscle 1	Smp_024240	Rcc1-related guanine nucleotide exchange factor	Source:UniProtKB/TrEMBL;Acc:G4VQ76]	schistosoma_mansoni_prjea36577	Rcc1-related guanine nucleotide exchange factor [Source:UniProtKB/TrEMBL;Acc:G4VQ76]			SM_V10_Z
0.505	0.0108726	0.01	0.0156858	0.037	0.027	Muscle 1	Smp_210970	Serine/threonine kinase	Source:UniProtKB/TrEMBL;Acc:A0A5K4EZW8]	schistosoma_mansoni_prjea36577	Serine/threonine kinase [Source:UniProtKB/TrEMBL;Acc:A0A5K4EZW8]			SM_V10_Z
0.505	0.0145946	0.01	0.0210555	0.04	0.029	Muscle 1	Smp_021370	Beta-1,4-galactosyltransferase	Source:UniProtKB/TrEMBL;Acc:A0A3Q0KD59]	schistosoma_mansoni_prjea36577	Beta-1,4-galactosyltransferase [Source:UniProtKB/TrEMBL;Acc:A0A3Q0KD59]			SM_V10_Z
0.505	0.0111545	0.01	0.0160925	0.045	0.036	Muscle 1	Smp_174310	Cation-transporting ATPase 13A3	Source:UniProtKB/TrEMBL;Acc:A0A5K4EX77]	schistosoma_mansoni_prjea36577	Cation-transporting ATPase 13A3 [Source:UniProtKB/TrEMBL;Acc:A0A5K4EX77]			SM_V10_Z
0.505	0.0220674	0.01	0.0318365	0.712	0.749	Muscle 1	Smp_341590	Conserved plasma membrane protein	Source:UniProtKB/TrEMBL;Acc:A0A5K4F9X3]	schistosoma_mansoni_prjea36577	Conserved plasma membrane protein [Source:UniProtKB/TrEMBL;Acc:A0A5K4F9X3]			SM_V10_Z
0.505	0.00978464	0.01	0.0141163	0.021	0.011	Muscle 1	Smp_126310	Putative syntrophin	Source:UniProtKB/TrEMBL;Acc:G4VPX9]	schistosoma_mansoni_prjea36577	Putative syntrophin [Source:UniProtKB/TrEMBL;Acc:G4VPX9]			SM_V10_Z
0.505	0.00707588	0.01	0.0102083	0.054	0.043	Muscle 1	Smp_056390	Protein kinase	Source:UniProtKB/TrEMBL;Acc:A0A3Q0KG94]	schistosoma_mansoni_prjea36577	Protein kinase [Source:UniProtKB/TrEMBL;Acc:A0A3Q0KG94]			SM_V10_Z
0.505	0.0101042	0.01	0.0145772	0.012	0.002	Muscle 1	Smp_015670	Putative paraxis	Source:UniProtKB/TrEMBL;Acc:G4VSK8]	schistosoma_mansoni_prjea36577	Putative paraxis [Source:UniProtKB/TrEMBL;Acc:G4VSK8]			SM_V10_Z
0.505	0.0103111	0.01	0.0148758	0.033	0.023	Muscle 1	Smp_123710	acetyl-CoA carboxylase	Source:UniProtKB/TrEMBL;Acc:A0A5K4EL31]	schistosoma_mansoni_prjea36577	acetyl-CoA carboxylase [Source:UniProtKB/TrEMBL;Acc:A0A5K4EL31]			SM_V10_Z
0.505	0.0303143	0.01	0.0437342	0.124	0.117	Muscle 1	Smp_349040	AA_TRNA_LIGASE_II domain-containing protein	Source:UniProtKB/TrEMBL;Acc:A0A5K4F9W2]	schistosoma_mansoni_prjea36577	AA_TRNA_LIGASE_II domain-containing protein [Source:UniProtKB/TrEMBL;Acc:A0A5K4F9W2]			SM_V10_7
0.505	0.0110982	0.01	0.0160114	0.126	0.116	Muscle 1	Smp_130230	Rac GTPase; Rac GTPase; Rac gtpase, putative	Source:UniProtKB/TrEMBL;Acc:Q8I898]	schistosoma_mansoni_prjea36577	Rac GTPase; Rac GTPase; Rac gtpase, putative [Source:UniProtKB/TrEMBL;Acc:Q8I898]	Rac	UniProtKB Gene Name	SM_V10_7
0.505	0.005798	0.01	0.00836474	0.06	0.049	Muscle 1	Smp_246140	V-type proton ATPase subunit H	Source:UniProtKB/TrEMBL;Acc:A0A5K4F3X0]	schistosoma_mansoni_prjea36577	V-type proton ATPase subunit H [Source:UniProtKB/TrEMBL;Acc:A0A5K4F3X0]			SM_V10_7
0.505	0.0101527	0.01	0.0146472	0.123	0.113	Muscle 1	Smp_248030	Serine incorporator	Source:UniProtKB/TrEMBL;Acc:A0A5K4F313]	schistosoma_mansoni_prjea36577	Serine incorporator [Source:UniProtKB/TrEMBL;Acc:A0A5K4F313]			SM_V10_6
0.505	0.0156056	0.01	0.0225142	0.084	0.073	Muscle 1	Smp_011010	RRF domain-containing protein	Source:UniProtKB/TrEMBL;Acc:A0A3Q0KCA4]	schistosoma_mansoni_prjea36577	RRF domain-containing protein [Source:UniProtKB/TrEMBL;Acc:A0A3Q0KCA4]			SM_V10_6
0.505	0.0104339	0.01	0.0150529	0.112	0.104	Muscle 1	Smp_147020	Putative arf6 guanine nucleotide exchange factor	Source:UniProtKB/TrEMBL;Acc:A0A3Q0KPA2]	schistosoma_mansoni_prjea36577	Putative arf6 guanine nucleotide exchange factor [Source:UniProtKB/TrEMBL;Acc:A0A3Q0KPA2]			SM_V10_6
0.505	0.0229986	0.01	0.03318	0.128	0.119	Muscle 1	Smp_005330	Methionine--tRNA ligase, mitochondrial	Source:UniProtKB/TrEMBL;Acc:A0A5K4E9F3]	schistosoma_mansoni_prjea36577	Methionine--tRNA ligase, mitochondrial [Source:UniProtKB/TrEMBL;Acc:A0A5K4E9F3]			SM_V10_6
0.505	0.00928841	0.01	0.0134003	0.059	0.049	Muscle 1	Smp_138840	Syntaxin, putative	Source:UniProtKB/TrEMBL;Acc:A0A3Q0KN06]	schistosoma_mansoni_prjea36577	Syntaxin, putative [Source:UniProtKB/TrEMBL;Acc:A0A3Q0KN06]			SM_V10_6
0.505	0.00477082	0.01	0.00688284	0.078	0.068	Muscle 1	Smp_165710	U85	Source:UniProtKB/TrEMBL;Acc:A0A3Q0KSD1]	schistosoma_mansoni_prjea36577	U85 [Source:UniProtKB/TrEMBL;Acc:A0A3Q0KSD1]			SM_V10_6
0.505	0.00798636	0.01	0.0115219	0.029	0.019	Muscle 1	Smp_334630	Neur_chan_LBD domain-containing protein	Source:UniProtKB/TrEMBL;Acc:A0A5K4FCR6]	schistosoma_mansoni_prjea36577	Neur_chan_LBD domain-containing protein [Source:UniProtKB/TrEMBL;Acc:A0A5K4FCR6]			SM_V10_5
0.505	0.0120475	0.01	0.0173808	0.108	0.098	Muscle 1	Smp_334500	Smp_334500	Smp_334500~	schistosoma_mansoni_prjea36577				SM_V10_5
0.505	0.0142073	0.01	0.0204968	0.045	0.035	Muscle 1	Smp_334470	DNA polymerase zeta catalytic subunit	Source:UniProtKB/TrEMBL;Acc:A0A5K4FAI1]	schistosoma_mansoni_prjea36577	DNA polymerase zeta catalytic subunit [Source:UniProtKB/TrEMBL;Acc:A0A5K4FAI1]			SM_V10_5
0.505	0.0132378	0.01	0.0190981	0.042	0.031	Muscle 1	Smp_341620	FERM domain-containing protein	Source:UniProtKB/TrEMBL;Acc:A0A5K4FEF6]	schistosoma_mansoni_prjea36577	FERM domain-containing protein [Source:UniProtKB/TrEMBL;Acc:A0A5K4FEF6]			SM_V10_4
0.505	0.0116356	0.01	0.0167866	0.012	0.002	Muscle 1	Smp_343100	Homeobox domain-containing protein	Source:UniProtKB/TrEMBL;Acc:A0A5K4FEZ8]	schistosoma_mansoni_prjea36577	Homeobox domain-containing protein [Source:UniProtKB/TrEMBL;Acc:A0A5K4FEZ8]			SM_V10_4
0.505	0.00855578	0.01	0.0123434	0.038	0.028	Muscle 1	Smp_343090	DUF2428 domain-containing protein	Source:UniProtKB/TrEMBL;Acc:A0A5K4FDM5]	schistosoma_mansoni_prjea36577	DUF2428 domain-containing protein [Source:UniProtKB/TrEMBL;Acc:A0A5K4FDM5]			SM_V10_4
0.505	0.010421	0.01	0.0150343	0.042	0.032	Muscle 1	Smp_312950	GOLD domain-containing protein	Source:UniProtKB/TrEMBL;Acc:A0A5K4F5R5]	schistosoma_mansoni_prjea36577	GOLD domain-containing protein [Source:UniProtKB/TrEMBL;Acc:A0A5K4F5R5]			SM_V10_4
0.505	0.00788308	0.01	0.0113729	0.029	0.019	Muscle 1	Smp_045560	Annexin	Source:UniProtKB/TrEMBL;Acc:G4VI62]	schistosoma_mansoni_prjea36577	Annexin [Source:UniProtKB/TrEMBL;Acc:G4VI62]			SM_V10_4
0.505	0.00352306	0.01	0.00508269	0.066	0.056	Muscle 1	Smp_103560	Hypoxanthine phosphoribosyltransferase	Source:UniProtKB/TrEMBL;Acc:A0A3Q0KJY0]	schistosoma_mansoni_prjea36577	Hypoxanthine phosphoribosyltransferase [Source:UniProtKB/TrEMBL;Acc:A0A3Q0KJY0]			SM_V10_4
0.505	0.0104835	0.01	0.0151245	0.085	0.074	Muscle 1	Smp_343440	GBD/FH3 domain-containing protein	Source:UniProtKB/TrEMBL;Acc:A0A5K4FAK4]	schistosoma_mansoni_prjea36577	GBD/FH3 domain-containing protein [Source:UniProtKB/TrEMBL;Acc:A0A5K4FAK4]			SM_V10_4
0.505	0.00939725	0.01	0.0135574	0.031	0.021	Muscle 1	Smp_164730	Growth hormone secretagogue receptor,putative	Source:UniProtKB/TrEMBL;Acc:A0A3Q0KRY2]	schistosoma_mansoni_prjea36577	Growth hormone secretagogue receptor,putative [Source:UniProtKB/TrEMBL;Acc:A0A3Q0KRY2]			SM_V10_4
0.505	0.00790703	0.01	0.0114074	0.04	0.031	Muscle 1	Smp_000790	Actin binding LIM protein family member 2-related	Source:UniProtKB/TrEMBL;Acc:A0A5K4E8J8]	schistosoma_mansoni_prjea36577	Actin binding LIM protein family member 2-related [Source:UniProtKB/TrEMBL;Acc:A0A5K4E8J8]			SM_V10_3
0.505	0.0109542	0.01	0.0158036	0.047	0.037	Muscle 1	Smp_001030	5'-amp-activated protein kinase gamma-2 non-catalytic subunit transcript variant 2	Source:UniProtKB/TrEMBL;Acc:A0A3Q0KBF7]	schistosoma_mansoni_prjea36577	5'-amp-activated protein kinase gamma-2 non-catalytic subunit transcript variant 2 [Source:UniProtKB/TrEMBL;Acc:A0A3Q0KBF7]			SM_V10_3
0.505	0.00559314	0.01	0.0080692	0.056	0.045	Muscle 1	Smp_092500	Thioredoxin domain-containing protein 17	Source:UniProtKB/TrEMBL;Acc:G4V5Q2]	schistosoma_mansoni_prjea36577	Thioredoxin domain-containing protein 17 [Source:UniProtKB/TrEMBL;Acc:G4V5Q2]			SM_V10_3
0.505	0.00207205	0.01	0.00298934	0.85	0.871	Muscle 1	Smp_100090	High mobility group B1; High mobility group B1 protein	Source:UniProtKB/TrEMBL;Acc:Q6RYS1]	schistosoma_mansoni_prjea36577	High mobility group B1; High mobility group B1 protein [Source:UniProtKB/TrEMBL;Acc:Q6RYS1]	HMGB1	UniProtKB Gene Name	SM_V10_3
0.505	0.00612699	0.01	0.00883938	0.08	0.069	Muscle 1	Smp_309590	Guanylate kinase-like domain-containing protein	Source:UniProtKB/TrEMBL;Acc:A0A5K4F3E6]	schistosoma_mansoni_prjea36577	Guanylate kinase-like domain-containing protein [Source:UniProtKB/TrEMBL;Acc:A0A5K4F3E6]			SM_V10_3
0.505	0.00667083	0.01	0.00962398	0.059	0.048	Muscle 1	Smp_134880	Snurportin-1	Source:UniProtKB/TrEMBL;Acc:G4VFS6]	schistosoma_mansoni_prjea36577	Snurportin-1 [Source:UniProtKB/TrEMBL;Acc:G4VFS6]			SM_V10_3
0.505	0.0178399	0.01	0.0257375	0.346	0.341	Muscle 1	Smp_326620	Cysteine-rich DPF motif domain-containing protein 1	Source:UniProtKB/TrEMBL;Acc:A0A146MJ75]	schistosoma_mansoni_prjea36577	Cysteine-rich DPF motif domain-containing protein 1 [Source:UniProtKB/TrEMBL;Acc:A0A146MJ75]			SM_V10_3
0.505	0.00981412	0.01	0.0141588	0.04	0.029	Muscle 1	Smp_138500	Centaurin/arf-related	Source:UniProtKB/TrEMBL;Acc:A0A3Q0KMU4]	schistosoma_mansoni_prjea36577	Centaurin/arf-related [Source:UniProtKB/TrEMBL;Acc:A0A3Q0KMU4]			SM_V10_3
0.505	0.00994236	0.01	0.0143438	0.041	0.031	Muscle 1	Smp_168200	F-box domain-containing protein	Source:UniProtKB/TrEMBL;Acc:A0A3Q0KSF3]	schistosoma_mansoni_prjea36577	F-box domain-containing protein [Source:UniProtKB/TrEMBL;Acc:A0A3Q0KSF3]			SM_V10_3
0.505	0.00219124	0.01	0.00316129	0.774	0.797	Muscle 1	Smp_010160	Putative chaperone binding protein	Source:UniProtKB/TrEMBL;Acc:A0A3Q0KC80]	schistosoma_mansoni_prjea36577	Putative chaperone binding protein [Source:UniProtKB/TrEMBL;Acc:A0A3Q0KC80]			SM_V10_3
0.505	0.0108834	0.01	0.0157015	0.089	0.08	Muscle 1	Smp_073940	WD-repeat protein, putative	Source:UniProtKB/TrEMBL;Acc:A0A3Q0KHR2]	schistosoma_mansoni_prjea36577	WD-repeat protein, putative [Source:UniProtKB/TrEMBL;Acc:A0A3Q0KHR2]			SM_V10_3
0.505	0.0106659	0.01	0.0153876	0.087	0.076	Muscle 1	Smp_052890	Thioredoxin domain-containing protein	Source:UniProtKB/TrEMBL;Acc:A0A3Q0KFZ1]	schistosoma_mansoni_prjea36577	Thioredoxin domain-containing protein [Source:UniProtKB/TrEMBL;Acc:A0A3Q0KFZ1]			SM_V10_3
0.505	0.0133973	0.01	0.0193283	0.132	0.122	Muscle 1	Smp_004350	Ubiquitin-conjugating enzyme E2 l, putative	Source:UniProtKB/TrEMBL;Acc:G4LXI7]	schistosoma_mansoni_prjea36577	Ubiquitin-conjugating enzyme E2 l, putative [Source:UniProtKB/TrEMBL;Acc:G4LXI7]			SM_V10_3
0.505	0.0077084	0.01	0.0111209	0.064	0.055	Muscle 1	Smp_341840	Transmembrane protein	Source:UniProtKB/TrEMBL;Acc:A0A5K4FD78]	schistosoma_mansoni_prjea36577	Transmembrane protein [Source:UniProtKB/TrEMBL;Acc:A0A5K4FD78]			SM_V10_3
0.505	0.0192151	0.01	0.0277215	0.332	0.33	Muscle 1	Smp_347830	Smp_347830	Smp_347830~	schistosoma_mansoni_prjea36577				SM_V10_3
0.505	0.0044415	0.01	0.00640772	0.051	0.042	Muscle 1	Smp_166390	WW domain-containing protein	Source:UniProtKB/TrEMBL;Acc:A0A3Q0KSG6]	schistosoma_mansoni_prjea36577	WW domain-containing protein [Source:UniProtKB/TrEMBL;Acc:A0A3Q0KSG6]			SM_V10_2
0.505	0.0113189	0.01	0.0163297	0.035	0.024	Muscle 1	Smp_134080	Inositol transporter	Source:UniProtKB/TrEMBL;Acc:A0A5K4ENE0]	schistosoma_mansoni_prjea36577	Inositol transporter [Source:UniProtKB/TrEMBL;Acc:A0A5K4ENE0]			SM_V10_2
0.505	0.0101694	0.01	0.0146713	0.048	0.039	Muscle 1	Smp_146310	Exonuclease domain-containing protein	Source:UniProtKB/TrEMBL;Acc:A0A3Q0KPC4]	schistosoma_mansoni_prjea36577	Exonuclease domain-containing protein [Source:UniProtKB/TrEMBL;Acc:A0A3Q0KPC4]			SM_V10_2
0.505	0.0106652	0.01	0.0153866	0.055	0.046	Muscle 1	Smp_154870	Signal transduction protein lnk-related	Source:UniProtKB/TrEMBL;Acc:A0A3Q0KQG6]	schistosoma_mansoni_prjea36577	Signal transduction protein lnk-related [Source:UniProtKB/TrEMBL;Acc:A0A3Q0KQG6]			SM_V10_2
0.505	0.00960084	0.01	0.0138511	0.103	0.092	Muscle 1	Smp_014400	Enhancer of polycomb-like protein	Source:UniProtKB/TrEMBL;Acc:G4LXP3]	schistosoma_mansoni_prjea36577	Enhancer of polycomb-like protein [Source:UniProtKB/TrEMBL;Acc:G4LXP3]			SM_V10_2
0.505	0.0172764	0.01	0.0249246	0.104	0.094	Muscle 1	Smp_148280	ANK_REP_REGION domain-containing protein	Source:UniProtKB/TrEMBL;Acc:G4VBY6]	schistosoma_mansoni_prjea36577	ANK_REP_REGION domain-containing protein [Source:UniProtKB/TrEMBL;Acc:G4VBY6]			SM_V10_2
0.505	0.0130029	0.01	0.0187592	0.057	0.047	Muscle 1	Smp_344100	t-SNARE coiled-coil homology domain-containing protein	Source:UniProtKB/TrEMBL;Acc:A0A5K4FAV0]	schistosoma_mansoni_prjea36577	t-SNARE coiled-coil homology domain-containing protein [Source:UniProtKB/TrEMBL;Acc:A0A5K4FAV0]			SM_V10_2
0.505	0.0123806	0.01	0.0178615	0.043	0.032	Muscle 1	Smp_148400	Putative calmodulin-binding transcription activator (Camta)	Source:UniProtKB/TrEMBL;Acc:A0A5K4ERV6]	schistosoma_mansoni_prjea36577	Putative calmodulin-binding transcription activator (Camta) [Source:UniProtKB/TrEMBL;Acc:A0A5K4ERV6]			SM_V10_2
0.505	0.0102127	0.01	0.0147339	0.02	0.011	Muscle 1	Smp_122950	SH2 domain-containing protein	Source:UniProtKB/TrEMBL;Acc:A0A3Q0KKD8]	schistosoma_mansoni_prjea36577	SH2 domain-containing protein [Source:UniProtKB/TrEMBL;Acc:A0A3Q0KKD8]			SM_V10_2
0.505	0.00873297	0.01	0.012599	0.03	0.021	Muscle 1	Smp_004190	Putative cationic amino acid transporter	Source:UniProtKB/TrEMBL;Acc:G4VCI8]	schistosoma_mansoni_prjea36577	Putative cationic amino acid transporter [Source:UniProtKB/TrEMBL;Acc:G4VCI8]			SM_V10_2
0.505	0.00714493	0.01	0.010308	0.057	0.048	Muscle 1	Smp_315850	1-phosphatidylinositol-3-phosphate 5-kinase	Source:UniProtKB/TrEMBL;Acc:A0A5K4F5R7]	schistosoma_mansoni_prjea36577	1-phosphatidylinositol-3-phosphate 5-kinase [Source:UniProtKB/TrEMBL;Acc:A0A5K4F5R7]			SM_V10_2
0.505	0.00922148	0.01	0.0133038	0.015	0.005	Muscle 1	Smp_245580	Putative cadherin	Source:UniProtKB/TrEMBL;Acc:A0A5K4F0J7]	schistosoma_mansoni_prjea36577	Putative cadherin [Source:UniProtKB/TrEMBL;Acc:A0A5K4F0J7]			SM_V10_2
0.505	0.00877246	0.01	0.012656	0.043	0.032	Muscle 1	Smp_133620	Putative leucine-rich repeat-containing protein	Source:UniProtKB/TrEMBL;Acc:A0A3Q0KMA2]	schistosoma_mansoni_prjea36577	Putative leucine-rich repeat-containing protein [Source:UniProtKB/TrEMBL;Acc:A0A3Q0KMA2]			SM_V10_2
0.505	0.014913	0.01	0.0215149	0.168	0.158	Muscle 1	Smp_017470	Selenoprotein S	Source:UniProtKB/TrEMBL;Acc:G4LW66]	schistosoma_mansoni_prjea36577	Selenoprotein S [Source:UniProtKB/TrEMBL;Acc:G4LW66]			SM_V10_1
0.505	0.00952527	0.01	0.0137421	0.043	0.032	Muscle 1	Smp_155330	Serine/threonine kinase	Source:UniProtKB/TrEMBL;Acc:A0A3Q0KQI3]	schistosoma_mansoni_prjea36577	Serine/threonine kinase [Source:UniProtKB/TrEMBL;Acc:A0A3Q0KQI3]			SM_V10_1
0.505	0.00461704	0.01	0.00666099	0.043	0.034	Muscle 1	Smp_143260	Ig-like domain-containing protein	Source:UniProtKB/TrEMBL;Acc:A0A3Q0KNN1]	schistosoma_mansoni_prjea36577	Ig-like domain-containing protein [Source:UniProtKB/TrEMBL;Acc:A0A3Q0KNN1]			SM_V10_1
0.505	0.00983302	0.01	0.0141861	0.02	0.011	Muscle 1	Smp_194740	Putative g-protein coupled receptor	Source:UniProtKB/TrEMBL;Acc:A0A3Q0KUB7]	schistosoma_mansoni_prjea36577	Putative g-protein coupled receptor [Source:UniProtKB/TrEMBL;Acc:A0A3Q0KUB7]			SM_V10_1
0.505	0.0111299	0.01	0.016057	0.033	0.023	Muscle 1	Smp_048050	Putative alpha crystallin A chain; Putative heat shock protein hsp16	Source:UniProtKB/TrEMBL;Acc:A0A3Q0KFJ4]	schistosoma_mansoni_prjea36577	Putative alpha crystallin A chain; Putative heat shock protein hsp16 [Source:UniProtKB/TrEMBL;Acc:A0A3Q0KFJ4]			SM_V10_1
0.505	0.00577724	0.01	0.00833479	0.045	0.035	Muscle 1	Smp_086830	Putative spfh domain / Band 7 family protein	Source:UniProtKB/TrEMBL;Acc:G4V8L7]	schistosoma_mansoni_prjea36577	Putative spfh domain / Band 7 family protein [Source:UniProtKB/TrEMBL;Acc:G4V8L7]			SM_V10_1
0.505	0.0171133	0.01	0.0246893	0.107	0.098	Muscle 1	Smp_246990	CBFD_NFYB_HMF domain-containing protein	Source:UniProtKB/TrEMBL;Acc:A0A5K4F2N7]	schistosoma_mansoni_prjea36577	CBFD_NFYB_HMF domain-containing protein [Source:UniProtKB/TrEMBL;Acc:A0A5K4F2N7]			SM_V10_1
0.505	0.00911847	0.01	0.0131552	0.071	0.06	Muscle 1	Smp_210820	Protein-serine/threonine kinase	Source:UniProtKB/TrEMBL;Acc:A0A3Q0KV99]	schistosoma_mansoni_prjea36577	Protein-serine/threonine kinase [Source:UniProtKB/TrEMBL;Acc:A0A3Q0KV99]			SM_V10_1
0.505	0.00906487	0.01	0.0130778	0.057	0.048	Muscle 1	Smp_301780	Protein kinase domain-containing protein	Source:UniProtKB/TrEMBL;Acc:A0A5K4F217]	schistosoma_mansoni_prjea36577	Protein kinase domain-containing protein [Source:UniProtKB/TrEMBL;Acc:A0A5K4F217]			SM_V10_1
0.505	0.0124736	0.01	0.0179956	0.069	0.06	Muscle 1	Smp_028120	Dynamin-like 120 kDa protein, mitochondrial	Source:UniProtKB/TrEMBL;Acc:A0A3Q0KDR5]	schistosoma_mansoni_prjea36577	Dynamin-like 120 kDa protein, mitochondrial [Source:UniProtKB/TrEMBL;Acc:A0A3Q0KDR5]			SM_V10_1
0.505	0.0107295	0.01	0.0154795	0.013	0.003	Muscle 1	Smp_140250	Putative g-protein coupled receptor	Source:UniProtKB/TrEMBL;Acc:A0A3Q0KN23]	schistosoma_mansoni_prjea36577	Putative g-protein coupled receptor [Source:UniProtKB/TrEMBL;Acc:A0A3Q0KN23]			SM_V10_1
0.505	0.0107017	0.01	0.0154393	0.075	0.066	Muscle 1	Smp_246680	Mitotic spindle assembly checkpoint protein MAD1	Source:UniProtKB/TrEMBL;Acc:A0A5K4F432]	schistosoma_mansoni_prjea36577	Mitotic spindle assembly checkpoint protein MAD1 [Source:UniProtKB/TrEMBL;Acc:A0A5K4F432]			SM_V10_1
0.505	0.0146067	0.01	0.021073	0.076	0.067	Muscle 1	Smp_035080	N-acetylglucosaminylphosphatidylinositol deacetylase	Source:UniProtKB/TrEMBL;Acc:A0A3Q0KED4]	schistosoma_mansoni_prjea36577	N-acetylglucosaminylphosphatidylinositol deacetylase [Source:UniProtKB/TrEMBL;Acc:A0A3Q0KED4]			SM_V10_1
0.505	0.0102555	0.01	0.0147955	0.033	0.024	Muscle 1	Smp_167360	BTB domain-containing protein	Source:UniProtKB/TrEMBL;Acc:A0A3Q0KSA9]	schistosoma_mansoni_prjea36577	BTB domain-containing protein [Source:UniProtKB/TrEMBL;Acc:A0A3Q0KSA9]			SM_V10_1
0.505	0.00892674	0.01	0.0128786	0.05	0.039	Muscle 1	Smp_076910	Tetratricopeptide repeat protein 19 (TPR repeat protein 19), putative	Source:UniProtKB/TrEMBL;Acc:G4LXF2]	schistosoma_mansoni_prjea36577	Tetratricopeptide repeat protein 19 (TPR repeat protein 19), putative [Source:UniProtKB/TrEMBL;Acc:G4LXF2]			SM_V10_1
0.505	0.0108335	0.01	0.0156295	0.015	0.004	Muscle 1	Smp_105340	Putative cyclic nucleotide-gated ion channel	Source:UniProtKB/TrEMBL;Acc:A0A3Q0KJZ7]	schistosoma_mansoni_prjea36577	Putative cyclic nucleotide-gated ion channel [Source:UniProtKB/TrEMBL;Acc:A0A3Q0KJZ7]			SM_V10_1
0.505	0.0127317	0.01	0.018368	0.024	0.014	Muscle 1	Smp_194870	Histone H4	Source:UniProtKB/TrEMBL;Acc:C4QBN1]	schistosoma_mansoni_prjea36577	Histone H4 [Source:UniProtKB/TrEMBL;Acc:C4QBN1]			SM_V10_1
0.505	0.0134672	0.01	0.0194291	0.118	0.108	Muscle 1	Smp_079270	Crp-related	Source:UniProtKB/TrEMBL;Acc:G4V7B6]	schistosoma_mansoni_prjea36577	Crp-related [Source:UniProtKB/TrEMBL;Acc:G4V7B6]			SM_V10_1
0.505	0.00953034	0.01	0.0137494	0.097	0.086	Muscle 1	Smp_161970	Putative tangerin	Source:UniProtKB/TrEMBL;Acc:A0A5K4EUQ0]	schistosoma_mansoni_prjea36577	Putative tangerin [Source:UniProtKB/TrEMBL;Acc:A0A5K4EUQ0]			SM_V10_1
0.505	0.00532708	0.01	0.00768535	0.06	0.049	Muscle 1	Smp_130910	Smp_130910	Smp_130910~	schistosoma_mansoni_prjea36577				SM_V10_1
0.495	0.00493123	0.01	0.00711425	0.304	0.321	Muscle 1	Smp_341550	Guanine nucleotide exchange factor mss4,putative	Source:UniProtKB/TrEMBL;Acc:G4LUP9]	schistosoma_mansoni_prjea36577	Guanine nucleotide exchange factor mss4,putative [Source:UniProtKB/TrEMBL;Acc:G4LUP9]			SM_V10_Z
0.495	0.00439227	0.01	0.00633671	0.284	0.301	Muscle 1	Smp_067540	Smp_067540	Smp_067540~	schistosoma_mansoni_prjea36577				SM_V10_Z
0.495	0.00972242	0.01	0.0140265	0.241	0.258	Muscle 1	Smp_074260	Growth arrest and DNA damage-inducible proteins-interacting protein 1	Source:UniProtKB/TrEMBL;Acc:G4VLB2]	schistosoma_mansoni_prjea36577	Growth arrest and DNA damage-inducible proteins-interacting protein 1 [Source:UniProtKB/TrEMBL;Acc:G4VLB2]			SM_V10_6
0.495	0.00236749	0.01	0.00341556	0.154	0.166	Muscle 1	Smp_063390	L-aminoadipate-semialdehyde dehydrogenase-phosphopantetheinyl transferase	Source:UniProtKB/TrEMBL;Acc:A0A3Q0KGV2]	schistosoma_mansoni_prjea36577	L-aminoadipate-semialdehyde dehydrogenase-phosphopantetheinyl transferase [Source:UniProtKB/TrEMBL;Acc:A0A3Q0KGV2]			SM_V10_3
0.495	0.00742605	0.01	0.0107135	0.382	0.404	Muscle 1	Smp_028060	SURF6 domain-containing protein	Source:UniProtKB/TrEMBL;Acc:G4V631]	schistosoma_mansoni_prjea36577	SURF6 domain-containing protein [Source:UniProtKB/TrEMBL;Acc:G4V631]			SM_V10_1
0.504	0.00877036	0.008	0.0126529	0.008	0	Muscle 1	Smp_247800	Homeobox domain-containing protein	Source:UniProtKB/TrEMBL;Acc:A0A5K4F2Y4]	schistosoma_mansoni_prjea36577	Homeobox domain-containing protein [Source:UniProtKB/TrEMBL;Acc:A0A5K4F2Y4]			SM_V10_4
0.504	0.00695524	0.008	0.0100343	0.01	0.003	Muscle 1	Smp_176050	Rab6, putative	Source:UniProtKB/TrEMBL;Acc:A0A3Q0KTX8]	schistosoma_mansoni_prjea36577	Rab6, putative [Source:UniProtKB/TrEMBL;Acc:A0A3Q0KTX8]			SM_V10_Z
0.504	0.00558324	0.008	0.00805491	0.036	0.029	Muscle 1	Smp_333370	RAP domain-containing protein	Source:UniProtKB/TrEMBL;Acc:A0A5K4F8J1]	schistosoma_mansoni_prjea36577	RAP domain-containing protein [Source:UniProtKB/TrEMBL;Acc:A0A5K4F8J1]			SM_V10_Z
0.504	0.0066834	0.008	0.0096421	0.078	0.068	Muscle 1	Smp_070330	Putative fun14 domain containing	Source:UniProtKB/TrEMBL;Acc:A0A5K4EG51]	schistosoma_mansoni_prjea36577	Putative fun14 domain containing [Source:UniProtKB/TrEMBL;Acc:A0A5K4EG51]			SM_V10_Z
0.504	0.00770674	0.008	0.0111185	0.056	0.048	Muscle 1	Smp_070310	Putative ecotropic viral integration site	Source:UniProtKB/TrEMBL;Acc:A0A3Q0KHF1]	schistosoma_mansoni_prjea36577	Putative ecotropic viral integration site [Source:UniProtKB/TrEMBL;Acc:A0A3Q0KHF1]			SM_V10_Z
0.504	0.00507771	0.008	0.00732558	0.152	0.143	Muscle 1	Smp_032520	Putative lysosome-associated membrane glycoprotein	Source:UniProtKB/TrEMBL;Acc:G4VSF3]	schistosoma_mansoni_prjea36577	Putative lysosome-associated membrane glycoprotein [Source:UniProtKB/TrEMBL;Acc:G4VSF3]			SM_V10_Z
0.504	0.00690629	0.008	0.00996367	0.018	0.01	Muscle 1	Smp_039750	Alpha-1,4 glucan phosphorylase	Source:UniProtKB/TrEMBL;Acc:A0A5K4ECX3]	schistosoma_mansoni_prjea36577	Alpha-1,4 glucan phosphorylase [Source:UniProtKB/TrEMBL;Acc:A0A5K4ECX3]			SM_V10_Z
0.504	0.00795125	0.008	0.0114712	0.01	0.003	Muscle 1	Smp_323980	G_PROTEIN_RECEP_F1_2 domain-containing protein	Source:UniProtKB/TrEMBL;Acc:A0A5K4F5P8]	schistosoma_mansoni_prjea36577	G_PROTEIN_RECEP_F1_2 domain-containing protein [Source:UniProtKB/TrEMBL;Acc:A0A5K4F5P8]			SM_V10_Z
0.504	0.0094237	0.008	0.0135955	0.062	0.055	Muscle 1	Smp_242930	Long-chain-fatty-acid--CoA ligase	Source:UniProtKB/TrEMBL;Acc:C4Q5K0]	schistosoma_mansoni_prjea36577	Long-chain-fatty-acid--CoA ligase [Source:UniProtKB/TrEMBL;Acc:C4Q5K0]			SM_V10_Z
0.504	0.0087738	0.008	0.0126579	0.012	0.003	Muscle 1	Smp_347600	Protein kinase domain-containing protein	Source:UniProtKB/TrEMBL;Acc:A0A5K4FEJ0]	schistosoma_mansoni_prjea36577	Protein kinase domain-containing protein [Source:UniProtKB/TrEMBL;Acc:A0A5K4FEJ0]			SM_V10_Z
0.504	0.0122374	0.008	0.0176549	0.148	0.141	Muscle 1	Smp_060190	Ctg4a-related	Source:UniProtKB/TrEMBL;Acc:A0A3Q0KGK5]	schistosoma_mansoni_prjea36577	Ctg4a-related [Source:UniProtKB/TrEMBL;Acc:A0A3Q0KGK5]			SM_V10_Z
0.504	0.00875727	0.008	0.0126341	0.009	0.001	Muscle 1	Smp_323800	LITAF domain-containing protein	Source:UniProtKB/TrEMBL;Acc:A0A5K4F9L4]	schistosoma_mansoni_prjea36577	LITAF domain-containing protein [Source:UniProtKB/TrEMBL;Acc:A0A5K4F9L4]			SM_V10_Z
0.504	0.0136843	0.008	0.0197423	0.114	0.108	Muscle 1	Smp_060290	ubiquitinyl hydrolase 1	Source:UniProtKB/TrEMBL;Acc:G4VQM6]	schistosoma_mansoni_prjea36577	ubiquitinyl hydrolase 1 [Source:UniProtKB/TrEMBL;Acc:G4VQM6]			SM_V10_Z
0.504	0.00517036	0.008	0.00745926	0.035	0.027	Muscle 1	Smp_037960	Putative nachr subunit	Source:UniProtKB/TrEMBL;Acc:A0A3Q0KEK5]	schistosoma_mansoni_prjea36577	Putative nachr subunit [Source:UniProtKB/TrEMBL;Acc:A0A3Q0KEK5]			SM_V10_Z
0.504	0.0123538	0.008	0.0178227	0.067	0.059	Muscle 1	Smp_333170	phospholipase A2	Source:UniProtKB/TrEMBL;Acc:A0A5K4FAR8]	schistosoma_mansoni_prjea36577	phospholipase A2 [Source:UniProtKB/TrEMBL;Acc:A0A5K4FAR8]			SM_V10_Z
0.504	0.00470649	0.008	0.00679002	0.08	0.07	Muscle 1	Smp_046140	Protein kinase	Source:UniProtKB/TrEMBL;Acc:G4VPT2]	schistosoma_mansoni_prjea36577	Protein kinase [Source:UniProtKB/TrEMBL;Acc:G4VPT2]			SM_V10_Z
0.504	0.0051647	0.008	0.00745109	0.076	0.067	Muscle 1	Smp_076390	Glycolipid transfer protein (Gltp), putative	Source:UniProtKB/TrEMBL;Acc:A0A3Q0KHZ5]	schistosoma_mansoni_prjea36577	Glycolipid transfer protein (Gltp), putative [Source:UniProtKB/TrEMBL;Acc:A0A3Q0KHZ5]			SM_V10_Z
0.504	0.00166106	0.008	0.00239641	0.053	0.044	Muscle 1	Smp_047190	Serine/threonine kinase	Source:UniProtKB/TrEMBL;Acc:A0A3Q0KFH0]	schistosoma_mansoni_prjea36577	Serine/threonine kinase [Source:UniProtKB/TrEMBL;Acc:A0A3Q0KFH0]			SM_V10_Z
0.504	0.00685373	0.008	0.00988784	0.097	0.089	Muscle 1	Smp_132870	DNAj homolog subfamily B member, putative	Source:UniProtKB/TrEMBL;Acc:A0A3Q0KM45]	schistosoma_mansoni_prjea36577	DNAj homolog subfamily B member, putative [Source:UniProtKB/TrEMBL;Acc:A0A3Q0KM45]			SM_V10_Z
0.504	0.00901426	0.008	0.0130048	0.036	0.028	Muscle 1	Smp_345770	Phosphatase and actin regulator, putative	Source:UniProtKB/TrEMBL;Acc:A0A5K4FBI0]	schistosoma_mansoni_prjea36577	Phosphatase and actin regulator, putative [Source:UniProtKB/TrEMBL;Acc:A0A5K4FBI0]			SM_V10_Z
0.504	0.00731695	0.008	0.0105561	0.016	0.008	Muscle 1	Smp_128480	Protein kinase C	Source:UniProtKB/TrEMBL;Acc:A0A3Q0KLC5]	schistosoma_mansoni_prjea36577	Protein kinase C [Source:UniProtKB/TrEMBL;Acc:A0A3Q0KLC5]			SM_V10_Z
0.504	0.00857851	0.008	0.0123762	0.059	0.051	Muscle 1	Smp_165580	General transcription and DNA repair factor IIH helicase subunit XPB	Source:UniProtKB/TrEMBL;Acc:A0A3Q0KSC1]	schistosoma_mansoni_prjea36577	General transcription and DNA repair factor IIH helicase subunit XPB [Source:UniProtKB/TrEMBL;Acc:A0A3Q0KSC1]			SM_V10_Z
0.504	0.00494874	0.008	0.00713952	0.042	0.034	Muscle 1	Smp_171870	Putative sugar transporter	Source:UniProtKB/TrEMBL;Acc:A0A3Q0KSV1]	schistosoma_mansoni_prjea36577	Putative sugar transporter [Source:UniProtKB/TrEMBL;Acc:A0A3Q0KSV1]			SM_V10_Z
0.504	0.00859828	0.008	0.0124047	0.031	0.023	Muscle 1	Smp_058730	Tubby-like protein	Source:UniProtKB/TrEMBL;Acc:A0A3Q0KGF1]	schistosoma_mansoni_prjea36577	Tubby-like protein [Source:UniProtKB/TrEMBL;Acc:A0A3Q0KGF1]			SM_V10_Z
0.504	0.0118166	0.008	0.0170477	0.086	0.078	Muscle 1	Smp_172730	Aldehyde dehydrogenase	Source:UniProtKB/TrEMBL;Acc:A0A3Q0KTF3]	schistosoma_mansoni_prjea36577	Aldehyde dehydrogenase [Source:UniProtKB/TrEMBL;Acc:A0A3Q0KTF3]			SM_V10_Z
0.504	0.0218183	0.008	0.0314771	0.371	0.371	Muscle 1	Smp_028330	Coiled-coil domain-containing protein 25	Source:UniProtKB/TrEMBL;Acc:A0A3Q0KDR2]	schistosoma_mansoni_prjea36577	Coiled-coil domain-containing protein 25 [Source:UniProtKB/TrEMBL;Acc:A0A3Q0KDR2]			SM_V10_Z
0.504	0.00659059	0.008	0.00950821	0.048	0.04	Muscle 1	Smp_137530	TATA element modulatory factor	Source:UniProtKB/TrEMBL;Acc:A0A3Q0KMP0]	schistosoma_mansoni_prjea36577	TATA element modulatory factor [Source:UniProtKB/TrEMBL;Acc:A0A3Q0KMP0]			SM_V10_Z
0.504	0.00701448	0.008	0.0101198	0.051	0.044	Muscle 1	Smp_048560	LIMPETin; Putative four and A half lim domains	Source:UniProtKB/TrEMBL;Acc:G4VSB7]	schistosoma_mansoni_prjea36577	LIMPETin; Putative four and A half lim domains [Source:UniProtKB/TrEMBL;Acc:G4VSB7]			SM_V10_Z
0.504	0.00742657	0.008	0.0107143	0.04	0.031	Muscle 1	Smp_171720	Lipid phosphate phosphatase-related	Source:UniProtKB/TrEMBL;Acc:G4VJ83]	schistosoma_mansoni_prjea36577	Lipid phosphate phosphatase-related [Source:UniProtKB/TrEMBL;Acc:G4VJ83]			SM_V10_Z
0.504	0.00537585	0.008	0.00775571	0.175	0.168	Muscle 1	Smp_078110	Ashwin	Source:UniProtKB/TrEMBL;Acc:A0A3Q0KI35]	schistosoma_mansoni_prjea36577	Ashwin [Source:UniProtKB/TrEMBL;Acc:A0A3Q0KI35]			SM_V10_7
0.504	0.00260104	0.008	0.0037525	0.073	0.065	Muscle 1	Smp_144820	C2H2-type domain-containing protein	Source:UniProtKB/TrEMBL;Acc:A0A5K4EQI0]	schistosoma_mansoni_prjea36577	C2H2-type domain-containing protein [Source:UniProtKB/TrEMBL;Acc:A0A5K4EQI0]			SM_V10_7
0.504	0.0054407	0.008	0.00784928	0.108	0.1	Muscle 1	Smp_131400	Glucosidase 2 subunit beta	Source:UniProtKB/TrEMBL;Acc:A0A3Q0KLU8]	schistosoma_mansoni_prjea36577	Glucosidase 2 subunit beta [Source:UniProtKB/TrEMBL;Acc:A0A3Q0KLU8]			SM_V10_6
0.504	0.00101618	0.008	0.00146603	0.074	0.066	Muscle 1	Smp_131320	histone acetyltransferase	Source:UniProtKB/TrEMBL;Acc:A0A3Q0KLX0]	schistosoma_mansoni_prjea36577	histone acetyltransferase [Source:UniProtKB/TrEMBL;Acc:A0A3Q0KLX0]			SM_V10_6
0.504	0.00892674	0.008	0.0128786	0.047	0.039	Muscle 1	Smp_213260	N-alpha-acetyltransferase 60	Source:UniProtKB/TrEMBL;Acc:A0A5K4F272]	schistosoma_mansoni_prjea36577	N-alpha-acetyltransferase 60 [Source:UniProtKB/TrEMBL;Acc:A0A5K4F272]			SM_V10_6
0.504	0.00507898	0.008	0.00732742	0.113	0.104	Muscle 1	Smp_149480	Leucine-rich repeat-containing protein 57	Source:UniProtKB/TrEMBL;Acc:A0A3Q0KPM4]	schistosoma_mansoni_prjea36577	Leucine-rich repeat-containing protein 57 [Source:UniProtKB/TrEMBL;Acc:A0A3Q0KPM4]			SM_V10_6
0.504	0.00463516	0.008	0.00668713	0.048	0.041	Muscle 1	Smp_169960	Putative dual specificity protein phosphatase	Source:UniProtKB/TrEMBL;Acc:A0A3Q0KSP9]	schistosoma_mansoni_prjea36577	Putative dual specificity protein phosphatase [Source:UniProtKB/TrEMBL;Acc:A0A3Q0KSP9]			SM_V10_6
0.504	0.0159054	0.008	0.0229466	0.079	0.071	Muscle 1	Smp_207070	Uridine kinase	Source:UniProtKB/TrEMBL;Acc:G4VLZ9]	schistosoma_mansoni_prjea36577	Uridine kinase [Source:UniProtKB/TrEMBL;Acc:G4VLZ9]			SM_V10_6
0.504	0.00180902	0.008	0.00260987	0.134	0.125	Muscle 1	Smp_123290	cGMP-dependent protein kinase	Source:UniProtKB/TrEMBL;Acc:E7BBH9]	schistosoma_mansoni_prjea36577	cGMP-dependent protein kinase [Source:UniProtKB/TrEMBL;Acc:E7BBH9]	cGK1	UniProtKB Gene Name	SM_V10_6
0.504	0.00848906	0.008	0.0122471	0.021	0.013	Muscle 1	Smp_175310	Cyclin-dependent serine/threonine-protein kinase DDB_G0292550	Source:UniProtKB/TrEMBL;Acc:A0A3Q0KTD4]	schistosoma_mansoni_prjea36577	Cyclin-dependent serine/threonine-protein kinase DDB_G0292550 [Source:UniProtKB/TrEMBL;Acc:A0A3Q0KTD4]			SM_V10_6
0.504	0.00865327	0.008	0.012484	0.016	0.007	Muscle 1	Smp_315000	MARVEL domain-containing protein	Source:UniProtKB/TrEMBL;Acc:A0A5K4F7B0]	schistosoma_mansoni_prjea36577	MARVEL domain-containing protein [Source:UniProtKB/TrEMBL;Acc:A0A5K4F7B0]			SM_V10_5
0.504	0.00431026	0.008	0.00621839	0.054	0.046	Muscle 1	Smp_061480	Putative ubiquitin-protein ligase BRE1	Source:UniProtKB/TrEMBL;Acc:A0A3Q0KGN9]	schistosoma_mansoni_prjea36577	Putative ubiquitin-protein ligase BRE1 [Source:UniProtKB/TrEMBL;Acc:A0A3Q0KGN9]			SM_V10_5
0.504	0.00940012	0.008	0.0135615	0.01	0.002	Muscle 1	Smp_146710	C2H2-type domain-containing protein	Source:UniProtKB/TrEMBL;Acc:A0A3Q0KP90]	schistosoma_mansoni_prjea36577	C2H2-type domain-containing protein [Source:UniProtKB/TrEMBL;Acc:A0A3Q0KP90]			SM_V10_5
0.504	0.00780884	0.008	0.0112658	0.009	0.002	Muscle 1	Smp_058080	Putative g-protein coupled receptor	Source:UniProtKB/TrEMBL;Acc:A0A3Q0KGC7]	schistosoma_mansoni_prjea36577	Putative g-protein coupled receptor [Source:UniProtKB/TrEMBL;Acc:A0A3Q0KGC7]			SM_V10_5
0.504	0.00851671	0.008	0.012287	0.016	0.008	Muscle 1	Smp_212780	Tubulin polymerization-promoting protein	Source:UniProtKB/TrEMBL;Acc:A0A3Q0KVG0]	schistosoma_mansoni_prjea36577	Tubulin polymerization-promoting protein [Source:UniProtKB/TrEMBL;Acc:A0A3Q0KVG0]			SM_V10_5
0.504	0.00776084	0.008	0.0111965	0.022	0.015	Muscle 1	Smp_317150	Dyp-type peroxidase	Source:UniProtKB/TrEMBL;Acc:A0A5K4F6L3]	schistosoma_mansoni_prjea36577	Dyp-type peroxidase [Source:UniProtKB/TrEMBL;Acc:A0A5K4F6L3]			SM_V10_5
0.504	0.00854234	0.008	0.012324	0.016	0.007	Muscle 1	Smp_150990	Putative cationic amino acid transporter	Source:UniProtKB/TrEMBL;Acc:A0A5K4ET74]	schistosoma_mansoni_prjea36577	Putative cationic amino acid transporter [Source:UniProtKB/TrEMBL;Acc:A0A5K4ET74]			SM_V10_4
0.504	0.00867292	0.008	0.0125124	0.035	0.027	Muscle 1	Smp_350200	Smp_350200	Smp_350200~	schistosoma_mansoni_prjea36577				SM_V10_4
0.504	0.00122689	0.008	0.00177003	0.062	0.053	Muscle 1	Smp_247310	Protein vav	Source:UniProtKB/TrEMBL;Acc:A0A5K4F126]	schistosoma_mansoni_prjea36577	Protein vav [Source:UniProtKB/TrEMBL;Acc:A0A5K4F126]			SM_V10_4
0.504	0.00864506	0.008	0.0124722	0.038	0.029	Muscle 1	Smp_180790	Nodulin-like domain-containing protein	Source:UniProtKB/TrEMBL;Acc:A0A3Q0KTX9]	schistosoma_mansoni_prjea36577	Nodulin-like domain-containing protein [Source:UniProtKB/TrEMBL;Acc:A0A3Q0KTX9]			SM_V10_4
0.504	0.00882622	0.008	0.0127335	0.048	0.039	Muscle 1	Smp_334340	protein adenylyltransferase	Source:UniProtKB/TrEMBL;Acc:A0A5K4F5M5]	schistosoma_mansoni_prjea36577	protein adenylyltransferase [Source:UniProtKB/TrEMBL;Acc:A0A5K4F5M5]			SM_V10_4
0.504	0.0112591	0.008	0.0162434	0.081	0.074	Muscle 1	Smp_247630	ARMC6-like protein	Source:UniProtKB/TrEMBL;Acc:A0A5K4F2W4]	schistosoma_mansoni_prjea36577	ARMC6-like protein [Source:UniProtKB/TrEMBL;Acc:A0A5K4F2W4]			SM_V10_4
0.504	0.00760948	0.008	0.0109782	0.066	0.058	Muscle 1	Smp_042790	Dolichol-phosphate mannosyltransferase subunit 1	Source:UniProtKB/TrEMBL;Acc:G4VIT8]	schistosoma_mansoni_prjea36577	Dolichol-phosphate mannosyltransferase subunit 1 [Source:UniProtKB/TrEMBL;Acc:G4VIT8]	DPM	UniProtKB Gene Name	SM_V10_4
0.504	0.012718	0.008	0.0183482	0.101	0.092	Muscle 1	Smp_042550	Sortingnexin-related	Source:UniProtKB/TrEMBL;Acc:A0A5K4EDT8]	schistosoma_mansoni_prjea36577	Sortingnexin-related [Source:UniProtKB/TrEMBL;Acc:A0A5K4EDT8]			SM_V10_4
0.504	0.00904242	0.008	0.0130455	0.05	0.041	Muscle 1	Smp_135510	NAALADASE L peptidase (M28 family)	Source:UniProtKB/TrEMBL;Acc:A0A5K4ENR6]	schistosoma_mansoni_prjea36577	NAALADASE L peptidase (M28 family) [Source:UniProtKB/TrEMBL;Acc:A0A5K4ENR6]			SM_V10_4
0.504	0.00728362	0.008	0.010508	0.031	0.023	Muscle 1	Smp_346530	Cell differentiation protein RQCD1 homolog	Source:UniProtKB/TrEMBL;Acc:A0A5K4FF86]	schistosoma_mansoni_prjea36577	Cell differentiation protein RQCD1 homolog [Source:UniProtKB/TrEMBL;Acc:A0A5K4FF86]			SM_V10_4
0.504	0.00831655	0.008	0.0119982	0.045	0.038	Muscle 1	Smp_137040	HECT-type E3 ubiquitin transferase	Source:UniProtKB/TrEMBL;Acc:A0A3Q0KMS4]	schistosoma_mansoni_prjea36577	HECT-type E3 ubiquitin transferase [Source:UniProtKB/TrEMBL;Acc:A0A3Q0KMS4]			SM_V10_4
0.504	0.00012413	0.008	0.00017908	0.108	0.098	Muscle 1	Smp_102340	Adenylate cyclase type IX, putative	Source:UniProtKB/TrEMBL;Acc:A0A3Q0KJS6]	schistosoma_mansoni_prjea36577	Adenylate cyclase type IX, putative [Source:UniProtKB/TrEMBL;Acc:A0A3Q0KJS6]			SM_V10_4
0.504	0.00038735	0.008	0.00055883	0.049	0.042	Muscle 1	Smp_100080	Tetraspanin	Source:UniProtKB/TrEMBL;Acc:G4VG77]	schistosoma_mansoni_prjea36577	Tetraspanin [Source:UniProtKB/TrEMBL;Acc:G4VG77]			SM_V10_3
0.504	0.00806757	0.008	0.011639	0.017	0.009	Muscle 1	Smp_197640	Voltage-dependent calcium channel	Source:UniProtKB/TrEMBL;Acc:A0A3Q0KUE9]	schistosoma_mansoni_prjea36577	Voltage-dependent calcium channel [Source:UniProtKB/TrEMBL;Acc:A0A3Q0KUE9]			SM_V10_3
0.504	0.00840322	0.008	0.0121233	0.009	0.002	Muscle 1	Smp_134870	Putative early growth response protein	Source:UniProtKB/TrEMBL;Acc:G4VFS3]	schistosoma_mansoni_prjea36577	Putative early growth response protein [Source:UniProtKB/TrEMBL;Acc:G4VFS3]			SM_V10_3
0.504	0.00732244	0.008	0.010564	0.035	0.027	Muscle 1	Smp_040720	Glycerophosphocholine acyltransferase 1	Source:UniProtKB/TrEMBL;Acc:A0A3Q0KEU7]	schistosoma_mansoni_prjea36577	Glycerophosphocholine acyltransferase 1 [Source:UniProtKB/TrEMBL;Acc:A0A3Q0KEU7]			SM_V10_3
0.504	0.0123758	0.008	0.0178545	0.283	0.277	Muscle 1	Smp_000370	Selenoprotein K	Source:UniProtKB/TrEMBL;Acc:A0A3Q0KBB4]	schistosoma_mansoni_prjea36577	Selenoprotein K [Source:UniProtKB/TrEMBL;Acc:A0A3Q0KBB4]			SM_V10_3
0.504	0.00868469	0.008	0.0125294	0.029	0.021	Muscle 1	Smp_000680	Ornithine transporter 2 (Solute carrier family 25 member 2)	Source:UniProtKB/TrEMBL;Acc:G4LYG3]	schistosoma_mansoni_prjea36577	Ornithine transporter 2 (Solute carrier family 25 member 2) [Source:UniProtKB/TrEMBL;Acc:G4LYG3]			SM_V10_3
0.504	0.00691121	0.008	0.00997077	0.01	0.003	Muscle 1	Smp_159860	G-protein coupled receptor,putative	Source:UniProtKB/TrEMBL;Acc:A0A3Q0KR83]	schistosoma_mansoni_prjea36577	G-protein coupled receptor,putative [Source:UniProtKB/TrEMBL;Acc:A0A3Q0KR83]			SM_V10_3
0.504	0.00754932	0.008	0.0108914	0.057	0.049	Muscle 1	Smp_316460	E3 ubiquitin-protein ligase	Source:UniProtKB/TrEMBL;Acc:A0A5K4F7R9]	schistosoma_mansoni_prjea36577	E3 ubiquitin-protein ligase [Source:UniProtKB/TrEMBL;Acc:A0A5K4F7R9]			SM_V10_3
0.504	0.00933949	0.008	0.013474	0.045	0.038	Muscle 1	Smp_084520	SRR1 domain-containing protein	Source:UniProtKB/TrEMBL;Acc:A0A3Q0KIL3]	schistosoma_mansoni_prjea36577	SRR1 domain-containing protein [Source:UniProtKB/TrEMBL;Acc:A0A3Q0KIL3]			SM_V10_3
0.504	0.0203327	0.008	0.0293339	0.194	0.189	Muscle 1	Smp_246530	RING-type domain-containing protein	Source:UniProtKB/TrEMBL;Acc:A0A5K4F269]	schistosoma_mansoni_prjea36577	RING-type domain-containing protein [Source:UniProtKB/TrEMBL;Acc:A0A5K4F269]			SM_V10_3
0.504	0.0080026	0.008	0.0115453	0.041	0.032	Muscle 1	Smp_145980	Amino acid transporter	Source:UniProtKB/TrEMBL;Acc:A0A5K4ERB3]	schistosoma_mansoni_prjea36577	Amino acid transporter [Source:UniProtKB/TrEMBL;Acc:A0A5K4ERB3]			SM_V10_3
0.504	0.0110111	0.008	0.0158856	0.074	0.065	Muscle 1	Smp_346320	Chromo domain-containing protein	Source:UniProtKB/TrEMBL;Acc:A0A5K4FF55]	schistosoma_mansoni_prjea36577	Chromo domain-containing protein [Source:UniProtKB/TrEMBL;Acc:A0A5K4FF55]			SM_V10_3
0.504	0.00677617	0.008	0.00977595	0.058	0.05	Muscle 1	Smp_132450	Ankyrin repeat and fyve domain containing,putative	Source:UniProtKB/TrEMBL;Acc:A0A3Q0KLX9]	schistosoma_mansoni_prjea36577	Ankyrin repeat and fyve domain containing,putative [Source:UniProtKB/TrEMBL;Acc:A0A3Q0KLX9]			SM_V10_3
0.504	0.00607045	0.008	0.0087578	0.035	0.028	Muscle 1	Smp_162080	BHLH domain-containing protein	Source:UniProtKB/TrEMBL;Acc:A0A3Q0KRH3]	schistosoma_mansoni_prjea36577	BHLH domain-containing protein [Source:UniProtKB/TrEMBL;Acc:A0A3Q0KRH3]			SM_V10_3
0.504	0.00830934	0.008	0.0119878	0.012	0.004	Muscle 1	Smp_333520	Cadherin	Source:UniProtKB/TrEMBL;Acc:A0A5K4F8L1]	schistosoma_mansoni_prjea36577	Cadherin [Source:UniProtKB/TrEMBL;Acc:A0A5K4F8L1]			SM_V10_3
0.504	0.0080056	0.008	0.0115496	0.021	0.013	Muscle 1	Smp_083480	Ig-like domain-containing protein	Source:UniProtKB/TrEMBL;Acc:A0A5K4EID0]	schistosoma_mansoni_prjea36577	Ig-like domain-containing protein [Source:UniProtKB/TrEMBL;Acc:A0A5K4EID0]			SM_V10_3
0.504	0.00806072	0.008	0.0116292	0.022	0.013	Muscle 1	Smp_349420	Smp_349420	Smp_349420~	schistosoma_mansoni_prjea36577				SM_V10_3
0.504	0.0131287	0.008	0.0189407	0.142	0.134	Muscle 1	Smp_341470	PA domain-containing protein	Source:UniProtKB/TrEMBL;Acc:A0A5K4FED9]	schistosoma_mansoni_prjea36577	PA domain-containing protein [Source:UniProtKB/TrEMBL;Acc:A0A5K4FED9]			SM_V10_2
0.504	0.00798824	0.008	0.0115246	0.012	0.004	Muscle 1	Smp_176820	G_PROTEIN_RECEP_F2_4 domain-containing protein	Source:UniProtKB/TrEMBL;Acc:A0A3Q0KTI4]	schistosoma_mansoni_prjea36577	G_PROTEIN_RECEP_F2_4 domain-containing protein [Source:UniProtKB/TrEMBL;Acc:A0A3Q0KTI4]			SM_V10_2
0.504	0.00779946	0.008	0.0112522	0.045	0.037	Muscle 1	Smp_210340	Putative chromatin regulatory protein sir2; Sirtuin 6; Sirtuin 6	Source:UniProtKB/TrEMBL;Acc:T1VXV7]	schistosoma_mansoni_prjea36577	Putative chromatin regulatory protein sir2; Sirtuin 6; Sirtuin 6 [Source:UniProtKB/TrEMBL;Acc:T1VXV7]	Sirt6	UniProtKB Gene Name	SM_V10_2
0.504	0.00996566	0.008	0.0143774	0.083	0.074	Muscle 1	Smp_123040	RING-type domain-containing protein	Source:UniProtKB/TrEMBL;Acc:G4VCI2]	schistosoma_mansoni_prjea36577	RING-type domain-containing protein [Source:UniProtKB/TrEMBL;Acc:G4VCI2]			SM_V10_2
0.504	0.0122834	0.008	0.0177212	0.054	0.045	Muscle 1	Smp_129630	tRNA pseudouridine synthase D, putative	Source:UniProtKB/TrEMBL;Acc:A0A5K4ELS2]	schistosoma_mansoni_prjea36577	tRNA pseudouridine synthase D, putative [Source:UniProtKB/TrEMBL;Acc:A0A5K4ELS2]			SM_V10_2
0.504	0.0129412	0.008	0.0186702	0.129	0.122	Muscle 1	Smp_014010	Adenylyl cyclase-associated protein	Source:UniProtKB/TrEMBL;Acc:G4LVI8]	schistosoma_mansoni_prjea36577	Adenylyl cyclase-associated protein [Source:UniProtKB/TrEMBL;Acc:G4LVI8]			SM_V10_2
0.504	0.00155717	0.008	0.00224653	0.036	0.028	Muscle 1	Smp_147260	Ras-like family	Source:UniProtKB/TrEMBL;Acc:A0A3Q0KPH8]	schistosoma_mansoni_prjea36577	Ras-like family [Source:UniProtKB/TrEMBL;Acc:A0A3Q0KPH8]			SM_V10_2
0.504	0.014645	0.008	0.0211283	0.126	0.119	Muscle 1	Smp_186560	39S ribosomal protein L18, mitochondrial	Source:UniProtKB/TrEMBL;Acc:A0A3Q0KU59]	schistosoma_mansoni_prjea36577	39S ribosomal protein L18, mitochondrial [Source:UniProtKB/TrEMBL;Acc:A0A3Q0KU59]			SM_V10_2
0.504	0.00725732	0.008	0.0104701	0.009	0.002	Muscle 1	Smp_310430	Cadherin	Source:UniProtKB/TrEMBL;Acc:A0A5K4F6M5]	schistosoma_mansoni_prjea36577	Cadherin [Source:UniProtKB/TrEMBL;Acc:A0A5K4F6M5]			SM_V10_2
0.504	0.0113986	0.008	0.0164447	0.115	0.107	Muscle 1	Smp_196150	Selenoprotein O	Source:UniProtKB/TrEMBL;Acc:A0A3Q0KUB4]	schistosoma_mansoni_prjea36577	Selenoprotein O [Source:UniProtKB/TrEMBL;Acc:A0A3Q0KUB4]			SM_V10_2
0.504	0.00795746	0.008	0.0114802	0.011	0.003	Muscle 1	Smp_340270	CUB domain-containing protein	Source:UniProtKB/TrEMBL;Acc:A0A5K4FDY0]	schistosoma_mansoni_prjea36577	CUB domain-containing protein [Source:UniProtKB/TrEMBL;Acc:A0A5K4FDY0]			SM_V10_2
0.504	0.0119	0.008	0.0171681	0.069	0.062	Muscle 1	Smp_303430	Smp_303430	Smp_303430~	schistosoma_mansoni_prjea36577				SM_V10_2
0.504	0.00793757	0.008	0.0114515	0.032	0.023	Muscle 1	Smp_163080	Diacylglycerol kinase	Source:UniProtKB/TrEMBL;Acc:A0A3Q0KRN9]	schistosoma_mansoni_prjea36577	Diacylglycerol kinase [Source:UniProtKB/TrEMBL;Acc:A0A3Q0KRN9]			SM_V10_1
0.504	0.00910133	0.008	0.0131305	0.012	0.003	Muscle 1	Smp_170620	G_PROTEIN_RECEP_F1_2 domain-containing protein	Source:UniProtKB/TrEMBL;Acc:G4VAR9]	schistosoma_mansoni_prjea36577	G_PROTEIN_RECEP_F1_2 domain-containing protein [Source:UniProtKB/TrEMBL;Acc:G4VAR9]			SM_V10_1
0.504	0.0110501	0.008	0.015942	0.087	0.078	Muscle 1	Smp_341040	HSCB_C domain-containing protein	Source:UniProtKB/TrEMBL;Acc:A0A5K4FC08]	schistosoma_mansoni_prjea36577	HSCB_C domain-containing protein [Source:UniProtKB/TrEMBL;Acc:A0A5K4FC08]			SM_V10_1
0.504	0.0087444	0.008	0.0126155	0.047	0.037	Muscle 1	Smp_181170	Putative nuclear lim interactor-interacting factor (Nli-interacting factor) (Nli-if)	Source:UniProtKB/TrEMBL;Acc:A0A3Q0KU23]	schistosoma_mansoni_prjea36577	Putative nuclear lim interactor-interacting factor (Nli-interacting factor) (Nli-if) [Source:UniProtKB/TrEMBL;Acc:A0A3Q0KU23]			SM_V10_1
0.504	0.00707794	0.008	0.0102113	0.017	0.01	Muscle 1	Smp_161360	Putative syndecan	Source:UniProtKB/TrEMBL;Acc:A0A3Q0KRD9]	schistosoma_mansoni_prjea36577	Putative syndecan [Source:UniProtKB/TrEMBL;Acc:A0A3Q0KRD9]			SM_V10_1
0.504	0.0080466	0.008	0.0116088	0.032	0.023	Muscle 1	Smp_172050	Putative cyclin fold protein	Source:UniProtKB/TrEMBL;Acc:A0A3Q0KSV7]	schistosoma_mansoni_prjea36577	Putative cyclin fold protein [Source:UniProtKB/TrEMBL;Acc:A0A3Q0KSV7]			SM_V10_1
0.504	0.010057	0.008	0.0145092	0.04	0.032	Muscle 1	Smp_345780	SREBP regulating gene protein	Source:UniProtKB/TrEMBL;Acc:A0A5K4FDR3]	schistosoma_mansoni_prjea36577	SREBP regulating gene protein [Source:UniProtKB/TrEMBL;Acc:A0A5K4FDR3]			SM_V10_1
0.504	0.0115778	0.008	0.0167032	0.2	0.194	Muscle 1	Smp_334890	HORMA domain-containing protein	Source:UniProtKB/TrEMBL;Acc:A0A5K4FAN2]	schistosoma_mansoni_prjea36577	HORMA domain-containing protein [Source:UniProtKB/TrEMBL;Acc:A0A5K4FAN2]			SM_V10_1
0.504	0.00988208	0.008	0.0142568	0.064	0.056	Muscle 1	Smp_170350	Putative lung seven transmembrane receptor	Source:UniProtKB/TrEMBL;Acc:A0A3Q0KSQ0]	schistosoma_mansoni_prjea36577	Putative lung seven transmembrane receptor [Source:UniProtKB/TrEMBL;Acc:A0A3Q0KSQ0]			SM_V10_1
0.504	0.00863915	0.008	0.0124636	0.009	0.001	Muscle 1	Smp_332560	WD_REPEATS_REGION domain-containing protein	Source:UniProtKB/TrEMBL;Acc:A0A5K4F9S0]	schistosoma_mansoni_prjea36577	WD_REPEATS_REGION domain-containing protein [Source:UniProtKB/TrEMBL;Acc:A0A5K4F9S0]			SM_V10_1
0.504	0.00958659	0.008	0.0138305	0.045	0.038	Muscle 1	Smp_302090	Choline transporter-like protein	Source:UniProtKB/TrEMBL;Acc:A0A5K4F551]	schistosoma_mansoni_prjea36577	Choline transporter-like protein [Source:UniProtKB/TrEMBL;Acc:A0A5K4F551]			SM_V10_1
0.504	0.00465178	0.008	0.0067111	0.067	0.059	Muscle 1	Smp_028080	Serine palmitoyltransferase 1	Source:UniProtKB/TrEMBL;Acc:G4V628]	schistosoma_mansoni_prjea36577	Serine palmitoyltransferase 1 [Source:UniProtKB/TrEMBL;Acc:G4V628]			SM_V10_1
0.504	0.00470142	0.008	0.00678272	0.047	0.039	Muscle 1	Smp_319230	t-SNARE coiled-coil homology domain-containing protein	Source:UniProtKB/TrEMBL;Acc:A0A5K4F8H3]	schistosoma_mansoni_prjea36577	t-SNARE coiled-coil homology domain-containing protein [Source:UniProtKB/TrEMBL;Acc:A0A5K4F8H3]			SM_V10_1
0.504	0.00962189	0.008	0.0138815	0.07	0.062	Muscle 1	Smp_010250	Smp_010250	Source:UniProtKB/TrEMBL;Acc:G4LUH0]	schistosoma_mansoni_prjea36577	Smp_010250 [Source:UniProtKB/TrEMBL;Acc:G4LUH0]			SM_V10_1
0.504	0.00984668	0.008	0.0142058	0.137	0.128	Muscle 1	Smp_337140	Complex I-49kD	Source:UniProtKB/TrEMBL;Acc:A0A5K4FDI2]	schistosoma_mansoni_prjea36577	Complex I-49kD [Source:UniProtKB/TrEMBL;Acc:A0A5K4FDI2]			SM_V10_1
0.504	0.027742	0.008	0.0400232	0.379	0.386	Muscle 1	Smp_007380	STING ER exit protein	Source:UniProtKB/TrEMBL;Acc:A0A3Q0KC02]	schistosoma_mansoni_prjea36577	STING ER exit protein [Source:UniProtKB/TrEMBL;Acc:A0A3Q0KC02]			SM_V10_1
0.504	0.0133778	0.008	0.0193	0.147	0.141	Muscle 1	Smp_196620	GP-PDE domain-containing protein	Source:UniProtKB/TrEMBL;Acc:A0A3Q0KUI0]	schistosoma_mansoni_prjea36577	GP-PDE domain-containing protein [Source:UniProtKB/TrEMBL;Acc:A0A3Q0KUI0]			SM_V10_1
0.504	0.00567527	0.008	0.00818768	0.018	0.011	Muscle 1	Smp_315700	Spindle and centriole-associated protein 1	Source:UniProtKB/TrEMBL;Acc:A0A5K4F636]	schistosoma_mansoni_prjea36577	Spindle and centriole-associated protein 1 [Source:UniProtKB/TrEMBL;Acc:A0A5K4F636]			SM_V10_1
0.504	0.00624442	0.008	0.0090088	0.061	0.053	Muscle 1	Smp_140400	MRG domain-containing protein	Source:UniProtKB/TrEMBL;Acc:A0A3Q0KN63]	schistosoma_mansoni_prjea36577	MRG domain-containing protein [Source:UniProtKB/TrEMBL;Acc:A0A3Q0KN63]			SM_V10_1
0.504	0.00962422	0.008	0.0138848	0.08	0.072	Muscle 1	Smp_006680	Smp_006680	Smp_006680~	schistosoma_mansoni_prjea36577				SM_V10_1
0.504	0.00782772	0.008	0.011293	0.014	0.007	Muscle 1	Smp_161800	Tubulin tyrosine ligase-related	Source:UniProtKB/TrEMBL;Acc:A0A3Q0KRB5]	schistosoma_mansoni_prjea36577	Tubulin tyrosine ligase-related [Source:UniProtKB/TrEMBL;Acc:A0A3Q0KRB5]			SM_V10_1
0.504	0.00588025	0.008	0.0084834	0.07	0.062	Muscle 1	Smp_133020	mitogen-activated protein kinase	Source:UniProtKB/TrEMBL;Acc:A0A3Q0KM47]	schistosoma_mansoni_prjea36577	mitogen-activated protein kinase [Source:UniProtKB/TrEMBL;Acc:A0A3Q0KM47]			SM_V10_1
0.504	0.0115472	0.008	0.0166591	0.142	0.135	Muscle 1	Smp_246020	39S ribosomal protein L39, mitochondrial	Source:UniProtKB/TrEMBL;Acc:A0A5K4F105]	schistosoma_mansoni_prjea36577	39S ribosomal protein L39, mitochondrial [Source:UniProtKB/TrEMBL;Acc:A0A5K4F105]			SM_V10_1
0.504	0.00768508	0.008	0.0110872	0.01	0.003	Muscle 1	Smp_163520	RNA polymerase II nuclear localization protein SLC7A6OS	Source:UniProtKB/TrEMBL;Acc:G4LXE1]	schistosoma_mansoni_prjea36577	RNA polymerase II nuclear localization protein SLC7A6OS [Source:UniProtKB/TrEMBL;Acc:G4LXE1]			SM_V10_1
0.504	0.00859919	0.008	0.012406	0.057	0.049	Muscle 1	Smp_165400	Propionyl-CoA carboxylase alpha chain, mitochondrial	Source:UniProtKB/TrEMBL;Acc:A0A3Q0KRZ6]	schistosoma_mansoni_prjea36577	Propionyl-CoA carboxylase alpha chain, mitochondrial [Source:UniProtKB/TrEMBL;Acc:A0A3Q0KRZ6]			SM_V10_1
0.504	0.0148832	0.008	0.0214719	0.167	0.16	Muscle 1	Smp_073690	Mitochondrial ribosomal protein S34	Source:UniProtKB/TrEMBL;Acc:G4V700]	schistosoma_mansoni_prjea36577	Mitochondrial ribosomal protein S34 [Source:UniProtKB/TrEMBL;Acc:G4V700]			SM_V10_1
0.504	0.00814884	0.008	0.0117563	0.012	0.004	Muscle 1	Smp_245815	Smp_245815	Smp_245815~	schistosoma_mansoni_prjea36577				SM_V10_1
0.504	0.0211146	0.008	0.030462	0.137	0.129	Muscle 1	Smp_003130	Putative udp-glucose pyrophosphatase	Source:UniProtKB/TrEMBL;Acc:A0A3Q0KBL5]	schistosoma_mansoni_prjea36577	Putative udp-glucose pyrophosphatase [Source:UniProtKB/TrEMBL;Acc:A0A3Q0KBL5]			SM_V10_1
0.504	0.00701408	0.008	0.0101192	0.027	0.02	Muscle 1	Smp_123820	Putative serine-rich repeat protein 2	Source:UniProtKB/TrEMBL;Acc:A0A3Q0KKJ7]	schistosoma_mansoni_prjea36577	Putative serine-rich repeat protein 2 [Source:UniProtKB/TrEMBL;Acc:A0A3Q0KKJ7]			SM_V10_1
0.504	0.00192752	0.008	0.00278082	0.061	0.052	Muscle 1	Smp_340100	SANT domain-containing protein	Source:UniProtKB/TrEMBL;Acc:A0A5K4FA35]	schistosoma_mansoni_prjea36577	SANT domain-containing protein [Source:UniProtKB/TrEMBL;Acc:A0A5K4FA35]			SM_V10_1
0.504	0.00959408	0.008	0.0138413	0.045	0.037	Muscle 1	Smp_342030	Glutathione peroxidase	Source:UniProtKB/TrEMBL;Acc:A0A5K4FEI9]	schistosoma_mansoni_prjea36577	Glutathione peroxidase [Source:UniProtKB/TrEMBL;Acc:A0A5K4FEI9]			SM_V10_1
0.504	0.00990134	0.008	0.0142846	0.119	0.111	Muscle 1	Smp_056200	Isocitrate dehydrogenase	NAD] subunit, mitochondrial	schistosoma_mansoni_prjea36577	Isocitrate dehydrogenase [NAD] subunit, mitochondrial [Source:UniProtKB/TrEMBL;Acc:G4V5Y0]			SM_V10_1
0.504	0.00777369	0.008	0.0112151	0.029	0.02	Muscle 1	Smp_152180	Putative fad NAD binding oxidoreductases	Source:UniProtKB/TrEMBL;Acc:A0A3Q0KPW0]	schistosoma_mansoni_prjea36577	Putative fad NAD binding oxidoreductases [Source:UniProtKB/TrEMBL;Acc:A0A3Q0KPW0]			SM_V10_1
0.504	0.00961384	0.008	0.0138698	0.045	0.037	Muscle 1	Smp_345330	RING-type domain-containing protein	Source:UniProtKB/TrEMBL;Acc:A0A5K4FC48]	schistosoma_mansoni_prjea36577	RING-type domain-containing protein [Source:UniProtKB/TrEMBL;Acc:A0A5K4FC48]			SM_V10_1
0.504	0.00428938	0.008	0.00618827	0.048	0.04	Muscle 1	Smp_319340	Conserved oligomeric Golgi complex subunit 4	Source:UniProtKB/TrEMBL;Acc:A0A5K4F558]	schistosoma_mansoni_prjea36577	Conserved oligomeric Golgi complex subunit 4 [Source:UniProtKB/TrEMBL;Acc:A0A5K4F558]			SM_V10_1
0.496	0.00442824	0.008	0.0063886	0.144	0.155	Muscle 1	Smp_340520	Protein FAM98B	Source:UniProtKB/TrEMBL;Acc:A0A5K4FCR4]	schistosoma_mansoni_prjea36577	Protein FAM98B [Source:UniProtKB/TrEMBL;Acc:A0A5K4FCR4]			SM_V10_Z
0.496	0.00276296	0.008	0.0039861	0.183	0.195	Muscle 1	Smp_026630	26S proteasome non-ATPase regulatory subunit 7 (M67 family)	Source:UniProtKB/TrEMBL;Acc:A0A3Q0KDL7]	schistosoma_mansoni_prjea36577	26S proteasome non-ATPase regulatory subunit 7 (M67 family) [Source:UniProtKB/TrEMBL;Acc:A0A3Q0KDL7]			SM_V10_Z
0.496	0.00651436	0.008	0.00939824	0.297	0.312	Muscle 1	Smp_009390	Putative prefoldin subunit	Source:UniProtKB/TrEMBL;Acc:G4VL14]	schistosoma_mansoni_prjea36577	Putative prefoldin subunit [Source:UniProtKB/TrEMBL;Acc:G4VL14]			SM_V10_6
0.496	0.00256904	0.008	0.00370634	0.173	0.184	Muscle 1	Smp_158380	Mitochondrial import inner membrane translocase subunit TIM44	Source:UniProtKB/TrEMBL;Acc:A0A3Q0KQU6]	schistosoma_mansoni_prjea36577	Mitochondrial import inner membrane translocase subunit TIM44 [Source:UniProtKB/TrEMBL;Acc:A0A3Q0KQU6]			SM_V10_4
0.496	0.00143553	0.008	0.00207103	0.282	0.295	Muscle 1	Smp_326520	Ovule protein	Source:UniProtKB/TrEMBL;Acc:A0A5K4F8R7]	schistosoma_mansoni_prjea36577	Ovule protein [Source:UniProtKB/TrEMBL;Acc:A0A5K4F8R7]			SM_V10_3
0.496	0.00563215	0.008	0.00812548	0.221	0.231	Muscle 1	Smp_030260	HIG1 domain-containing protein	Source:UniProtKB/TrEMBL;Acc:G4VFN2]	schistosoma_mansoni_prjea36577	HIG1 domain-containing protein [Source:UniProtKB/TrEMBL;Acc:G4VFN2]			SM_V10_3
0.496	0.00479689	0.008	0.00692045	0.287	0.302	Muscle 1	Smp_008430	SHSP domain-containing protein	Source:UniProtKB/TrEMBL;Acc:G4V5H1]	schistosoma_mansoni_prjea36577	SHSP domain-containing protein [Source:UniProtKB/TrEMBL;Acc:G4V5H1]			SM_V10_1
0.503	0.00673446	0.006	0.00971577	0.007	0	Muscle 1	Smp_155310	Tetraspanin	Source:UniProtKB/TrEMBL;Acc:G4LUN6]	schistosoma_mansoni_prjea36577	Tetraspanin [Source:UniProtKB/TrEMBL;Acc:G4LUN6]			SM_V10_1
0.503	0.0068548	0.006	0.00988938	0.036	0.031	Muscle 1	Smp_345440	Hemicentin-1	Source:UniProtKB/TrEMBL;Acc:A0A5K4FDL1]	schistosoma_mansoni_prjea36577	Hemicentin-1 [Source:UniProtKB/TrEMBL;Acc:A0A5K4FDL1]			SM_V10_Z
0.503	0.00318626	0.006	0.0045968	0.102	0.097	Muscle 1	Smp_061310	DUF2012 domain-containing protein	Source:UniProtKB/TrEMBL;Acc:A0A3Q0KGP0]	schistosoma_mansoni_prjea36577	DUF2012 domain-containing protein [Source:UniProtKB/TrEMBL;Acc:A0A3Q0KGP0]			SM_V10_Z
0.503	0.00569115	0.006	0.0082106	0.018	0.012	Muscle 1	Smp_204010	Smp_204010	Smp_204010~	schistosoma_mansoni_prjea36577				SM_V10_Z
0.503	0.00594857	0.006	0.00858198	0.01	0.004	Muscle 1	Smp_204020	G_PROTEIN_RECEP_F1_2 domain-containing protein	Source:UniProtKB/TrEMBL;Acc:G4VSV3]	schistosoma_mansoni_prjea36577	G_PROTEIN_RECEP_F1_2 domain-containing protein [Source:UniProtKB/TrEMBL;Acc:G4VSV3]			SM_V10_Z
0.503	0.00247775	0.006	0.00357463	0.05	0.045	Muscle 1	Smp_178490	Solute carrier family 35 member d1, putative	Source:UniProtKB/TrEMBL;Acc:A0A3Q0KTR4]	schistosoma_mansoni_prjea36577	Solute carrier family 35 member d1, putative [Source:UniProtKB/TrEMBL;Acc:A0A3Q0KTR4]			SM_V10_Z
0.503	0.00650283	0.006	0.00938161	0.037	0.031	Muscle 1	Smp_170170	WD repeat-containing protein 47	Source:UniProtKB/TrEMBL;Acc:A0A3Q0KSQ9]	schistosoma_mansoni_prjea36577	WD repeat-containing protein 47 [Source:UniProtKB/TrEMBL;Acc:A0A3Q0KSQ9]			SM_V10_Z
0.503	0.00892274	0.006	0.0128728	0.583	0.586	Muscle 1	Smp_331810	Prefoldin subunit 4	Source:UniProtKB/TrEMBL;Acc:A0A5K4F547]	schistosoma_mansoni_prjea36577	Prefoldin subunit 4 [Source:UniProtKB/TrEMBL;Acc:A0A5K4F547]			SM_V10_Z
0.503	0.00792903	0.006	0.0114392	0.069	0.063	Muscle 1	Smp_340450	Transcriptional repressor protein YY1	Source:UniProtKB/TrEMBL;Acc:A0A5K4FE05]	schistosoma_mansoni_prjea36577	Transcriptional repressor protein YY1 [Source:UniProtKB/TrEMBL;Acc:A0A5K4FE05]			SM_V10_Z
0.503	0.0060261	0.006	0.00869382	0.049	0.043	Muscle 1	Smp_153480	Putative cation chloride cotransporter	Source:UniProtKB/TrEMBL;Acc:A0A5K4ESU4]	schistosoma_mansoni_prjea36577	Putative cation chloride cotransporter [Source:UniProtKB/TrEMBL;Acc:A0A5K4ESU4]			SM_V10_Z
0.503	0.00464162	0.006	0.00669644	0.014	0.008	Muscle 1	Smp_307260	Protein kinase domain-containing protein	Source:UniProtKB/TrEMBL;Acc:A0A5K4F4L4]	schistosoma_mansoni_prjea36577	Protein kinase domain-containing protein [Source:UniProtKB/TrEMBL;Acc:A0A5K4F4L4]			SM_V10_Z
0.503	0.00662138	0.006	0.00955264	0.01	0.004	Muscle 1	Smp_242500	Coiled-coil domain-containing protein 102A	Source:UniProtKB/TrEMBL;Acc:G4VNI6]	schistosoma_mansoni_prjea36577	Coiled-coil domain-containing protein 102A [Source:UniProtKB/TrEMBL;Acc:G4VNI6]			SM_V10_Z
0.503	0.0220509	0.006	0.0318127	0.547	0.563	Muscle 1	Smp_103460	Eukaryotictranslation initiation factor,putative	Source:UniProtKB/TrEMBL;Acc:C4QPK4]	schistosoma_mansoni_prjea36577	Eukaryotictranslation initiation factor,putative [Source:UniProtKB/TrEMBL;Acc:C4QPK4]			SM_V10_Z
0.503	0.00605344	0.006	0.00873327	0.008	0.002	Muscle 1	Smp_244750	Cation-transporting ATPase	Source:UniProtKB/TrEMBL;Acc:A0A5K4F0A3]	schistosoma_mansoni_prjea36577	Cation-transporting ATPase [Source:UniProtKB/TrEMBL;Acc:A0A5K4F0A3]			SM_V10_Z
0.503	0.00839207	0.006	0.0121072	0.106	0.101	Muscle 1	Smp_043500	RNase_Zc3h12a domain-containing protein	Source:UniProtKB/TrEMBL;Acc:A0A3Q0KF39]	schistosoma_mansoni_prjea36577	RNase_Zc3h12a domain-containing protein [Source:UniProtKB/TrEMBL;Acc:A0A3Q0KF39]			SM_V10_Z
0.503	0.00266198	0.006	0.00384043	0.052	0.045	Muscle 1	Smp_245000	Pre-mRNA-processing factor 6	Source:UniProtKB/TrEMBL;Acc:A0A5K4F1L5]	schistosoma_mansoni_prjea36577	Pre-mRNA-processing factor 6 [Source:UniProtKB/TrEMBL;Acc:A0A5K4F1L5]			SM_V10_Z
0.503	0.00988894	0.006	0.0142667	0.109	0.104	Muscle 1	Smp_172660	Diphosphomevalonate decarboxylase	Source:UniProtKB/TrEMBL;Acc:A0A3Q0KT25]	schistosoma_mansoni_prjea36577	Diphosphomevalonate decarboxylase [Source:UniProtKB/TrEMBL;Acc:A0A3Q0KT25]			SM_V10_Z
0.503	0.00490459	0.006	0.00707583	0.037	0.03	Muscle 1	Smp_346520	Macoilin	Source:UniProtKB/TrEMBL;Acc:A0A5K4FCK2]	schistosoma_mansoni_prjea36577	Macoilin [Source:UniProtKB/TrEMBL;Acc:A0A5K4FCK2]			SM_V10_Z
0.503	0.00662027	0.006	0.00955104	0.029	0.022	Muscle 1	Smp_053420	PH domain-containing protein	Source:UniProtKB/TrEMBL;Acc:G4VRK9]	schistosoma_mansoni_prjea36577	PH domain-containing protein [Source:UniProtKB/TrEMBL;Acc:G4VRK9]			SM_V10_Z
0.503	0.0041071	0.006	0.00592529	0.096	0.091	Muscle 1	Smp_174960	Putative merlin/moesin/ezrin/radixin	Source:UniProtKB/TrEMBL;Acc:A0A5K4EWI2]	schistosoma_mansoni_prjea36577	Putative merlin/moesin/ezrin/radixin [Source:UniProtKB/TrEMBL;Acc:A0A5K4EWI2]			SM_V10_Z
0.503	0.00502994	0.006	0.00725666	0.058	0.052	Muscle 1	Smp_347670	Macoilin	Source:UniProtKB/TrEMBL;Acc:A0A5K4FFP9]	schistosoma_mansoni_prjea36577	Macoilin [Source:UniProtKB/TrEMBL;Acc:A0A5K4FFP9]			SM_V10_Z
0.503	0.00660999	0.006	0.0095362	0.011	0.005	Muscle 1	Smp_153780	Putative glutamate receptor, kainate	Source:UniProtKB/TrEMBL;Acc:A0A3Q0KQ55]	schistosoma_mansoni_prjea36577	Putative glutamate receptor, kainate [Source:UniProtKB/TrEMBL;Acc:A0A3Q0KQ55]			SM_V10_Z
0.503	0.00682876	0.006	0.00985182	0.008	0.001	Muscle 1	Smp_022890	Rho-GAP domain-containing protein	Source:UniProtKB/TrEMBL;Acc:A0A5K4EB14]	schistosoma_mansoni_prjea36577	Rho-GAP domain-containing protein [Source:UniProtKB/TrEMBL;Acc:A0A5K4EB14]			SM_V10_Z
0.503	0.00435877	0.006	0.00628837	0.068	0.061	Muscle 1	Smp_126170	FYVE-type domain-containing protein	Source:UniProtKB/TrEMBL;Acc:A0A3Q0KKX5]	schistosoma_mansoni_prjea36577	FYVE-type domain-containing protein [Source:UniProtKB/TrEMBL;Acc:A0A3Q0KKX5]			SM_V10_Z
0.503	0.00897201	0.006	0.0129439	0.038	0.033	Muscle 1	Smp_139070	3bp-1 related rhogap	Source:UniProtKB/TrEMBL;Acc:A0A3Q0KN60]	schistosoma_mansoni_prjea36577	3bp-1 related rhogap [Source:UniProtKB/TrEMBL;Acc:A0A3Q0KN60]			SM_V10_Z
0.503	0.00543806	0.006	0.00784546	0.012	0.006	Muscle 1	Smp_174300	C2H2-type domain-containing protein	Source:UniProtKB/TrEMBL;Acc:A0A3Q0KTA6]	schistosoma_mansoni_prjea36577	C2H2-type domain-containing protein [Source:UniProtKB/TrEMBL;Acc:A0A3Q0KTA6]			SM_V10_Z
0.503	0.00368417	0.006	0.00531514	0.047	0.042	Muscle 1	Smp_180470	Cytoplasmic dynein intermediate chain 2, (Dhic-2), putative	Source:UniProtKB/TrEMBL;Acc:A0A5K4EZI4]	schistosoma_mansoni_prjea36577	Cytoplasmic dynein intermediate chain 2, (Dhic-2), putative [Source:UniProtKB/TrEMBL;Acc:A0A5K4EZI4]			SM_V10_Z
0.503	0.00596605	0.006	0.00860719	0.014	0.007	Muscle 1	Smp_015760	SOCS box domain-containing protein	Source:UniProtKB/TrEMBL;Acc:A0A3Q0KCP0]	schistosoma_mansoni_prjea36577	SOCS box domain-containing protein [Source:UniProtKB/TrEMBL;Acc:A0A3Q0KCP0]			SM_V10_Z
0.503	0.00559655	0.006	0.00807412	0.016	0.011	Muscle 1	Smp_301050	SOCS box domain-containing protein	Source:UniProtKB/TrEMBL;Acc:A0A5K4F4Z3]	schistosoma_mansoni_prjea36577	SOCS box domain-containing protein [Source:UniProtKB/TrEMBL;Acc:A0A5K4F4Z3]			SM_V10_7
0.503	0.00489569	0.006	0.00706298	0.05	0.044	Muscle 1	Smp_164270	Putative cell adhesion molecule	Source:UniProtKB/TrEMBL;Acc:A0A5K4EWD3]	schistosoma_mansoni_prjea36577	Putative cell adhesion molecule [Source:UniProtKB/TrEMBL;Acc:A0A5K4EWD3]			SM_V10_7
0.503	0.00263285	0.006	0.0037984	0.05	0.045	Muscle 1	Smp_005790	Putative gtp-binding protein (Q) alpha-11 subunit, gna11	Source:UniProtKB/TrEMBL;Acc:G4V734]	schistosoma_mansoni_prjea36577	Putative gtp-binding protein (Q) alpha-11 subunit, gna11 [Source:UniProtKB/TrEMBL;Acc:G4V734]			SM_V10_7
0.503	0.00596746	0.006	0.00860922	0.033	0.028	Muscle 1	Smp_125370	Serine/threonine kinase	Source:UniProtKB/TrEMBL;Acc:A0A3Q0KKX4]	schistosoma_mansoni_prjea36577	Serine/threonine kinase [Source:UniProtKB/TrEMBL;Acc:A0A3Q0KKX4]			SM_V10_7
0.503	0.00536462	0.006	0.00773951	0.119	0.112	Muscle 1	Smp_347310	Smp_347310	Smp_347310~	schistosoma_mansoni_prjea36577				SM_V10_7
0.503	0.0171093	0.006	0.0246835	0.3	0.299	Muscle 1	Smp_041390	Ubiquitin-conjugating enzyme E2 G, putative	Source:UniProtKB/TrEMBL;Acc:G4LWV8]	schistosoma_mansoni_prjea36577	Ubiquitin-conjugating enzyme E2 G, putative [Source:UniProtKB/TrEMBL;Acc:G4LWV8]			SM_V10_7
0.503	0.00455874	0.006	0.00657687	0.06	0.053	Muscle 1	Smp_140200	MADS-box domain-containing protein	Source:UniProtKB/TrEMBL;Acc:A0A5K4EPQ8]	schistosoma_mansoni_prjea36577	MADS-box domain-containing protein [Source:UniProtKB/TrEMBL;Acc:A0A5K4EPQ8]			SM_V10_7
0.503	0.00522637	0.006	0.00754006	0.011	0.006	Muscle 1	Smp_130370	Elongation of very long chain fatty acids protein	Source:UniProtKB/TrEMBL;Acc:A0A3Q0KLN9]	schistosoma_mansoni_prjea36577	Elongation of very long chain fatty acids protein [Source:UniProtKB/TrEMBL;Acc:A0A3Q0KLN9]			SM_V10_7
0.503	0.00561124	0.006	0.00809531	0.045	0.038	Muscle 1	Smp_063180	DUF862 domain-containing protein	Source:UniProtKB/TrEMBL;Acc:A0A3Q0KGT8]	schistosoma_mansoni_prjea36577	DUF862 domain-containing protein [Source:UniProtKB/TrEMBL;Acc:A0A3Q0KGT8]			SM_V10_6
0.503	0.00608584	0.006	0.00878001	0.054	0.047	Muscle 1	Smp_334770	Rho-GAP domain-containing protein	Source:UniProtKB/TrEMBL;Acc:A0A5K4FAM2]	schistosoma_mansoni_prjea36577	Rho-GAP domain-containing protein [Source:UniProtKB/TrEMBL;Acc:A0A5K4FAM2]			SM_V10_6
0.503	0.00485814	0.006	0.00700881	0.014	0.008	Muscle 1	Smp_156740	Putative ocrl type II inositol 5-phosphatase	Source:UniProtKB/TrEMBL;Acc:A0A5K4ESV2]	schistosoma_mansoni_prjea36577	Putative ocrl type II inositol 5-phosphatase [Source:UniProtKB/TrEMBL;Acc:A0A5K4ESV2]			SM_V10_6
0.503	0.00608251	0.006	0.0087752	0.04	0.033	Muscle 1	Smp_173060	Pak-interacting exchange factor, beta-pix/cool-1, putative	Source:UniProtKB/TrEMBL;Acc:A0A5K4EWY6]	schistosoma_mansoni_prjea36577	Pak-interacting exchange factor, beta-pix/cool-1, putative [Source:UniProtKB/TrEMBL;Acc:A0A5K4EWY6]			SM_V10_6
0.503	0.001114	0.006	0.00160716	0.056	0.051	Muscle 1	Smp_155560	Serpin, putative	Source:UniProtKB/TrEMBL;Acc:A0A3Q0KQJ9]	schistosoma_mansoni_prjea36577	Serpin, putative [Source:UniProtKB/TrEMBL;Acc:A0A3Q0KQJ9]			SM_V10_6
0.503	0.0044541	0.006	0.0064259	0.038	0.032	Muscle 1	Smp_070640	B41 domain-containing protein	Source:UniProtKB/TrEMBL;Acc:A0A3Q0KHF0]	schistosoma_mansoni_prjea36577	B41 domain-containing protein [Source:UniProtKB/TrEMBL;Acc:A0A3Q0KHF0]			SM_V10_5
0.503	0.00443578	0.006	0.00639948	0.033	0.027	Muscle 1	Smp_070610	Mps one binder kinase activator-like 1 (Mob1 homolog 1) (Mob1)	Source:UniProtKB/TrEMBL;Acc:A0A3Q0KHF4]	schistosoma_mansoni_prjea36577	Mps one binder kinase activator-like 1 (Mob1 homolog 1) (Mob1) [Source:UniProtKB/TrEMBL;Acc:A0A3Q0KHF4]			SM_V10_5
0.503	0.00947816	0.006	0.0136741	0.155	0.151	Muscle 1	Smp_150980	P53 inducible protein-related	Source:UniProtKB/TrEMBL;Acc:A0A3Q0KQ23]	schistosoma_mansoni_prjea36577	P53 inducible protein-related [Source:UniProtKB/TrEMBL;Acc:A0A3Q0KQ23]			SM_V10_4
0.503	0.00234574	0.006	0.00338419	0.048	0.041	Muscle 1	Smp_266770	Basigin	Source:UniProtKB/TrEMBL;Acc:A0A5K4F2R6]	schistosoma_mansoni_prjea36577	Basigin [Source:UniProtKB/TrEMBL;Acc:A0A5K4F2R6]			SM_V10_4
0.503	0.0160411	0.006	0.0231425	0.352	0.35	Muscle 1	Smp_070930	Proteasome subunit alpha type	Source:UniProtKB/TrEMBL;Acc:G4M183]	schistosoma_mansoni_prjea36577	Proteasome subunit alpha type [Source:UniProtKB/TrEMBL;Acc:G4M183]			SM_V10_4
0.503	0.0231188	0.006	0.0333534	0.141	0.137	Muscle 1	Smp_058990	Smp_058990	Smp_058990~	schistosoma_mansoni_prjea36577				SM_V10_4
0.503	0.00101107	0.006	0.00145867	0.05	0.043	Muscle 1	Smp_247870	PSP1 C-terminal domain-containing protein	Source:UniProtKB/TrEMBL;Acc:A0A5K4F175]	schistosoma_mansoni_prjea36577	PSP1 C-terminal domain-containing protein [Source:UniProtKB/TrEMBL;Acc:A0A5K4F175]			SM_V10_4
0.503	0.0037241	0.006	0.00537274	0.016	0.01	Muscle 1	Smp_306910	Integrin	Source:UniProtKB/TrEMBL;Acc:A0A5K4F4I2]	schistosoma_mansoni_prjea36577	Integrin [Source:UniProtKB/TrEMBL;Acc:A0A5K4F4I2]	alpha-Int3opt	UniProtKB Gene Name	SM_V10_4
0.503	0.00459372	0.006	0.00662734	0.032	0.027	Muscle 1	Smp_158400	Smp_158400	Smp_158400~	schistosoma_mansoni_prjea36577				SM_V10_4
0.503	0.0124814	0.006	0.0180068	0.087	0.082	Muscle 1	Smp_211050	acylaminoacyl-peptidase	Source:UniProtKB/TrEMBL;Acc:A0A3Q0KVB3]	schistosoma_mansoni_prjea36577	acylaminoacyl-peptidase [Source:UniProtKB/TrEMBL;Acc:A0A3Q0KVB3]			SM_V10_4
0.503	0.0047396	0.006	0.0068378	0.043	0.038	Muscle 1	Smp_038710	E3 ubiquitin-protein ligase E3D	Source:UniProtKB/TrEMBL;Acc:A0A3Q0KEP2]	schistosoma_mansoni_prjea36577	E3 ubiquitin-protein ligase E3D [Source:UniProtKB/TrEMBL;Acc:A0A3Q0KEP2]			SM_V10_4
0.503	0.00392046	0.006	0.00565603	0.035	0.029	Muscle 1	Smp_312720	MFS domain-containing protein	Source:UniProtKB/TrEMBL;Acc:A0A5K4F3E2]	schistosoma_mansoni_prjea36577	MFS domain-containing protein [Source:UniProtKB/TrEMBL;Acc:A0A5K4F3E2]			SM_V10_4
0.503	0.00421989	0.006	0.00608802	0.05	0.043	Muscle 1	Smp_179930	Syntaxin, putative	Source:UniProtKB/TrEMBL;Acc:A0A3Q0KTV4]	schistosoma_mansoni_prjea36577	Syntaxin, putative [Source:UniProtKB/TrEMBL;Acc:A0A3Q0KTV4]			SM_V10_4
0.503	0.00684007	0.006	0.00986813	0.032	0.027	Muscle 1	Smp_343450	Chorein_N domain-containing protein	Source:UniProtKB/TrEMBL;Acc:A0A5K4FCT9]	schistosoma_mansoni_prjea36577	Chorein_N domain-containing protein [Source:UniProtKB/TrEMBL;Acc:A0A5K4FCT9]			SM_V10_4
0.503	0.00552357	0.006	0.00796883	0.029	0.023	Muscle 1	Smp_142090	Structure-specific endonuclease subunit SLX4	Source:UniProtKB/TrEMBL;Acc:A0A5K4EQD8]	schistosoma_mansoni_prjea36577	Structure-specific endonuclease subunit SLX4 [Source:UniProtKB/TrEMBL;Acc:A0A5K4EQD8]			SM_V10_4
0.503	0.0055104	0.006	0.00794982	0.027	0.021	Muscle 1	Smp_202400	Smp_202400	Source:UniProtKB/TrEMBL;Acc:A0A3Q0KUW8]	schistosoma_mansoni_prjea36577	Smp_202400 [Source:UniProtKB/TrEMBL;Acc:A0A3Q0KUW8]			SM_V10_3
0.503	0.00544437	0.006	0.00785457	0.036	0.03	Muscle 1	Smp_100120	alpha-1,2-Mannosidase	Source:UniProtKB/TrEMBL;Acc:A0A3Q0KJS9]	schistosoma_mansoni_prjea36577	alpha-1,2-Mannosidase [Source:UniProtKB/TrEMBL;Acc:A0A3Q0KJS9]			SM_V10_3
0.503	0.00380461	0.006	0.00548889	0.057	0.05	Muscle 1	Smp_027010	Putative clathrin coat adaptor ap3 medium chain	Source:UniProtKB/TrEMBL;Acc:G4VFZ8]	schistosoma_mansoni_prjea36577	Putative clathrin coat adaptor ap3 medium chain [Source:UniProtKB/TrEMBL;Acc:G4VFZ8]			SM_V10_3
0.503	0.0206861	0.006	0.0298437	0.28	0.279	Muscle 1	Smp_091230	Ubiquitin-fold modifier 1	Source:UniProtKB/TrEMBL;Acc:C4QLP6]	schistosoma_mansoni_prjea36577	Ubiquitin-fold modifier 1 [Source:UniProtKB/TrEMBL;Acc:C4QLP6]			SM_V10_3
0.503	0.0055564	0.006	0.00801619	0.192	0.186	Muscle 1	Smp_144360	Myelin proteolipid-related	Source:UniProtKB/TrEMBL;Acc:A0A3Q0KNU5]	schistosoma_mansoni_prjea36577	Myelin proteolipid-related [Source:UniProtKB/TrEMBL;Acc:A0A3Q0KNU5]			SM_V10_3
0.503	0.00582127	0.006	0.00839832	0.011	0.006	Muscle 1	Smp_000180	Similar to potassium channel-interacting protein 4 isoform 4-related	Source:UniProtKB/TrEMBL;Acc:A0A3Q0KBA3]	schistosoma_mansoni_prjea36577	Similar to potassium channel-interacting protein 4 isoform 4-related [Source:UniProtKB/TrEMBL;Acc:A0A3Q0KBA3]			SM_V10_3
0.503	0.0102743	0.006	0.0148227	0.068	0.062	Muscle 1	Smp_000190	Oxidoreductase, short chain dehydrogenase/reductase family, putative	Source:UniProtKB/TrEMBL;Acc:A0A3Q0KBA7]	schistosoma_mansoni_prjea36577	Oxidoreductase, short chain dehydrogenase/reductase family, putative [Source:UniProtKB/TrEMBL;Acc:A0A3Q0KBA7]			SM_V10_3
0.503	0.00688764	0.006	0.00993677	0.028	0.022	Muscle 1	Smp_087580	Pcd6 interacting protein-related	Source:UniProtKB/TrEMBL;Acc:A0A3Q0KIV8]	schistosoma_mansoni_prjea36577	Pcd6 interacting protein-related [Source:UniProtKB/TrEMBL;Acc:A0A3Q0KIV8]			SM_V10_3
0.503	0.00577542	0.006	0.00833218	0.099	0.092	Muscle 1	Smp_013070	One cut domain family member	Source:UniProtKB/TrEMBL;Acc:G4VEW1]	schistosoma_mansoni_prjea36577	One cut domain family member [Source:UniProtKB/TrEMBL;Acc:G4VEW1]			SM_V10_3
0.503	0.00310432	0.006	0.00447859	0.04	0.033	Muscle 1	Smp_013050	TLDc domain-containing protein	Source:UniProtKB/TrEMBL;Acc:G4VEV9]	schistosoma_mansoni_prjea36577	TLDc domain-containing protein [Source:UniProtKB/TrEMBL;Acc:G4VEV9]			SM_V10_3
0.503	0.0023377	0.006	0.00337259	0.19	0.185	Muscle 1	Smp_013040	Cathepsin D (A01 family)	Source:UniProtKB/TrEMBL;Acc:G4VEV6]	schistosoma_mansoni_prjea36577	Cathepsin D (A01 family) [Source:UniProtKB/TrEMBL;Acc:G4VEV6]			SM_V10_3
0.503	0.00754278	0.006	0.0108819	0.042	0.035	Muscle 1	Smp_212540	Putative suppression of tumorigenicity	Source:UniProtKB/TrEMBL;Acc:A0A3Q0KVC8]	schistosoma_mansoni_prjea36577	Putative suppression of tumorigenicity [Source:UniProtKB/TrEMBL;Acc:A0A3Q0KVC8]			SM_V10_3
0.503	0.00233869	0.006	0.00337402	0.061	0.054	Muscle 1	Smp_308440	HAP2-GCS1 domain-containing protein	Source:UniProtKB/TrEMBL;Acc:A0A5K4F4U8]	schistosoma_mansoni_prjea36577	HAP2-GCS1 domain-containing protein [Source:UniProtKB/TrEMBL;Acc:A0A5K4F4U8]			SM_V10_3
0.503	0.0104581	0.006	0.0150879	0.122	0.116	Muscle 1	Smp_129520	GRIP domain-containing protein	Source:UniProtKB/TrEMBL;Acc:A0A3Q0KLK8]	schistosoma_mansoni_prjea36577	GRIP domain-containing protein [Source:UniProtKB/TrEMBL;Acc:A0A3Q0KLK8]			SM_V10_3
0.503	0.00548304	0.006	0.00791036	0.038	0.031	Muscle 1	Smp_129430	Putative myocyte-specific enhancer factor 2a	Source:UniProtKB/TrEMBL;Acc:A0A3Q0KLJ0]	schistosoma_mansoni_prjea36577	Putative myocyte-specific enhancer factor 2a [Source:UniProtKB/TrEMBL;Acc:A0A3Q0KLJ0]	Mef2	UniProtKB Gene Name	SM_V10_3
0.503	0.007554	0.006	0.0108981	0.056	0.05	Muscle 1	Smp_044250	Subfamily M67C unassigned peptidase (M67 family)	Source:UniProtKB/TrEMBL;Acc:G4VEI6]	schistosoma_mansoni_prjea36577	Subfamily M67C unassigned peptidase (M67 family) [Source:UniProtKB/TrEMBL;Acc:G4VEI6]			SM_V10_3
0.503	0.00467808	0.006	0.00674904	0.125	0.119	Muscle 1	Smp_018610	Mediator of RNA polymerase II transcription subunit 7	Source:UniProtKB/TrEMBL;Acc:G4VGM0]	schistosoma_mansoni_prjea36577	Mediator of RNA polymerase II transcription subunit 7 [Source:UniProtKB/TrEMBL;Acc:G4VGM0]			SM_V10_3
0.503	0.00416893	0.006	0.0060145	0.071	0.064	Muscle 1	Smp_166830	Methyltransferase-related	Source:UniProtKB/TrEMBL;Acc:A0A3Q0KSJ2]	schistosoma_mansoni_prjea36577	Methyltransferase-related [Source:UniProtKB/TrEMBL;Acc:A0A3Q0KSJ2]			SM_V10_3
0.503	0.00621091	0.006	0.00896046	0.03	0.023	Muscle 1	Smp_307950	Beta lactamase domain, putative	Source:UniProtKB/TrEMBL;Acc:A0A5K4F684]	schistosoma_mansoni_prjea36577	Beta lactamase domain, putative [Source:UniProtKB/TrEMBL;Acc:A0A5K4F684]			SM_V10_3
0.503	0.00689098	0.006	0.00994159	0.032	0.026	Muscle 1	Smp_317020	Brca1 interacting protein C-terminal helicase 1 brip1, putative	Source:UniProtKB/TrEMBL;Acc:A0A5K4F630]	schistosoma_mansoni_prjea36577	Brca1 interacting protein C-terminal helicase 1 brip1, putative [Source:UniProtKB/TrEMBL;Acc:A0A5K4F630]			SM_V10_3
0.503	0.0078533	0.006	0.0113299	0.048	0.042	Muscle 1	Smp_118780	2-aminoethanethiol dioxygenase	Source:UniProtKB/TrEMBL;Acc:A0A3Q0KK66]	schistosoma_mansoni_prjea36577	2-aminoethanethiol dioxygenase [Source:UniProtKB/TrEMBL;Acc:A0A3Q0KK66]			SM_V10_3
0.503	0.00768291	0.006	0.0110841	0.055	0.049	Muscle 1	Smp_094380	Putative fyve-containing	Source:UniProtKB/TrEMBL;Acc:A0A3Q0KJD3]	schistosoma_mansoni_prjea36577	Putative fyve-containing [Source:UniProtKB/TrEMBL;Acc:A0A3Q0KJD3]			SM_V10_2
0.503	0.00425825	0.006	0.00614336	0.042	0.037	Muscle 1	Smp_336700	PIPK domain-containing protein	Source:UniProtKB/TrEMBL;Acc:A0A5K4FBY6]	schistosoma_mansoni_prjea36577	PIPK domain-containing protein [Source:UniProtKB/TrEMBL;Acc:A0A5K4FBY6]			SM_V10_2
0.503	0.00686639	0.006	0.00990611	0.119	0.113	Muscle 1	Smp_102480	MEG 1	Source:UniProtKB/TrEMBL;Acc:A0A3Q0KJW1]	schistosoma_mansoni_prjea36577	MEG 1 [Source:UniProtKB/TrEMBL;Acc:A0A3Q0KJW1]			SM_V10_2
0.503	0.00691218	0.006	0.00997217	0.06	0.054	Muscle 1	Smp_331980	Fe2OG dioxygenase domain-containing protein	Source:UniProtKB/TrEMBL;Acc:A0A5K4FAC0]	schistosoma_mansoni_prjea36577	Fe2OG dioxygenase domain-containing protein [Source:UniProtKB/TrEMBL;Acc:A0A5K4FAC0]			SM_V10_2
0.503	0.00261402	0.006	0.00377123	0.042	0.037	Muscle 1	Smp_147590	Putative rac guanyl-nucleotide exchange factor	Source:UniProtKB/TrEMBL;Acc:G4VBI1]	schistosoma_mansoni_prjea36577	Putative rac guanyl-nucleotide exchange factor [Source:UniProtKB/TrEMBL;Acc:G4VBI1]			SM_V10_2
0.503	0.00192434	0.006	0.00277623	0.047	0.04	Muscle 1	Smp_333890	Pecanex-like protein	Source:UniProtKB/TrEMBL;Acc:A0A5K4FB28]	schistosoma_mansoni_prjea36577	Pecanex-like protein [Source:UniProtKB/TrEMBL;Acc:A0A5K4FB28]			SM_V10_2
0.503	0.00575363	0.006	0.00830073	0.021	0.015	Muscle 1	Smp_130110	Proteasome subunit alpha 6 (T01 family)	Source:UniProtKB/TrEMBL;Acc:A0A3Q0KLM6]	schistosoma_mansoni_prjea36577	Proteasome subunit alpha 6 (T01 family) [Source:UniProtKB/TrEMBL;Acc:A0A3Q0KLM6]			SM_V10_2
0.503	0.00369662	0.006	0.0053331	0.043	0.037	Muscle 1	Smp_048980	Putative multiple pdz domain protein	Source:UniProtKB/TrEMBL;Acc:A0A3Q0KFL8]	schistosoma_mansoni_prjea36577	Putative multiple pdz domain protein [Source:UniProtKB/TrEMBL;Acc:A0A3Q0KFL8]			SM_V10_2
[truncated: 56,010 more rows]

## Sheet: Supp File 1c
Supplementary File 1c - Seurat top 5 marker genes in all cell clusters
[truncated: 97 more rows]

## Sheet: Supp File 1d
Supplementary File 1d. Contribution of sorted and unsorted samples to the 19 cell clusters
[truncated: 21 more rows]

[truncated: 14 more sheets: Supp File 1e, Supp File 1f, Supp File 1g, Supp File 1h, Supp File 1i, Supp File 1j, Supp File 1k, Supp File 1l, Supp File 1m, Supp File 1n, Supp File 1o, Supp File 1p, Supp File 1q, Supp File 1r]
